# Supplementary material
Source: PubMed Central journal article supplement (PMC5420499)
Supplement: NIHMS842302-supplement-Supp__Fig__S1.pdf [file NIHMS842302-supplement-Supp__Fig__S1.pdf]

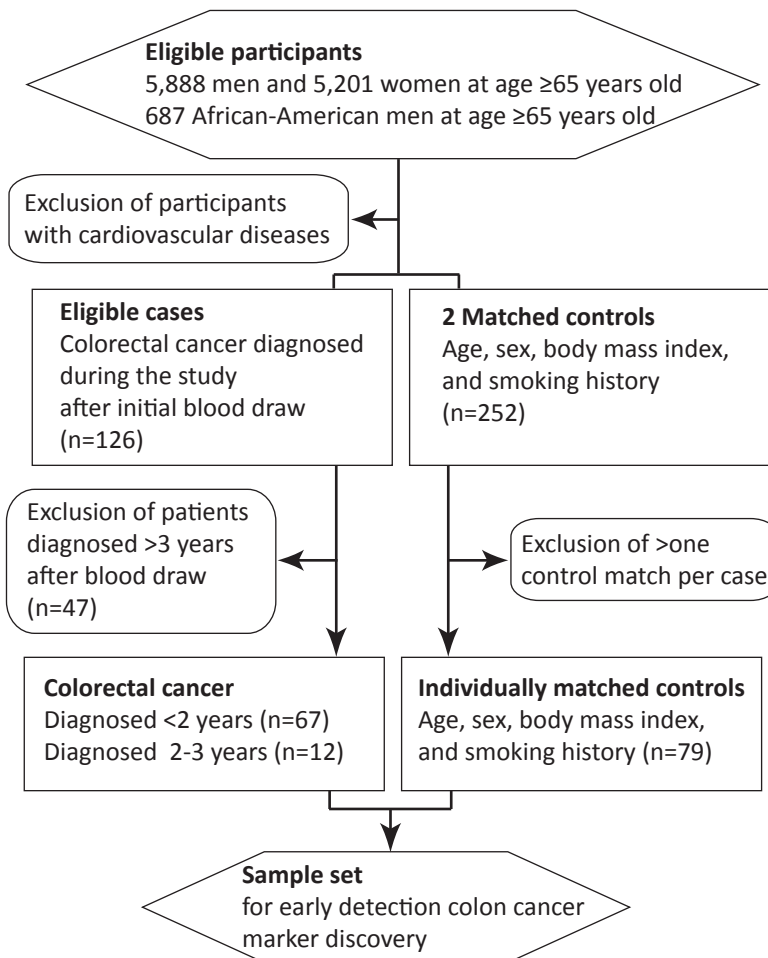

**Supplementary figure 1. STAndards for the Reporting of Diagnostic accuracy studies (STARD) flow diagram of the colon cancer prediagnostic samples collected during the Cardiovascular Health Study (1989-1999).**
