# Supplementary material
Source: PubMed Central journal article supplement (PMC5420499)
Supplement: NIHMS842302-supplement-Supp__Fig__S2.pdf [file NIHMS842302-supplement-Supp__Fig__S2.pdf]

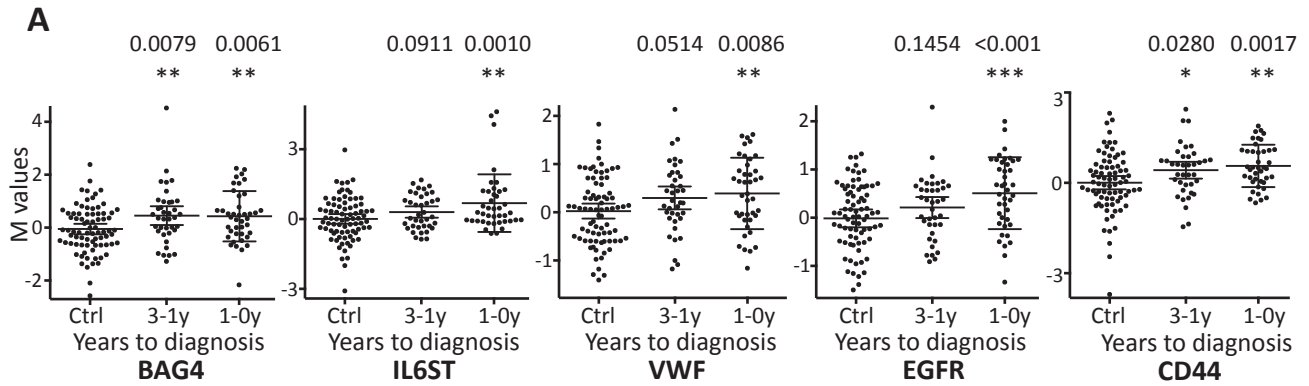

**B. BAG4, IL6ST, VWF, EGFR**

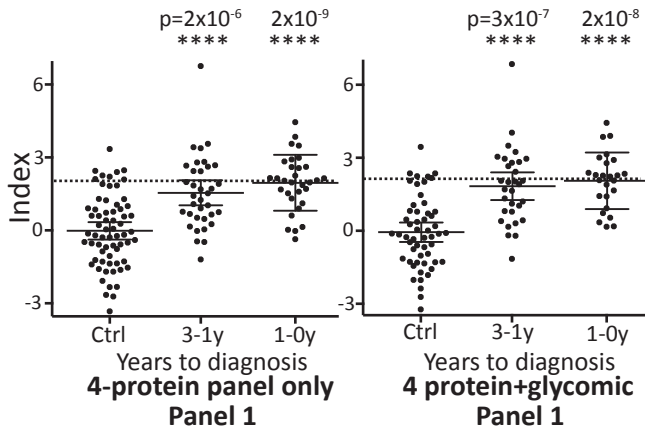

**C. BAG4, IL6ST, VWF, CD44**

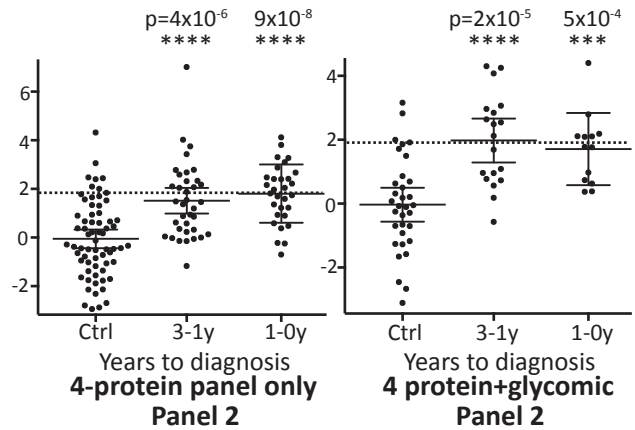

**Supplementary figure 2. Marker and panel significance as a function of blood draw to colon cancer diagnosis time in the CHS pre-diagnostic sample set.** (A) BAG4, IL6ST, VWF, EGFR and CD44 protein M-values were plotted based on 3-1 and 1-0 year categories of blood draw to cancer diagnosis time. (B, C) Case predictive index of the four protein panels and EGFR or CD44 sialyl Lewis-A and -X supplemented panels were plotted based on the blood draw to cancer diagnosis time. The dotted line represents 90% specificity. Statistical significance: \*,  $p < 0.05$ ; \*\*,  $p < 0.01$ ; \*\*\*,  $p < 0.001$ ; \*\*\*\*,  $p < 0.0001$ .
