# Supplementary material
Source: PubMed Central journal article supplement (PMC5420499)
Supplement: NIHMS842302-supplement-Supp__Fig__S3.pdf [file NIHMS842302-supplement-Supp__Fig__S3.pdf]

**A. BAG4, IL6ST, VWF, EGFR**

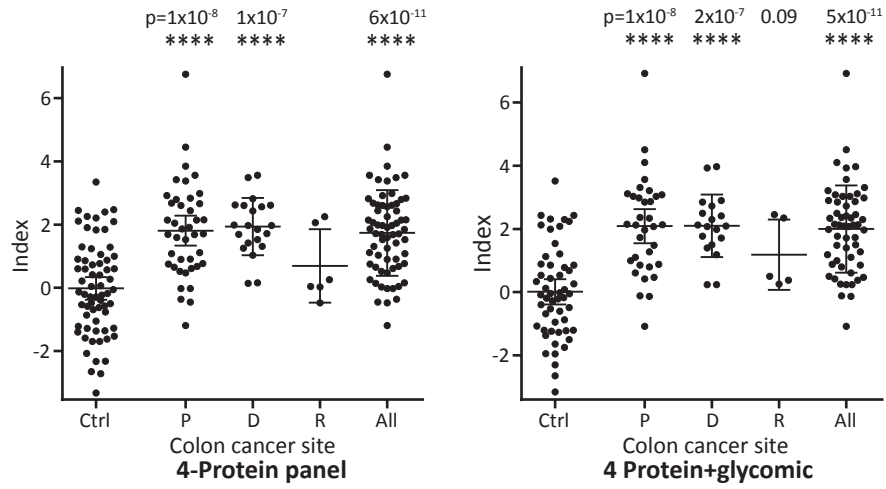

**B. BAG4, IL6ST, VWF, CD44**

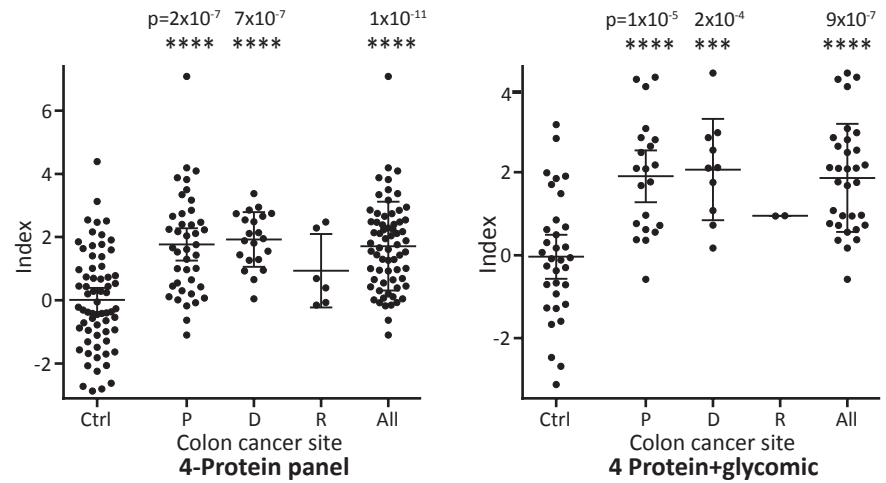

**Supplementary figure 3. Panel significance for different colon cancer sites in the CHS pre-diagnostic sample set.** Case predictive index of the four protein panels and the four proteins plus EGFR or CD44 sialyl Lewis-A and -X supplemented panels were plotted based on the colon cancer diagnosis sites. P: proximal colon cancer, D: distal colon cancer, R: rectal cancer. Statistical significance: \*\*\*,  $p < 0.001$ ; \*\*\*\*,  $p < 0.0001$ .
