# Supplementary material
Source: PubMed Central journal article supplement (PMC5420499)
Supplement: NIHMS842302-supplement-Supp__Fig__S4.pdf [file NIHMS842302-supplement-Supp__Fig__S4.pdf]

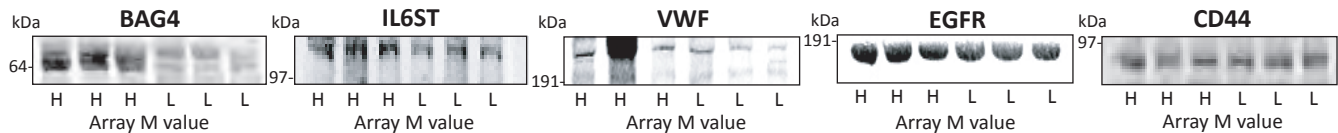

**Supplementary figure 4. Antibody validation for Western blotting detection of BAG4, IL6ST, VWF, EGFR and CD44.** The BAG4, IL6ST, VWF, EGFR and CD44 array antibodies were validated for their specificity in Western blotting. Six plasma samples with known higher (H) and lower (L) M-values for each protein were depleted of albumin and IgG and 30  $\mu$ g/lane was electrophoresed and immunoblotted with the appropriate antibodies. The blotting images show that prominent bands were identified at the expected molecular sizes (BAG4 at 65 kDa, IL6ST at 103 kDa, VWF at 309 kDa, EGFR at 134 kDa and CD44 at 80 kDa) and their intensity changes agreed with the M-value ratios.
