# Supplementary material
Source: PubMed Central journal article supplement (PMC5420499)
Supplement: NIHMS842302-supplement-Supp__Fig__S5.pdf [file NIHMS842302-supplement-Supp__Fig__S5.pdf]

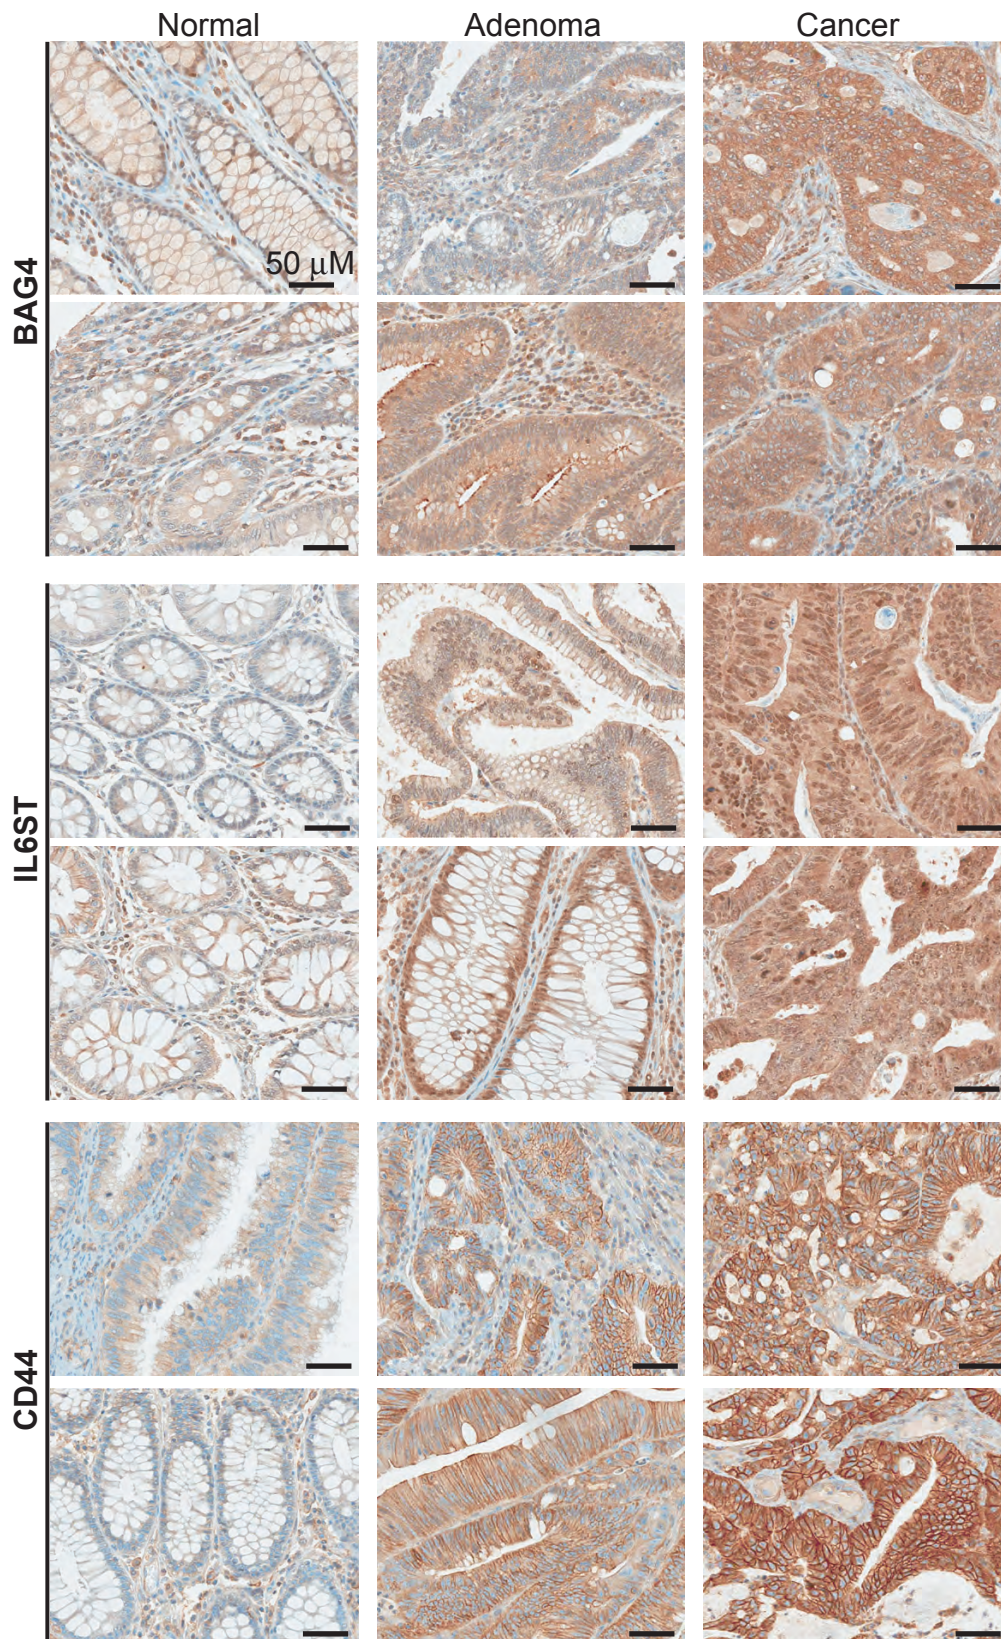

**Supplementary figure 5. Immunohistochemistry staining of BAG4, IL6ST and CD44 in colon tissue microarray sections.** The images are representative examples of staining from tissue microarrays containing 217 normal colon tissues, 263 adenomas, and 436 cancers. Each image is from a distinct subject.
