# Supplementary material
Source: PubMed Central journal article supplement (PMC5420499)
Supplement: NIHMS842302-supplement-Supp__Fig__S6.pdf [file NIHMS842302-supplement-Supp__Fig__S6.pdf]

### EDRN diagnostic plasma samples

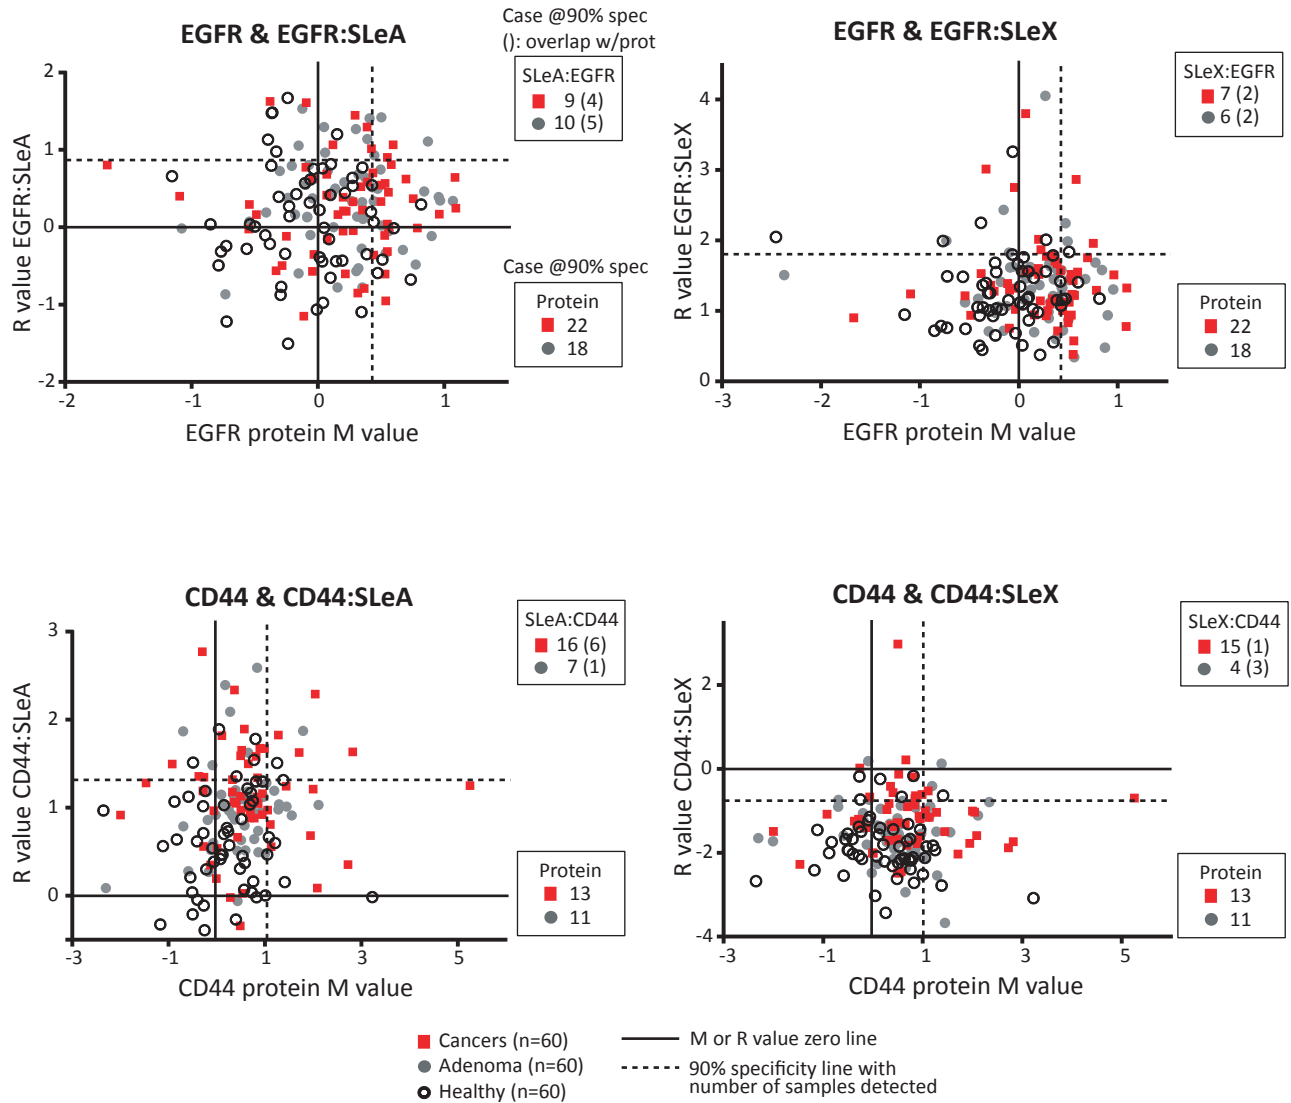

**Supplementary figure 6. Sialyl Lewis A and X expression on EGFR and CD44 and their hybrid marker utility for colon cancer early detection.** The scatter plots represent both protein and its glycan expression profiles of the same patient samples in the EDRN sample set (60 healthy, 60 adenomas and 60 cancers). For this, log<sub>2</sub> based protein expression M and glycan expression R values were plotted after normalization. For each marker class, the number of cases detected at 90% specificity was noted on side of the graph. The number of case detections made by both protein and glycan expression were noted in paranthesis. The overlap detection by SLeA and SLeX was observed only in 1 adenoma in EGFR and 1 cancer in CD44. Samples exclusively detected by the EGFR or CD44 glycan modifications suggest an additional biomarker value supplementary to its protein abundance.
