# Supplementary material
Source: PubMed Central journal article supplement (PMC5420499)
Supplement: NIHMS842302-supplement-Supp__Fig__S7.pdf [file NIHMS842302-supplement-Supp__Fig__S7.pdf]

### A. BAG4, IL6ST, VWF, EGFR

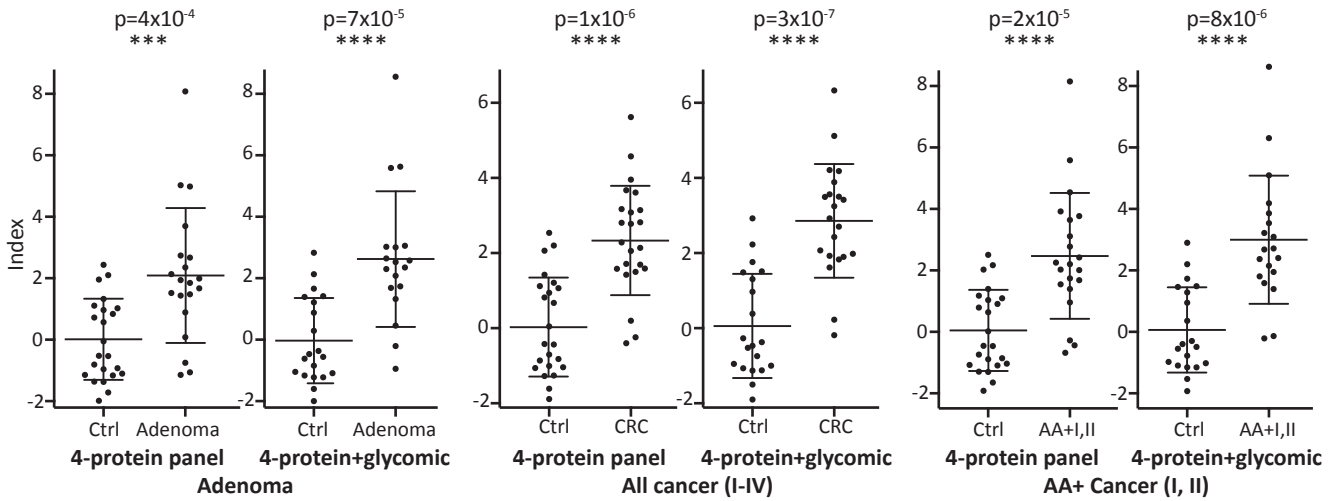

### B. BAG4, IL6ST, VWF, CD44

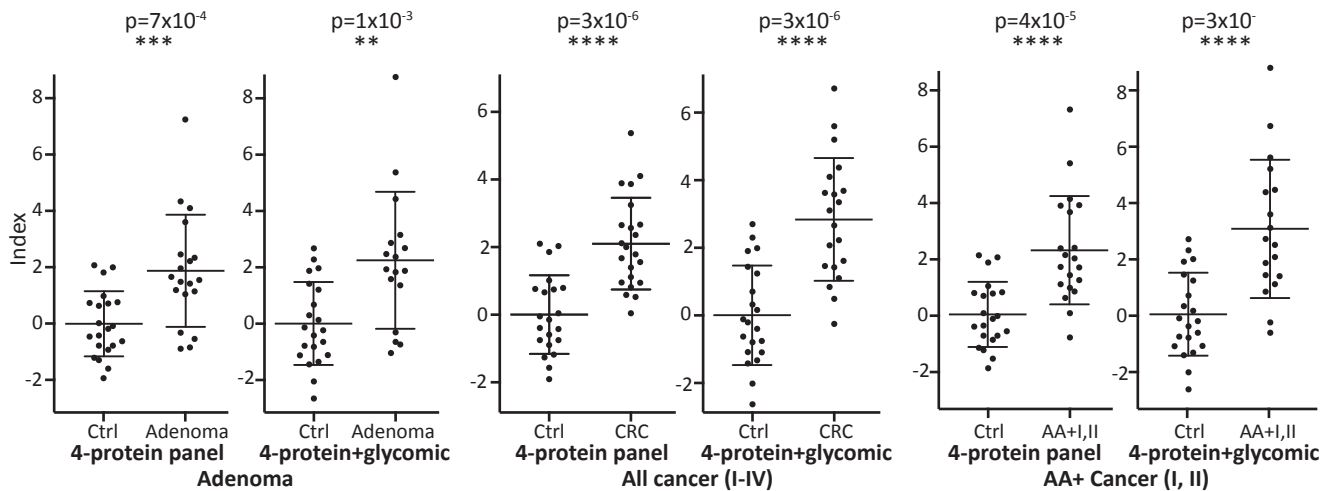

**Supplementary figure 7. Case prediction ability of the four protein panels and EGFR or CD44 sialyl Lewis-A and -X supplemented panels for adenoma and cancer samples.** Case predictive index of the four protein panels and glycan information (sialyl Lewis-A and -X) supplemented protein-glycemic panel were plotted for EDRN subgroups of adenoma, cancer and advanced adenoma plus stage I-II cancer. Adenoma includes all adenomas. AA: Advanced adenoma, only includes >1cm adenomas. I, II: cancer stages I and II. \*\*,  $p < 0.01$ ; \*\*\*,  $p < 0.001$ ; \*\*\*\*,  $p < 0.0001$ .
