# Supplementary material
Source: PubMed Central journal article supplement (PMC5420499)
Supplement: NIHMS842302-supplement-Supp__Table_S1.pdf [file NIHMS842302-supplement-Supp__Table_S1.pdf]

**Supplementary table 1. Marker coefficient values in the optimal maker panels for CHS sample set**

|                            | $\beta_{BAG4}$ | $\beta_{IL6ST}$ | $\beta_{VWF}$ | $\beta_{EGFR-Protein}$ | $\beta_{EGFR-SLeA}$ | $\beta_{EGFR-SLeX}$ | $\beta_{CD44-Protein}$ | $\beta_{CD44-SLeA}$ | $\beta_{CD44-SLeX}$ |
|----------------------------|----------------|-----------------|---------------|------------------------|---------------------|---------------------|------------------------|---------------------|---------------------|
| BAG4 + IL6ST + VWF + EGFR  | 1.25           | 0.64            | 0.9           | 0.26                   |                     |                     |                        |                     |                     |
| BAG4 + IL6ST + VWF + EGFR* | 1.29           | 0.61            | 1.01          | 0.36                   | 0.11                | 0.15                |                        |                     |                     |
| BAG4 + IL6ST + VWF + CD44  | 0.97           | 0.72            | 0.81          |                        |                     |                     | 0.35                   |                     |                     |
| BAG4 + IL6ST + VWF + CD44* | 1.37           | 0.66            | 1.06          |                        |                     |                     | 0.29                   | 0.28                | 0.2                 |

\*EGFR and CD44 glycomic information (SLeX and SLeA) are considered for these marker combinations.
