# Supplementary material
Source: PubMed Central journal article supplement (PMC5420499)
Supplement: NIHMS842302-supplement-Supp__Table_S2.pdf [file NIHMS842302-supplement-Supp__Table_S2.pdf]

**Supplementary table 2. Preliminary plasma colon cancer early-detection markers.** Novel pre-diagnostic markers were discovered from plasma samples collected from the patients who were diagnosed with colon cancer within 3 years after the blood draw. Seventy-nine pre-diagnostic plasma samples were compared to 79 matched controls. Proteomic analysis by antibody microarray revealed that a total 78 proteins were increased (positive odds ratio, OR) in pre-diagnostic samples from people that develop cancer at a cut-off of  $p \leq 0.015$  and  $AUC \geq 0.60$ . ‘Ab1 or Ab2’ in parentheses indicates the same protein was detected by 2 different antibodies. Sens: sensitivity at 90% specificity.

| Gene       | OR    | p value | q value | AUC  | *Sens | Gene       | OR    | p value | q value | AUC  | *Sens |
|------------|-------|---------|---------|------|-------|------------|-------|---------|---------|------|-------|
| IL1B       | 0.620 | 0.001   | 0.174   | 0.73 | 37.8% | RAC1 (Ab1) | 0.429 | 0.005   | 0.191   | 0.65 | 17.6% |
| EVI1       | 0.535 | 0.009   | 0.191   | 0.61 | 33.3% | SMO        | 0.411 | 0.011   | 0.191   | 0.63 | 17.6% |
| ITGA2      | 0.447 | 0.008   | 0.191   | 0.70 | 32.8% | PALB2      | 0.415 | 0.004   | 0.191   | 0.66 | 17.4% |
| BAG4       | 0.642 | 0.001   | 0.174   | 0.66 | 32.1% | MAPK1      | 0.373 | 0.006   | 0.191   | 0.62 | 16.9% |
| ZBTB22     | 0.428 | 0.011   | 0.191   | 0.63 | 27.9% | BRCA1      | 0.408 | 0.007   | 0.191   | 0.60 | 16.7% |
| PIK3CA     | 0.519 | 0.001   | 0.174   | 0.66 | 27.8% | GRB2       | 0.445 | 0.011   | 0.191   | 0.62 | 16.7% |
| TBC1D3     | 0.524 | 0.001   | 0.174   | 0.67 | 26.4% | MSMB       | 0.457 | 0.005   | 0.191   | 0.64 | 16.7% |
| LOC441347  | 0.526 | 0.001   | 0.174   | 0.67 | 26.0% | GPR125     | 0.367 | 0.013   | 0.193   | 0.65 | 16.5% |
| EGFR (Ab1) | 0.380 | 0.012   | 0.191   | 0.63 | 25.6% | SOX2       | 0.371 | 0.013   | 0.193   | 0.60 | 16.0% |
| VWF        | 0.338 | 0.011   | 0.191   | 0.62 | 25.0% | KDM5D      | 0.403 | 0.006   | 0.191   | 0.64 | 15.6% |
| GABRP      | 0.485 | 0.004   | 0.191   | 0.63 | 24.4% | FLT3       | 0.370 | 0.008   | 0.191   | 0.63 | 15.4% |
| EDNRA      | 0.343 | 0.013   | 0.191   | 0.63 | 24.1% | MDM2       | 0.451 | 0.003   | 0.182   | 0.64 | 15.4% |
| GCN1L1     | 0.610 | 0.000   | 0.174   | 0.69 | 23.4% | SERPING1   | 0.526 | 0.002   | 0.177   | 0.64 | 15.4% |
| PHYH       | 0.468 | 0.008   | 0.191   | 0.62 | 23.0% | CCND3      | 0.360 | 0.009   | 0.191   | 0.62 | 15.2% |
| UBE2S      | 0.419 | 0.003   | 0.182   | 0.64 | 22.8% | BRCA2      | 0.369 | 0.010   | 0.191   | 0.60 | 15.1% |
| VIP        | 0.498 | 0.002   | 0.176   | 0.64 | 22.1% | NOS3       | 0.411 | 0.010   | 0.191   | 0.64 | 14.9% |
| BIN1       | 0.434 | 0.007   | 0.191   | 0.65 | 21.9% | ANGPT1     | 0.402 | 0.006   | 0.191   | 0.63 | 14.7% |
| CCNB2      | 0.413 | 0.012   | 0.191   | 0.61 | 21.3% | CD8a       | 0.456 | 0.002   | 0.174   | 0.66 | 14.3% |
| GSDMB      | 0.431 | 0.005   | 0.191   | 0.65 | 21.1% | BIRC3      | 0.478 | 0.002   | 0.174   | 0.65 | 14.1% |
| CC2D1A     | 0.408 | 0.012   | 0.191   | 0.62 | 20.8% | BTG1       | 0.419 | 0.007   | 0.191   | 0.64 | 14.1% |
| PHB        | 0.419 | 0.014   | 0.198   | 0.62 | 20.5% | SELP       | 0.407 | 0.005   | 0.191   | 0.62 | 14.1% |
| ERCC5      | 0.451 | 0.007   | 0.191   | 0.62 | 19.7% | FN1 (Ab1)  | 0.424 | 0.012   | 0.191   | 0.63 | 13.9% |
| KIF20A     | 0.476 | 0.002   | 0.174   | 0.65 | 19.7% | PRL        | 0.445 | 0.006   | 0.191   | 0.63 | 13.9% |
| ANXA5      | 0.378 | 0.004   | 0.191   | 0.64 | 19.5% | WDR1       | 0.469 | 0.002   | 0.174   | 0.65 | 13.9% |
| MLL3       | 0.495 | 0.002   | 0.174   | 0.67 | 19.4% | SPP1 (Ab2) | 0.416 | 0.011   | 0.191   | 0.63 | 13.9% |
| CD44       | 0.462 | 0.005   | 0.191   | 0.63 | 19.2% | ALCAM      | 0.455 | 0.006   | 0.191   | 0.66 | 13.6% |
| RAB7L1     | 0.348 | 0.009   | 0.191   | 0.61 | 19.0% | BATF       | 0.374 | 0.009   | 0.191   | 0.61 | 13.5% |
| NPTX2      | 0.420 | 0.008   | 0.191   | 0.62 | 18.9% | NAT1       | 0.468 | 0.002   | 0.174   | 0.68 | 13.2% |
| SSBP2      | 0.635 | 0.002   | 0.174   | 0.65 | 18.7% | CSMD3      | 0.386 | 0.009   | 0.191   | 0.64 | 13.0% |
| LYPD1      | 0.434 | 0.002   | 0.176   | 0.64 | 18.4% | FN1 (Ab2)  | 0.427 | 0.006   | 0.191   | 0.64 | 13.0% |
| ANKRD6     | 0.393 | 0.012   | 0.191   | 0.61 | 18.2% | grn        | 0.400 | 0.010   | 0.191   | 0.64 | 13.0% |
| CDC25C     | 0.478 | 0.002   | 0.174   | 0.66 | 18.2% | NAIP       | 0.410 | 0.008   | 0.191   | 0.63 | 13.0% |
| MARCKSL1   | 0.449 | 0.005   | 0.191   | 0.65 | 18.2% | CDK4       | 0.391 | 0.014   | 0.202   | 0.62 | 12.7% |
| IL6ST      | 0.483 | 0.015   | 0.205   | 0.61 | 18.1% | RAC1 (Ab2) | 0.347 | 0.013   | 0.191   | 0.62 | 12.7% |
| CD4        | 0.383 | 0.013   | 0.191   | 0.61 | 17.9% | TCF4       | 0.391 | 0.010   | 0.191   | 0.60 | 10.7% |
| TMSB10     | 0.499 | 0.004   | 0.191   | 0.65 | 17.8% | EGFR (Ab2) | 0.373 | 0.009   | 0.191   | 0.63 | 10.4% |
| SPP1 (Ab1) | 0.431 | 0.012   | 0.191   | 0.63 | 17.7% | SV2A       | 0.405 | 0.004   | 0.191   | 0.65 | 10.4% |
| CHEK1      | 0.379 | 0.009   | 0.191   | 0.61 | 17.7% | HOXA3      | 0.429 | 0.005   | 0.191   | 0.65 | 9.2%  |
| PBX3       | 0.393 | 0.011   | 0.191   | 0.61 | 17.7% | NBN        | 0.349 | 0.009   | 0.191   | 0.63 | 7.9%  |

\*Sensitivity at 90% specificity
