# Supplementary material
Source: PubMed Central journal article supplement (PMC5420499)
Supplement: NIHMS842302-supplement-Supp__Table_S3.pdf [file NIHMS842302-supplement-Supp__Table_S3.pdf]

**Supplementary table 3. Raw array data of the 78 pre-diagnostic markers.**

These M values were normalized and adjusted as described in the Method section.

Early CRC: stage I & II; Late CRC: stages III & IV; A-Adenoma: advanced adenoma.

Sv normal: surveillance normal; Sc normal: screening normal.

| Sample ID         | Status  | ALCAM   | ANGPT1  | ANKRD6  | ANXA5    | BAG4    | BATF     | BIN1    | BIRC3    |
|-------------------|---------|---------|---------|---------|----------|---------|----------|---------|----------|
| Confirmed in EDRN |         |         | v       | v       | v        | v       |          |         | v        |
| CHS 1             | Control | -1.0620 | -4.2953 | -1.1625 | -6.4371  | 1.9244  | -14.2817 | 0.9712  | -5.7215  |
| CHS 2             | Cancer  | -1.9735 | -4.7942 | -0.8836 | -7.3571  | 0.8879  | -14.5118 | -3.7062 | -6.1855  |
| CHS 3             | Cancer  | -2.2112 | -3.9523 | -0.7127 | -6.2413  | 2.1914  | -15.5340 | 1.4425  | -5.3412  |
| CHS 4             | Control | -3.8623 | -5.3672 | -0.6908 | -8.1637  | -0.0615 | -15.9584 | 0.7721  | -6.8593  |
| CHS 5             | Control | -2.6302 | -4.0974 | -0.0998 | -6.0188  | 0.3781  | -15.4886 | 0.5419  | -5.1966  |
| CHS 6             | Cancer  | -2.3191 | -4.3350 | -1.5680 | -6.2576  | 1.2824  | -15.1280 | -0.8935 | -6.2044  |
| CHS 7             | Control | -3.3879 | -5.5794 | -0.6102 | -7.2771  | 0.3210  | -15.3775 | -0.5788 | -6.6132  |
| CHS 8             | Cancer  | -2.7072 | -3.3860 | 1.5779  | -6.5850  | 0.5231  | -15.3225 | -0.2726 | -6.7192  |
| CHS 9             | Cancer  | -1.7426 | -3.6005 | -0.9857 | -6.4256  | 1.4756  | -13.8245 | 0.1840  | -5.3277  |
| CHS 10            | Control | -2.4857 | -4.3488 | -1.2203 | -6.6204  | 0.3167  | -14.4586 | 1.2682  | -5.7548  |
| CHS 11            | Control | -5.6328 | -5.6282 | -1.2990 | -7.3682  | 0.1209  | -16.1848 | -0.9918 | -8.2963  |
| CHS 12            | Cancer  | -3.6115 | -3.7077 | -1.3057 | -7.0125  | 0.5056  | -14.7112 | 1.4103  | -4.9266  |
| CHS 13            | Cancer  | -0.1963 | -4.1631 | -1.1911 | -7.4039  | 0.8274  | -15.2035 | 2.0347  | -5.0539  |
| CHS 14            | Control | -0.9898 | -4.4308 | -1.7262 | -7.1550  | 0.3375  | -14.8579 | 0.8083  | -5.8644  |
| CHS 15            | Control | -2.1158 | -4.7204 | -1.6169 | -7.0878  | -0.3487 | -16.9879 | 0.4007  | -6.4577  |
| CHS 16            | Cancer  | -1.7387 | -4.9923 | -1.2785 | -6.2370  | 1.1421  | -15.7306 | -0.1793 | -6.3053  |
| CHS 17            | Cancer  | -2.3650 | -4.5397 | -0.9526 | -6.0080  | 2.2467  | -15.6416 | 0.2714  | -6.6345  |
| CHS 18            | Control | -0.3864 | -2.9255 | 0.9251  | -7.2685  | 0.8294  | -14.2906 | 0.8095  | -4.5456  |
| CHS 19            | Cancer  | -1.3935 | -4.1497 | -1.4946 | -7.4853  | -0.2592 | -14.9516 | 0.8097  | -6.6504  |
| CHS 20            | Control | -2.9461 | -5.7550 | -2.8278 | -8.4273  | 0.0154  | -16.6599 | -0.8761 | -7.5629  |
| CHS 21            | Cancer  | -1.4029 | -3.0726 | 1.9227  | -7.3985  | 0.5240  | -14.1944 | 0.9201  | -6.4859  |
| CHS 22            | Control | -4.3615 | -4.2552 | -0.3110 | -7.6305  | 0.4099  | -15.8238 | -0.9744 | -7.2106  |
| CHS 23            | Cancer  | -0.8857 | -4.2618 | -1.6970 | -6.8143  | 1.4586  | -14.6264 | 1.8525  | -4.8659  |
| CHS 24            | Control | -5.7967 | -8.8789 | -5.2919 | -12.1202 | -0.6401 | -17.7938 | -2.0298 | -11.2668 |
| CHS 25            | Cancer  | -2.1792 | -4.3384 | -1.4875 | -6.3998  | 2.7483  | -15.2149 | -0.4325 | -6.4723  |
| CHS 26            | Control | -2.5278 | -3.9575 | -1.7256 | -7.7538  | 1.7818  | -15.2918 | 1.7443  | -6.5283  |
| CHS 27            | Cancer  | -3.2854 | -3.7074 | -0.4775 | -7.6549  | 1.5475  | -14.5790 | 0.3416  | -6.0238  |
| CHS 28            | Control | -1.8308 | -4.5975 | -0.9385 | -6.8291  | 1.2768  | -15.0848 | 2.1662  | -5.7663  |
| CHS 29            | Cancer  | -2.3654 | -4.4105 | -1.4408 | -8.0235  | 1.2653  | -15.6273 | 1.3409  | -6.4409  |
| CHS 30            | Control | -2.5264 | -3.7357 | -0.5960 | -6.8517  | 0.5054  | -15.0856 | 0.5196  | -6.0598  |
| CHS 31            | Control | -2.5684 | -4.8286 | -1.1341 | -6.0113  | 1.0353  | -15.6833 | 0.8706  | -6.1790  |
| CHS 32            | Cancer  | -2.2630 | -4.8234 | -1.3346 | -6.0473  | 2.3306  | -15.2352 | 2.1263  | -6.8516  |
| CHS 33            | Cancer  | -1.5402 | -3.4072 | -1.1705 | -7.0394  | 0.5506  | -14.8118 | 2.3445  | -5.5347  |
| CHS 34            | Control | -2.0692 | -4.1871 | -1.5285 | -8.2373  | -0.1150 | -16.1620 | 0.4877  | -6.4046  |
| CHS 35            | Control | -2.4068 | -4.5882 | -1.2029 | -7.9672  | 2.8914  | -15.4874 | 0.1493  | -6.9811  |
| CHS 36            | Cancer  | -2.5494 | -4.9886 | -2.0089 | -7.7428  | -0.0444 | -15.0911 | -0.3649 | -5.8025  |
| CHS 37            | Cancer  | -2.6433 | -4.9475 | -1.2105 | -8.3282  | 0.5181  | -15.1161 | -0.7775 | -6.3953  |
| CHS 38            | Control | -3.2543 | -5.3148 | -0.5899 | -7.3294  | 1.0294  | -14.7831 | -1.0311 | -7.0495  |
| CHS 39            | Control | -3.3588 | -4.7459 | -1.7429 | -7.6928  | -0.8474 | -16.7444 | -1.4457 | -8.5767  |
| CHS 40            | Cancer  | -2.8450 | -4.2274 | -0.5651 | -6.6214  | 0.2742  | -15.2329 | -0.4357 | -5.4677  |
| CHS 41            | Control | -2.8504 | -5.2611 | -0.9888 | -7.7841  | -0.9946 | -16.6578 | -0.2060 | -7.1080  |

| Sample ID         | Status  | ALCAM   | ANGPT1  | ANKRD6  | ANXA5   | BAG4    | BATF     | BIN1    | BIRC3   |
|-------------------|---------|---------|---------|---------|---------|---------|----------|---------|---------|
| Confirmed in EDRN |         |         |         | v       |         | v       |          |         | v       |
| CHS 42            | Cancer  | -1.8575 | -4.9735 | 0.0390  | -6.9963 | -1.6604 | -14.8682 | -1.6018 | -6.0984 |
| CHS 43            | Control | -2.3791 | -4.1902 | -0.4603 | -7.1071 | -0.8639 | -16.2004 | 0.1843  | -6.2119 |
| CHS 44            | Cancer  | -2.5541 | -4.5355 | -0.3252 | -7.0097 | 1.0073  | -15.3427 | -0.4720 | -5.8359 |
| CHS 45            | Control | -2.3656 | -4.6157 | -1.5425 | -7.4873 | 0.0825  | -14.7181 | -0.6739 | -6.5145 |
| CHS 46            | Cancer  | -1.6080 | -4.3623 | -0.6289 | -5.9350 | 2.5377  | -14.5662 | -0.0737 | -5.3773 |
| CHS 47            | Cancer  | -2.1847 | -4.9923 | -1.1660 | -7.0660 | 0.4166  | -15.1782 | -0.4778 | -6.0995 |
| CHS 48            | Control | -2.1918 | -5.5007 | -0.2735 | -6.8852 | -0.8644 | -14.7811 | -0.2879 | -6.2705 |
| CHS 49            | Cancer  | -2.5571 | -5.0899 | -0.8574 | -7.4404 | 1.0048  | -15.4552 | 0.2560  | -6.4821 |
| CHS 50            | Control | -2.4938 | -4.5884 | -1.6538 | -7.3768 | 0.4933  | -15.5377 | -0.0240 | -6.4868 |
| CHS 51            | Cancer  | -3.2440 | -4.9131 | -1.1622 | -7.3740 | 0.8599  | -14.5907 | 0.6948  | -6.3269 |
| CHS 52            | Control | -2.8056 | -4.5009 | -1.8552 | -7.6293 | 0.2758  | -15.1128 | -0.4601 | -6.7702 |
| CHS 53            | Control | -2.0224 | -4.4235 | -1.1368 | -8.3310 | 0.1526  | -14.6606 | -0.3515 | -5.5217 |
| CHS 54            | Cancer  | -2.8188 | -4.0708 | -0.8539 | -7.3134 | 0.2961  | -15.6481 | -0.6662 | -5.9227 |
| CHS 55            | Cancer  | -3.4488 | -4.1461 | -1.4865 | -8.1156 | 1.5132  | -15.3854 | 0.2676  | -6.1390 |
| CHS 56            | Control | -2.2751 | -4.5921 | -1.3450 | -8.3406 | -0.5103 | -15.3617 | -0.0315 | -5.4872 |
| CHS 57            | Control | -3.0066 | -5.7803 | -1.4994 | -7.4656 | 1.0482  | -15.4549 | 0.2146  | -6.1088 |
| CHS 58            | Cancer  | -2.5468 | -4.1466 | -0.9299 | -7.5193 | 1.0444  | -15.5172 | 0.1007  | -5.8467 |
| CHS 59            | Cancer  | -2.3614 | -4.1980 | -1.4464 | -7.8726 | 0.2368  | -15.3968 | -0.3076 | -6.0039 |
| CHS 60            | Control | -2.5447 | -5.3268 | 0.5881  | -6.7059 | 0.7271  | -15.5917 | -0.2032 | -6.5295 |
| CHS 61            | Cancer  | -2.5276 | -3.5144 | -0.4503 | -5.3377 | 2.6996  | -14.1854 | -0.9143 | -6.1862 |
| CHS 62            | Control | -2.9052 | -5.8043 | -2.8629 | -8.2096 | -0.4477 | -17.5064 | -0.0724 | -8.0643 |
| CHS 63            | Cancer  | -0.8316 | -3.8161 | -0.4582 | -5.2955 | 2.2891  | -14.8411 | 1.3262  | -5.9602 |
| CHS 64            | Control | -3.1861 | -4.6230 | -1.3031 | -7.7166 | 0.4232  | -15.4826 | -0.8961 | -7.0010 |
| CHS 65            | Cancer  | -1.5079 | -3.9895 | 1.1032  | -6.8031 | 0.8065  | -14.6449 | 0.9375  | -6.2723 |
| CHS 66            | Control | -1.1629 | -3.8941 | -0.3546 | -6.2394 | 1.6382  | -15.0883 | -0.2779 | -5.9642 |
| CHS 67            | Control | -3.1693 | -6.1705 | -2.7982 | -6.9540 | -2.0698 | -17.4216 | -0.4591 | -8.6684 |
| CHS 68            | Cancer  | -2.2969 | -4.4455 | -0.7509 | -7.0237 | 0.5059  | -14.6790 | -0.0376 | -6.6826 |
| CHS 69            | Cancer  | -1.6815 | -4.9331 | -0.7544 | -6.7984 | 1.1790  | -15.0084 | 1.1080  | -5.7404 |
| CHS 70            | Control | -2.0174 | -4.1078 | -0.6611 | -6.8246 | 0.8129  | -14.4538 | 1.7172  | -6.7119 |
| CHS 71            | Cancer  | -1.8811 | -4.4706 | -0.6857 | -6.5230 | 1.0802  | -15.0470 | 0.6902  | -5.9684 |
| CHS 72            | Control | -2.9118 | -3.6918 | -0.8852 | -7.5905 | 0.3498  | -15.4720 | 1.3834  | -5.2047 |
| CHS 73            | Control | -2.0399 | -6.0026 | -0.9507 | -8.2899 | 1.0375  | -14.4984 | -1.1518 | -7.6849 |
| CHS 74            | Cancer  | -2.2751 | -3.7952 | -1.9812 | -7.0738 | 0.3775  | -15.0988 | 1.4640  | -5.2039 |
| CHS 75            | Cancer  | -2.7498 | -3.8629 | -1.2133 | -6.2721 | 0.6120  | -16.0937 | -0.2050 | -6.2339 |
| CHS 76            | Control | -3.2647 | -5.1122 | -1.3925 | -7.8203 | -0.0231 | -15.0480 | 0.0301  | -6.8154 |
| CHS 77            | Control | -3.0709 | -5.7686 | -2.9577 | -8.5723 | -0.5803 | -16.6369 | 1.6510  | -7.4590 |
| CHS 78            | Cancer  | -1.5893 | -4.2794 | -0.7083 | -7.6161 | -0.1504 | -16.2609 | 1.6385  | -5.8915 |
| CHS 79            | Cancer  | -2.4097 | -5.0346 | -1.8413 | -6.5612 | 0.8450  | -16.1087 | 0.6351  | -5.8746 |
| CHS 80            | Control | -2.1085 | -3.0545 | -1.7667 | -6.2639 | 0.2130  | -16.4989 | -1.3156 | -5.3759 |
| CHS 81            | Control | -1.8128 | -4.4435 | -1.8380 | -6.6170 | 1.0110  | -16.2150 | -0.4583 | -6.8040 |
| CHS 82            | Cancer  | -2.7400 | -4.6357 | -2.0575 | -7.4983 | 5.0294  | -14.3917 | 0.9121  | -6.4177 |
| CHS 83            | Cancer  | -2.7840 | -3.9119 | -1.2505 | -6.5252 | 1.0661  | -14.3245 | 0.3590  | -5.5216 |
| CHS 84            | Control | -3.5487 | -4.6015 | -1.4999 | -6.8201 | 0.1234  | -15.0073 | -1.2279 | -6.2360 |
| CHS 85            | Cancer  | -2.0496 | -4.9292 | -0.4577 | -7.4311 | 0.8991  | -13.8172 | -0.0404 | -6.0932 |
| CHS 86            | Control | -2.2770 | -5.3976 | -1.2377 | -7.5698 | 2.2685  | -15.3559 | -0.6702 | -6.5886 |

| Sample ID         | Status  | ALCAM   | ANGPT1  | ANKRD6  | ANXA5    | BAG4    | BATF     | BIN1    | BIRC3   |
|-------------------|---------|---------|---------|---------|----------|---------|----------|---------|---------|
| Confirmed in EDRN |         |         |         | v       |          | v       |          |         | v       |
| CHS 87            | Control | -3.0348 | -5.4797 | -1.5100 | -8.3177  | -0.1315 | -16.4289 | -1.5807 | -7.0091 |
| CHS 88            | Cancer  | -3.3108 | -3.4652 | -1.1455 | -6.6359  | -0.5433 | -16.1088 | 0.6515  | -7.0868 |
| CHS 89            | Control | -1.8183 | -5.0058 | -0.0745 | -8.0020  | 1.5591  | -15.1484 | 0.4843  | -5.8774 |
| CHS 90            | Cancer  | -1.9329 | -4.3187 | 1.8268  | -6.9827  | 1.0126  | -14.4085 | 0.7433  | -5.8723 |
| CHS 91            | Cancer  | -2.0773 | -5.0463 | 0.1503  | -6.1755  | 1.4868  | -15.0084 | -0.2550 | -6.2386 |
| CHS 92            | Control | -1.6732 | -4.7430 | 0.1326  | -7.0189  | -0.1605 | -15.1243 | 0.0630  | -6.3842 |
| CHS 93            | Control | -3.3028 | -4.2829 | -0.6848 | -6.9477  | -0.0697 | -15.3160 | 0.2544  | -6.5053 |
| CHS 94            | Cancer  | -3.4444 | -3.9172 | -1.1105 | -6.9497  | 0.5455  | -14.5825 | 1.6151  | -6.0326 |
| CHS 95            | Control | -1.1353 | -3.7009 | -0.3048 | -7.1839  | -0.1630 | -15.9908 | 0.2039  | -6.5483 |
| CHS 96            | Cancer  | -1.7545 | -4.4482 | -0.6268 | -7.6555  | 0.1438  | -14.0709 | 0.1941  | -6.2954 |
| CHS 97            | Cancer  | -3.2362 | -5.0209 | -1.7656 | -6.6537  | 1.7797  | -15.6449 | -0.8420 | -6.0254 |
| CHS 98            | Control | -3.3170 | -6.8334 | -2.4084 | -8.7128  | -0.1570 | -17.0115 | 0.0091  | -7.4032 |
| CHS 99            | Cancer  | -2.4956 | -5.2855 | 0.4811  | -6.8513  | 1.2260  | -16.3507 | 0.8079  | -6.2701 |
| CHS 100           | Control | -2.5548 | -3.4372 | -1.5935 | -6.8215  | 1.2568  | -15.3291 | 0.9966  | -6.6846 |
| CHS 101           | Cancer  | -1.7034 | -3.7598 | -0.7228 | -7.4563  | 0.3048  | -13.8985 | 1.4802  | -6.1946 |
| CHS 102           | Control | -0.8362 | -3.4936 | -0.1073 | -6.7573  | 0.6612  | -14.0443 | 1.9199  | -5.4715 |
| CHS 103           | Cancer  | -1.8852 | -4.6163 | 0.1217  | -7.0628  | 0.0142  | -15.8665 | 0.6184  | -6.0675 |
| CHS 104           | Control | -2.5184 | -4.3624 | -1.0668 | -7.2664  | 1.0093  | -15.2136 | -0.8697 | -6.8799 |
| CHS 105           | Cancer  | -1.8557 | -4.2779 | -1.8595 | -7.3902  | -0.5487 | -15.3858 | 0.0476  | -6.1147 |
| CHS 106           | Control | -3.0492 | -5.4099 | -0.5060 | -7.8337  | 1.8945  | -15.1316 | -0.9503 | -6.8073 |
| CHS 107           | Cancer  | -2.4019 | -5.1061 | -0.8150 | -8.2255  | -0.3324 | -15.8173 | 0.9102  | -6.3723 |
| CHS 108           | Control | -2.4427 | -4.1308 | -1.2286 | -6.0853  | 1.4082  | -14.1506 | -0.9322 | -6.1023 |
| CHS 109           | Control | -2.5641 | -4.6058 | -1.1502 | -7.4813  | 0.7275  | -16.1756 | 0.3717  | -6.7295 |
| CHS 110           | Cancer  | -2.7198 | -5.2400 | -1.1794 | -7.4241  | -0.5079 | -15.5272 | -0.2831 | -7.1937 |
| CHS 111           | Control | -2.7133 | -5.2960 | -1.3643 | -8.8613  | -0.1516 | -16.0158 | 0.1825  | -6.7698 |
| CHS 112           | Cancer  | -2.7222 | -4.0597 | -0.6078 | -5.5743  | 1.9055  | -15.1101 | -0.0202 | -6.7362 |
| CHS 113           | Control | -1.0242 | -4.0104 | -0.6808 | -6.4815  | 0.8852  | -15.1545 | 0.5334  | -5.0210 |
| CHS 114           | Cancer  | -2.6814 | -3.1699 | -1.3164 | -7.9274  | 2.4275  | -14.4135 | 0.1700  | -6.2827 |
| CHS 117           | Control | -2.3975 | -5.4961 | -1.2396 | -6.7520  | 0.1776  | -14.5367 | -0.3085 | -6.3174 |
| CHS 118           | Cancer  | -2.9396 | -3.9346 | -1.4893 | -6.7739  | 0.8264  | -15.1775 | -0.5532 | -6.3136 |
| CHS 119           | Cancer  | -2.1962 | -4.5766 | -0.8173 | -7.1341  | 0.3783  | -15.0539 | 0.2604  | -5.9767 |
| CHS 120           | Control | -3.0994 | -4.0111 | -1.1426 | -6.8738  | -0.1441 | -15.9054 | 0.1129  | -5.6453 |
| CHS 121           | Control | -3.0915 | -3.9530 | -1.0741 | -7.2470  | 0.0618  | -15.3921 | -0.7950 | -6.4739 |
| CHS 122           | Cancer  | -3.0334 | -4.4927 | -1.0263 | -7.0531  | 1.8824  | -14.8258 | -0.0399 | -6.2244 |
| CHS 123           | Cancer  | -1.9231 | -4.2842 | -1.0490 | -7.0116  | 1.7052  | -14.5747 | 0.4207  | -6.1419 |
| CHS 124           | Control | -1.4881 | -4.8113 | -2.0645 | -6.1975  | -0.5201 | -14.8490 | -0.3084 | -5.9460 |
| CHS 125           | Cancer  | -1.8074 | -5.1119 | -1.8137 | -7.4991  | 1.0271  | -16.4330 | -0.0480 | -6.5924 |
| CHS 126           | Control | -0.8776 | -4.7335 | -0.1698 | -6.4324  | 0.8674  | -15.7998 | -0.4296 | -6.6533 |
| CHS 127           | Cancer  | -1.8412 | -3.2379 | -0.8755 | -4.9752  | 2.6471  | -14.4260 | 1.5502  | -5.6926 |
| CHS 128           | Control | -4.9285 | -6.3855 | -3.5435 | -10.1185 | -1.5890 | -17.8289 | -0.5415 | -8.7415 |
| CHS 129           | Control | -3.6412 | -5.8568 | -0.9668 | -8.6434  | -0.6671 | -16.9126 | -0.3407 | -7.0164 |
| CHS 130           | Cancer  | -3.1929 | -4.8312 | -0.9730 | -7.5437  | -0.4697 | -14.7069 | -0.5197 | -6.8346 |
| CHS 131           | Cancer  | -2.4071 | -4.7386 | -1.1459 | -7.2544  | -0.1759 | -15.1460 | 1.0827  | -5.6050 |
| CHS 132           | Control | -2.7534 | -4.7309 | -0.3336 | -7.2353  | 0.2488  | -14.9701 | 0.6429  | -5.2564 |
| CHS 133           | Cancer  | -3.9894 | -6.0439 | -1.5532 | -7.6036  | -0.7724 | -17.0727 | -0.7702 | -7.6690 |

| Sample ID Status  | ALCAM   | ANGPT1  | ANKRD6  | ANXA5   | BAG4    | BATF     | BIN1    | BIRC3   |
|-------------------|---------|---------|---------|---------|---------|----------|---------|---------|
| Confirmed in EDRN |         |         | v       |         | v       |          |         | v       |
| CHS 134 Control   | -2.9349 | -5.3223 | -1.2269 | -6.7143 | 1.2261  | -15.7382 | -0.8085 | -7.0259 |
| CHS 135 Cancer    | -1.3725 | -3.6106 | -0.7038 | -7.4979 | 1.1537  | -13.9636 | 0.6392  | -6.4711 |
| CHS 136 Control   | -2.0319 | -3.4369 | 0.5465  | -6.9711 | 1.9316  | -14.4925 | -0.0041 | -5.2137 |
| CHS 137 Cancer    | -1.6803 | -5.4713 | -1.3600 | -7.0987 | 2.1813  | -14.3744 | -0.2683 | -6.4926 |
| CHS 138 Control   | -2.8276 | -4.8214 | -0.9129 | -7.5887 | 1.4167  | -14.8227 | 0.0560  | -6.4644 |
| CHS 139 Cancer    | -1.6572 | -3.2508 | -1.0873 | -7.1953 | 0.9741  | -14.6901 | 0.0080  | -5.5322 |
| CHS 140 Control   | -1.1019 | -3.0609 | 0.0478  | -7.3472 | -0.0941 | -15.2877 | 1.8421  | -5.4202 |
| CHS 141 Cancer    | -2.3576 | -4.1735 | -0.5541 | -6.2767 | 0.7396  | -15.9763 | 1.2055  | -5.6676 |
| CHS 142 Control   | -3.2066 | -4.2420 | -0.4966 | -6.8644 | 1.1746  | -15.3741 | 0.2112  | -6.4044 |
| CHS 143 Cancer    | -2.4221 | -5.2862 | -1.1789 | -7.2188 | 1.1560  | -15.1470 | 0.6545  | -6.5184 |
| CHS 144 Control   | -1.6368 | -3.3499 | -0.9850 | -7.2125 | 0.3034  | -14.7393 | 0.5553  | -5.9920 |
| CHS 145 Cancer    | -2.7369 | -4.6767 | -0.0711 | -7.5730 | 0.1478  | -15.9417 | -0.0365 | -7.0665 |
| CHS 146 Control   | -2.3704 | -4.8965 | -0.6143 | -7.0445 | 1.0295  | -15.1580 | -0.2967 | -6.9382 |
| CHS 147 Cancer    | -2.3867 | -4.2661 | -1.6630 | -8.0172 | -0.2009 | -14.8033 | 1.2234  | -6.2497 |
| CHS 148 Control   | -2.9790 | -5.0394 | -1.3207 | -7.1422 | 0.8198  | -14.6984 | 1.9530  | -6.0275 |
| CHS 149 Control   | -2.9720 | -4.8989 | -1.6216 | -7.1211 | 1.1918  | -14.8840 | -0.0366 | -6.0866 |
| CHS 150 Cancer    | -2.6523 | -3.4563 | -1.3308 | -6.8055 | 0.4927  | -14.7870 | 1.1549  | -6.1866 |
| CHS 151 Control   | -2.4239 | -4.3874 | -1.7808 | -6.8676 | 0.8458  | -15.8343 | -0.5561 | -6.9810 |
| CHS 152 Cancer    | -2.1166 | -4.4643 | -1.3192 | -6.9166 | 1.0246  | -16.7926 | 0.0925  | -6.6921 |
| CHS 153 Control   | -2.4746 | -5.2919 | -0.9505 | -7.0927 | 0.4030  | -15.9728 | -0.2328 | -6.9451 |
| CHS 154 Cancer    | -2.1973 | -4.2687 | -1.1964 | -6.8196 | 1.0119  | -15.2593 | -0.4564 | -5.7543 |
| CHS 155 Cancer    | -2.2317 | -4.1417 | -0.4919 | -7.0626 | 2.2184  | -14.0328 | 0.2605  | -5.5943 |
| CHS 156 Control   | -1.8448 | -3.6819 | -0.2836 | -7.1985 | 1.0606  | -14.6523 | -0.2478 | -5.9131 |
| CHS 157 Cancer    | -2.7537 | -5.2256 | -1.0026 | -7.8530 | -0.0327 | -16.1035 | -0.2452 | -6.7886 |
| CHS 158 Control   | -2.0518 | -4.6448 | -1.1255 | -6.8016 | 1.3125  | -14.6599 | -0.3985 | -5.5541 |
| CHS 159 Cancer    | -2.2311 | -4.5934 | -0.4105 | -6.9929 | 0.2694  | -15.7608 | -0.0884 | -6.1540 |
| CHS 160 Control   | -2.3801 | -4.8911 | -1.1511 | -7.8916 | -0.6551 | -15.6883 | 0.5737  | -6.4350 |
| EDRN 1 Early CRC  |         |         | 0.9900  | 0.4301  | 0.5120  | 1.0393   |         | -0.0478 |
| EDRN 2 Early CRC  |         | 0.3363  |         | -2.4095 | -1.2715 |          |         | -0.8321 |
| EDRN 3 Early CRC  |         | -0.1408 |         | -0.5641 | 2.7348  | 1.0960   |         | 1.9116  |
| EDRN 4 Early CRC  |         | -0.3582 |         | 0.2364  | 1.9617  | 1.8415   |         | 0.9850  |
| EDRN 5 Late CRC   |         | 0.2509  |         | 0.7267  | 2.1058  | 0.7998   |         | 0.9756  |
| EDRN 6 Late CRC   |         | 0.6794  |         | 0.3327  | 1.1670  | 0.5324   |         | 1.1877  |
| EDRN 7 Late CRC   |         | 1.0431  | 2.7021  | 1.3710  | 2.0238  | 1.2812   |         | 2.0223  |
| EDRN 8 Late CRC   |         | 0.2697  | 1.9962  | 1.0241  | 0.4063  | 0.3430   |         | 0.1664  |
| EDRN 9 A-Adenoma  |         | 0.3691  | -1.0968 | 0.3983  | 0.5691  | 0.6293   |         | 0.2698  |
| EDRN 10 A-Adenoma |         | 0.5731  | 1.0889  | -0.3335 | 2.9947  | 0.9101   |         | 0.3369  |
| EDRN 11 A-Adenoma |         | 3.5346  | 1.6685  | 2.0620  | 1.6547  | 1.3859   |         | -0.3843 |
| EDRN 12 A-Adenoma |         | 0.0103  | 1.7400  | 0.0783  | 1.7840  | 0.3079   |         | 1.6518  |
| EDRN 13 Adenomas  |         | -1.2629 | 0.3150  | -0.1776 | 1.8705  | -0.3343  |         |         |
| EDRN 14 Adenomas  |         | 3.0815  | 0.4239  | 1.6020  | 3.3886  | 0.2640   |         | 0.9362  |
| EDRN 15 Adenomas  |         | 1.4941  | 0.2260  | 0.6393  | 1.6041  | 0.1128   |         |         |
| EDRN 16 Adenomas  |         | 1.9680  | 0.2300  | 0.0760  |         | 0.7141   |         | 0.4315  |
| EDRN 17 Sv normal |         | 1.0150  | 0.6485  | 1.3257  | 0.8017  | 0.8798   |         | 0.9061  |
| EDRN 18 Sv normal |         | 1.3299  | 0.2896  | 0.8460  | 0.5059  | 0.5638   |         | 0.9719  |

| Sample ID         | Status    | ALCAM | ANGPT1  | ANKRD6  | ANXA5   | BAG4    | BATF    | BIN1 | BIRC3   |
|-------------------|-----------|-------|---------|---------|---------|---------|---------|------|---------|
| Confirmed in EDRN |           |       | v       | v       | v       | v       |         |      | v       |
| EDRN 19           | Sv normal |       | 0.2709  | 0.2033  | 0.1813  | 0.7019  | -0.4302 |      | 0.4427  |
| EDRN 20           | Sv normal |       | 1.9914  | 0.6490  | 0.6240  | -0.1817 | -0.0157 |      | -0.4929 |
| EDRN 21           | Sc normal |       | 0.4071  | -0.3168 | 0.7531  | -0.2894 | 1.6390  |      | -0.0185 |
| EDRN 22           | Sc normal |       | -0.1921 | 0.7004  | 2.0185  | 1.5804  | 1.6942  |      | 0.7264  |
| EDRN 23           | Sc normal |       | 1.1322  | -0.1049 | 1.9574  | 1.1290  | 1.9398  |      | 0.0584  |
| EDRN 24           | Sc normal |       | 0.7521  | -0.8108 | 0.3553  | 0.7241  | 0.5051  |      | 0.1388  |
| EDRN 25           | Early CRC |       | 0.8454  | 0.4287  | -0.3950 | 0.5844  | 0.1350  |      | 0.6748  |
| EDRN 26           | Early CRC |       | 0.4151  | 0.1355  | 0.8822  | 0.9757  | 1.8375  |      | 1.9021  |
| EDRN 27           | Early CRC |       | -2.0099 | 0.2659  | -0.1678 | 1.2820  | 0.0274  |      | -1.7200 |
| EDRN 28           | Early CRC |       | 0.9143  | 2.3830  | 1.6035  | 2.1543  | 0.8980  |      | 2.2778  |
| EDRN 29           | Late CRC  |       | 0.1866  | 1.1718  | -0.0181 | 2.3110  | 1.0956  |      | -0.6894 |
| EDRN 30           | Late CRC  |       | 1.3812  | 0.6051  | 1.2744  | 1.4584  | 0.8030  |      | 1.2230  |
| EDRN 31           | Late CRC  |       | 1.2379  | 1.0446  | 1.2315  | 1.2408  | 0.7620  |      | -0.0601 |
| EDRN 32           | Late CRC  |       |         |         | -0.3961 | 1.7141  |         |      | 0.3607  |
| EDRN 33           | A-Adenoma |       | 0.9226  | -0.6634 | 0.4765  | 1.2645  | 0.3626  |      | 1.8611  |
| EDRN 34           | A-Adenoma |       | 0.8724  | 0.5848  | 0.7527  | 0.7638  | 1.2406  |      | 0.6496  |
| EDRN 35           | A-Adenoma |       | 2.2707  | 1.8213  | 0.2465  | 1.0651  | 0.6539  |      | 0.3569  |
| EDRN 36           | A-Adenoma |       | 0.2909  | 0.4880  | 0.5751  | 2.2743  | -0.1127 |      |         |
| EDRN 37           | Adenomas  |       | 2.5073  | -0.4766 | 1.3008  | 1.4791  |         |      | 0.7498  |
| EDRN 38           | Adenomas  |       | 1.8897  | 1.2357  |         | 5.5810  | 0.6346  |      | 1.1623  |
| EDRN 39           | Adenomas  |       | 0.5416  | 2.5485  | 2.4603  | 1.8002  | 0.7407  |      | 1.4199  |
| EDRN 40           | Adenomas  |       | -4.8494 | 0.4634  | -1.8494 | 0.0921  | -0.0779 |      | -2.6265 |
| EDRN 41           | Sv normal |       | 1.0394  | 2.7458  | 1.6338  | 1.3251  |         |      | 1.2955  |
| EDRN 42           | Sv normal |       | 0.4770  | 0.3529  | 0.3442  | 1.9144  | 0.7752  |      | 2.1616  |
| EDRN 43           | Sv normal |       | 1.3560  | 0.7418  | 1.3453  | 0.2081  | 0.8613  |      | 1.3721  |
| EDRN 44           | Sv normal |       | 1.6122  | -0.2773 | 0.0037  | 0.5317  | 1.8297  |      | 0.3526  |
| EDRN 45           | Sc normal |       | 1.4245  | 1.6827  | 1.5280  | -0.3923 | 1.0215  |      | 1.0456  |
| EDRN 46           | Sc normal |       | 0.7663  | -0.3025 | -1.0221 | -0.4866 | 0.9819  |      | -1.8602 |
| EDRN 47           | Sc normal |       | 2.5138  | -2.2136 | 0.1746  | -0.2898 | 0.5004  |      | 1.0970  |
| EDRN 48           | Sc normal |       | 1.9493  | 0.0193  | 0.9046  | 1.1910  | 1.1988  |      | 0.0839  |
| EDRN 49           | Early CRC |       | 0.6591  |         | 0.8458  | 1.7849  | 1.0703  |      | 1.3428  |
| EDRN 50           | Early CRC |       | 0.0276  | -0.0845 | -0.5122 | 0.3362  | -0.6772 |      | -1.9317 |
| EDRN 51           | Early CRC |       | 0.3192  | 0.7205  | 0.7244  | 1.8656  | 0.4136  |      | 1.8119  |
| EDRN 52           | Early CRC |       | 0.7772  | 0.6350  | 0.2104  | 0.6722  | 0.9454  |      | 1.0266  |
| EDRN 53           | Late CRC  |       | 1.0326  | 1.0319  | 0.5373  | 0.8178  | 0.8449  |      | 0.5909  |
| EDRN 54           | Late CRC  |       | 1.0924  | 0.7442  | 0.9108  | 0.8127  | 0.6883  |      | 0.0907  |
| EDRN 55           | Late CRC  |       | 0.5957  | 0.4738  | 0.7975  | 2.2120  | 1.2699  |      | 0.3054  |
| EDRN 56           | Late CRC  |       | 0.7983  | 1.3137  | 0.8212  | 1.0794  | 1.1464  |      | 0.9877  |
| EDRN 57           | A-Adenoma |       | 0.6428  |         |         | 2.3150  | 0.5087  |      | 0.9186  |
| EDRN 58           | A-Adenoma |       | 1.0216  | 1.4991  | 0.8227  | 1.1834  | 0.9497  |      | 0.3979  |
| EDRN 59           | A-Adenoma |       | 0.7076  | 1.3473  | -0.1695 | 2.2405  | -0.2202 |      | 1.2946  |
| EDRN 60           | A-Adenoma |       | 1.5489  | 1.4759  | 0.9080  | 1.5776  | 1.0792  |      |         |
| EDRN 61           | Adenomas  |       |         | 0.3705  | -0.2431 | 1.6238  | 0.1400  |      | 0.9174  |
| EDRN 62           | Adenomas  |       | 1.5755  | 0.6557  | 0.3922  | 0.9672  | 1.5042  |      | 0.8683  |
| EDRN 63           | Adenomas  |       | 1.0611  | 1.0065  | 1.1607  | 1.0325  | 1.0446  |      | 0.5425  |

| Sample ID         | Status    | ALCAM | ANGPT1  | ANKRD6  | ANXA5   | BAG4    | BATF    | BIN1 | BIRC3   |
|-------------------|-----------|-------|---------|---------|---------|---------|---------|------|---------|
| Confirmed in EDRN |           |       | v       | v       | v       | v       |         |      | v       |
| EDRN 64           | Adenomas  |       | 0.7287  | 0.6267  | 0.3936  | 0.9844  | 0.8508  |      | 0.4998  |
| EDRN 65           | Sv normal |       | 0.7131  | -0.3499 | 0.9923  | 0.8285  | 0.4740  |      | 0.9057  |
| EDRN 66           | Sv normal |       | 1.2092  | 0.2054  | 0.4931  | 1.1787  | 0.7194  |      | 0.0742  |
| EDRN 67           | Sv normal |       | 1.0303  | 0.1252  | 0.5948  | 1.0835  | 0.8398  |      | -0.0958 |
| EDRN 68           | Sv normal |       | 0.4057  |         | 0.2515  | 1.4806  | 0.8032  |      | 0.2090  |
| EDRN 69           | Sc normal |       | 0.2985  | 0.3350  | 0.1788  | 1.5414  | 1.1468  |      | 0.4110  |
| EDRN 70           | Sc normal |       | 0.9035  | 0.8586  | 1.4214  | 1.7459  | 0.7755  |      |         |
| EDRN 71           | Sc normal |       | 0.8713  |         | 1.0935  | 0.5889  | 0.9010  |      | 1.0845  |
| EDRN 72           | Sc normal |       | 0.5345  |         | 0.2641  | 0.0899  | 1.2606  |      | 0.6020  |
| EDRN 73           | Early CRC |       | 0.1877  |         | 1.2859  | 2.5914  | -0.0257 |      | 1.1008  |
| EDRN 74           | Early CRC |       | 1.2714  | 1.5366  | -0.2890 | 2.1937  | 0.8667  |      | 0.5231  |
| EDRN 75           | Early CRC |       | 1.0491  | 0.8264  | 0.7150  | 0.8880  | 1.4096  |      | 0.2804  |
| EDRN 76           | Early CRC |       | 0.3741  | 1.8262  | 1.9166  | 2.7264  | 1.3517  |      | 2.2700  |
| EDRN 77           | Late CRC  |       | 0.5899  | 0.6663  | 1.0209  | 1.2792  | 0.8110  |      | 1.5217  |
| EDRN 78           | Late CRC  |       | 0.8840  | 0.9268  | 0.8022  | 1.1879  | 0.9619  |      | 1.6477  |
| EDRN 79           | Late CRC  |       | 1.1554  | 0.9083  | 1.4672  | 1.8042  | 0.9421  |      | 1.4602  |
| EDRN 80           | Late CRC  |       | 1.2447  | -5.3626 | 0.5577  | 0.6742  | 1.6549  |      | 1.0914  |
| EDRN 81           | A-Adenoma |       | 1.0888  | 1.7198  | 0.9816  | 1.7869  | 1.6866  |      | 0.8254  |
| EDRN 82           | A-Adenoma |       | 1.5227  | -0.0009 | 1.4279  | 4.2585  | 1.9068  |      | 0.4394  |
| EDRN 83           | A-Adenoma |       | 1.0032  | 2.2322  | 0.5791  | 2.7562  | 1.1177  |      | 1.1929  |
| EDRN 84           | A-Adenoma |       | 0.4769  | 0.7345  | 0.1859  | 0.2367  | 0.8851  |      | -0.3689 |
| EDRN 85           | Adenomas  |       | 1.1955  | 1.1354  | 0.8005  | 1.6554  | 1.1758  |      | 1.1429  |
| EDRN 86           | Adenomas  |       | 1.2296  | 1.8098  | 1.2221  | 1.2946  | 1.2933  |      | 1.4395  |
| EDRN 87           | Adenomas  |       | 0.9634  | 1.1787  | 0.9709  | 0.2122  | 1.1491  |      | 1.6620  |
| EDRN 88           | Adenomas  |       | 0.8747  | 4.3322  | 1.3932  | 2.9967  | 1.1341  |      | 1.2054  |
| EDRN 89           | Sv normal |       | 0.1924  | -1.6050 | -0.6985 | -0.2719 | -0.4735 |      | -0.2609 |
| EDRN 90           | Sv normal |       | 0.9693  | -0.0013 | 0.6444  | 0.9326  | 1.1997  |      | 0.2155  |
| EDRN 91           | Sv normal |       | 0.8968  | 0.5494  | 0.2910  | 0.2894  | 0.7082  |      | 1.0121  |
| EDRN 92           | Sv normal |       | 0.6523  | 0.2539  | 1.2962  |         | 0.5916  |      | 0.6398  |
| EDRN 93           | Sc normal |       | 0.0510  | 0.6927  | -0.0141 | 0.0503  | 0.3649  |      | 0.5399  |
| EDRN 94           | Sc normal |       | 1.3043  | -0.0086 | 0.0348  | 0.9277  | -0.0723 |      | -2.1159 |
| EDRN 95           | Sc normal |       | 1.4055  | 0.6691  | 0.9331  | 0.2102  | 1.2984  |      | 0.2356  |
| EDRN 96           | Sc normal |       | -1.2306 | -0.2347 | -3.9713 | -1.2629 | -3.4588 |      | -3.8632 |
| EDRN 97           | Early CRC |       | 0.6651  | 0.9801  | 1.1032  | 2.2747  | 0.9361  |      | 1.0926  |
| EDRN 98           | Early CRC |       |         | 1.5300  | 1.3280  | 2.9744  | 0.7768  |      | 2.1719  |
| EDRN 99           | Early CRC |       | 0.6698  | 2.3613  | 1.8683  | 3.1072  | 0.9799  |      | -0.4916 |
| EDRN 100          | Early CRC |       | 0.8333  | 0.1936  | 0.9773  | 1.0596  | 1.0121  |      | 0.9989  |
| EDRN 101          | Late CRC  |       | -0.3304 | 0.2284  | 0.8933  | 0.6928  | 0.2333  |      | 1.2585  |
| EDRN 102          | Late CRC  |       | 1.0039  | 0.9368  | 1.0593  | 1.6572  | 1.2795  |      | 1.3334  |
| EDRN 103          | Late CRC  |       | 0.7653  | 0.0435  | 0.6760  | -0.1515 | 0.4135  |      | -0.4808 |
| EDRN 104          | Late CRC  |       | 0.0680  | 0.3226  | 0.7180  | 1.1054  | 0.1041  |      | 0.0411  |
| EDRN 105          | A-Adenoma |       | 1.2118  | 1.4015  | 1.2800  | 1.0030  | 1.0616  |      | 0.9523  |
| EDRN 106          | A-Adenoma |       | 0.4244  |         | 1.0127  | 2.4395  | 0.5519  |      | 1.3973  |
| EDRN 107          | A-Adenoma |       | 0.6439  | 0.1515  | 0.7432  | 0.2426  | 0.3778  |      | 0.7431  |
| EDRN 108          | A-Adenoma |       | 1.1421  | 1.2160  | 1.3144  | 2.0307  | 0.6235  |      | 1.0783  |

| Sample ID         | Status    | ALCAM | ANGPT1  | ANKRD6  | ANXA5   | BAG4    | BATF    | BIN1 | BIRC3   |
|-------------------|-----------|-------|---------|---------|---------|---------|---------|------|---------|
| Confirmed in EDRN |           |       | v       | v       | v       | v       | v       | v    | v       |
| EDRN 109          | Adenomas  |       | 1.5405  | 0.5763  | 1.1204  | 1.7908  | 0.6685  |      | 0.6008  |
| EDRN 110          | Adenomas  |       | 0.9430  | 0.7179  | -0.1912 | 1.5145  | 0.2426  |      | -0.3130 |
| EDRN 111          | Adenomas  |       | 0.6713  | 0.6912  | 0.3398  | 3.0021  | 0.8811  |      | 1.7959  |
| EDRN 112          | Adenomas  |       | 0.6800  | -0.6686 | -3.2130 | 1.6260  | 1.6774  |      | -2.5536 |
| EDRN 113          | Sv normal |       | 0.5992  | 0.7225  | 0.3993  | 0.9554  | 0.6322  |      | 0.2843  |
| EDRN 114          | Sv normal |       | 1.8779  | 1.4863  | 0.1430  | 1.1332  | 1.1824  |      | 0.9322  |
| EDRN 115          | Sv normal |       |         | 0.6082  | 0.2624  | 0.5138  | 0.9914  |      | 0.8301  |
| EDRN 116          | Sv normal |       | 0.6525  | 0.2534  | 0.1290  | -0.1093 | 0.2915  |      | 0.6252  |
| EDRN 117          | Sc normal |       | 1.1066  | 0.1213  | 0.4196  | 0.6020  | 1.1474  |      | 0.8591  |
| EDRN 118          | Sc normal |       | 0.7875  | 0.6084  | 0.6136  | 0.7122  | 0.7812  |      | 0.5647  |
| EDRN 119          | Sc normal |       | 1.1224  | 0.1902  | 0.6415  | -0.1581 | 0.8835  |      | 0.2363  |
| EDRN 120          | Sc normal |       | 0.6530  | 0.1129  | -0.0846 | 0.0243  |         |      | -0.1203 |
| EDRN 121          | Early CRC |       | 1.7905  | 1.5023  | 1.5672  | 1.8287  | 1.9543  |      | 1.4283  |
| EDRN 122          | Early CRC |       | 1.2219  | 0.1443  | 0.1912  | 0.0602  | 0.7299  |      | -0.4564 |
| EDRN 123          | Early CRC |       | 0.7497  | 1.5540  | 0.8238  | 0.6164  | 1.3501  |      | 1.1951  |
| EDRN 124          | Early CRC |       | 1.1739  | 0.1776  | 0.5695  | 0.8219  | 0.2813  |      | 0.7857  |
| EDRN 125          | Late CRC  |       | 0.2773  | 1.2476  | 0.9710  | 1.4440  | 0.6149  |      | 1.5773  |
| EDRN 126          | Late CRC  |       | 0.2925  | 0.1958  | 0.5466  | 0.8349  | 0.9580  |      | 0.0053  |
| EDRN 127          | Late CRC  |       | 1.1687  | 0.8078  | 0.4507  | 1.8899  | 1.0119  |      | 0.9018  |
| EDRN 128          | Late CRC  |       | 0.4177  | 1.2850  | 1.7452  | 2.1859  | 0.8323  |      | 1.3730  |
| EDRN 129          | A-Adenoma |       | 1.5331  | 1.2760  | 1.5792  | 1.1925  | 0.6081  |      | 2.1085  |
| EDRN 130          | A-Adenoma |       | 0.0458  | 0.6710  | 1.1861  | 1.8546  | 0.4765  |      | 0.1694  |
| EDRN 131          | A-Adenoma |       | 0.9233  | 1.3340  | 1.1456  | 1.9149  | 0.6787  |      | 1.6270  |
| EDRN 132          | A-Adenoma |       | 0.6472  | 0.9927  | 0.8519  | 1.6657  | 1.0819  |      | 0.9808  |
| EDRN 133          | Adenomas  |       | 0.0786  | -0.0140 | -0.0956 | 0.1266  | 0.5004  |      | 0.4361  |
| EDRN 134          | Adenomas  |       | -0.1514 | 0.2094  |         | 1.2301  | 0.3257  |      | 0.7156  |
| EDRN 135          | Adenomas  |       | 1.4744  |         | 1.1374  | 1.7436  | 0.0666  |      | 0.9011  |
| EDRN 136          | Adenomas  |       | 0.7935  | -1.0623 | 0.8261  |         | -1.4212 |      | 0.2041  |
| EDRN 137          | Sv normal |       | 0.3157  | 0.7918  | 0.0952  | 0.8204  | 0.7986  |      | 0.1250  |
| EDRN 138          | Sv normal |       | 0.1978  |         | -0.2370 | 0.5122  | 0.1976  |      | -0.6772 |
| EDRN 139          | Sv normal |       | -0.2680 | 2.1637  | 0.0765  | 1.1120  | -0.2212 |      | 0.0543  |
| EDRN 140          | Sv normal |       | -0.7616 | 1.2649  | 0.2689  | 1.6943  | 1.7596  |      | 0.8170  |
| EDRN 141          | Sc normal |       |         | 1.1568  | 0.2392  | 0.2876  | 0.9850  |      | -0.3249 |
| EDRN 142          | Sc normal |       | 3.6372  | 0.6611  | -1.5368 | 2.7332  | 4.1195  |      | 0.0814  |
| EDRN 143          | Sc normal |       | 1.1024  | 0.9516  |         | 1.2511  | 0.4902  |      | -0.1207 |
| EDRN 144          | Sc normal |       | 1.8687  | -2.8540 | 0.1212  | 0.6567  | 0.3004  |      | -0.0708 |
| EDRN 145          | Early CRC |       | -0.0622 | 1.5084  | 0.2657  | 2.6144  | 0.1786  |      | 1.0573  |
| EDRN 146          | Early CRC |       | 2.0048  | 0.2696  | 0.0985  | -0.2753 | 1.7617  |      | 0.9912  |
| EDRN 147          | Early CRC |       | 0.8307  | 1.4314  | 1.4284  | 2.6914  | 0.4376  |      | 2.0986  |
| EDRN 148          | Early CRC |       | 1.3424  | 1.0495  | 1.3888  | 1.6861  | 0.5364  |      | 0.9821  |
| EDRN 149          | Late CRC  |       | 0.8328  | 0.1528  | 1.0384  | 1.3730  | 0.9183  |      | 0.2081  |
| EDRN 150          | Late CRC  |       | 0.9430  | 1.4907  | 1.1174  | 1.8541  | 0.7545  |      | 0.7265  |
| EDRN 151          | Late CRC  |       | 0.9081  |         | 1.4691  | 2.3968  | 0.5453  |      | 1.3690  |
| EDRN 152          | Late CRC  |       | 0.8332  | 2.3173  |         | 1.0494  | 0.5417  |      | -0.1180 |
| EDRN 153          | A-Adenoma |       | 1.3171  | -0.6514 | 0.0831  | 0.8740  | 0.5926  |      | -0.1802 |

| Sample ID         | Status    | ALCAM | ANGPT1  | ANKRD6  | ANXA5   | BAG4    | BATF    | BIN1 | BIRC3   |
|-------------------|-----------|-------|---------|---------|---------|---------|---------|------|---------|
| Confirmed in EDRN |           |       |         | v       |         | v       |         |      | v       |
| EDRN 154          | A-Adenoma |       | 0.4108  |         | 0.4442  | 1.8635  | 1.4242  |      | 0.8272  |
| EDRN 155          | A-Adenoma |       | 1.6556  | 2.2597  | 1.0987  | 1.8958  | 0.4422  |      | 1.0235  |
| EDRN 156          | A-Adenoma |       | 1.1231  | -0.4868 | 0.3617  | 1.4364  | 1.2671  |      | 0.3682  |
| EDRN 157          | Adenomas  |       | -0.4604 | 0.7319  | 0.5941  | 2.4975  | 1.0523  |      | 0.6459  |
| EDRN 158          | Adenomas  |       | 1.7789  | 1.5243  | 2.4972  | 3.2194  | 1.1266  |      | 1.7602  |
| EDRN 159          | Adenomas  |       | 0.6874  | 0.1149  | -0.5358 | 1.5431  |         |      |         |
| EDRN 160          | Adenomas  |       | 0.5587  | 0.0210  | -0.3649 | 0.6516  | 0.3512  |      | 0.7209  |
| EDRN 161          | Sv normal |       | -0.6683 | -0.7064 | 0.4067  | 0.7834  | -0.3057 |      | -0.2757 |
| EDRN 162          | Sv normal |       | 0.8584  | 0.3856  | -0.7447 | -0.7062 | 1.0757  |      | -0.0477 |
| EDRN 163          | Sv normal |       | 1.3204  | -0.5066 | 0.1140  | 0.4343  | -0.5311 |      | -0.3523 |
| EDRN 164          | Sv normal |       | 1.3201  | 0.0414  | 0.0135  | -0.0471 | 1.0912  |      | -0.3935 |
| EDRN 165          | Sc normal |       | 0.9964  | 0.5368  | 0.1321  | -0.6252 | 1.1537  |      |         |
| EDRN 166          | Sc normal |       | 0.3105  | 1.4364  | 0.2579  | 1.6081  | 2.1037  |      |         |
| EDRN 167          | Sc normal |       | -0.1435 | 0.0862  | 0.8289  | 0.5974  | 0.8377  |      | 0.3346  |
| EDRN 168          | Sc normal |       | 0.6543  | 0.9680  | 0.8962  | 0.6268  | 0.3435  |      | 0.8716  |
| EDRN 169          | Early CRC |       | 1.2853  | 1.4532  | 1.2192  | 1.4423  | 0.8649  |      | 2.2419  |
| EDRN 170          | Early CRC |       | 0.8823  | 0.6213  | 0.0543  | 0.4689  | 0.7868  |      | 0.4244  |
| EDRN 171          | Late CRC  |       | 0.6929  | 1.3143  | -0.1430 | 2.0870  | 0.4003  |      | 1.3233  |
| EDRN 172          | Late CRC  |       | 0.5629  | 0.3717  | 1.6249  | 2.7292  | 0.8088  |      | 1.4433  |
| EDRN 173          | A-Adenoma |       | 0.9472  | 0.7681  | 0.3999  | 0.7426  | 1.6004  |      | 0.0483  |
| EDRN 174          | A-Adenoma |       | 0.9246  | 0.8998  | 1.4985  | 1.1271  |         |      | -1.0764 |
| EDRN 175          | Adenomas  |       | 1.1576  | -0.9402 | 0.1521  | 1.2969  | 1.2542  |      | 0.4439  |
| EDRN 176          | Adenomas  |       | 1.0481  | 0.9168  | 0.6099  | 2.0523  | 0.3985  |      | 0.7072  |
| EDRN 177          | Sv normal |       | 1.2487  | 1.7702  | 1.0897  | 1.5764  | 0.7834  |      | 1.3839  |
| EDRN 178          | Sv normal |       | 0.1998  | 1.0694  | 0.0229  | 0.7926  | 0.4374  |      | 0.7714  |
| EDRN 179          | Sc normal |       | -0.4720 | -1.0158 | -0.5783 | -0.5520 | 0.1367  |      | -0.7223 |
| EDRN 180          | Sc normal |       | 1.1988  | 0.5691  | 0.8266  | 1.2580  | 0.9879  |      | -0.0704 |



| Sample ID         | Status  | BRCA1    | BRCA2   | BTG1   | CC2D1A  | CCNB2   | CCND3   | CD4     |
|-------------------|---------|----------|---------|--------|---------|---------|---------|---------|
| Confirmed in EDRN |         | v        |         | v      | v       |         |         | v       |
| CHS 1             | Control | -11.8264 | 4.4793  | 4.6903 | -5.9782 | 17.6173 | -5.3814 | -0.2663 |
| CHS 2             | Cancer  | -12.8817 | 3.1494  | 4.1423 | -5.1041 | 15.1995 | -4.1350 | 0.1066  |
| CHS 3             | Cancer  | -12.7445 | 3.6335  | 5.0101 | -5.8492 | 18.0427 | -5.6548 | -1.2031 |
| CHS 4             | Control | -13.1021 | 2.0746  | 3.0568 | -6.8232 | 16.4415 | -5.2568 | -0.0482 |
| CHS 5             | Control | -14.1785 | 2.8997  | 4.5699 | -6.2759 | 14.2176 | -4.9063 | -1.6993 |
| CHS 6             | Cancer  | -13.2086 | 3.0177  | 4.1179 | -6.7010 | 13.8015 | -4.0898 | 1.2197  |
| CHS 7             | Control | -12.3409 | 2.0880  | 3.2154 | -5.3743 | 13.9426 | -5.9289 | -1.1573 |
| CHS 8             | Cancer  | -13.6797 | 3.6715  | 3.8465 | -5.1594 | 14.8881 | -4.2838 | 0.8345  |
| CHS 9             | Cancer  | -12.3513 | 3.0233  | 4.1086 | -5.7864 | 14.4255 | -5.2976 | -0.5281 |
| CHS 10            | Control | -12.4067 | 3.0475  | 3.9199 | -5.5595 | 14.5818 | -3.5389 | 0.4004  |
| CHS 11            | Control | -16.2866 | 0.6610  | 3.2305 | -7.4834 | 12.5256 | -5.2789 | -1.3917 |
| CHS 12            | Cancer  | -12.9779 | 2.9882  | 3.0332 | -6.5484 | 14.1440 | -4.2223 | 0.9073  |
| CHS 13            | Cancer  | -13.2701 | 4.8224  | 4.4063 | -4.9256 | 15.4828 | -3.1218 | -0.2246 |
| CHS 14            | Control | -12.7852 | 4.0140  | 3.6490 | -5.2604 | 14.5724 | -4.3361 | 0.0342  |
| CHS 15            | Control | -13.2605 | 3.6502  | 4.1777 | -4.7046 | 14.9791 | -4.0955 | -0.4731 |
| CHS 16            | Cancer  | -11.9901 | 3.5442  | 3.8833 | -5.1834 | 14.3926 | -3.9069 | 0.0786  |
| CHS 17            | Cancer  | -12.5930 | 4.8186  | 4.6446 | -2.7589 | 15.4044 | -4.6815 | -0.7119 |
| CHS 18            | Control | -14.3417 | 4.4589  | 4.5345 | -3.9515 | 15.1358 | -4.0863 | -1.7464 |
| CHS 19            | Cancer  | -13.0544 | 3.6747  | 3.4100 | -5.5411 | 15.1178 | -3.8179 | 0.1859  |
| CHS 20            | Control | -14.1983 | 2.2799  | 2.2474 | -7.2929 | 13.7147 | -6.4466 | -0.2492 |
| CHS 21            | Cancer  | -13.2346 | 4.2440  | 4.9097 | -3.1073 | 15.7045 | -3.9388 | 0.6934  |
| CHS 22            | Control | -13.0810 | 2.5593  | 2.0986 | -3.0625 | 14.1140 | -5.6729 | 0.5507  |
| CHS 23            | Cancer  | -13.0788 | 4.4488  | 4.6011 | -4.3256 | 15.7107 | -5.6503 | -0.2240 |
| CHS 24            | Control | -17.7919 | -0.9356 | 1.9675 | -6.4837 | 13.4120 | -9.0072 | -0.1163 |
| CHS 25            | Cancer  | -12.4403 | 3.8037  | 3.2486 | -6.6413 | 14.5386 | -4.5909 | 1.0187  |
| CHS 26            | Control | -13.1876 | 3.7361  | 3.3666 | -5.8370 | 15.6444 | -6.2243 | 0.3033  |
| CHS 27            | Cancer  | -13.2018 | 3.0097  | 3.2523 | -5.9366 | 14.8249 | -3.9953 | -1.2633 |
| CHS 28            | Control | -12.6543 | 3.6782  | 4.9339 | -5.0372 | 16.1692 | -5.1834 | 1.1469  |
| CHS 29            | Cancer  | -13.0109 | 3.3656  | 3.8009 | -5.9329 | 15.1183 | -4.8902 | 1.0295  |
| CHS 30            | Control | -13.7406 | 3.0210  | 3.6288 | -5.4765 | 15.3918 | -3.4830 | -1.1889 |
| CHS 31            | Control | -13.0558 | 3.9967  | 3.6641 | -4.7801 | 15.1940 | -5.1027 | 0.4445  |
| CHS 32            | Cancer  | -13.5890 | 3.1804  | 3.8133 | -5.2767 | 14.3757 | -4.8351 | -0.5837 |
| CHS 33            | Cancer  | -13.5109 | 4.0172  | 4.4653 | -4.3673 | 15.3278 | -4.1123 | -0.5006 |
| CHS 34            | Control | -13.8473 | 3.4893  | 3.3206 | -6.0206 | 14.3205 | -5.0235 | -0.4585 |
| CHS 35            | Control | -14.0503 | 1.9510  | 2.9262 | -6.6372 | 13.9521 | -5.6906 | 0.5649  |
| CHS 36            | Cancer  | -13.7553 | 2.5720  | 3.8457 | -5.6876 | 14.6933 | -5.9768 | -0.3756 |
| CHS 37            | Cancer  | -12.1737 | 3.2617  | 3.3997 | -5.4289 | 15.0589 | -4.2654 | 0.8967  |
| CHS 38            | Control | -13.8858 | 3.0478  | 3.2083 | -5.1545 | 14.6736 | -4.3472 | -0.0824 |
| CHS 39            | Control | -15.0530 | 2.4498  | 3.2146 | -5.0028 | 14.2724 | -4.9569 | -0.5591 |
| CHS 40            | Cancer  | -12.4037 | 3.0836  | 4.0964 | -5.5464 | 14.8589 | -4.7678 | -0.6483 |
| CHS 41            | Control | -14.0090 | 2.7238  | 3.4361 | -4.7060 | 14.8071 | -5.8970 | -0.9725 |
| CHS 42            | Cancer  | -13.1395 | 2.6775  | 3.4091 | -5.3506 | 13.6028 | -5.2617 | -1.3998 |
| CHS 43            | Control | -13.6820 | 3.1549  | 5.0498 | -5.7738 | 15.1343 | -4.9904 | -1.8272 |
| CHS 44            | Cancer  | -13.4149 | 2.6672  | 4.2000 | -5.2193 | 15.2645 | -4.6795 | -0.3011 |
| CHS 45            | Control | -13.6552 | 2.9219  | 4.0261 | -5.4977 | 15.1035 | -4.4324 | -0.0473 |

| Sample ID         | Status  | BRCA1    | BRCA2   | BTG1   | CC2D1A  | CCNB2   | CCND3   | CD4     |
|-------------------|---------|----------|---------|--------|---------|---------|---------|---------|
| Confirmed in EDRN |         | v        |         | v      | v       |         |         | v       |
| CHS 46            | Cancer  | -12.6911 | 4.3780  | 5.2534 | -3.9767 | 15.3988 | -4.4116 | -0.1711 |
| CHS 47            | Cancer  | -13.7559 | 3.0761  | 4.6382 | -4.7516 | 14.8999 | -4.7602 | -0.2281 |
| CHS 48            | Control | -12.7563 | 3.0497  | 3.2729 | -5.2014 | 14.9431 | -4.8583 | 0.1748  |
| CHS 49            | Cancer  | -13.7668 | 2.5126  | 2.8273 | -5.6839 | 14.7664 | -5.1671 | 0.6716  |
| CHS 50            | Control | -13.2185 | 3.5139  | 4.1956 | -6.1866 | 14.9797 | -5.2593 | -0.0784 |
| CHS 51            | Cancer  | -13.9928 | 3.0368  | 3.0010 | -5.6826 | 14.8135 | -4.7642 | 0.2950  |
| CHS 52            | Control | -14.1067 | 3.3153  | 3.0281 | -6.0723 | 14.4750 | -5.0311 | -0.1095 |
| CHS 53            | Control | -13.3420 | 4.4299  | 2.7382 | -5.9516 | 14.7022 | -4.6333 | -0.1602 |
| CHS 54            | Cancer  | -13.1050 | 3.4197  | 3.4818 | -6.2973 | 14.9062 | -4.4335 | 1.3226  |
| CHS 55            | Cancer  | -14.0148 | 3.3562  | 2.4279 | -5.2596 | 15.1892 | -6.1665 | -0.2640 |
| CHS 56            | Control | -13.0622 | 3.5666  | 3.6660 | -6.4553 | 15.3968 | -4.8145 | -0.3946 |
| CHS 57            | Control | -12.7090 | 3.4981  | 2.9991 | -4.8941 | 15.6080 | -5.0011 | 0.0242  |
| CHS 58            | Cancer  | -13.2577 | 3.6975  | 2.7448 | -5.3551 | 15.4267 | -5.8812 | 0.1236  |
| CHS 59            | Cancer  | -13.1687 | 4.0753  | 3.7598 | -2.4650 | 14.5859 | -6.2890 | -0.0443 |
| CHS 60            | Control | -12.3544 | 3.7092  | 4.0966 | -3.6246 | 15.2850 | -6.9140 | 0.2222  |
| CHS 61            | Cancer  | -13.5373 | 2.6231  | 4.4622 | -5.2645 | 13.9767 | -4.3021 | -0.8877 |
| CHS 62            | Control | -14.6510 | 1.6982  | 2.3982 | -5.5250 | 14.6191 | -5.3735 | -0.3812 |
| CHS 63            | Cancer  | -11.9038 | 3.5372  | 6.1828 | -5.0634 | 15.5773 | -3.8751 | -0.6718 |
| CHS 64            | Control | -13.3634 | 2.3102  | 2.8974 | -6.6722 | 13.9044 | -3.6784 | -1.0740 |
| CHS 65            | Cancer  | -11.4242 | 3.1920  | 5.6922 | -5.4923 | 15.4107 | -2.7453 | -0.3821 |
| CHS 66            | Control | -11.5294 | 3.9649  | 5.4757 | -4.9373 | 13.8930 | -4.8650 | 0.2976  |
| CHS 67            | Control | -14.9644 | -0.1195 | 3.0088 | -6.1528 | 13.5509 | -5.0500 | -0.2096 |
| CHS 68            | Cancer  | -14.4915 | 2.7581  | 4.3322 | -5.3854 | 14.4663 | -4.0136 | -0.6829 |
| CHS 69            | Cancer  | -13.2698 | 3.4452  | 4.3348 | -5.9509 | 15.6318 | -3.1854 | -0.2132 |
| CHS 70            | Control | -12.8654 | 3.3102  | 3.4054 | -5.3725 | 15.1504 | -3.7251 | -0.5350 |
| CHS 71            | Cancer  | -14.0527 | 3.8028  | 4.6776 | -4.6592 | 15.7569 | -4.7275 | 0.2142  |
| CHS 72            | Control | -14.5126 | 3.6596  | 5.6376 | -4.8369 | 15.4964 | -6.8404 | -2.1108 |
| CHS 73            | Control | -14.5946 | 1.9146  | 1.8775 | -5.8899 | 13.6026 | -6.5605 | 0.3621  |
| CHS 74            | Cancer  | -12.3142 | 4.0166  | 5.7916 | -5.5993 | 16.2913 | -4.3086 | -1.0801 |
| CHS 75            | Cancer  | -13.7593 | 3.7917  | 4.3672 | -7.6175 | 14.8377 | -5.0710 | 1.0326  |
| CHS 76            | Control | -14.0615 | 2.2310  | 3.5796 | -5.6083 | 14.2373 | -4.3154 | -0.3928 |
| CHS 77            | Control | -13.9255 | 2.9441  | 2.7071 | -7.5234 | 15.1174 | -4.7312 | -1.1472 |
| CHS 78            | Cancer  | -13.5907 | 3.3544  | 4.5165 | -4.8851 | 15.8804 | -4.8805 | -0.0530 |
| CHS 79            | Cancer  | -13.7216 | 3.6927  | 4.9457 | -5.9714 | 15.2678 | -5.4032 | 1.5571  |
| CHS 80            | Control | -12.2959 | 3.4094  | 5.0067 | -5.7723 | 14.2168 | -5.8738 | 0.8607  |
| CHS 81            | Control | -14.2829 | 3.2647  | 4.2950 | -6.4087 | 14.9521 | -4.0994 | 0.2055  |
| CHS 82            | Cancer  | -14.1544 | 4.1447  | 2.8802 | -4.9802 | 15.5353 | -4.3714 | -0.0585 |
| CHS 83            | Cancer  | -13.1771 | 4.0738  | 4.3119 | -6.1150 | 15.2406 | -3.3155 | 1.3412  |
| CHS 84            | Control | -12.9686 | 4.0588  | 2.6188 | -6.2467 | 13.6336 | -5.1841 | -0.1469 |
| CHS 85            | Cancer  | -13.0278 | 3.4823  | 4.0722 | -4.4724 | 14.9022 | -4.0664 | -1.0232 |
| CHS 86            | Control | -13.8926 | 2.7427  | 2.8839 | -5.2315 | 14.3850 | -5.0444 | -1.3073 |
| CHS 87            | Control | -13.1057 | 2.5393  | 3.4722 | -5.6584 | 12.5598 | -4.7534 | 0.4351  |
| CHS 88            | Cancer  | -13.4325 | 2.1540  | 3.9569 | -5.1818 | 15.2045 | -4.9812 | 0.5731  |
| CHS 89            | Control | -13.6903 | 3.5077  | 3.8883 | -4.7240 | 15.1432 | -4.4240 | -0.7861 |
| CHS 90            | Cancer  | -12.4466 | 3.1061  | 4.8901 | -3.4457 | 15.2948 | -4.7282 | -0.4233 |

| Sample ID Status  | BRCA1    | BRCA2  | BTG1   | CC2D1A  | CCNB2   | CCND3   | CD4     |
|-------------------|----------|--------|--------|---------|---------|---------|---------|
| Confirmed in EDRN | v        |        | v      | v       |         |         | v       |
| CHS 91 Cancer     | -13.1788 | 2.8113 | 3.6259 | -5.3447 | 15.0474 | -5.8659 | -0.5946 |
| CHS 92 Control    | -13.1512 | 2.8684 | 3.8072 | -3.6911 | 15.0249 | -6.1161 | -1.1908 |
| CHS 93 Control    | -13.1505 | 2.7661 | 3.2695 | -5.4108 | 15.0175 | -4.8162 | -1.0343 |
| CHS 94 Cancer     | -13.0570 | 2.8904 | 3.8537 | -5.2007 | 15.1224 | -4.7289 | 0.0582  |
| CHS 95 Control    | -12.4423 | 3.2721 | 3.5978 | -4.0873 | 15.6214 | -4.8009 | -1.3697 |
| CHS 96 Cancer     | -13.2429 | 3.2760 | 3.2554 | -4.1743 | 15.4325 | -4.2961 | -0.8461 |
| CHS 97 Cancer     | -12.4765 | 3.6185 | 4.1742 | -5.7688 | 14.7431 | -5.0560 | 0.2160  |
| CHS 98 Control    | -16.1115 | 1.1267 | 3.2636 | -5.7208 | 13.6522 | -5.1913 | -1.9119 |
| CHS 99 Cancer     | -13.4163 | 2.7921 | 4.1212 | -4.6705 | 14.9926 | -5.1881 | -0.3396 |
| CHS 100 Control   | -12.6986 | 3.2831 | 2.1755 | -5.5620 | 15.5773 | -5.6176 | 0.0314  |
| CHS 101 Cancer    | -13.5111 | 3.5638 | 4.4959 | -4.3800 | 16.7326 | -5.2495 | 0.4569  |
| CHS 102 Control   | -13.1869 | 4.0375 | 5.2131 | -4.1511 | 16.0164 | -5.4477 | 0.8552  |
| CHS 103 Cancer    | -14.1826 | 3.6065 | 4.8757 | -3.7389 | 15.3043 | -4.2852 | -0.5758 |
| CHS 104 Control   | -13.0496 | 2.8760 | 3.1070 | -5.3521 | 14.8520 | -6.2145 | -1.2912 |
| CHS 105 Cancer    | -12.9522 | 3.3190 | 4.4019 | -5.2157 | 14.6951 | -5.0819 | -0.5841 |
| CHS 106 Control   | -14.3938 | 3.2558 | 3.1437 | -5.1860 | 14.8885 | -2.7223 | -1.2612 |
| CHS 107 Cancer    | -13.6299 | 3.1488 | 4.5130 | -4.4907 | 15.5614 | -4.2095 | -0.8710 |
| CHS 108 Control   | -12.7245 | 3.7281 | 3.4956 | -5.1041 | 14.4232 | -5.5834 | 0.1828  |
| CHS 109 Control   | -13.9077 | 2.4929 | 3.2055 | -6.7289 | 14.5894 | -5.0154 | -0.1455 |
| CHS 110 Cancer    | -12.9772 | 2.7627 | 2.6600 | -6.2621 | 14.2604 | -6.5817 | -0.8248 |
| CHS 111 Control   | -13.5802 | 2.4330 | 2.8133 | -5.4454 | 14.9784 | -4.5120 | -0.6876 |
| CHS 112 Cancer    | -12.8519 | 3.3277 | 4.6816 | -6.5373 | 14.4515 | -3.3707 | 1.3024  |
| CHS 113 Control   | -12.5770 | 4.3335 | 4.7959 | -5.2179 | 15.3561 | -4.1876 | 0.1328  |
| CHS 114 Cancer    | -13.3049 | 3.3655 | 2.9228 | -5.3360 | 14.3334 | -3.7325 | -0.3507 |
| CHS 117 Control   | -13.5063 | 2.9865 | 3.4752 | -6.7494 | 13.6138 | -4.3485 | -0.4657 |
| CHS 118 Cancer    | -13.2612 | 2.9862 | 3.4480 | -4.9615 | 14.0700 | -5.3696 | 1.1782  |
| CHS 119 Cancer    | -12.8374 | 3.6557 | 4.0364 | -6.1169 | 15.4246 | -5.3155 | 0.1557  |
| CHS 120 Control   | -12.8052 | 3.2538 | 4.8293 | -5.7746 | 15.2549 | -4.7279 | 0.1884  |
| CHS 121 Control   | -13.9580 | 3.0506 | 2.5638 | -6.2114 | 14.2907 | -6.3287 | 0.3004  |
| CHS 122 Cancer    | -13.0207 | 3.8397 | 2.9330 | -5.3099 | 14.8029 | -3.4791 | -0.1102 |
| CHS 123 Cancer    | -13.5790 | 3.8043 | 3.7630 | -5.6646 | 15.0568 | -4.3494 | -1.0221 |
| CHS 124 Control   | -13.2783 | 3.4763 | 4.0327 | -5.3643 | 15.2721 | -4.8479 | -0.8145 |
| CHS 125 Cancer    | -13.9234 | 2.6257 | 3.7239 | -4.8445 | 14.9356 | -4.4810 | -0.3325 |
| CHS 126 Control   | -13.0111 | 2.5698 | 3.9637 | -6.9247 | 15.2176 | -5.9420 | 0.1689  |
| CHS 127 Cancer    | -10.6267 | 3.9551 | 7.1806 | -4.0406 | 14.7686 | -5.7000 | 3.5884  |
| CHS 128 Control   | -14.9619 | 0.7146 | 2.7525 | -6.3065 | 14.4146 | -5.4784 | -2.8706 |
| CHS 129 Control   | -14.4579 | 1.7888 | 3.2704 | -6.3658 | 14.7387 | -4.0479 | -2.3865 |
| CHS 130 Cancer    | -14.0482 | 2.6236 | 3.2670 | -6.1740 | 13.8309 | -4.9050 | -1.3949 |
| CHS 131 Cancer    | -13.1110 | 3.0168 | 4.4029 | -5.7594 | 15.3676 | -3.7832 | -0.9793 |
| CHS 132 Control   | -12.8702 | 4.0437 | 4.0007 | -6.0400 | 16.0973 | -4.2088 | -0.9717 |
| CHS 133 Cancer    | -15.1244 | 1.8782 | 1.9631 | -5.0368 | 13.7567 | -3.8852 | -1.5721 |
| CHS 134 Control   | -13.3287 | 2.9854 | 3.4501 | -5.7895 | 14.6117 | -4.1844 | -1.1106 |
| CHS 135 Cancer    | -13.2014 | 3.5912 | 3.4465 | -4.9036 | 15.2558 | -4.4475 | -0.1919 |
| CHS 136 Control   | -12.2568 | 3.9154 | 4.1868 | -4.2301 | 15.1188 | -4.1539 | 1.8141  |
| CHS 137 Cancer    | -12.9297 | 2.9380 | 3.6312 | -5.0675 | 15.0955 | -4.9599 | -0.0388 |

| Sample ID Status  | BRCA1    | BRCA2   | BTG1    | CC2D1A  | CCNB2   | CCND3   | CD4     |
|-------------------|----------|---------|---------|---------|---------|---------|---------|
| Confirmed in EDRN | v        |         | v       | v       |         |         | v       |
| CHS 138 Control   | -13.2887 | 3.7304  | 3.4646  | -5.4618 | 14.8974 | -5.5047 | 0.1820  |
| CHS 139 Cancer    | -12.9390 | 3.8849  | 4.7557  | -4.9458 | 14.6182 | -4.5499 | 0.8749  |
| CHS 140 Control   | -13.2351 | 3.6207  | 4.8265  | -4.7138 | 15.5182 | -5.6377 | 0.2747  |
| CHS 141 Cancer    | -12.7410 | 2.5367  | 4.5737  | -4.1808 | 15.1908 | -6.2840 | 0.1714  |
| CHS 142 Control   | -13.3867 | 3.4178  | 3.4522  | -5.0065 | 15.0505 | -5.8047 | -0.3607 |
| CHS 143 Cancer    | -13.2297 | 3.9427  | 3.9649  | -5.4623 | 14.6062 | -5.0383 | 1.0960  |
| CHS 144 Control   | -14.1567 | 4.3626  | 3.9015  | -5.4362 | 15.0554 | -4.7349 | 0.6572  |
| CHS 145 Cancer    | -13.7431 | 2.8852  | 3.0304  | -5.6613 | 15.3938 | -4.8176 | 1.0811  |
| CHS 146 Control   | -13.5969 | 3.3426  | 2.8968  | -6.3157 | 15.7904 | -5.2481 | 0.4953  |
| CHS 147 Cancer    | -13.6105 | 3.6940  | 3.9115  | -5.7731 | 15.0298 | -4.0330 | -0.0301 |
| CHS 148 Control   | -12.4297 | 4.0710  | 4.6167  | -5.9061 | 14.8745 | -5.1528 | 0.7405  |
| CHS 149 Control   | -13.3715 | 3.2938  | 3.3598  | -5.7653 | 14.8377 | -3.9139 | -0.8425 |
| CHS 150 Cancer    | -13.2257 | 3.2110  | 3.8996  | -5.7529 | 14.8126 | -5.3172 | -0.5900 |
| CHS 151 Control   | -14.3196 | 2.6975  | 3.7079  | -3.8301 | 14.7771 | -4.5559 | -0.8439 |
| CHS 152 Cancer    | -14.2144 | 3.0932  | 3.3281  | -4.1381 | 14.8684 | -4.2245 | -0.3541 |
| CHS 153 Control   | -13.8940 | 2.5430  | 3.9934  | -5.9162 | 13.6312 | -6.0070 | -1.6927 |
| CHS 154 Cancer    | -13.2007 | 3.1541  | 4.0934  | -5.9649 | 15.2293 | -4.2274 | -0.1577 |
| CHS 155 Cancer    | -12.5276 | 4.1985  | 4.8337  | -4.2471 | 15.8071 | -4.2897 | 0.5419  |
| CHS 156 Control   | -13.7344 | 3.4622  | 4.0433  | -4.6717 | 14.9352 | -5.5436 | -1.1605 |
| CHS 157 Cancer    | -13.8324 | 2.0638  | 3.7639  | -5.3736 | 14.1700 | -4.6746 | -0.1558 |
| CHS 158 Control   | -12.8418 | 3.3026  | 4.3568  | -4.9389 | 14.6908 | -5.5143 | -0.2526 |
| CHS 159 Cancer    | -11.9086 | 3.1063  | 3.7258  | -5.6652 | 14.6376 | -5.3819 | 0.8903  |
| CHS 160 Control   | -13.3254 | 2.7565  | 3.4196  | -6.2403 | 14.8937 | -4.9228 | -1.0215 |
| EDRN 1 Early CRC  | 0.3681   | 0.1226  |         | 1.1734  |         |         | 0.1405  |
| EDRN 2 Early CRC  | -0.5648  | -2.5512 | -0.5181 | -1.0133 |         | 0.8000  | -1.9340 |
| EDRN 3 Early CRC  | 2.5373   | 0.1358  | 2.1415  | 3.3525  | -0.1260 | 2.5509  | -0.0527 |
| EDRN 4 Early CRC  | 1.4708   | 0.4269  | 1.1824  | 1.0730  | -0.4376 | 2.7264  | 0.3423  |
| EDRN 5 Late CRC   | 1.0643   | 0.4063  | 0.9376  | 0.9020  | -0.2075 | 3.1782  | 0.2885  |
| EDRN 6 Late CRC   | 1.0963   | 0.5687  | 1.0213  | 1.4323  | 0.4298  | -0.2545 | 0.6724  |
| EDRN 7 Late CRC   | 0.9925   | 1.1729  | 1.1829  | 1.5117  | 1.3955  | 1.8048  | 0.2847  |
| EDRN 8 Late CRC   | 1.1562   | 0.4672  | 0.7369  | 0.8367  | 0.8931  | 2.7469  | 0.3596  |
| EDRN 9 A-Adenoma  | 1.3286   | 0.2613  | 0.4447  | 0.5798  | -0.0354 | 1.5307  | -0.0985 |
| EDRN 10 A-Adenoma | 0.7621   | 0.2419  | 1.4390  | 1.2865  |         | 2.4093  | 0.9326  |
| EDRN 11 A-Adenoma |          | 0.0928  | -0.2357 | -0.0680 | 0.8771  | 0.8338  | 0.3186  |
| EDRN 12 A-Adenoma | 1.3512   | 0.8663  | 1.3573  | 1.9984  | 1.8005  | 3.7205  | -0.4459 |
| EDRN 13 Adenomas  | -0.0036  | -0.4582 | 1.4874  | 0.3220  | 0.1996  | 1.0263  | -0.0778 |
| EDRN 14 Adenomas  | 1.9175   | 2.6099  | 0.0695  | 2.4835  | -1.1616 | 1.6348  | 2.4183  |
| EDRN 15 Adenomas  | 0.7519   | 0.7541  | -0.4353 | 1.4987  | 0.6630  | 1.5528  | -0.0442 |
| EDRN 16 Adenomas  | 0.7254   | 2.5725  | -0.0859 | 0.6314  | 0.7231  | 1.3742  | 0.9812  |
| EDRN 17 Sv normal | 1.2847   | -0.1682 | -0.0077 | 1.1034  | 1.5258  | 2.1416  | 2.2462  |
| EDRN 18 Sv normal | 0.0823   | 1.8900  | 0.0466  | 1.8135  | 2.1160  | 2.0070  | 1.2426  |
| EDRN 19 Sv normal | 0.1870   | 0.3113  | 1.2581  | 1.0840  | 0.2865  | 1.0350  | 0.9531  |
| EDRN 20 Sv normal | 0.0465   | 1.8719  | 0.4032  | 0.5427  | 1.4242  | 1.5345  | 0.3205  |
| EDRN 21 Sc normal | 0.4719   | 0.4919  | 0.9634  | -0.4891 | 0.1106  | 0.9646  | 0.0274  |
| EDRN 22 Sc normal | 0.2437   | 0.5914  | 1.4829  | 0.0037  | 2.1397  | 2.0842  |         |

| Sample ID         | Status    | BRCA1   | BRCA2   | BTG1    | CC2D1A  | CCNB2   | CCND3   | CD4     |
|-------------------|-----------|---------|---------|---------|---------|---------|---------|---------|
| Confirmed in EDRN |           | v       |         | v       | v       |         |         | v       |
| EDRN 23           | Sc normal | 1.1734  | 0.7391  | -0.7888 | -0.0509 | -0.0268 | 1.9797  | -0.6695 |
| EDRN 24           | Sc normal | 0.1717  | 0.4883  | -0.1660 | 0.5220  | 0.1704  | 2.4043  | -0.0012 |
| EDRN 25           | Early CRC | 1.4770  | 1.1196  | 2.1038  | 1.6198  | -0.4995 | 0.9724  | 0.4663  |
| EDRN 26           | Early CRC | 2.2343  | 0.4219  | 1.4157  | 1.2000  | -2.3108 | 1.7496  | 0.6659  |
| EDRN 27           | Early CRC | -2.4517 | -0.6595 | 1.1726  | -0.2781 | -0.0802 | 0.9961  | 0.0322  |
| EDRN 28           | Early CRC | 1.5900  | 1.7119  | 1.6140  | 2.2008  | 0.4263  | 2.4435  | 2.7924  |
| EDRN 29           | Late CRC  | -0.1565 | -0.4371 | 1.0619  | 0.1707  | 0.8226  | 2.1420  | 0.4628  |
| EDRN 30           | Late CRC  |         | 0.3602  | 0.3158  | 1.1609  | 0.7779  | 2.1468  | 0.4139  |
| EDRN 31           | Late CRC  |         | -0.0153 | -0.5509 | 0.2642  | 0.2293  | 2.5532  | -0.1578 |
| EDRN 32           | Late CRC  | 0.7348  | 0.7904  |         | 0.7831  | 1.0124  | 2.7814  | 2.0044  |
| EDRN 33           | A-Adenoma | 1.7691  | 0.3584  | 1.6952  | 1.2668  |         | 0.8389  | 0.5879  |
| EDRN 34           | A-Adenoma | 0.3108  | 0.8413  | 0.5034  | 0.3800  | 1.2483  | 3.0810  | -0.8260 |
| EDRN 35           | A-Adenoma | 1.0208  | 0.6431  | 0.0807  | 0.8796  | 1.3516  | 1.9522  | 0.1128  |
| EDRN 36           | A-Adenoma | 2.7396  | 1.7296  | 0.9065  | 1.7575  | 0.8344  | 3.8524  | 0.4258  |
| EDRN 37           | Adenomas  | 2.4173  | 1.9053  | 0.0841  | 1.1103  | 0.2105  | 1.0570  | -0.2717 |
| EDRN 38           | Adenomas  | 1.7127  |         | -2.1112 | 1.4657  |         | 3.1009  | -0.2439 |
| EDRN 39           | Adenomas  | 1.8888  | 0.5199  |         | 2.3607  | 1.2974  | 1.2942  | 0.3788  |
| EDRN 40           | Adenomas  | -0.6655 | -3.8167 | -1.5263 | 2.1203  | 2.2153  | -1.0891 | -1.6314 |
| EDRN 41           | Sv normal | 0.2757  | 1.3121  | 1.4830  | 1.2653  | 3.9247  | 1.9455  | -0.4757 |
| EDRN 42           | Sv normal | 1.2417  | 0.5285  | 1.6895  | 2.3118  |         | 1.5161  | 1.5038  |
| EDRN 43           | Sv normal | -0.1286 | 2.7379  | 0.5850  | 0.0732  | -0.7891 | 2.6287  | 0.5653  |
| EDRN 44           | Sv normal | 0.1281  | 1.3150  | 0.0213  | -0.3712 |         | 2.7715  | 0.3768  |
| EDRN 45           | Sc normal | 1.4932  | 0.5242  | 1.8447  | 0.6196  |         | 0.3311  | 1.7504  |
| EDRN 46           | Sc normal | -0.4072 | -0.4057 | 0.0416  | -1.3330 |         |         | -0.8189 |
| EDRN 47           | Sc normal | -0.0457 | 0.8849  | 0.8210  | 0.8472  | -0.2586 | 0.8387  | -0.2425 |
| EDRN 48           | Sc normal |         | 0.9059  | -0.1543 | 0.6548  | 0.8221  | 2.2255  | 0.4015  |
| EDRN 49           | Early CRC | 0.5325  | 0.7812  | 1.2419  | 1.3162  | 1.5329  | 2.8294  | 0.2420  |
| EDRN 50           | Early CRC | -1.4584 | -0.7699 | 0.0373  | 0.8526  | 1.0715  | 0.8906  | -0.2680 |
| EDRN 51           | Early CRC | 0.8384  | 1.1230  | 1.3665  | 3.3439  |         | 2.3241  | 0.4118  |
| EDRN 52           | Early CRC | 0.4660  | 0.9193  | -0.1570 | 0.5315  |         | 2.0984  | -0.2308 |
| EDRN 53           | Late CRC  | 1.5785  | 1.1224  | 0.9699  | 0.7746  | 0.4612  | 1.9648  | 0.4233  |
| EDRN 54           | Late CRC  | 0.6188  | 0.6120  | 1.3830  | 0.9191  |         | 2.6565  | -0.1684 |
| EDRN 55           | Late CRC  | 0.2106  | 0.8852  | 0.6096  | 0.5312  | 0.4549  | 1.6478  | 0.2678  |
| EDRN 56           | Late CRC  | 1.4800  | 0.6259  | 0.0548  | 0.5848  |         | 3.3780  | 0.0565  |
| EDRN 57           | A-Adenoma | 0.8147  | 0.9388  | 0.2365  | 1.8047  |         | 1.4537  | 0.7383  |
| EDRN 58           | A-Adenoma |         | 0.7812  | 0.2405  | 1.1170  |         | 1.4266  | 0.5960  |
| EDRN 59           | A-Adenoma | 1.5601  | 0.6811  | 2.0512  | 2.8731  |         | 2.3423  | 0.9370  |
| EDRN 60           | A-Adenoma | 0.8522  | 0.6297  | 0.3822  | 0.8126  |         | 1.9573  | 0.4661  |
| EDRN 61           | Adenomas  | 0.7062  | -0.2105 | 0.1190  | 1.2329  | 0.7003  | 1.5815  | -0.0595 |
| EDRN 62           | Adenomas  | 1.1688  | 0.2670  | -0.6249 | 0.5408  | -0.1815 | 2.1523  | 1.0715  |
| EDRN 63           | Adenomas  | 0.4017  | 0.4997  | -0.2820 | 0.7065  |         | 0.3952  | 0.2081  |
| EDRN 64           | Adenomas  | 1.5178  | 0.1890  | 0.9141  | 0.8970  | 0.3218  | 1.8487  | 1.0342  |
| EDRN 65           | Sv normal | -0.0422 | 0.7752  | 0.6168  | 0.5088  | 0.5081  | -0.1976 | 0.2196  |
| EDRN 66           | Sv normal | 0.8144  | 0.2685  | 0.9010  | 0.5931  | 0.2659  | 2.1524  |         |
| EDRN 67           | Sv normal | 0.7651  | 0.0883  | 0.8666  | -0.6461 | 0.9934  | 2.3762  | 0.1191  |

| Sample ID         | Status    | BRCA1   | BRCA2   | BTG1    | CC2D1A  | CCNB2   | CCND3  | CD4     |
|-------------------|-----------|---------|---------|---------|---------|---------|--------|---------|
| Confirmed in EDRN |           | v       |         | v       | v       |         |        | v       |
| EDRN 68           | Sv normal | 0.6350  | 0.4385  | 0.7741  | 0.4521  | 0.3174  | 1.8126 | 0.2630  |
| EDRN 69           | Sc normal | 0.8515  | 0.6179  | 0.2691  | -0.1372 | 0.6421  | 1.4448 | 0.3501  |
| EDRN 70           | Sc normal | 1.5438  | 1.1196  | 0.5375  | 1.6653  |         | 1.9128 | 1.1803  |
| EDRN 71           | Sc normal | 1.2060  | 1.1527  | 1.7485  | 0.7525  | 0.5956  | 1.3329 | 0.3006  |
| EDRN 72           | Sc normal | 1.5538  | 0.3697  | 0.4809  | 0.5030  | 0.6493  | 1.9411 | 0.0460  |
| EDRN 73           | Early CRC | 2.1889  | 1.5487  | 1.3269  | 2.4931  | 0.4285  | 2.5177 | 3.5287  |
| EDRN 74           | Early CRC | 1.9033  | 0.9819  | 1.5613  | 1.7138  | 0.7856  | 2.5966 | 1.5175  |
| EDRN 75           | Early CRC | 1.5393  | 0.9407  | 2.5380  | 1.8620  | -0.1105 | 1.5060 | 0.7055  |
| EDRN 76           | Early CRC | 1.7450  | 1.1976  | 1.8730  | 1.6639  | 1.3070  | 1.3559 | -0.0888 |
| EDRN 77           | Late CRC  | 2.8618  | 1.4696  | 1.3040  | 2.2641  | 1.1898  | 1.1730 | 0.9181  |
| EDRN 78           | Late CRC  | 2.7059  | 1.2090  | -0.5917 | 0.7428  | 1.1142  | 3.9297 | 0.5410  |
| EDRN 79           | Late CRC  | 1.0911  | 1.5773  | 1.2262  | 1.2695  | 1.0712  | 4.1659 | 0.4139  |
| EDRN 80           | Late CRC  | -1.8865 | 1.1206  |         | 0.3587  | -0.0350 | 3.8331 | 0.1376  |
| EDRN 81           | A-Adenoma | 1.4073  | 0.5735  | 1.4776  | 1.1611  | 1.9851  | 2.5712 | -0.4335 |
| EDRN 82           | A-Adenoma |         | 1.3584  | 1.3501  | 0.6258  |         | 0.7325 | -0.3905 |
| EDRN 83           | A-Adenoma |         | 1.0340  | 3.2987  | 1.7088  | 0.8216  | 2.3634 | -0.1661 |
| EDRN 84           | A-Adenoma | 0.0778  | 0.4280  | -0.2155 |         | 0.9271  | 1.0438 | -1.3132 |
| EDRN 85           | Adenomas  | 1.3501  | 0.8677  | 1.0595  | 0.7082  | 1.0251  | 1.2012 | 1.1279  |
| EDRN 86           | Adenomas  |         |         | 1.1723  | -0.0636 | 0.3645  | 2.0132 | -0.0527 |
| EDRN 87           | Adenomas  | 1.2434  | 0.5523  | 0.5241  | 0.8742  | -0.3864 | 2.1032 | 1.4204  |
| EDRN 88           | Adenomas  | 1.8020  | 1.4706  | 2.8631  | 1.9573  | 0.8259  | 2.2109 | 1.5999  |
| EDRN 89           | Sv normal | -2.2707 | 0.3095  | -1.9712 | 1.3623  | 0.0537  | 0.8063 | -0.8499 |
| EDRN 90           | Sv normal | 0.4762  | -0.0856 | 0.7558  | 0.6807  | -0.2863 | 0.9883 | -0.6624 |
| EDRN 91           | Sv normal | 1.1141  | 0.0142  | -0.5304 | 0.9812  | 0.9454  | 1.5141 | 0.9389  |
| EDRN 92           | Sv normal | 0.0545  | 0.9226  | 0.8335  | 0.8330  |         | 1.0060 | 0.2094  |
| EDRN 93           | Sc normal | 0.7210  | 0.3396  | 0.2977  | 1.9302  | 1.1465  | 1.0561 | 0.6129  |
| EDRN 94           | Sc normal | -2.6371 | -0.3997 | -1.7975 | -1.2113 | 0.2280  | 0.9326 | -0.4625 |
| EDRN 95           | Sc normal | 2.0997  | 0.1299  | -2.5320 | -0.1575 | 0.1722  | 1.3386 | -0.4350 |
| EDRN 96           | Sc normal | -1.0075 | -4.2847 | -1.9063 | -2.4196 | -0.0619 | 0.7633 | -0.5440 |
| EDRN 97           | Early CRC | 1.7561  | 0.7699  | 0.0732  | 1.7062  | 0.3167  | 2.1632 | 1.2443  |
| EDRN 98           | Early CRC | 1.4791  | 1.4109  | 1.3632  | 2.5033  |         | 2.2205 | 2.2941  |
| EDRN 99           | Early CRC | -0.4957 | -0.1488 |         | 0.2513  |         | 1.0347 | -0.2581 |
| EDRN 100          | Early CRC | 1.1611  | 0.7669  | 2.1047  | 1.6307  |         | 0.8729 | 0.5631  |
| EDRN 101          | Late CRC  |         | 0.4403  | 0.7383  | 1.6999  | 1.8250  | 2.4405 | 0.3541  |
| EDRN 102          | Late CRC  | 1.8912  |         | 1.2847  | 1.6499  | 0.0221  | 3.2541 | 0.7426  |
| EDRN 103          | Late CRC  |         | -0.1944 | 0.0914  | 0.9921  | 1.9467  | 1.1999 | -1.3750 |
| EDRN 104          | Late CRC  | 0.8453  | 0.3899  |         | 1.2265  | 1.9920  | 0.3144 | -0.2664 |
| EDRN 105          | A-Adenoma | 3.0410  | 1.2769  | 1.2866  | 1.0392  | 0.1713  | 2.4325 | 1.0521  |
| EDRN 106          | A-Adenoma |         | 0.5726  | 0.8344  | 2.0013  | 1.5547  | 1.4058 | 0.9110  |
| EDRN 107          | A-Adenoma |         | 0.6827  | 1.6659  | 1.3450  |         | 2.3279 | 0.3058  |
| EDRN 108          | A-Adenoma | 1.1022  | 1.0929  | 2.5639  | 1.2104  |         | 1.3835 | 0.1708  |
| EDRN 109          | Adenomas  |         | 1.0197  | 1.4401  | 0.8569  | -0.1170 | 1.4254 | 0.5833  |
| EDRN 110          | Adenomas  | -0.1881 | -0.0617 | 0.5614  | 0.6633  | -0.2785 | 1.5061 | 0.7869  |
| EDRN 111          | Adenomas  | 1.2306  | 1.1573  | 2.5464  | 2.6273  | 1.6559  | 2.8943 | 2.0553  |
| EDRN 112          | Adenomas  | -3.9655 |         | -4.2539 | -2.6787 | 0.3494  | 2.1578 | -0.8741 |

| Sample ID Status   | BRCA1   | BRCA2   | BTG1    | CC2D1A  | CCNB2   | CCND3   | CD4     |
|--------------------|---------|---------|---------|---------|---------|---------|---------|
| Confirmed in EDRN  | v       |         | v       | v       |         |         | v       |
| EDRN 113 Sv normal | 0.6290  | 0.3877  |         | 0.4212  | 1.5517  | 1.7500  | 0.4008  |
| EDRN 114 Sv normal | 0.4393  | 0.8676  | 0.2890  | 1.4962  |         | 1.9398  | 1.5976  |
| EDRN 115 Sv normal |         | 0.7238  | 0.6318  | 0.4554  | -0.1252 | 1.4531  | -0.0961 |
| EDRN 116 Sv normal | 0.7094  | 0.0612  | -2.1083 | -0.0941 | -0.2316 | 1.8268  | -0.5310 |
| EDRN 117 Sc normal | 1.0897  | 0.7016  | 0.5048  | 1.3047  | 0.0639  | 1.8294  | -0.1107 |
| EDRN 118 Sc normal | 1.4976  | 0.8832  | 1.4414  | 0.9131  | 0.2394  | 2.2031  | 0.1598  |
| EDRN 119 Sc normal | 0.5648  | 0.5735  | 0.0431  | -0.5179 | -0.2481 | 1.8844  | -0.7609 |
| EDRN 120 Sc normal | 1.3383  | -0.7279 | -0.2071 | -0.1733 | 0.2338  | 1.8021  | -0.6760 |
| EDRN 121 Early CRC | 1.5883  | 1.1310  | 0.9441  | 0.2787  | 0.5111  | 2.3733  | 1.7675  |
| EDRN 122 Early CRC |         | 0.6998  | 0.4428  | 0.1824  | -0.1897 | 2.5536  | -0.6372 |
| EDRN 123 Early CRC | 0.9583  | 0.6946  | 1.3357  | 0.5528  | -0.0863 | 2.0868  | 0.7379  |
| EDRN 124 Early CRC | 0.7164  | 0.9808  | -0.2611 | 0.7930  | 0.8733  | 1.1300  | 0.8993  |
| EDRN 125 Late CRC  | 1.4812  | 0.9330  | 0.7820  | 1.2562  | 0.5868  | 1.5983  | 1.1306  |
| EDRN 126 Late CRC  | 1.3292  | -0.0925 | 1.7864  | 0.5159  | 1.3745  | 3.1074  | -0.2862 |
| EDRN 127 Late CRC  | 1.0441  | 0.9325  | 1.3086  | 0.9876  | 0.7781  | 1.4489  | 1.2391  |
| EDRN 128 Late CRC  | 2.2411  | 0.5044  | 1.1883  | 1.3728  | 0.4942  | 2.8061  | 0.6795  |
| EDRN 129 A-Adenoma | 2.0396  | 0.9618  | 1.5778  | 1.3730  | 1.4672  | 3.2354  | 2.1413  |
| EDRN 130 A-Adenoma | 1.0467  | 0.5368  | 0.4587  | 0.8553  | 0.1673  | 1.1974  | 0.4624  |
| EDRN 131 A-Adenoma | 1.3114  | 0.7151  | 1.4006  | 1.8371  | 0.5367  | 2.7096  | 1.4967  |
| EDRN 132 A-Adenoma | 1.4534  | 0.3157  | 0.4891  | 1.7181  | 0.8539  | 1.8983  | 1.4571  |
| EDRN 133 Adenomas  | 1.3712  | 0.3292  | -0.3916 | 1.1853  |         | 1.9855  | -0.0939 |
| EDRN 134 Adenomas  | 0.5219  | 0.8288  | -1.3291 | 1.5557  |         | 1.8681  | -0.3354 |
| EDRN 135 Adenomas  | 2.2088  | 0.5969  | 0.7905  | 1.9758  | 2.1080  | 1.9987  | 1.0043  |
| EDRN 136 Adenomas  | -0.6778 | -0.2625 | 0.8086  | 2.7766  | -0.2465 | 0.6767  | 0.5221  |
| EDRN 137 Sv normal | 0.4099  | 0.6310  | -0.2937 | 0.4512  | -0.7509 | 1.4998  | -0.1814 |
| EDRN 138 Sv normal | 0.1063  | 0.8440  | -0.0042 | 0.6805  | 0.5991  | 1.5450  | -0.3438 |
| EDRN 139 Sv normal | -0.3148 |         | 0.4522  | 1.1397  | 1.2128  | 0.6188  | -0.1140 |
| EDRN 140 Sv normal | 0.7915  | 0.6342  | 1.1239  | 0.5368  | 1.2235  | 1.4695  | -0.4946 |
| EDRN 141 Sc normal | 0.0503  | 0.3292  | 1.0699  | 0.1597  | 0.4104  | 0.7784  | -0.5853 |
| EDRN 142 Sc normal | -2.0014 |         | -0.1046 | -0.4491 | 0.3164  | 4.0405  | -2.3247 |
| EDRN 143 Sc normal | 0.6787  | 0.3088  | 1.1585  | 0.4704  | 0.6847  | 1.4844  | 0.0411  |
| EDRN 144 Sc normal | 0.2607  | 0.3963  | 0.0038  | 0.3247  | 0.4825  | -0.3879 | 0.0905  |
| EDRN 145 Early CRC | 1.0453  | 0.5946  | 1.3882  | 1.3629  |         | 3.8343  | 1.4470  |
| EDRN 146 Early CRC |         | 1.1234  | 0.6194  | -0.4134 |         | 3.1499  | 0.1265  |
| EDRN 147 Early CRC | 1.6119  | 0.6930  | 1.6249  | 3.2874  |         | 0.8965  | 1.2880  |
| EDRN 148 Early CRC | 1.7893  | 0.7716  | 1.0842  | 1.6177  |         | 1.1652  | 0.9652  |
| EDRN 149 Late CRC  | 0.9333  | 0.7601  | 0.2601  | 0.9972  |         | 0.2822  | 0.2139  |
| EDRN 150 Late CRC  | 1.9345  | 0.6952  | 1.5403  | 1.8984  | 0.8525  | 2.0780  | 0.6095  |
| EDRN 151 Late CRC  | 1.0743  | 0.9289  | 2.2262  | 2.3816  |         | 1.7114  | 1.2442  |
| EDRN 152 Late CRC  | 0.6845  | 0.6814  | 1.0741  | 1.0016  |         | 1.7755  | 0.5338  |
| EDRN 153 A-Adenoma | -0.9115 | -0.0814 | 0.7827  | -0.8857 |         | 1.8988  | -0.7023 |
| EDRN 154 A-Adenoma |         | 0.8386  | 1.1305  | 0.7549  |         | 1.6346  |         |
| EDRN 155 A-Adenoma | 2.0765  | 0.0006  | 1.1238  | 1.9859  |         | 1.0005  | 1.7578  |
| EDRN 156 A-Adenoma | 1.0985  | 0.6842  | 0.8609  | 1.2267  |         | 1.9376  | 0.7388  |
| EDRN 157 Adenomas  | 0.9482  | 1.2150  | 0.5757  | 1.5654  |         | 2.2632  | 0.3063  |

| Sample            | ID  | Status    | BRCA1   | BRCA2   | BTG1    | CC2D1A  | CCNB2   | CCND3   | CD4     |
|-------------------|-----|-----------|---------|---------|---------|---------|---------|---------|---------|
| Confirmed in EDRN |     |           | v       |         | v       | v       |         |         | v       |
| EDRN              | 158 | Adenomas  | 2.2814  | 1.0431  | -0.0685 | 2.5652  | 1.6197  | 1.6403  | -0.1247 |
| EDRN              | 159 | Adenomas  | 0.1066  | 0.0978  | 0.9012  | 0.5507  |         | 2.0264  | 0.3822  |
| EDRN              | 160 | Adenomas  | 0.2423  | 0.2599  | -0.9986 | 0.5061  |         | 1.1949  | -0.9546 |
| EDRN              | 161 | Sv normal | -0.7726 | -0.3826 | 0.3293  | 1.2164  |         | 0.5274  | 0.3817  |
| EDRN              | 162 | Sv normal | -0.6257 | 1.0902  | 0.8355  | -1.1617 | -0.8130 | 1.8475  | -1.5596 |
| EDRN              | 163 | Sv normal | -0.8251 | -0.4693 | 0.4678  | 0.2200  | 0.0123  | 1.1986  | -0.2735 |
| EDRN              | 164 | Sv normal | 0.6445  | 0.9074  | -0.0424 | 1.1433  | -0.1269 | 1.9332  | 0.1619  |
| EDRN              | 165 | Sc normal | 0.9225  | 0.6115  | -1.1631 | 0.0157  | 0.2156  | 1.7989  | -1.1560 |
| EDRN              | 166 | Sc normal | -0.3839 |         | -0.1138 | -1.1271 | -0.5169 | 3.2190  | -0.2800 |
| EDRN              | 167 | Sc normal | 1.5285  | 1.0841  | 0.2952  | 1.1983  | 1.9405  | 3.7286  | 1.5194  |
| EDRN              | 168 | Sc normal | 2.1940  | 0.2798  | 0.0034  | 0.6223  | 1.9124  | 0.9800  | 1.1650  |
| EDRN              | 169 | Early CRC | 0.6530  | 0.9472  | 1.3891  | 1.6339  | 0.6274  | 2.8884  | 1.1940  |
| EDRN              | 170 | Early CRC | -0.2943 | 0.9167  | 1.5022  | 0.7205  | 0.0936  | 2.6346  | -0.4096 |
| EDRN              | 171 | Late CRC  | 1.2836  | -0.0065 | 0.1050  | 2.0225  | 0.1789  | 0.3489  | 0.7592  |
| EDRN              | 172 | Late CRC  | 1.3792  | 0.8274  | 1.8590  | 1.8782  | 1.5561  | 2.3023  | 1.0789  |
| EDRN              | 173 | A-Adenoma | 1.0601  | 0.6208  | 0.2461  | 0.8370  | 1.3950  | 3.3044  | 0.6898  |
| EDRN              | 174 | A-Adenoma | 0.8940  | 0.5110  | 2.1291  | -0.5732 | 0.3482  | 2.3055  |         |
| EDRN              | 175 | Adenomas  | 1.8030  | 0.8060  | 0.2849  | 1.1163  |         | 1.9253  | 0.0446  |
| EDRN              | 176 | Adenomas  | -0.2140 | 0.5922  | 1.4216  | 1.1378  | 0.1651  | 0.7466  | 0.8275  |
| EDRN              | 177 | Sv normal | 2.6101  | 0.8894  | 0.3302  | 1.5586  | 2.0667  | 3.3120  | 0.7937  |
| EDRN              | 178 | Sv normal | 1.1689  | 0.6486  | -0.4010 | 0.6667  | 0.3349  | 1.4751  | 0.6268  |
| EDRN              | 179 | Sc normal | -0.9792 | -0.1740 | -2.4954 | 0.1064  | -0.6054 | -0.9386 | -2.9534 |
| EDRN              | 180 | Sc normal | 0.4521  | 0.3738  | 0.9979  | 0.1602  |         | 1.5566  | 1.0021  |



| Sample ID         | Status  | CD44     | CD8a    | CDC25C   | CDK4    | CHEK1   | CSMD3   | EDNRA   |
|-------------------|---------|----------|---------|----------|---------|---------|---------|---------|
| Confirmed in EDRN |         | v        |         |          |         | v       |         |         |
| CHS 1             | Control | -8.0396  | 2.9732  | -11.2684 | -1.1618 | 2.3702  | 21.3020 | 15.7832 |
| CHS 2             | Cancer  | -9.7137  | 0.9811  | -11.3939 | -3.4492 | 1.2650  | 18.5086 | 16.4371 |
| CHS 3             | Cancer  | -8.3718  | 1.7723  | -9.2308  | -0.6030 | 2.2058  | 18.6814 | 14.1550 |
| CHS 4             | Control | -10.1005 | -0.4299 | -11.1449 | -3.0263 | 0.7577  | 17.0551 | 16.1476 |
| CHS 5             | Control | -7.3917  | 1.7895  | -11.8515 | -1.4802 | 3.1821  | 19.4970 | 15.4949 |
| CHS 6             | Cancer  | -8.7046  | 0.1721  | -11.8206 | -2.4731 | 2.1937  | 18.8686 | 15.2279 |
| CHS 7             | Control | -9.1897  | 0.0421  | -12.6281 | -2.4897 | 1.0397  | 16.8453 | 16.1616 |
| CHS 8             | Cancer  | -9.6806  | 0.7148  | -11.5762 | -2.3926 | 2.5572  | 17.2064 | 16.3356 |
| CHS 9             | Cancer  | -8.4033  | 1.1410  | -11.6150 | -2.1239 | 2.9370  | 19.8026 | 15.8391 |
| CHS 10            | Control | -8.4779  | 0.7887  | -12.1329 | -2.3795 | 2.6179  | 18.1334 | 14.8758 |
| CHS 11            | Control | -10.9849 | -2.5580 | -13.5525 | -5.2383 | 0.0676  | 14.5633 | 14.4401 |
| CHS 12            | Cancer  | -9.8814  | 0.0115  | -11.6621 | -3.2328 | 2.7474  | 18.4443 | 15.5649 |
| CHS 13            | Cancer  | -9.3150  | 1.6808  | -11.0314 | -2.3920 | 3.3423  | 18.4281 | 14.3129 |
| CHS 14            | Control | -8.9713  | 0.7806  | -10.7047 | -3.0048 | 2.5520  | 18.1990 | 16.0246 |
| CHS 15            | Control | -8.6768  | 0.7725  | -11.7069 | -3.8965 | 1.8128  | 17.4968 | 15.3711 |
| CHS 16            | Cancer  | -7.8944  | 0.8260  | -11.4809 | -4.1375 | 2.5307  | 18.2171 | 15.9203 |
| CHS 17            | Cancer  | -8.1863  | 2.0018  | -10.3234 | -1.0064 | 3.8214  | 18.4503 | 12.9272 |
| CHS 18            | Control | -8.5376  | 0.5234  | -11.4831 | -4.0189 | 3.0109  | 18.5685 | 15.1645 |
| CHS 19            | Cancer  | -8.6523  | 0.7400  | -11.6855 | -3.9614 | 1.8887  | 18.2945 | 16.7862 |
| CHS 20            | Control | -10.9640 | -1.3692 | -13.1988 | -4.5570 | 0.7212  | 16.3557 | 15.4467 |
| CHS 21            | Cancer  | -8.3380  | 1.8653  | -11.2501 | -1.5920 | 3.0282  | 17.6348 | 16.7217 |
| CHS 22            | Control | -9.3525  | -0.9328 | -12.8996 | -4.3972 | 1.8616  | 16.8370 | 16.1877 |
| CHS 23            | Cancer  | -8.3417  | 1.5318  | -11.0539 | -1.7604 | 3.2019  | 19.7696 | 16.1375 |
| CHS 24            | Control | -13.0802 | -3.3195 | -13.7615 | -5.5064 | -2.7985 | 13.7257 | 13.6353 |
| CHS 25            | Cancer  | -8.8482  | 0.6209  | -11.6974 | -3.2198 | 1.7880  | 18.6692 | 15.7490 |
| CHS 26            | Control | -8.8666  | -0.0567 | -11.8744 | -3.0174 | 2.3471  | 18.0651 | 15.0374 |
| CHS 27            | Cancer  | -8.7690  | 1.0493  | -11.8189 | -2.2411 | 1.9652  | 16.8081 | 16.7648 |
| CHS 28            | Control | -8.3864  | 0.7086  | -10.7704 | -1.9218 | 2.5033  | 19.0992 | 14.7242 |
| CHS 29            | Cancer  | -8.7080  | 1.0144  | -11.2831 | -2.4224 | 1.1453  | 18.3840 | 15.3955 |
| CHS 30            | Control | -9.0797  | -0.4107 | -11.5144 | -2.2824 | 2.0793  | 17.8468 | 16.3070 |
| CHS 31            | Control | -9.1343  | 0.4034  | -9.7865  | -2.9961 | 2.3043  | 18.8394 | 14.8925 |
| CHS 32            | Cancer  | -9.1775  | 0.3460  | -9.9915  | -3.4808 | 2.0840  | 18.6986 | 15.3602 |
| CHS 33            | Cancer  | -9.1138  | 0.7449  | -10.6685 | -2.6625 | 2.6106  | 17.9750 | 16.2592 |
| CHS 34            | Control | -9.7177  | 0.4180  | -11.7041 | -3.1732 | 2.0864  | 17.4306 | 15.4668 |
| CHS 35            | Control | -9.9065  | 0.0068  | -12.1020 | -3.2672 | 0.9292  | 17.6286 | 15.3658 |
| CHS 36            | Cancer  | -9.3683  | 0.5141  | -11.3108 | -2.9871 | 1.5342  | 17.7766 | 15.1968 |
| CHS 37            | Cancer  | -9.1083  | 0.3120  | -12.2582 | -3.1468 | 2.5201  | 17.9014 | 15.0313 |
| CHS 38            | Control | -9.7458  | -0.2747 | -13.3223 | -3.7235 | 1.9180  | 17.7335 | 15.5627 |
| CHS 39            | Control | -10.3175 | 0.8049  | -12.9286 | -3.7307 | 0.3868  | 17.5265 | 14.9897 |
| CHS 40            | Cancer  | -9.5159  | 0.7485  | -11.7676 | -2.8615 | 2.6456  | 17.6114 | 15.3630 |
| CHS 41            | Control | -9.6640  | 0.7673  | -12.1882 | -3.4086 | 1.6757  | 17.5951 | 14.8147 |
| CHS 42            | Cancer  | -8.9051  | 0.2343  | -12.7004 | -3.4658 | 2.2981  | 17.6535 | 15.4173 |
| CHS 43            | Control | -8.4471  | 0.2811  | -11.4774 | -2.9446 | 1.8570  | 18.1221 | 15.0628 |
| CHS 44            | Cancer  | -8.8610  | 0.8670  | -11.8277 | -2.5573 | 2.4712  | 17.6823 | 15.0144 |
| CHS 45            | Control | -10.0976 | 0.5483  | -12.1050 | -2.5943 | 2.0825  | 17.4957 | 15.8418 |

| Sample ID         | Status  | CD44     | CD8a    | CDC25C   | CDK4    | CHEK1  | CSMD3   | EDNRA   |
|-------------------|---------|----------|---------|----------|---------|--------|---------|---------|
| Confirmed in EDRN |         | v        |         |          |         | v      |         |         |
| CHS 46            | Cancer  | -7.6377  | 1.0925  | -10.4826 | -2.7369 | 3.0765 | 18.7134 | 15.7295 |
| CHS 47            | Cancer  | -8.5063  | 0.9749  | -12.3801 | -2.8350 | 2.6554 | 17.8884 | 15.9656 |
| CHS 48            | Control | -9.3673  | 0.7844  | -12.4962 | -2.6045 | 1.9507 | 17.7407 | 15.7866 |
| CHS 49            | Cancer  | -9.1128  | 0.1021  | -11.5321 | -3.1147 | 1.7667 | 17.4472 | 14.9328 |
| CHS 50            | Control | -9.7910  | 0.5635  | -12.7935 | -3.1329 | 2.0783 | 17.5111 | 15.0128 |
| CHS 51            | Cancer  | -8.7924  | 0.2225  | -11.8054 | -4.2457 | 1.6242 | 18.0924 | 16.2906 |
| CHS 52            | Control | -9.2227  | -0.4049 | -12.5790 | -3.9507 | 1.7430 | 17.5671 | 15.0396 |
| CHS 53            | Control | -8.9795  | 0.5813  | -12.1231 | -3.5102 | 2.9659 | 17.2372 | 15.4616 |
| CHS 54            | Cancer  | -8.7575  | 0.6213  | -12.0532 | -3.6428 | 2.1890 | 17.9669 | 15.8465 |
| CHS 55            | Cancer  | -9.9356  | -0.0371 | -11.1919 | -3.9364 | 1.7067 | 17.3347 | 15.6622 |
| CHS 56            | Control | -9.0640  | 1.2503  | -11.9209 | -3.2107 | 2.7618 | 17.3113 | 16.2689 |
| CHS 57            | Control | -8.3074  | 0.4507  | -11.7383 | -3.6101 | 2.5512 | 17.5452 | 15.0824 |
| CHS 58            | Cancer  | -8.6418  | 0.2403  | -11.0721 | -3.0065 | 2.4320 | 17.8401 | 15.1510 |
| CHS 59            | Cancer  | -9.8423  | 0.8766  | -12.4806 | -2.7019 | 2.8514 | 18.1731 | 14.9589 |
| CHS 60            | Control | -10.1382 | -0.1463 | -11.5713 | -2.7807 | 2.7283 | 17.2432 | 15.2360 |
| CHS 61            | Cancer  | -9.5729  | 0.2193  | -12.1668 | -2.8401 | 1.6345 | 18.8926 | 16.2782 |
| CHS 62            | Control | -10.8849 | -0.6989 | -12.1240 | -2.9205 | 1.0034 | 16.3175 | 13.8654 |
| CHS 63            | Cancer  | -7.3237  | 1.3531  | -10.5292 | -2.2063 | 2.7178 | 19.4070 | 15.3318 |
| CHS 64            | Control | -9.1934  | 0.3815  | -12.4226 | -3.2034 | 1.6670 | 17.6690 | 15.3618 |
| CHS 65            | Cancer  | -7.4920  | 1.9603  | -10.9448 | -1.9904 | 2.1481 | 19.6269 | 15.4199 |
| CHS 66            | Control | -8.3895  | 1.9164  | -10.8833 | -1.2929 | 2.8151 | 19.8692 | 14.6205 |
| CHS 67            | Control | -11.8295 | 0.6264  | -13.1568 | -2.2693 | 0.7272 | 16.8535 | 15.3144 |
| CHS 68            | Cancer  | -9.3445  | 0.2637  | -10.9955 | -2.5318 | 1.3607 | 18.5175 | 16.2152 |
| CHS 69            | Cancer  | -6.9339  | 1.0005  | -10.5956 | -2.2313 | 1.5127 | 18.8013 | 15.8940 |
| CHS 70            | Control | -9.3355  | 0.5029  | -10.9374 | -2.5222 | 1.6686 | 19.0384 | 15.9122 |
| CHS 71            | Cancer  | -8.7674  | 0.6749  | -11.0650 | -3.2796 | 1.7872 | 17.4305 | 16.1402 |
| CHS 72            | Control | -9.5973  | -0.0212 | -11.7739 | -2.1499 | 2.4738 | 17.1923 | 15.8016 |
| CHS 73            | Control | -9.9881  | -1.7756 | -12.3896 | -5.4413 | 0.5326 | 16.3419 | 17.4179 |
| CHS 74            | Cancer  | -8.9941  | 1.8460  | -10.9723 | -1.8973 | 2.6507 | 19.0554 | 16.0631 |
| CHS 75            | Cancer  | -9.0628  | 0.6867  | -11.5193 | -2.4216 | 1.7995 | 19.2213 | 14.8488 |
| CHS 76            | Control | -9.6405  | 0.5766  | -12.0087 | -3.4946 | 1.1849 | 17.8952 | 15.9945 |
| CHS 77            | Control | -10.2952 | 0.0511  | -12.7820 | -1.9588 | 1.3102 | 17.6751 | 15.1650 |
| CHS 78            | Cancer  | -8.9413  | 1.2608  | -12.0295 | -2.2358 | 2.4832 | 17.8034 | 15.2317 |
| CHS 79            | Cancer  | -7.7371  | 1.4894  | -10.3933 | -3.4972 | 2.3154 | 18.3954 | 16.3991 |
| CHS 80            | Control | -7.6986  | 0.5056  | -11.3433 | -1.8308 | 2.2496 | 18.8263 | 14.9957 |
| CHS 81            | Control | -9.6087  | 0.1760  | -10.9977 | -3.4779 | 1.5787 | 18.0880 | 15.6882 |
| CHS 82            | Cancer  | -8.6497  | 1.3397  | -11.1592 | -3.4829 | 2.5226 | 18.4277 | 17.2570 |
| CHS 83            | Cancer  | -8.2753  | 1.3602  | -9.9070  | -2.9048 | 2.8681 | 18.2132 | 15.9157 |
| CHS 84            | Control | -10.0715 | 0.8806  | -12.2975 | -3.2401 | 2.6119 | 17.8328 | 15.5080 |
| CHS 85            | Cancer  | -9.2527  | 0.9302  | -11.9930 | -2.5990 | 2.9431 | 17.3960 | 14.6559 |
| CHS 86            | Control | -10.1459 | 0.2644  | -12.6888 | -3.0085 | 2.2287 | 17.3932 | 14.5692 |
| CHS 87            | Control | -9.8619  | -0.6013 | -14.2154 | -3.5692 | 0.9631 | 17.7088 | 15.5545 |
| CHS 88            | Cancer  | -9.6233  | 0.1587  | -12.5512 | -2.8018 | 1.0624 | 17.7203 | 16.3776 |
| CHS 89            | Control | -9.8681  | 0.4556  | -11.8965 | -2.7658 | 2.5822 | 17.6870 | 14.4994 |
| CHS 90            | Cancer  | -8.2896  | 0.0841  | -11.8196 | -3.2801 | 2.5053 | 17.6944 | 14.5434 |

| Sample ID Status  | CD44     | CD8a    | CDC25C   | CDK4    | CHEK1   | CSMD3   | EDNRA   |
|-------------------|----------|---------|----------|---------|---------|---------|---------|
| Confirmed in EDRN | v        |         |          |         | v       |         |         |
| CHS 91 Cancer     | -9.3658  | -0.4263 | -12.1061 | -2.9811 | 2.5159  | 17.6935 | 15.1284 |
| CHS 92 Control    | -8.8583  | 0.4618  | -11.1395 | -2.4361 | 2.0306  | 17.6460 | 14.2742 |
| CHS 93 Control    | -8.9648  | 0.6763  | -10.6300 | -2.8851 | 1.9485  | 18.3820 | 15.9814 |
| CHS 94 Cancer     | -9.4245  | 0.8619  | -11.0606 | -2.7344 | 1.9932  | 18.1003 | 15.8789 |
| CHS 95 Control    | -8.6946  | 0.5739  | -11.2873 | -2.6417 | 2.1118  | 18.0178 | 14.4061 |
| CHS 96 Cancer     | -7.9371  | 0.6627  | -11.2689 | -2.6952 | 1.9223  | 17.6701 | 14.7447 |
| CHS 97 Cancer     | -9.1537  | 0.6329  | -12.5982 | -2.3563 | 2.1847  | 19.1156 | 16.2037 |
| CHS 98 Control    | -10.5897 | -2.0943 | -13.8713 | -3.9536 | -0.1229 | 17.1641 | 14.7306 |
| CHS 99 Cancer     | -8.1582  | 0.6656  | -10.6529 | -2.1777 | 1.6353  | 17.7249 | 15.3362 |
| CHS 100 Control   | -8.2530  | 0.9453  | -10.1522 | -3.2109 | 0.9798  | 18.4376 | 15.2816 |
| CHS 101 Cancer    | -9.7489  | 1.2932  | -12.0408 | -1.7425 | 2.9949  | 18.2343 | 15.9634 |
| CHS 102 Control   | -9.4081  | 2.1224  | -9.4258  | -1.3956 | 3.0530  | 17.9589 | 15.5123 |
| CHS 103 Cancer    | -9.3315  | 1.2632  | -11.8951 | -2.9217 | 2.3402  | 17.5983 | 14.8767 |
| CHS 104 Control   | -9.2623  | -0.0019 | -11.0048 | -5.5665 | 1.7664  | 19.0362 | 15.4942 |
| CHS 105 Cancer    | -9.4462  | 1.2474  | -10.9201 | -2.3556 | 2.1652  | 17.8311 | 15.8330 |
| CHS 106 Control   | -10.3009 | -0.4196 | -11.7940 | -4.6255 | 1.1746  | 17.3024 | 17.8212 |
| CHS 107 Cancer    | -9.9528  | 0.0241  | -12.1306 | -3.2284 | 2.6070  | 17.3248 | 16.1925 |
| CHS 108 Control   | -8.0226  | 1.3513  | -11.5220 | -2.9752 | 2.0293  | 18.5161 | 15.6653 |
| CHS 109 Control   | -9.6757  | -0.0266 | -11.6004 | -2.7471 | 1.2978  | 17.8547 | 14.4149 |
| CHS 110 Cancer    | -8.7870  | -0.1243 | -11.6000 | -3.0694 | 1.8501  | 18.1074 | 14.6374 |
| CHS 111 Control   | -9.2347  | 0.6250  | -11.9083 | -2.6850 | 1.4726  | 17.7171 | 14.2904 |
| CHS 112 Cancer    | -8.8640  | 0.2564  | -12.2595 | -2.7318 | 2.1105  | 17.6397 | 15.7237 |
| CHS 113 Control   | -8.7635  | 1.3532  | -11.7234 | -2.5166 | 3.7594  | 18.4110 | 14.8484 |
| CHS 114 Cancer    | -8.3316  | 0.5550  | -12.6514 | -3.2615 | 2.2160  | 17.6647 | 14.2487 |
| CHS 117 Control   | -9.6733  | 0.4058  | -13.2020 | -2.7564 | 2.1101  | 17.6587 | 15.3808 |
| CHS 118 Cancer    | -9.2673  | 0.2641  | -10.9911 | -3.1990 | 1.9083  | 18.0253 | 15.6813 |
| CHS 119 Cancer    | -7.3174  | 0.7951  | -10.9669 | -2.2742 | 2.9149  | 18.1271 | 16.3360 |
| CHS 120 Control   | -9.4364  | 0.3245  | -12.1743 | -2.6739 | 2.3912  | 17.5281 | 15.7014 |
| CHS 121 Control   | -9.9015  | -0.0988 | -11.2568 | -3.2592 | 1.8811  | 18.1569 | 16.4282 |
| CHS 122 Cancer    | -8.0079  | 0.6746  | -12.0946 | -2.5253 | 2.4968  | 17.9952 | 16.5131 |
| CHS 123 Cancer    | -8.3412  | 1.3982  | -11.7520 | -2.6560 | 2.1827  | 17.6309 | 15.6631 |
| CHS 124 Control   | -10.1427 | 1.3409  | -11.4263 | -2.4204 | 2.2975  | 18.2689 | 15.4656 |
| CHS 125 Cancer    | -10.0408 | 0.6356  | -11.6581 | -2.7152 | 1.7516  | 18.4395 | 15.8276 |
| CHS 126 Control   | -8.0340  | -0.0389 | -11.9143 | -2.5017 | 1.7710  | 18.2865 | 15.1423 |
| CHS 127 Cancer    | -8.6172  | 0.8138  | -11.5589 | -2.1707 | 2.6962  | 16.9923 | 15.0405 |
| CHS 128 Control   | -11.3899 | -0.8280 | -12.4371 | -4.4774 | -0.1695 | 16.5070 | 15.3820 |
| CHS 129 Control   | -8.8708  | -0.6536 | -12.3308 | -3.4753 | 0.8671  | 17.6578 | 14.7803 |
| CHS 130 Cancer    | -10.2024 | -0.6932 | -12.8604 | -2.9410 | 1.5246  | 16.9608 | 15.3511 |
| CHS 131 Cancer    | -9.8788  | 0.8830  | -11.4027 | -3.0975 | 2.3453  | 18.0715 | 14.9541 |
| CHS 132 Control   | -10.4904 | 1.6076  | -10.6981 | -2.1943 | 2.3925  | 18.2017 | 15.5656 |
| CHS 133 Cancer    | -10.7482 | -1.0164 | -12.8933 | -4.3941 | 0.6677  | 18.0217 | 16.8396 |
| CHS 134 Control   | -9.5343  | -0.0937 | -11.7188 | -3.5570 | 1.5369  | 18.8132 | 15.6868 |
| CHS 135 Cancer    | -8.2978  | 1.0780  | -10.3374 | -2.4750 | 2.4876  | 17.4903 | 15.5835 |
| CHS 136 Control   | -7.0711  | 0.9204  | -10.6193 | -2.9823 | 2.7200  | 18.2190 | 15.2085 |
| CHS 137 Cancer    | -7.6755  | 0.0384  | -11.9032 | -2.7684 | 2.0592  | 19.0610 | 15.9997 |

| Sample ID Status  | CD44     | CD8a    | CDC25C   | CDK4    | CHEK1   | CSMD3   | EDNRA   |
|-------------------|----------|---------|----------|---------|---------|---------|---------|
| Confirmed in EDRN | v        |         |          |         | v       |         |         |
| CHS 138 Control   | -9.0490  | 0.4138  | -12.2912 | -3.3011 | 2.4684  | 18.3524 | 15.4341 |
| CHS 139 Cancer    | -7.8976  | 1.3687  | -11.1539 | -2.6510 | 2.4699  | 18.2116 | 15.0329 |
| CHS 140 Control   | -9.4829  | 1.7438  | -11.4782 | -2.6335 | 2.6024  | 17.4255 | 14.9989 |
| CHS 141 Cancer    | -9.9237  | 0.6211  | -11.3725 | -2.0048 | 1.5339  | 18.1147 | 14.9725 |
| CHS 142 Control   | -9.1415  | -0.2899 | -12.0671 | -3.1222 | 2.4918  | 18.0201 | 14.9094 |
| CHS 143 Cancer    | -9.2202  | 1.1858  | -11.2741 | -3.2717 | 2.3725  | 18.1592 | 14.9955 |
| CHS 144 Control   | -7.2903  | 1.4880  | -11.9574 | -2.6861 | 3.4673  | 17.8275 | 15.3237 |
| CHS 145 Cancer    | -8.0941  | 0.6096  | -12.1324 | -3.4330 | 1.8613  | 18.2503 | 15.9224 |
| CHS 146 Control   | -8.6499  | 0.8802  | -11.3677 | -3.4612 | 2.4890  | 17.5364 | 15.4390 |
| CHS 147 Cancer    | -8.6855  | 0.8122  | -11.6183 | -3.3118 | 2.5904  | 19.1120 | 14.7946 |
| CHS 148 Control   | -8.1725  | 1.0470  | -11.0964 | -3.1118 | 2.4351  | 17.7587 | 16.3629 |
| CHS 149 Control   | -9.0186  | 0.2796  | -11.6345 | -3.2764 | 2.0908  | 17.5858 | 15.9276 |
| CHS 150 Cancer    | -9.1058  | 1.2008  | -11.2458 | -2.3989 | 1.4294  | 17.3963 | 15.4109 |
| CHS 151 Control   | -9.4491  | -0.2331 | -12.0624 | -3.2694 | 1.4204  | 17.9728 | 14.8055 |
| CHS 152 Cancer    | -8.8755  | 0.5745  | -11.6549 | -2.9803 | 1.6567  | 17.3699 | 14.8476 |
| CHS 153 Control   | -9.7010  | -0.0527 | -11.8183 | -2.9072 | 1.5431  | 17.5131 | 14.9153 |
| CHS 154 Cancer    | -9.7567  | 0.4286  | -11.0635 | -1.7584 | 2.3493  | 18.0627 | 16.0517 |
| CHS 155 Cancer    | -8.5103  | 1.0411  | -10.2136 | -2.3631 | 2.6286  | 18.5238 | 16.1954 |
| CHS 156 Control   | -8.8290  | 0.9700  | -12.2730 | -3.6573 | 2.2402  | 18.7128 | 15.6979 |
| CHS 157 Cancer    | -10.8367 | -0.4197 | -13.1324 | -2.8315 | 1.2854  | 16.9688 | 15.4306 |
| CHS 158 Control   | -9.6202  | 0.7968  | -11.9005 | -2.4975 | 2.7379  | 18.4823 | 14.5445 |
| CHS 159 Cancer    | -9.2016  | 0.1968  | -12.1366 | -3.1965 | 2.1114  | 18.1520 | 15.3533 |
| CHS 160 Control   | -9.6600  | 0.2010  | -11.6209 | -2.3997 | 1.7406  | 17.8592 | 15.6996 |
| EDRN 1 Early CRC  | 0.1089   |         |          | 0.9725  | 1.1523  | 1.2552  | 0.2590  |
| EDRN 2 Early CRC  | -1.4650  |         | -4.9597  | -0.6413 | -1.2872 | -1.3248 | -2.5888 |
| EDRN 3 Early CRC  | 2.0855   | -1.5241 | 1.5586   | -0.5018 | 0.9720  | -0.2021 | -0.9562 |
| EDRN 4 Early CRC  | 0.0094   | -2.3013 | -1.4963  | -1.1345 | 2.4230  |         | -0.3056 |
| EDRN 5 Late CRC   | 0.4900   | -1.6022 | 0.6494   | 0.6226  | 1.0416  | -0.3390 | -0.9133 |
| EDRN 6 Late CRC   | 0.5410   | -0.3290 | 0.7837   | -0.4952 | 0.6873  | -0.1163 | -0.4242 |
| EDRN 7 Late CRC   | 0.9315   | 0.5310  | 0.0502   | 0.4024  | 1.6197  | 1.3148  | 0.5451  |
| EDRN 8 Late CRC   | 0.3702   | 1.5981  | 0.4383   | -1.1688 | 0.9946  | 1.4980  | 0.0203  |
| EDRN 9 A-Adenoma  | 0.3387   | -1.3039 | -0.2962  | -0.8409 | 0.4500  | -2.0609 | -1.3492 |
| EDRN 10 A-Adenoma | 0.8393   | -0.9912 | 1.9603   | 0.2398  | 0.6749  | 0.0165  | 0.1962  |
| EDRN 11 A-Adenoma | 0.4163   | 2.2560  | 1.1175   | -0.4944 | 0.9455  | 4.0415  | 0.6638  |
| EDRN 12 A-Adenoma | 1.3808   | 1.9929  | 0.5914   | 0.0341  | 0.9093  | -0.3314 | 0.3525  |
| EDRN 13 Adenomas  | 1.5551   | -2.8874 | 0.0289   | -1.5520 | 0.7148  | -0.2863 | -0.7308 |
| EDRN 14 Adenomas  | 1.1545   | 0.0381  | 0.2730   | 0.6481  | 2.7397  | -0.8254 | 0.9194  |
| EDRN 15 Adenomas  | 1.0050   | 0.2917  | 0.7990   | 0.1656  | 1.1790  | -0.6098 | -0.4582 |
| EDRN 16 Adenomas  | -0.0910  | -0.7862 | 0.5946   | -0.6168 | 1.9400  | -0.5901 | -0.5492 |
| EDRN 17 Sv normal | 0.8032   | 0.8773  | 0.5249   | -1.7841 | 0.3877  | -0.5720 | -0.1388 |
| EDRN 18 Sv normal | 0.6885   |         | 0.2731   | 0.5193  | 0.6872  | 1.6652  | -0.6355 |
| EDRN 19 Sv normal | 0.7734   | -0.0856 | 0.7617   | -0.6312 | 0.0936  | -0.9451 | -0.2476 |
| EDRN 20 Sv normal | 0.1221   | 0.8273  | 0.9771   | 0.5759  | 0.1269  | -0.9127 | -0.4892 |
| EDRN 21 Sc normal | -0.4002  | -0.0783 | 2.1317   |         | 0.0180  | -0.6752 | -0.9169 |
| EDRN 22 Sc normal | -0.5481  | -1.2314 | 1.4343   | -0.5617 | 0.5153  | 2.7491  | -0.3617 |

| Sample ID         | Status    | CD44    | CD8a    | CDC25C  | CDK4    | CHEK1   | CSMD3   | EDNRA   |
|-------------------|-----------|---------|---------|---------|---------|---------|---------|---------|
| Confirmed in EDRN |           | v       |         |         |         | v       |         |         |
| EDRN 23           | Sc normal |         | 1.6796  | 0.5144  | -1.1637 | 0.1200  | 0.5000  | 0.7304  |
| EDRN 24           | Sc normal | 0.2115  | -0.9562 | -0.7949 | -0.0362 | 0.9825  | -0.1053 | -0.7667 |
| EDRN 25           | Early CRC |         |         |         | -0.8311 | 0.3931  | 0.3070  | -0.7769 |
| EDRN 26           | Early CRC | 2.8221  | -0.6338 | -0.1979 | -0.7073 | 0.6459  | 0.1362  | -0.5591 |
| EDRN 27           | Early CRC | -1.9958 | -1.3031 | -0.0804 | -2.1665 | -0.3560 | 0.3013  | -2.3145 |
| EDRN 28           | Early CRC | 5.2555  | 0.7775  | 1.3916  | -0.1560 | 2.3091  | 0.6772  | -0.8256 |
| EDRN 29           | Late CRC  | -0.9208 | -0.2471 | -0.3865 |         | -0.1322 | 0.6413  | -0.5868 |
| EDRN 30           | Late CRC  | 1.1108  | -0.5482 | 0.1165  | 0.8079  | 0.6552  | 0.7846  | -0.3751 |
| EDRN 31           | Late CRC  | -0.2708 | -0.6459 | 0.8584  | -0.2424 | -0.5481 | -0.5217 | -0.8277 |
| EDRN 32           | Late CRC  | -0.3730 | -0.7280 | 0.8038  |         | 0.1276  | -0.2592 |         |
| EDRN 33           | A-Adenoma |         | -0.3282 | -1.2519 | 0.5800  | 2.0612  | -0.4294 | 0.0962  |
| EDRN 34           | A-Adenoma | -0.0198 | 1.8337  | 1.3752  |         | 2.3711  | -0.0753 | -0.4529 |
| EDRN 35           | A-Adenoma | -0.6932 | -0.6983 | -0.2403 | -0.4588 | 2.4033  | 0.2122  | -1.0132 |
| EDRN 36           | A-Adenoma |         | 0.1587  | 1.2627  | -1.0168 | 1.9244  | 0.4709  | 0.2982  |
| EDRN 37           | Adenomas  | -0.1892 | -0.2771 | 0.7175  |         | 1.5352  | 0.0417  | 0.6659  |
| EDRN 38           | Adenomas  | 1.1306  | 1.0623  |         | 1.0360  | 1.2570  |         | 0.6657  |
| EDRN 39           | Adenomas  | 0.4299  | 2.4131  | 1.7282  | -0.6891 | 0.9047  | 0.6104  | 0.2085  |
| EDRN 40           | Adenomas  | -2.0036 | -0.7833 | -0.4533 | -1.0749 | -4.1064 |         | 0.3639  |
| EDRN 41           | Sv normal | 0.0467  |         | 1.5120  | 0.0667  | 1.8717  |         | 0.2819  |
| EDRN 42           | Sv normal | 1.3813  | 0.0687  | -0.9233 | 0.3210  | 1.5404  | -0.4779 | 0.3396  |
| EDRN 43           | Sv normal | 1.4111  | -1.2575 | -0.1008 | -0.8131 | 2.8249  | 0.1931  | -0.4144 |
| EDRN 44           | Sv normal | 0.0804  | -0.4817 | 0.8755  |         | 1.1128  | 0.0537  | -0.0188 |
| EDRN 45           | Sc normal | 3.2278  |         | 0.9150  | 0.2211  | 0.6312  | 1.3918  | -0.1346 |
| EDRN 46           | Sc normal | -1.1718 | -2.1382 | -0.4849 |         | -0.7516 | -0.4172 | -1.1474 |
| EDRN 47           | Sc normal |         | -0.1026 | -0.1150 |         | 0.7882  | -1.2095 | -0.8642 |
| EDRN 48           | Sc normal | 0.2597  | 0.2472  | 0.2571  | -0.3314 | 0.6249  | 0.5075  | -0.5058 |
| EDRN 49           | Early CRC |         | -1.8934 | 0.8200  | -0.0331 | 0.7494  | 2.3493  | -1.4226 |
| EDRN 50           | Early CRC | -0.2973 | -0.9492 | 0.5337  | -2.0800 | -0.5311 | -0.3209 | -0.7467 |
| EDRN 51           | Early CRC | 2.0445  |         | 0.2090  | -0.3687 | 1.9327  | 3.4507  | -0.8349 |
| EDRN 52           | Early CRC | 0.4061  | -0.1006 | 0.7098  |         | 1.8066  | -0.2596 | -0.0791 |
| EDRN 53           | Late CRC  |         | -0.1657 | 0.9308  | -0.6956 | 1.1040  | 0.8456  | -0.2453 |
| EDRN 54           | Late CRC  | 0.8165  | 1.5286  | 0.7483  | -0.5800 | 1.2405  | 0.3514  | -0.1432 |
| EDRN 55           | Late CRC  | -0.2861 | -0.3736 | -0.1037 | -0.3669 | 1.9878  | -0.6063 | -0.8155 |
| EDRN 56           | Late CRC  | 0.5020  |         | 0.3003  | 0.0715  | 0.8986  | -0.6699 | -0.3580 |
| EDRN 57           | A-Adenoma |         |         | 2.0898  | 0.2717  | 1.8328  | -1.0514 | -0.0186 |
| EDRN 58           | A-Adenoma | 0.0909  | -0.0652 | 0.4184  | 0.1362  | 0.9695  | 0.9890  | 0.1181  |
| EDRN 59           | A-Adenoma | 2.3424  | 0.4479  | -0.0612 | 0.0781  | 1.6097  | -0.1806 | -0.9715 |
| EDRN 60           | A-Adenoma | 0.5611  | 0.9539  | -0.0820 | -0.1609 | 1.6034  | -0.4091 | -0.8243 |
| EDRN 61           | Adenomas  | 0.5794  | 1.0097  | 0.5709  | -0.2616 | 0.1713  | 0.3108  | 0.0429  |
| EDRN 62           | Adenomas  | 0.6387  | 0.7936  | 0.4622  | -0.7626 | 0.5258  | 0.3069  | -0.5175 |
| EDRN 63           | Adenomas  | 0.1746  | -0.6877 | 0.3295  | 0.0854  | 0.6758  | -0.1678 | -0.6091 |
| EDRN 64           | Adenomas  | 0.9110  | -0.9293 | 0.5697  | -0.2820 | 0.2611  | 0.4105  | -0.2800 |
| EDRN 65           | Sv normal | 0.1505  | -0.1222 | -0.3790 | -0.9340 | 1.1923  | -0.7756 | 0.3828  |
| EDRN 66           | Sv normal |         | -1.0058 | -0.2991 | -0.9360 | 0.4472  | -0.1695 | 0.1127  |
| EDRN 67           | Sv normal | -0.5007 | -0.3341 | -0.4469 |         | 0.3166  | -0.6125 | -0.0643 |

| Sample ID         | Status    | CD44    | CD8a    | CDC25C  | CDK4    | CHEK1   | CSMD3   | EDNRA   |
|-------------------|-----------|---------|---------|---------|---------|---------|---------|---------|
| Confirmed in EDRN |           | v       |         |         |         | v       |         |         |
| EDRN 68           | Sv normal | -0.2686 | -0.7068 | -0.5613 |         | 0.4585  | -0.4870 | 0.0141  |
| EDRN 69           | Sc normal | -0.2369 | -1.3743 | 0.5433  | -0.0886 | -0.1882 | -0.1510 | 0.1478  |
| EDRN 70           | Sc normal | 1.0076  | 0.7929  | 0.8655  | -0.1593 | 0.7601  | 0.9545  | -0.1568 |
| EDRN 71           | Sc normal | 0.3972  | -0.1641 | -0.3593 | 0.8124  | 0.4788  | -0.4868 |         |
| EDRN 72           | Sc normal | 0.4853  | -1.0124 | 0.4420  | -0.4375 | -0.2159 | -0.2621 | -0.3540 |
| EDRN 73           | Early CRC | 1.7109  | 1.2787  | 1.5366  | 0.4424  | 1.8125  | 1.4207  | 0.6651  |
| EDRN 74           | Early CRC | 0.3258  | -0.2325 | -0.5220 |         | 1.4997  | 0.4520  | 0.3880  |
| EDRN 75           | Early CRC | 0.6864  | 1.3300  | 0.5600  | 0.5183  | 1.2208  | 0.4405  | 0.0454  |
| EDRN 76           | Early CRC | 2.0012  | 1.1432  | 1.8412  | 0.2502  | 1.7107  | 1.8078  | -0.3167 |
| EDRN 77           | Late CRC  | 2.7238  | -0.8290 | 1.7352  | -1.0708 | 1.6963  | 1.4269  | -1.1273 |
| EDRN 78           | Late CRC  | 0.8353  | -0.0907 | 1.7832  | 0.3337  | 1.2676  | -0.4447 | 0.2497  |
| EDRN 79           | Late CRC  | 0.9450  | -0.6493 | 0.2503  | 0.3695  | 1.5986  | -1.0048 | 0.4514  |
| EDRN 80           | Late CRC  | 0.4945  | 0.4285  | -0.4882 | 0.1709  | 1.5369  |         | -0.4171 |
| EDRN 81           | A-Adenoma | 0.4948  | 0.6724  | 0.0667  | 0.0209  | 0.9998  |         | 0.5432  |
| EDRN 82           | A-Adenoma | 0.7341  | -0.0806 |         | 0.6936  | 1.7443  | -0.6652 | 0.4127  |
| EDRN 83           | A-Adenoma | 0.2569  | 0.4938  | -0.2301 | 0.1883  | 1.4318  | 0.3018  | 0.5582  |
| EDRN 84           | A-Adenoma | -0.6963 | -2.5440 | -1.6880 | -0.7146 | 0.7002  | -0.7318 | -0.3172 |
| EDRN 85           | Adenomas  | 0.5218  | -0.6743 | -0.1113 | 0.2589  | 1.0716  | 0.0004  | -0.4808 |
| EDRN 86           | Adenomas  | -0.1208 | -0.8602 | -0.3746 | -0.4765 | 0.7942  | -0.4534 | -0.3463 |
| EDRN 87           | Adenomas  | 0.2782  | 1.1241  | 0.4659  | 0.8322  | 1.1017  | -0.1572 | 0.1461  |
| EDRN 88           | Adenomas  | 0.7785  | 0.5936  | 0.4264  | 0.3772  | 1.4954  | 0.9775  | 0.4295  |
| EDRN 89           | Sv normal | -0.2825 | -1.3492 | -0.2607 |         | 0.1306  | -0.2431 | -1.5985 |
| EDRN 90           | Sv normal | 0.8153  | -0.2789 | -0.2265 | -0.5395 | 0.1231  | 0.2782  | -1.7439 |
| EDRN 91           | Sv normal | 0.4091  | 1.0999  | -0.0013 | -0.6524 | 0.5512  | -0.0214 | -0.1856 |
| EDRN 92           | Sv normal | 0.9515  | -1.8849 | 0.8516  |         | 1.1085  |         | -0.7637 |
| EDRN 93           | Sc normal | 0.7574  | -0.3407 | 0.4327  | -0.7953 | 0.6463  | 0.7655  | -0.2785 |
| EDRN 94           | Sc normal | -0.4891 | -1.3979 | -0.0636 | -2.8405 | -0.7789 | -0.3627 | -0.7700 |
| EDRN 95           | Sc normal | -0.2181 | -0.3458 | 1.5718  |         | 0.3318  | 0.1340  | 0.2754  |
| EDRN 96           | Sc normal | -2.3491 | -1.1603 |         | -3.5488 | -3.7072 | -0.9822 | -3.9644 |
| EDRN 97           | Early CRC | 0.4947  | 1.8898  | 0.1745  | -0.4112 | 1.3373  | 0.2067  | -0.1787 |
| EDRN 98           | Early CRC | 1.4432  | 1.7964  | 1.0403  | 0.2027  | 2.2790  | 1.3298  | 0.5497  |
| EDRN 99           | Early CRC | -0.0609 | -1.2338 | -0.5783 | -1.0464 | -0.2825 | -0.0640 | -0.8982 |
| EDRN 100          | Early CRC | 0.2820  | 2.1020  | 0.1027  | 0.1652  | 1.3345  | -0.0869 | -0.0594 |
| EDRN 101          | Late CRC  | 1.1307  | 1.0813  | 0.8323  | -0.0685 | -0.0395 | -0.0441 | 0.1097  |
| EDRN 102          | Late CRC  | 0.4329  | 0.6632  | 0.6906  | 0.0635  | 2.4139  | -0.7745 | 0.3466  |
| EDRN 103          | Late CRC  | -0.1290 | 0.4707  | 0.4346  | -1.2483 | 0.3197  |         | -1.1106 |
| EDRN 104          | Late CRC  | 0.3263  | -1.2096 | 0.5331  | -0.0002 | 0.4708  | -0.0940 | -0.0774 |
| EDRN 105          | A-Adenoma | 0.5941  | 1.7431  | -0.2585 | 0.5251  | 1.9704  | 0.7217  | -0.1818 |
| EDRN 106          | A-Adenoma | 0.8589  | -0.6445 | 1.5092  | 0.0728  | 0.8396  | 0.0846  | -0.1511 |
| EDRN 107          | A-Adenoma | 1.2934  | -1.0151 | -0.2712 | -0.0605 | 1.2168  |         | -0.5708 |
| EDRN 108          | A-Adenoma | 1.2773  | -1.1818 | -0.5157 | -0.0585 | 1.6008  | 1.6262  | 0.0432  |
| EDRN 109          | Adenomas  | 0.5072  | 0.6423  | -0.2918 | -0.4079 | 1.5534  | -0.0125 | 0.5445  |
| EDRN 110          | Adenomas  | -0.1675 | -0.8678 | 0.6670  | -1.2732 | 0.0759  | 0.0755  | -0.1041 |
| EDRN 111          | Adenomas  | 2.1137  | 1.1038  | 1.0435  | -0.3390 | 1.9302  | 1.1028  | 1.1691  |
| EDRN 112          | Adenomas  | -2.2992 | -2.9565 | -1.0008 | -1.0630 | -2.0525 | -1.4471 | -3.6279 |

| Sample ID         | Status    | CD44    | CD8a    | CDC25C  | CDK4    | CHEK1   | CSMD3   | EDNRA   |
|-------------------|-----------|---------|---------|---------|---------|---------|---------|---------|
| Confirmed in EDRN |           | v       |         |         |         | v       |         |         |
| EDRN 113          | Sv normal | 0.7274  | -0.5774 | 0.1937  | -0.4272 | 0.6556  | 0.4853  | -0.4013 |
| EDRN 114          | Sv normal | 1.2089  | 0.2709  | 1.3445  | -0.0579 | 0.7962  | 0.4806  | 0.0276  |
| EDRN 115          | Sv normal | 0.5118  | -1.0544 | 0.6670  | -0.7893 | 1.0191  | 0.4037  |         |
| EDRN 116          | Sv normal |         | -2.1345 | 0.0215  | -0.5187 | 0.1018  | 0.6115  | -0.4245 |
| EDRN 117          | Sc normal | 0.7493  | 0.0817  | 0.3012  | -0.2359 | 1.1316  | -0.5472 | -0.4402 |
| EDRN 118          | Sc normal | 0.7118  | -0.8166 | 0.3500  | -0.4307 | 1.2904  | -0.0552 | -0.1862 |
| EDRN 119          | Sc normal | -0.2790 | -1.6283 | 0.4964  | -0.0488 | 0.8337  | -1.0241 | -1.3516 |
| EDRN 120          | Sc normal | -0.4078 | -1.0789 | 0.7647  | -0.4954 | -0.7089 | -0.0496 | -0.6498 |
| EDRN 121          | Early CRC | 0.6530  | -0.5174 | -0.3761 | -1.7563 | 1.9218  | -0.7006 | -0.7312 |
| EDRN 122          | Early CRC | -0.2625 | -0.5147 | -0.3484 | -0.2845 | 0.9564  | -1.3694 | -0.7976 |
| EDRN 123          | Early CRC | 0.6800  | 1.2002  | 0.8774  | 0.0267  | 0.9042  | -0.6442 | -0.2207 |
| EDRN 124          | Early CRC | 0.5729  | -0.7486 | 0.1333  | 0.7338  | 1.6400  | 0.6758  | 0.1028  |
| EDRN 125          | Late CRC  | 1.2797  | 0.4110  | 0.0522  | -0.0506 | 1.4683  | -0.4557 | -0.9170 |
| EDRN 126          | Late CRC  | -0.0062 | -0.2866 | 0.4356  |         | -0.3438 | 0.0546  | 0.0211  |
| EDRN 127          | Late CRC  | 0.8952  | 1.4883  | -0.0450 | -0.2586 | 0.8262  | -0.4632 | 0.2249  |
| EDRN 128          | Late CRC  | 0.9477  |         | 0.3412  | -1.2837 | 0.4293  | 0.0659  | 0.1148  |
| EDRN 129          | A-Adenoma | 1.7901  | 1.7902  |         | -0.9018 | 0.5934  | 0.6070  | 0.1728  |
| EDRN 130          | A-Adenoma | 0.6635  | 0.8160  | 1.1057  | -0.4765 | 2.6008  | 0.4182  | 0.2281  |
| EDRN 131          | A-Adenoma | 0.6546  | -0.1536 | -0.0364 | -0.7732 | 1.2636  | 0.1914  | -0.7865 |
| EDRN 132          | A-Adenoma | 0.9710  | 0.1426  | 0.3677  | -0.9419 | 0.4089  | 0.2181  | -0.2662 |
| EDRN 133          | Adenomas  | 1.4491  | -1.0120 | 3.1201  | -1.0560 | 0.7961  | 1.4581  | -0.5550 |
| EDRN 134          | Adenomas  | 1.1923  | -1.2889 | 0.1148  | -0.5004 | 0.9627  | 0.9347  | -0.6386 |
| EDRN 135          | Adenomas  | 0.8638  | 0.7161  | 0.7199  | -0.7687 | 1.1639  | 0.9418  | -1.2741 |
| EDRN 136          | Adenomas  | 0.4344  | -0.8508 | -2.4453 | 0.5273  | 0.2856  | -1.2718 | -0.2358 |
| EDRN 137          | Sv normal | -0.0573 | -0.3679 | 0.9083  | -0.2199 | 0.4608  | 0.0593  | 0.2838  |
| EDRN 138          | Sv normal | -0.5069 | -1.5529 | 0.8162  | 0.0014  | 0.5383  | 0.8813  | -0.4487 |
| EDRN 139          | Sv normal | 0.5801  | -0.3211 | 0.3586  | 1.1440  | 0.1125  | 1.0796  | -0.8294 |
| EDRN 140          | Sv normal | 0.0781  | -0.0617 | 1.6292  | -0.4415 | 0.6428  | 0.6394  | 1.1962  |
| EDRN 141          | Sc normal | -0.0901 | -0.8887 | 0.1946  | -0.1720 | 0.2400  | 0.2061  | 0.0802  |
| EDRN 142          | Sc normal | -1.1159 | -1.6593 | -0.4448 | 1.1157  | 0.2841  | -1.3139 | 0.3446  |
| EDRN 143          | Sc normal | 0.1488  | -0.1022 | 1.3429  | -1.5887 | 0.8778  | 0.3787  | -2.1768 |
| EDRN 144          | Sc normal | -0.2509 | -0.7263 | -0.9070 | 0.2166  | 1.0539  | 0.7672  | -1.0367 |
| EDRN 145          | Early CRC | 0.5196  | 2.7915  | 1.2387  | 1.0993  | 0.6886  | 0.6287  | 1.0680  |
| EDRN 146          | Early CRC | 0.4067  | -0.7058 | 0.8854  | 0.6370  | 0.9974  | -0.7991 | 0.0702  |
| EDRN 147          | Early CRC | 1.9474  |         |         | 0.9009  | 1.3684  | 1.2197  | -0.2003 |
| EDRN 148          | Early CRC | 0.6641  | -0.7749 | 1.9921  | 0.1261  | 0.9311  | 0.3177  |         |
| EDRN 149          | Late CRC  | 0.3547  |         | 2.5733  | 0.2004  | 0.3458  | 1.2064  | -0.4672 |
| EDRN 150          | Late CRC  | 0.7798  | 0.7276  | 2.6892  | 0.1311  | 1.2450  | 0.1900  | -0.5448 |
| EDRN 151          | Late CRC  | 0.8587  | -0.7924 | -0.5093 | 0.3692  | 1.8877  | 0.0444  | 0.2722  |
| EDRN 152          | Late CRC  |         | -1.6360 | 1.3306  | 0.0087  | 1.8993  | 0.3134  | -0.5907 |
| EDRN 153          | A-Adenoma | -0.5873 |         | -3.9030 | -1.2375 | -0.1167 | 0.1099  | -1.3458 |
| EDRN 154          | A-Adenoma | 0.3907  | -0.3613 | -1.2165 |         | 0.7050  | 2.3430  | -0.2749 |
| EDRN 155          | A-Adenoma | 1.0290  | -0.6486 | 1.9738  | -0.1050 | 0.7353  | 0.1546  | -0.1239 |
| EDRN 156          | A-Adenoma | -0.1959 | -1.4099 |         | -0.4857 | 0.9934  | -0.5152 |         |
| EDRN 157          | Adenomas  | 0.5889  | -0.1698 | 0.8456  | -0.7068 | 1.9464  | 0.2780  | 0.9106  |

| Sample ID         | Status    | CD44    | CD8a    | CDC25C  | CDK4    | CHEK1   | CSMD3   | EDNRA   |
|-------------------|-----------|---------|---------|---------|---------|---------|---------|---------|
| Confirmed in EDRN |           | v       |         |         |         | v       |         |         |
| EDRN 158          | Adenomas  |         |         | 0.6967  | -2.0059 | 1.2260  | 0.7804  | 1.1627  |
| EDRN 159          | Adenomas  | 0.3752  | -1.9749 | -1.7635 |         | 0.5006  | -1.5084 | 0.2374  |
| EDRN 160          | Adenomas  | 0.3246  | -1.2992 |         | -0.5654 | 0.6998  | 0.0865  | -1.1224 |
| EDRN 161          | Sv normal | 0.5686  | -0.1470 | -0.0202 | -2.7762 | -0.4771 | 0.3890  | -1.1216 |
| EDRN 162          | Sv normal | -0.8282 | -1.5391 | -0.1552 | -0.2437 | 1.2421  | -0.8756 | -0.1313 |
| EDRN 163          | Sv normal | 0.5337  | 1.6473  | -0.0705 | -1.5781 | -1.7272 | -0.1798 | -1.0232 |
| EDRN 164          | Sv normal | 1.0832  | -0.2664 | 0.5521  | -0.3813 | 0.6211  | -0.6150 | -0.6695 |
| EDRN 165          | Sc normal | 0.6385  | -0.9725 | 0.2625  | -0.6829 | 0.4876  | 0.3214  | -1.3682 |
| EDRN 166          | Sc normal | -0.5853 | 0.8923  | -0.4658 | 0.6345  |         | -0.8236 | -1.0902 |
| EDRN 167          | Sc normal | 1.2523  | 1.5513  | -0.4805 | -0.6012 | 2.6196  | 0.0983  | -0.5238 |
| EDRN 168          | Sc normal |         | 0.7952  | 0.7879  | -0.2039 | 0.7815  | 0.1937  | -0.7724 |
| EDRN 169          | Early CRC | 0.9908  | 2.9563  | -0.0684 | 0.2876  | 1.2589  | 1.4522  | 1.4140  |
| EDRN 170          | Early CRC | 0.8468  | 0.3577  | -1.7040 | -0.4158 | 1.2248  | -0.7976 | -0.8440 |
| EDRN 171          | Late CRC  | 1.0562  | -0.1889 | 1.3713  | -0.3050 | 0.4773  | -0.1789 | -0.3190 |
| EDRN 172          | Late CRC  | 0.6984  | 1.0602  | -0.6269 | 1.2734  | 1.1793  |         | 0.7975  |
| EDRN 173          | A-Adenoma | 0.7795  | -1.1443 | 0.8839  | -0.9926 | 0.1147  |         | 0.1240  |
| EDRN 174          | A-Adenoma | -0.0738 | -0.9059 | 1.6178  | -1.3689 | 1.1632  | -0.0721 | -0.3242 |
| EDRN 175          | Adenomas  | 0.1556  | -1.7123 | -0.1757 |         | 0.8453  |         | -1.6753 |
| EDRN 176          | Adenomas  | 0.0940  | -0.5780 | -0.0810 | 1.2214  | 1.1585  | 2.0180  | 0.0945  |
| EDRN 177          | Sv normal | 0.8269  | 1.0930  | 2.7459  | 0.1770  | 1.3213  |         | -0.5766 |
| EDRN 178          | Sv normal | 1.0478  | -0.0814 | 0.7743  | -1.1771 | 0.8158  | 0.9723  | -0.9032 |
| EDRN 179          | Sc normal | -0.8758 | -0.7984 | -1.8411 | -1.6240 | 0.0140  | -2.2921 | -2.2506 |
| EDRN 180          | Sc normal | 0.2358  | -2.3350 | 1.2292  | -0.8093 | 0.4705  | -0.0570 | 0.3904  |



| Sample ID         | Status  | EGFR    | EGFR     | ERCC5    | EVI1     | FLT3     | FN1      | FN1    |
|-------------------|---------|---------|----------|----------|----------|----------|----------|--------|
| Confirmed in EDRN |         | v       |          | v        |          | v        | v        | v      |
| CHS 1             | Control | -0.1708 | -8.3787  | -12.6127 | -17.7578 | -12.9276 | -9.6018  | 6.1463 |
| CHS 2             | Cancer  | -0.1713 | -9.6067  | -12.5532 | -17.7228 | -13.1424 | -10.2501 | 5.3568 |
| CHS 3             | Cancer  | 0.3458  | -10.7461 | -12.8429 | -19.9245 | -13.1795 | -9.5540  | 5.3839 |
| CHS 4             | Control | -0.1944 | -9.7930  | -13.2611 | -17.1482 | -13.3237 | -12.2947 | 4.8970 |
| CHS 5             | Control | -0.0570 | -9.1241  | -12.0447 | -17.0051 | -13.6511 | -9.8205  | 6.7568 |
| CHS 6             | Cancer  | -0.1484 | -10.0052 | -13.0191 | -16.6959 | -12.8411 | -10.2157 | 5.5713 |
| CHS 7             | Control | 0.4897  | -10.1441 | -11.4050 | -16.8252 | -13.3006 | -10.5292 | 5.1772 |
| CHS 8             | Cancer  | 0.9927  | -10.1297 | -10.9528 | -16.5111 | -13.5642 | -9.6530  | 5.6429 |
| CHS 9             | Cancer  | -0.0484 | -9.2855  | -12.4267 | -17.7408 | -12.4511 | -8.8677  | 5.8556 |
| CHS 10            | Control | -1.7900 | -10.0032 | -12.6740 | -16.6075 | -12.9214 | -9.0011  | 6.0410 |
| CHS 11            | Control | -0.9542 | -11.1379 | -15.1049 | -17.9251 | -13.4258 | -11.2699 | 3.9606 |
| CHS 12            | Cancer  | -0.2490 | -10.2386 | -12.5648 | -17.2256 | -12.4107 | -9.8626  | 5.3511 |
| CHS 13            | Cancer  | -0.1194 | -10.5409 | -11.6194 | -18.8105 | -11.2930 | -10.1313 | 6.1156 |
| CHS 14            | Control | -0.3061 | -10.6488 | -12.3248 | -18.4667 | -13.0077 | -9.2777  | 4.8933 |
| CHS 15            | Control | -0.6585 | -10.2119 | -12.5238 | -18.3221 | -12.4048 | -11.0385 | 4.2729 |
| CHS 16            | Cancer  | -1.1967 | -9.7269  | -12.2924 | -19.0514 | -12.2965 | -8.9065  | 4.8422 |
| CHS 17            | Cancer  | -1.6906 | -9.7668  | -11.1093 | -17.8713 | -12.3626 | -10.9152 | 5.2856 |
| CHS 18            | Control | -0.5702 | -9.0451  | -12.2071 | -17.3095 | -13.8770 | -11.7317 | 5.4423 |
| CHS 19            | Cancer  | -0.8138 | -10.2219 | -12.5012 | -17.8896 | -12.2569 | -10.0861 | 6.0849 |
| CHS 20            | Control | -2.0527 | -11.6142 | -14.2727 | -18.5779 | -12.3711 | -10.9171 | 4.0783 |
| CHS 21            | Cancer  | 0.5949  | -9.7757  | -9.7792  | -18.3327 | -12.6085 | -9.4976  | 5.8862 |
| CHS 22            | Control | -0.2482 | -10.4891 | -13.3750 | -17.9653 | -13.6693 | -10.8924 | 4.6216 |
| CHS 23            | Cancer  | -1.6142 | -10.5222 | -11.8941 | -18.0764 | -12.5995 | -8.1221  | 5.7561 |
| CHS 24            | Control | -5.2307 | -14.0391 | -16.1287 | -21.6638 | -16.5131 | -13.8909 | 3.2094 |
| CHS 25            | Cancer  | -1.3531 | -10.2284 | -12.9900 | -18.6073 | -12.8063 | -10.0108 | 4.9570 |
| CHS 26            | Control | -1.3460 | -10.5551 | -11.7225 | -18.8063 | -12.7585 | -10.5107 | 4.9239 |
| CHS 27            | Cancer  | -1.5584 | -11.2543 | -12.3165 | -19.7880 | -13.4507 | -10.7642 | 4.8109 |
| CHS 28            | Control | -0.3858 | -9.1776  | -11.6717 | -17.1927 | -12.5941 | -10.0146 | 6.3033 |
| CHS 29            | Cancer  | -0.1312 | -9.9023  | -12.5427 | -18.8320 | -12.4187 | -9.4848  | 4.2905 |
| CHS 30            | Control | -1.4034 | -10.4569 | -12.7522 | -18.4719 | -12.7483 | -12.1750 | 4.2587 |
| CHS 31            | Control | -1.0026 | -9.2105  | -13.5519 | -18.2282 | -13.1197 | -10.3639 | 6.4083 |
| CHS 32            | Cancer  | -0.8327 | -9.5080  | -13.4130 | -18.0469 | -13.5706 | -10.0384 | 5.3881 |
| CHS 33            | Cancer  | -0.5175 | -9.7183  | -12.2324 | -18.2706 | -12.6278 | -11.5273 | 6.4492 |
| CHS 34            | Control | -1.7251 | -10.3246 | -13.0803 | -18.0562 | -13.3221 | -11.0848 | 4.3228 |
| CHS 35            | Control | -0.3628 | -10.6825 | -13.1627 | -17.4926 | -13.7311 | -9.2629  | 4.0947 |
| CHS 36            | Cancer  | -0.9550 | -10.6638 | -12.6607 | -17.9290 | -12.6679 | -9.0770  | 4.6227 |
| CHS 37            | Cancer  | -0.8997 | -10.5577 | -12.6593 | -17.4240 | -13.2721 | -9.4324  | 5.1463 |
| CHS 38            | Control | -0.8121 | -10.8399 | -12.4086 | -17.5648 | -13.9441 | -10.6185 | 4.4635 |
| CHS 39            | Control | -1.2195 | -10.9243 | -13.1618 | -18.0555 | -13.9445 | -10.1119 | 4.4884 |
| CHS 40            | Cancer  | 0.3804  | -9.8910  | -12.0684 | -16.0213 | -13.0306 | -10.5510 | 5.8283 |
| CHS 41            | Control | -0.0960 | -10.5910 | -13.4904 | -17.4591 | -12.6877 | -10.5940 | 5.0838 |
| CHS 42            | Cancer  | 0.1713  | -10.2634 | -11.9841 | -17.4884 | -13.3319 | -10.1745 | 5.1258 |
| CHS 43            | Control | 0.2537  | -9.2483  | -11.9821 | -18.3680 | -13.0186 | -10.7695 | 8.2612 |
| CHS 44            | Cancer  | -0.1351 | -10.1324 | -12.5531 | -17.9384 | -12.6958 | -9.9582  | 5.6212 |
| CHS 45            | Control | -0.4950 | -10.9899 | -12.6169 | -17.7571 | -13.1701 | -10.1897 | 5.1552 |

| Sample ID         | Status  | EGFR    | EGFR     | ERCC5    | EVI1     | FLT3     | FN1      | FN1    |
|-------------------|---------|---------|----------|----------|----------|----------|----------|--------|
| Confirmed in EDRN |         | v       |          | v        |          | v        | v        | v      |
| CHS 46            | Cancer  | -0.5478 | -9.1237  | -11.6075 | -17.8107 | -11.7340 | -11.0316 | 6.2990 |
| CHS 47            | Cancer  | -0.0839 | -10.5790 | -11.9503 | -18.3303 | -12.6904 | -10.3156 | 5.0285 |
| CHS 48            | Control | -0.8043 | -10.3724 | -12.9105 | -17.4876 | -13.0636 | -8.2667  | 5.2972 |
| CHS 49            | Cancer  | -0.2203 | -10.4656 | -12.5521 | -17.5549 | -12.3175 | -8.7184  | 5.1426 |
| CHS 50            | Control | -0.7205 | -10.6213 | -12.8870 | -17.7831 | -13.9031 | -10.3871 | 6.2004 |
| CHS 51            | Cancer  | -0.2668 | -10.0974 | -13.6728 | -17.3337 | -11.9658 | -9.7588  | 5.6555 |
| CHS 52            | Control | -1.3484 | -10.4365 | -13.0915 | -19.3230 | -14.6199 | -11.0736 | 5.1400 |
| CHS 53            | Control | -1.0235 | -11.0617 | -12.8832 | -18.8758 | -13.1565 | -11.3955 | 5.7765 |
| CHS 54            | Cancer  | -0.2644 | -9.4521  | -12.7956 | -16.8171 | -12.2696 | -9.3442  | 6.2984 |
| CHS 55            | Cancer  | -1.2783 | -10.9614 | -13.0206 | -18.3898 | -12.6133 | -9.5143  | 3.9976 |
| CHS 56            | Control | -1.2521 | -11.0879 | -12.8191 | -19.9113 | -12.4770 | -11.6539 | 4.5082 |
| CHS 57            | Control | -1.3632 | -10.7434 | -13.0259 | -18.5345 | -12.2888 | -10.3199 | 5.3034 |
| CHS 58            | Cancer  | -0.7951 | -10.8832 | -12.9214 | -17.6229 | -12.4037 | -10.7351 | 5.9997 |
| CHS 59            | Cancer  | -0.9757 | -10.7738 | -11.3189 | -19.3181 | -12.6661 | -10.9924 | 4.7292 |
| CHS 60            | Control | -0.8056 | -9.6129  | -12.9612 | -17.5268 | -13.6947 | -9.2880  | 5.8301 |
| CHS 61            | Cancer  | 1.1645  | -9.2398  | -12.6586 | -14.8711 | -13.0777 | -9.6656  | 5.7842 |
| CHS 62            | Control | -1.5137 | -11.5486 | -14.3949 | -19.8880 | -14.0822 | -11.0473 | 5.1365 |
| CHS 63            | Cancer  | 1.4608  | -8.6820  | -11.0899 | -14.5976 | -12.0742 | -10.3651 | 7.3358 |
| CHS 64            | Control | -2.3311 | -11.9775 | -13.1193 | -18.4311 | -12.9858 | -11.6246 | 4.0854 |
| CHS 65            | Cancer  | 0.4038  | -8.9605  | -11.0526 | -16.6280 | -12.1032 | -9.5990  | 6.1027 |
| CHS 66            | Control | -0.0355 | -9.0389  | -11.1369 | -16.9606 | -13.1223 | -9.3708  | 6.2028 |
| CHS 67            | Control | -1.6920 | -11.3095 | -13.7819 | -19.3726 | -14.0183 | -11.0887 | 3.6004 |
| CHS 68            | Cancer  | -1.3314 | -10.1411 | -12.8174 | -17.5709 | -12.7539 | -10.7478 | 4.1014 |
| CHS 69            | Cancer  | -0.4545 | -9.5850  | -11.8461 | -18.7603 | -13.1540 | -8.8939  | 4.7741 |
| CHS 70            | Control | -0.1628 | -9.2755  | -12.0704 | -18.1306 | -13.0374 | -10.0145 | 4.8183 |
| CHS 71            | Cancer  | -0.1174 | -9.0529  | -11.6107 | -17.9461 | -14.4377 | -9.7400  | 5.5663 |
| CHS 72            | Control | -0.9385 | -10.1871 | -11.9617 | -19.2788 | -13.1767 | -10.9889 | 4.5394 |
| CHS 73            | Control | -0.7329 | -11.7510 | -14.1042 | -18.1269 | -13.7874 | -10.2789 | 3.8908 |
| CHS 74            | Cancer  | -0.3473 | -9.5660  | -12.1739 | -19.4632 | -12.2960 | -8.9882  | 6.4048 |
| CHS 75            | Cancer  | -0.1541 | -8.9193  | -11.3180 | -18.0010 | -12.6021 | -11.7975 | 5.4898 |
| CHS 76            | Control | -1.7603 | -11.5400 | -12.7546 | -17.9561 | -12.9662 | -11.0128 | 2.9466 |
| CHS 77            | Control | -2.2201 | -11.7825 | -12.3664 | -20.2882 | -13.5083 | -11.7985 | 2.9315 |
| CHS 78            | Cancer  | -0.6704 | -10.1451 | -10.3128 | -18.5601 | -12.4288 | -9.4868  | 5.0638 |
| CHS 79            | Cancer  | 0.3759  | -9.9316  | -11.6255 | -18.0248 | -12.3713 | -9.9524  | 8.9189 |
| CHS 80            | Control | 0.4223  | -8.8871  | -11.7844 | -18.6726 | -12.5878 | -8.3170  | 7.1507 |
| CHS 81            | Control | -0.6551 | -10.4612 | -14.9349 | -18.0639 | -13.2198 | -10.6510 | 5.7205 |
| CHS 82            | Cancer  | -0.9798 | -10.1918 | -11.8202 | -17.8030 | -13.1807 | -10.5274 | 4.8217 |
| CHS 83            | Cancer  | 0.1291  | -9.2099  | -12.9418 | -17.8490 | -12.5666 | -9.3414  | 6.0707 |
| CHS 84            | Control | -1.3878 | -9.9622  | -12.8507 | -17.8172 | -13.7631 | -10.2421 | 5.9957 |
| CHS 85            | Cancer  | -0.4665 | -11.3527 | -12.2340 | -17.8307 | -12.5033 | -10.1067 | 5.0115 |
| CHS 86            | Control | -1.0640 | -10.9892 | -13.3649 | -17.8413 | -13.4534 | -9.5114  | 3.9652 |
| CHS 87            | Control | -1.9746 | -10.7217 | -12.3137 | -18.1099 | -13.4034 | -11.4037 | 5.5245 |
| CHS 88            | Cancer  | -1.7440 | -9.7235  | -13.3927 | -16.1979 | -14.0628 | -11.2575 | 4.7751 |
| CHS 89            | Control | -0.9734 | -9.9313  | -13.0888 | -17.9953 | -11.3538 | -9.5239  | 4.7535 |
| CHS 90            | Cancer  | 0.3703  | -9.7895  | -12.4719 | -17.3700 | -12.7371 | -11.7290 | 5.5259 |

| Sample ID Status  | EGFR    | EGFR     | ERCC5    | EVI1     | FLT3     | FN1      | FN1    |
|-------------------|---------|----------|----------|----------|----------|----------|--------|
| Confirmed in EDRN | v       |          | v        |          | v        | v        | v      |
| CHS 91 Cancer     | 0.0234  | -10.0713 | -12.8624 | -17.0774 | -12.5151 | -9.6954  | 6.6998 |
| CHS 92 Control    | -0.2362 | -10.5081 | -12.3954 | -18.6185 | -14.0590 | -9.2426  | 5.8130 |
| CHS 93 Control    | 0.1371  | -10.1236 | -13.1764 | -17.7254 | -13.8591 | -11.1198 | 4.3717 |
| CHS 94 Cancer     | -1.4371 | -9.2497  | -11.8374 | -16.7262 | -13.7040 | -11.6718 | 5.4102 |
| CHS 95 Control    | -0.3435 | -10.0631 | -12.1801 | -17.2965 | -12.2860 | -9.0892  | 4.6938 |
| CHS 96 Cancer     | -0.1728 | -10.3240 | -13.1844 | -18.0120 | -13.1844 | -9.5826  | 4.6792 |
| CHS 97 Cancer     | -0.2607 | -9.8641  | -12.4835 | -18.4140 | -11.5287 | -10.2599 | 5.5756 |
| CHS 98 Control    | -1.0864 | -10.9303 | -15.3395 | -20.5955 | -13.1753 | -11.8125 | 4.2584 |
| CHS 99 Cancer     | -1.3184 | -10.0956 | -11.7869 | -19.8271 | -12.4920 | -9.7515  | 6.5467 |
| CHS 100 Control   | 0.4217  | -9.9469  | -11.6967 | -17.5601 | -11.6037 | -10.1938 | 4.3295 |
| CHS 101 Cancer    | -0.4358 | -10.1882 | -11.0625 | -18.2218 | -11.9156 | -10.7701 | 6.3138 |
| CHS 102 Control   | -0.7387 | -9.7820  | -10.2690 | -19.4075 | -12.5262 | -10.1467 | 6.0591 |
| CHS 103 Cancer    | -0.9793 | -10.1483 | -11.7141 | -18.9989 | -12.5185 | -10.0862 | 5.3908 |
| CHS 104 Control   | -0.4303 | -10.7142 | -13.5932 | -16.9664 | -14.4284 | -10.6879 | 6.0105 |
| CHS 105 Cancer    | -0.6603 | -9.5617  | -12.2436 | -17.6426 | -12.8467 | -10.5278 | 5.0405 |
| CHS 106 Control   | -0.7415 | -11.0355 | -13.5331 | -17.8769 | -13.8924 | -10.9421 | 4.9024 |
| CHS 107 Cancer    | -0.3728 | -10.8011 | -12.9031 | -18.2750 | -13.2246 | -11.4119 | 5.5425 |
| CHS 108 Control   | -0.4809 | -9.5404  | -11.7272 | -17.9479 | -11.0155 | -9.0209  | 5.8181 |
| CHS 109 Control   | -1.3190 | -10.4886 | -13.2990 | -17.9047 | -15.0195 | -10.5667 | 4.2437 |
| CHS 110 Cancer    | -1.1574 | -10.9852 | -13.1067 | -19.2138 | -13.0382 | -9.2954  | 4.5065 |
| CHS 111 Control   | -0.9918 | -11.1191 | -12.5006 | -19.2007 | -13.5575 | -10.6428 | 4.0982 |
| CHS 112 Cancer    | 0.3864  | -9.2550  | -13.4640 | -15.6092 | -13.9912 | -9.0602  | 6.4720 |
| CHS 113 Control   | -0.1892 | -9.2227  | -11.9817 | -16.9035 | -12.0135 | -10.3020 | 5.1158 |
| CHS 114 Cancer    | -1.2079 | -10.6246 | -12.8590 | -16.8694 | -13.6553 | -9.4747  | 5.0722 |
| CHS 117 Control   | -1.0475 | -11.1715 | -12.7652 | -17.5324 | -13.4623 | -10.4387 | 4.6235 |
| CHS 118 Cancer    | -0.4130 | -9.7033  | -13.3012 | -16.6289 | -13.7113 | -10.2739 | 6.2511 |
| CHS 119 Cancer    | -0.8559 | -9.7738  | -12.2466 | -16.9068 | -13.9713 | -10.1109 | 4.9077 |
| CHS 120 Control   | -0.6609 | -9.8103  | -12.4891 | -16.9716 | -12.7781 | -10.0237 | 4.9978 |
| CHS 121 Control   | -1.1437 | -11.1935 | -13.1702 | -17.7653 | -13.9823 | -10.5092 | 5.6285 |
| CHS 122 Cancer    | -0.4648 | -10.8045 | -12.4014 | -17.2366 | -12.4728 | -9.1641  | 5.1797 |
| CHS 123 Cancer    | -1.4208 | -11.0769 | -10.7888 | -18.6209 | -12.4397 | -9.5345  | 4.4460 |
| CHS 124 Control   | -0.7027 | -10.2067 | -12.0778 | -17.5205 | -12.8321 | -9.9392  | 4.7435 |
| CHS 125 Cancer    | -2.1682 | -10.6758 | -13.5235 | -17.8135 | -13.4207 | -10.3623 | 4.5967 |
| CHS 126 Control   | -0.8185 | -10.5465 | -11.7077 | -17.9562 | -13.0542 | -9.5119  | 6.0264 |
| CHS 127 Cancer    | 0.4119  | -9.5875  | -11.5426 | -15.8329 | -10.8425 | -9.0080  | 8.0668 |
| CHS 128 Control   | -1.9901 | -11.3603 | -14.0498 | -20.6000 | -14.6871 | -10.8578 | 4.3258 |
| CHS 129 Control   | -1.9514 | -11.8238 | -13.6306 | -20.0500 | -14.2534 | -11.4274 | 3.9479 |
| CHS 130 Cancer    | -0.9760 | -12.2028 | -13.8305 | -19.0878 | -13.0637 | -10.3666 | 3.8816 |
| CHS 131 Cancer    | 0.1487  | -9.8476  | -12.4308 | -18.5906 | -12.8955 | -10.1307 | 5.0687 |
| CHS 132 Control   | -0.1885 | -9.8727  | -12.2927 | -18.7425 | -12.6380 | -11.1995 | 5.0403 |
| CHS 133 Cancer    | -1.6131 | -10.8890 | -13.7816 | -18.6888 | -13.6015 | -11.4522 | 3.2707 |
| CHS 134 Control   | -0.8761 | -10.2321 | -13.2372 | -17.3591 | -13.9107 | -10.5232 | 3.6891 |
| CHS 135 Cancer    | -0.5565 | -9.9700  | -11.3234 | -17.9271 | -13.2771 | -10.5389 | 5.1063 |
| CHS 136 Control   | 0.1009  | -9.1918  | -11.4570 | -17.9480 | -12.1326 | -9.7264  | 5.6131 |
| CHS 137 Cancer    | -1.6208 | -8.3868  | -13.0690 | -18.4141 | -12.1402 | -9.4283  | 5.3974 |

| Sample ID Status  | EGFR    | EGFR     | ERCC5    | EVI1     | FLT3     | FN1      | FN1     |
|-------------------|---------|----------|----------|----------|----------|----------|---------|
| Confirmed in EDRN | v       |          | v        |          | v        | v        | v       |
| CHS 138 Control   | -0.5041 | -9.8466  | -12.8302 | -17.8574 | -13.1644 | -11.7322 | 5.3578  |
| CHS 139 Cancer    | 0.3147  | -8.6709  | -12.0309 | -16.4928 | -12.5007 | -10.0408 | 5.9990  |
| CHS 140 Control   | 0.1799  | -9.7909  | -12.1316 | -17.8971 | -12.7526 | -10.2743 | 6.8858  |
| CHS 141 Cancer    | 0.4664  | -9.1892  | -12.1809 | -16.2025 | -13.7300 | -10.5188 | 7.1477  |
| CHS 142 Control   | -0.6396 | -10.6733 | -12.7886 | -17.8496 | -13.3977 | -10.5768 | 4.8467  |
| CHS 143 Cancer    | 0.0094  | -9.5778  | -12.8565 | -17.5260 | -13.1360 | -10.1515 | 6.2442  |
| CHS 144 Control   | 0.1413  | -9.5785  | -12.3562 | -17.4476 | -12.0738 | -9.3529  | 6.1191  |
| CHS 145 Cancer    | -0.7456 | -10.0299 | -12.7818 | -17.9855 | -13.7535 | -10.3228 | 5.4972  |
| CHS 146 Control   | -1.0802 | -10.1113 | -12.4516 | -17.4680 | -13.2848 | -10.8736 | 5.0707  |
| CHS 147 Cancer    | -1.0106 | -10.4669 | -12.1728 | -18.2922 | -12.8299 | -10.8802 | 6.3334  |
| CHS 148 Control   | -0.1724 | -9.3958  | -12.0205 | -18.6897 | -12.0373 | -9.8450  | 6.7858  |
| CHS 149 Control   | -1.2747 | -10.4126 | -13.2199 | -18.1474 | -13.3674 | -10.2461 | 4.8889  |
| CHS 150 Cancer    | -0.2690 | -9.6681  | -12.8222 | -17.3211 | -13.5114 | -10.4520 | 6.8717  |
| CHS 151 Control   | -0.1255 | -10.5310 | -13.1656 | -17.6235 | -13.5317 | -9.7812  | 5.8280  |
| CHS 152 Cancer    | 0.2713  | -10.1826 | -12.6807 | -18.5919 | -13.2638 | -10.0776 | 5.6266  |
| CHS 153 Control   | -1.6908 | -9.4461  | -13.0840 | -17.9207 | -13.6511 | -10.1918 | 4.0304  |
| CHS 154 Cancer    | -0.4962 | -10.1887 | -12.3648 | -16.6267 | -12.4637 | -10.2884 | 5.1963  |
| CHS 155 Cancer    | -0.1753 | -10.1547 | -12.5015 | -17.6330 | -11.9192 | -9.1359  | 5.3963  |
| CHS 156 Control   | -0.8648 | -10.4260 | -12.1403 | -18.3535 | -12.0107 | -10.8821 | 4.7577  |
| CHS 157 Cancer    | -0.8344 | -11.2742 | -13.0691 | -18.8438 | -13.2177 | -10.7346 | 4.2522  |
| CHS 158 Control   | -0.1716 | -10.1813 | -12.2716 | -17.8339 | -13.3038 | -10.1549 | 5.5119  |
| CHS 159 Cancer    | -0.8691 | -9.8248  | -11.8093 | -17.3742 | -13.0807 | -10.1029 | 4.2864  |
| CHS 160 Control   | -1.0656 | -11.1698 | -12.4374 | -18.9128 | -13.0393 | -10.2493 | 4.0856  |
| EDRN 1 Early CRC  |         |          | 1.7712   | -1.4492  | 0.6494   | 0.2535   | 1.4288  |
| EDRN 2 Early CRC  | -1.6668 |          |          | -1.1676  | -0.8793  | -1.3241  | -1.3387 |
| EDRN 3 Early CRC  | -0.2492 |          |          | 0.6334   | 1.9999   | 1.5422   |         |
| EDRN 4 Early CRC  | 0.3934  |          | 2.1169   | 1.1928   | 0.5736   | 0.6908   | 1.7956  |
| EDRN 5 Late CRC   | 0.5321  |          | 2.2687   | 1.4425   | 0.4612   | 0.9266   | 1.8194  |
| EDRN 6 Late CRC   | 0.3166  |          | 0.4037   | 1.6192   | 1.0407   | 0.4546   | 0.9796  |
| EDRN 7 Late CRC   | 0.5371  |          | 1.8437   |          | 1.1181   | 0.9886   | 1.0904  |
| EDRN 8 Late CRC   | -0.5465 |          | 1.3396   | 0.5697   | 1.3857   | 0.2098   | 2.3852  |
| EDRN 9 A-Adenoma  | -0.0959 |          | 0.6850   | 0.7805   | 0.2246   | 0.1190   | 0.9167  |
| EDRN 10 A-Adenoma | -0.1522 |          | 2.1143   | 1.2704   | 0.4613   | 0.3687   | 0.3314  |
| EDRN 11 A-Adenoma | 1.0704  |          | 1.9097   | 1.7635   | 0.3735   | 0.0430   | 0.7664  |
| EDRN 12 A-Adenoma | 0.4958  |          | 1.2961   | 1.3352   | 0.7075   | 1.1321   | 1.6390  |
| EDRN 13 Adenomas  | -1.0778 |          | -0.5563  | 1.4989   | 0.3287   | -0.1855  | 1.1990  |
| EDRN 14 Adenomas  | 0.5050  |          | 1.7108   | 2.3140   | 1.2357   | 0.8447   | 3.5755  |
| EDRN 15 Adenomas  | -0.0849 |          | 2.3857   | 1.2070   | 1.0096   | 1.0895   | 1.5130  |
| EDRN 16 Adenomas  |         |          | 1.2723   | 0.8551   | 0.8673   | 0.8880   | 1.5308  |
| EDRN 17 Sv normal | -0.0643 |          | 2.1101   | 0.8862   | 1.1816   | 0.5205   | 0.6036  |
| EDRN 18 Sv normal | -0.3691 |          | 1.8177   | 2.2421   | 0.9308   | 0.7385   | 1.4923  |
| EDRN 19 Sv normal | -0.0326 |          | 0.0859   | 0.3066   | 1.0063   | -0.2005  | -0.0604 |
| EDRN 20 Sv normal | 0.2742  |          | 1.0666   | 1.3585   | 0.3262   | -0.1407  | 0.5252  |
| EDRN 21 Sc normal | 0.1037  |          | 0.3928   | 1.6437   | 0.0731   | -0.8651  | 1.0031  |
| EDRN 22 Sc normal | 0.0371  |          | 1.5824   | 1.2033   | 0.0369   | -0.1903  | -0.0983 |

| Sample ID | Status    | EGFR<br>v | EGFR | ERCC5<br>v | EVI1    | FLT3<br>v | FN1<br>v | FN1<br>v |
|-----------|-----------|-----------|------|------------|---------|-----------|----------|----------|
| EDRN 23   | Sc normal | 0.6011    |      | 0.6903     | 2.4237  | 0.2103    | 0.1095   | 0.4109   |
| EDRN 24   | Sc normal | 0.4422    |      | 2.1989     | 1.3886  | 0.1988    | 0.3693   | 0.5900   |
| EDRN 25   | Early CRC | -1.0940   |      | 1.6254     |         | 0.7977    | 1.2070   | 1.6750   |
| EDRN 26   | Early CRC | 0.0755    |      | 2.5283     | 0.8587  | 1.9504    | 0.9629   | 1.8624   |
| EDRN 27   | Early CRC | -0.5421   |      | -0.0077    | -1.4605 | 0.2174    | -1.8287  | 0.1917   |
| EDRN 28   | Early CRC | 1.0924    |      | 3.2600     | 2.5510  | 2.0281    | 1.4854   | 3.9172   |
| EDRN 29   | Late CRC  | -0.4856   |      | 0.9677     | 1.5257  | 1.1340    | -0.2177  | 1.5227   |
| EDRN 30   | Late CRC  | 0.3676    |      | 3.5859     | 2.4969  | 1.0611    | 1.1588   | 3.1106   |
| EDRN 31   | Late CRC  | 0.2039    |      | 2.4472     | 0.2394  | 0.7823    | -0.0713  | 0.8332   |
| EDRN 32   | Late CRC  | 0.5579    |      |            | 1.6915  | 0.3430    | 0.7486   | 1.0577   |
| EDRN 33   | A-Adenoma | 0.3478    |      | 1.6408     |         | 0.8358    | 1.2956   | 1.1331   |
| EDRN 34   | A-Adenoma | 0.4356    |      | 1.3780     | 2.9423  | 0.4121    | 0.0116   | 0.5615   |
| EDRN 35   | A-Adenoma | 0.1564    |      | 0.5831     | 2.1137  | 0.4070    | 0.6374   | -0.0786  |
| EDRN 36   | A-Adenoma | 0.6737    |      | 2.6404     |         | 1.4083    | 0.9549   | 1.2207   |
| EDRN 37   | Adenomas  | 0.2709    |      | 1.4111     |         | 0.7106    | 0.4829   | 0.1342   |
| EDRN 38   | Adenomas  | 0.4731    |      |            | 2.3872  | 1.1359    | 1.3498   | 2.2021   |
| EDRN 39   | Adenomas  | 0.5624    |      | 2.5297     | 1.0092  | 1.4575    | 0.8725   | -0.0525  |
| EDRN 40   | Adenomas  | -0.7321   |      | -1.3840    | 0.3050  | -3.2823   | -3.3839  | -2.4530  |
| EDRN 41   | Sv normal | 0.3867    |      |            | 1.6581  | 0.4736    | 1.0955   | 2.2101   |
| EDRN 42   | Sv normal | 0.8168    |      |            | 1.7213  | 2.3392    | 1.4967   | 2.0560   |
| EDRN 43   | Sv normal | 0.1443    |      |            | 1.0070  | 1.5683    | 0.2149   | 0.5994   |
| EDRN 44   | Sv normal | -0.3610   |      | 2.3708     | 0.2376  | 0.3681    | 0.1858   | 0.6261   |
| EDRN 45   | Sc normal | -0.1020   |      | 0.6474     | 1.0800  | 0.6881    | 1.0165   |          |
| EDRN 46   | Sc normal | -1.1541   |      | -1.0427    | -2.8744 | -1.5009   | -2.3195  | -1.1901  |
| EDRN 47   | Sc normal | -0.7660   |      | 0.9950     | 1.3405  | -0.0476   | 0.9420   | 2.1610   |
| EDRN 48   | Sc normal | 0.0411    |      | 1.5018     | 0.9925  | 0.2342    | 0.0853   | 1.2279   |
| EDRN 49   | Early CRC | 0.5501    |      | 1.3412     | 1.6396  | 1.1467    | 0.6185   | 1.5258   |
| EDRN 50   | Early CRC | -0.3787   |      | 0.1161     | -0.1696 | -0.0160   | -2.0653  | 0.0819   |
| EDRN 51   | Early CRC | 0.1592    |      | 1.7041     | 2.6011  | 2.0243    | 1.3110   | 2.1757   |
| EDRN 52   | Early CRC | -0.0645   |      | 0.8029     |         | 0.7914    |          | -0.1123  |
| EDRN 53   | Late CRC  | 0.0709    |      | 1.3872     | 1.7786  | 0.2719    | 0.2465   | 0.1055   |
| EDRN 54   | Late CRC  | 0.3907    |      | 2.3036     | 0.4068  | 1.1295    | -0.0404  | 1.2556   |
| EDRN 55   | Late CRC  | 0.2804    |      | 1.0870     | 1.6568  | 0.3128    | 0.1820   | 1.5839   |
| EDRN 56   | Late CRC  | -0.0945   |      | 3.5454     | 1.5216  | 0.8257    |          | 0.6451   |
| EDRN 57   | A-Adenoma | -0.1524   |      |            | 0.5286  | 1.3453    | 0.4810   | 0.7647   |
| EDRN 58   | A-Adenoma | -0.0427   |      | 1.2632     | 0.9464  | 0.6860    | 0.6859   | 0.4040   |
| EDRN 59   | A-Adenoma | 0.1373    |      | 3.4169     | 0.6038  | 1.6680    | 1.4239   | 3.8509   |
| EDRN 60   | A-Adenoma | 0.3115    |      | 1.7562     | 0.2168  | 0.7515    | 0.2476   | 1.2775   |
| EDRN 61   | Adenomas  | -0.0826   |      | 2.3182     | 0.7562  | 0.7234    | 0.7539   | 1.3752   |
| EDRN 62   | Adenomas  | -0.1232   |      | 1.5085     | 1.1790  | 0.3938    | 0.7161   | 0.5456   |
| EDRN 63   | Adenomas  | -0.1796   |      | 0.6463     | 0.9354  | 0.2732    | 0.1041   | 0.4233   |
| EDRN 64   | Adenomas  | 0.3207    |      | 1.2187     | 1.2966  | 0.4500    | 0.4694   | 1.4043   |
| EDRN 65   | Sv normal | -0.2389   |      | 0.8620     | 0.5351  | 0.8509    | 0.1969   | 0.5209   |
| EDRN 66   | Sv normal | 0.0993    |      | 0.3004     | 1.1980  | 0.0457    | 0.1582   | 0.9841   |
| EDRN 67   | Sv normal | 0.0352    |      | 0.4703     | 0.9965  | 0.0894    | 0.0052   | 0.5423   |

| Sample ID | Status    | EGFR<br>v | EGFR<br>v | ERCC5<br>v | EVI1    | FLT3<br>v | FN1<br>v | FN1<br>v |
|-----------|-----------|-----------|-----------|------------|---------|-----------|----------|----------|
| EDRN 68   | Sv normal | -0.0593   |           | 0.7329     | 1.4940  | 0.0931    | -0.2206  | 0.5274   |
| EDRN 69   | Sc normal | -0.4983   |           | 0.7695     | 1.0105  | -0.4664   | 0.0290   |          |
| EDRN 70   | Sc normal | 0.7350    |           | 2.2117     | 1.6022  | 0.9104    | 0.7735   | 2.6890   |
| EDRN 71   | Sc normal | 0.4292    |           | 0.9395     | 1.1667  | 0.5954    | 1.0392   | 1.2806   |
| EDRN 72   | Sc normal | -0.2356   |           | 1.4449     | 1.4178  | 0.6254    | 0.2681   | 0.6773   |
| EDRN 73   | Early CRC | 0.5963    |           | 3.1920     | 0.9041  | 1.0541    | 1.1572   | 1.2948   |
| EDRN 74   | Early CRC | -0.1110   |           |            | 1.0156  | 0.2844    | 0.8231   | 0.0726   |
| EDRN 75   | Early CRC | 0.5293    |           | 2.1240     | 0.8857  | 0.7574    | 0.7206   | 0.8707   |
| EDRN 76   | Early CRC | 1.0859    |           | 2.8623     | 1.7860  | 0.6671    | 1.3356   | 2.5003   |
| EDRN 77   | Late CRC  | 0.4431    |           | 2.0303     | -1.5075 | 1.5038    | 1.3097   | 1.9780   |
| EDRN 78   | Late CRC  | 0.4358    |           | 2.1751     | 1.6333  | 0.9313    | 0.6556   | 0.9766   |
| EDRN 79   | Late CRC  | 0.5497    |           | 1.6101     | 1.9946  | 1.1546    | 0.5922   | 2.1741   |
| EDRN 80   | Late CRC  | 0.5036    |           | 1.4135     | 1.2767  | 0.9035    | 0.8078   | 0.8897   |
| EDRN 81   | A-Adenoma | 0.9676    |           | 2.5481     | 1.3966  | 1.1946    | 0.5215   | 1.6546   |
| EDRN 82   | A-Adenoma | 0.5381    |           |            | 1.3156  | 0.8742    | 1.1268   | 1.4394   |
| EDRN 83   | A-Adenoma | 0.9005    |           | 0.8494     | 1.6953  | 1.1529    | 0.8213   | 1.9201   |
| EDRN 84   | A-Adenoma | 0.0574    |           | 1.5605     | 0.5406  | 0.6809    | 0.3829   | 0.5020   |
| EDRN 85   | Adenomas  | 0.2103    |           | 0.9294     | 1.4544  | 0.5144    | 0.2504   | 1.4560   |
| EDRN 86   | Adenomas  | 0.4324    |           | 0.2382     | 1.9209  | 1.3783    | 0.3342   | 0.5850   |
| EDRN 87   | Adenomas  | 0.3498    |           | 1.2034     | 0.7315  | 1.0321    | 0.5965   | 1.6629   |
| EDRN 88   | Adenomas  | 0.9567    |           | 1.9557     | 1.5757  | 1.4779    | 0.7850   | 2.5670   |
| EDRN 89   | Sv normal | -0.3294   |           | 0.8851     | -0.9089 | 1.0245    | 0.2841   | -0.2216  |
| EDRN 90   | Sv normal | -0.2593   |           | 1.1771     | 1.9110  | 0.8698    | 0.2158   | -0.3627  |
| EDRN 91   | Sv normal | 0.1005    |           | 1.2341     | 1.5538  | 0.7885    | 1.0180   | 1.0651   |
| EDRN 92   | Sv normal | 0.5110    |           | 0.7169     | 0.7022  | 0.8616    | 0.3311   | 1.7058   |
| EDRN 93   | Sc normal | -0.2268   |           | 1.5216     | 1.2266  | 0.8328    | 0.3109   | 0.9811   |
| EDRN 94   | Sc normal | -0.3643   |           | -0.6701    | 0.9994  | -0.1649   | -0.9065  | 0.7627   |
| EDRN 95   | Sc normal | -0.0078   |           | 0.6941     | 1.2125  | 0.6409    | 0.2086   | 0.6891   |
| EDRN 96   | Sc normal | -6.5001   |           | 0.2554     | 1.1680  | -4.8929   | -5.2996  | -1.8679  |
| EDRN 97   | Early CRC | 0.0704    |           | 1.7510     |         | 1.5569    | 0.7254   | 1.6612   |
| EDRN 98   | Early CRC | 0.7874    |           |            | 0.4485  |           | 1.0266   | 2.7221   |
| EDRN 99   | Early CRC | 0.3402    |           | 0.1903     | 3.1754  | 0.6972    | 0.3199   | 1.1105   |
| EDRN 100  | Early CRC | 0.2781    |           | 1.8107     | 0.9343  | 0.8276    | 1.0998   | 1.6635   |
| EDRN 101  | Late CRC  | -0.0313   |           | 1.5870     | 0.6614  | 0.5834    | 0.6265   | 1.7854   |
| EDRN 102  | Late CRC  | 0.5626    |           | 1.8900     | 1.0575  | 1.4134    | 1.3923   | 1.8301   |
| EDRN 103  | Late CRC  | -0.2825   |           | 0.8940     | -0.6091 | 1.1148    | 0.2491   | 0.1209   |
| EDRN 104  | Late CRC  | 0.5098    |           | -0.2618    | 0.4146  | 0.7412    | 0.7801   | 0.4666   |
| EDRN 105  | A-Adenoma | -0.0709   |           | 2.2449     | 2.0014  | 1.1585    |          | 0.6840   |
| EDRN 106  | A-Adenoma | 0.3565    |           | 2.0036     | 2.4256  | 0.7234    | 1.2536   | 1.5830   |
| EDRN 107  | A-Adenoma | 0.4417    |           | 0.3869     | 1.4221  | 1.1706    |          | 1.4691   |
| EDRN 108  | A-Adenoma | 0.8714    |           | 2.3187     | 1.3826  | 1.3221    | 0.9999   | 1.1286   |
| EDRN 109  | Adenomas  | 0.3013    |           | 1.7929     | 1.5851  | 1.2113    |          | 1.6104   |
| EDRN 110  | Adenomas  | -0.2061   |           | 0.9521     | 0.4173  | 0.4826    | -0.0261  | -0.6922  |
| EDRN 111  | Adenomas  | 0.3212    |           | 4.8145     | 1.8061  | 1.6480    | 0.9081   | 1.6228   |
| EDRN 112  | Adenomas  | -2.3698   |           | -2.2020    | -1.5102 | -4.7160   | -5.0797  | -0.7852  |

| Sample ID | Status    | EGFR<br>v | EGFR<br>v | ERCC5<br>v | EVI1    | FLT3<br>v | FN1<br>v | FN1<br>v |
|-----------|-----------|-----------|-----------|------------|---------|-----------|----------|----------|
| EDRN 113  | Sv normal | 0.0148    |           | 1.5196     | 1.8395  | 0.4650    | 0.1411   | 0.4566   |
| EDRN 114  | Sv normal | 0.1523    |           | 2.0029     | 0.7099  | 0.4377    | 0.7510   | 0.7316   |
| EDRN 115  | Sv normal | 0.0888    |           | 1.1007     | 0.5824  | 1.2198    | 0.3997   | 0.4067   |
| EDRN 116  | Sv normal | -0.7220   |           | 0.7353     | 1.1533  | 0.2573    |          | 0.6577   |
| EDRN 117  | Sc normal | 0.4734    |           | 2.7595     | 1.2071  | 1.3320    | 0.7791   | 1.5487   |
| EDRN 118  | Sc normal | 0.2154    |           | 1.6954     | 1.8848  | 1.0311    | 0.5942   | 1.8421   |
| EDRN 119  | Sc normal | -0.1703   |           | 0.4238     | 1.4847  | -0.0976   | -0.0220  | 1.0728   |
| EDRN 120  | Sc normal | -0.5631   |           | 1.7368     | 0.8440  | 0.1585    | -0.0834  | 0.5987   |
| EDRN 121  | Early CRC | 0.7551    |           | 0.9429     | 1.7605  | 1.4507    | 0.0339   | 2.0483   |
| EDRN 122  | Early CRC | -0.3301   |           | 0.7750     | 0.3528  | 0.0799    | -0.1408  | 0.2959   |
| EDRN 123  | Early CRC | -0.0424   |           | 1.7797     | 1.2926  | 0.3931    | 0.0963   | 2.0672   |
| EDRN 124  | Early CRC | -0.0912   |           | 1.7160     | 2.0590  | -0.2869   | 0.2786   | 1.3462   |
| EDRN 125  | Late CRC  | 0.4250    |           | 2.6821     | 1.2550  | 1.1960    | 0.2845   | 1.4723   |
| EDRN 126  | Late CRC  | -0.0423   |           | 1.5937     | 1.0195  | 0.0816    | -0.2236  | 0.6544   |
| EDRN 127  | Late CRC  | 0.2006    |           | 1.6654     | 1.5925  | 0.4443    | 0.0824   | 0.8164   |
| EDRN 128  | Late CRC  | 0.5511    |           | 2.3457     | 2.1042  | 1.7100    | 0.7108   | 1.7522   |
| EDRN 129  | A-Adenoma | 0.8417    |           | 2.2155     |         | 1.4446    | 1.2907   | 2.3016   |
| EDRN 130  | A-Adenoma | 0.3922    |           | 1.7873     | 0.1583  | 0.1917    | 0.3013   | 1.4984   |
| EDRN 131  | A-Adenoma | 0.7753    |           | 2.4901     | 1.1571  | 1.1468    | 0.8148   | 1.7411   |
| EDRN 132  | A-Adenoma | 0.3523    |           | 2.7020     | 0.9204  | 1.1382    | 0.4154   | 1.8588   |
| EDRN 133  | Adenomas  | -0.2351   |           | 2.8247     | 0.3354  | 0.6786    | 0.8224   | 1.2821   |
| EDRN 134  | Adenomas  | -0.5426   |           | 1.5747     | 2.0262  | 0.3994    | 0.5578   | 0.0351   |
| EDRN 135  | Adenomas  | -0.3013   |           | 2.0423     | 2.0188  | 1.3341    | 1.0518   | 0.8583   |
| EDRN 136  | Adenomas  | 0.3750    |           | -0.4006    | -0.2587 | 1.3103    | 0.5463   | 1.3149   |
| EDRN 137  | Sv normal | -0.8506   |           | 1.6730     | 1.1817  | 0.2494    | 0.2755   | 0.1124   |
| EDRN 138  | Sv normal | -0.2249   |           | 0.1652     | 0.6709  | -0.1305   | 0.0680   | 0.7302   |
| EDRN 139  | Sv normal | 0.1941    |           | 0.9046     | 0.5967  | -0.0641   | 0.3816   | 1.5819   |
| EDRN 140  | Sv normal | -0.2954   |           |            | 1.3222  | 0.5255    | 0.5629   | 0.1925   |
| EDRN 141  | Sc normal | 0.0126    |           | 0.4922     | 0.8476  | 0.1748    | -0.0282  | 0.7025   |
| EDRN 142  | Sc normal | 0.0501    |           | -1.7276    | 0.7789  | 0.2897    | -0.5232  | -1.8976  |
| EDRN 143  | Sc normal | -0.3093   |           | 0.9672     | 1.2422  | 1.5104    | 0.2816   | 0.0943   |
| EDRN 144  | Sc normal | -0.2904   |           | 1.6332     | 0.8847  | 0.2541    | 0.4421   | 2.4358   |
| EDRN 145  | Early CRC | 0.1195    |           | 1.7810     | 1.2418  | 0.9201    | 0.9982   | 1.8060   |
| EDRN 146  | Early CRC | 0.2247    |           | 1.5151     | 1.6351  | 0.1405    | 0.8684   | 1.5127   |
| EDRN 147  | Early CRC | 0.5813    |           | 3.9588     | 1.5436  | 1.6745    | 1.6334   | 3.1293   |
| EDRN 148  | Early CRC | 0.3547    |           | 3.2031     | 2.1184  | 0.7966    | 0.8598   | 0.7835   |
| EDRN 149  | Late CRC  | 0.2942    |           | 1.7123     | 0.3616  | 0.2745    | 0.6350   | 0.2281   |
| EDRN 150  | Late CRC  | 0.6972    |           | 3.0425     | 1.8918  | 1.1052    | 1.0351   | 1.8678   |
| EDRN 151  | Late CRC  | 0.5319    |           | 1.5938     | 2.6859  | 1.3054    | 0.8359   | 1.9041   |
| EDRN 152  | Late CRC  | 0.2002    |           | 2.0736     | 0.9699  | 0.6727    | 1.0337   | 1.3396   |
| EDRN 153  | A-Adenoma | 0.0978    |           | -1.1853    | 1.4593  | -0.5711   | -0.6915  | 0.4886   |
| EDRN 154  | A-Adenoma | -0.0580   |           | 0.6018     | 0.4054  | 0.5378    | 0.4724   | 0.4846   |
| EDRN 155  | A-Adenoma | 0.3051    |           | 1.6705     | 1.3051  | 1.1146    | 0.3230   | 1.4000   |
| EDRN 156  | A-Adenoma |           |           | 1.7966     | 1.7371  | 0.8351    | 0.3155   | 1.9506   |
| EDRN 157  | Adenomas  | 0.1248    |           | 2.2702     | 2.2732  | 0.8559    | 0.9709   | 0.9996   |

| Sample ID | Status    | EGFR<br>v | EGFR<br>v | ERCC5<br>v | EVI1<br>v | FLT3<br>v | FN1<br>v | FN1<br>v |
|-----------|-----------|-----------|-----------|------------|-----------|-----------|----------|----------|
| EDRN 158  | Adenomas  | 0.5028    |           | 3.5220     | 0.8215    | 1.9049    | 1.5972   |          |
| EDRN 159  | Adenomas  | -0.4086   |           | 1.8336     | 0.1474    | 0.2481    | -0.2811  | 0.7082   |
| EDRN 160  | Adenomas  | 0.0485    |           | -0.5137    | -0.2481   | 0.6517    | 0.1331   | -0.8486  |
| EDRN 161  | Sv normal | -0.3956   |           | 0.3643     | 0.5926    | 0.8730    | -0.3659  | 0.4423   |
| EDRN 162  | Sv normal | -0.5372   |           | -0.6750    | 1.6752    | -0.4128   | -0.7322  | 0.3966   |
| EDRN 163  | Sv normal | -0.7252   |           | 0.8615     | -1.9854   | 0.2472    | -0.8690  | -0.5396  |
| EDRN 164  | Sv normal | -0.7852   |           | 0.7671     | 1.3798    | -0.1947   | 0.2973   | 0.5903   |
| EDRN 165  | Sc normal | -0.3949   |           | -0.9216    | 0.6068    | -0.3856   | -0.9511  | 0.1061   |
| EDRN 166  | Sc normal | 0.4203    |           | 1.1974     | 3.1403    | 0.6040    | -0.3812  | 1.7636   |
| EDRN 167  | Sc normal | -0.3806   |           | 1.4427     | 0.3628    | 1.0810    | 0.3608   | 2.0305   |
| EDRN 168  | Sc normal | 0.3517    |           | 1.8743     | 0.3626    | 1.2429    | 0.2852   | 1.5544   |
| EDRN 169  | Early CRC | 0.2179    |           | 4.0582     | 1.2483    | 0.9987    | 1.3997   | 1.5246   |
| EDRN 170  | Early CRC | 0.4998    |           |            | 0.6916    | 0.7724    | 0.0867   | 1.1901   |
| EDRN 171  | Late CRC  |           |           | 1.8765     | 0.7222    | 1.3492    | 0.4813   | 2.5228   |
| EDRN 172  | Late CRC  | 0.9620    |           | 0.7420     | 2.5265    | 0.9126    | 0.7328   | 1.3094   |
| EDRN 173  | A-Adenoma | 0.4101    |           | 0.8077     | 0.9602    | 1.0315    | 0.6819   | 0.9757   |
| EDRN 174  | A-Adenoma | 0.1153    |           | 0.7384     | 2.0843    | -0.2012   | 0.2158   | 0.6162   |
| EDRN 175  | Adenomas  | 0.0788    |           | 0.3863     | 1.2851    | 0.8381    | 0.2786   | -1.6326  |
| EDRN 176  | Adenomas  | 0.4473    |           | 2.8067     | 2.1846    | 1.0647    | 0.5770   | 1.3761   |
| EDRN 177  | Sv normal | 0.2774    |           | 2.6499     | 1.1900    | 1.1967    | 0.6306   | 2.1806   |
| EDRN 178  | Sv normal | -0.4156   |           | 0.4536     | 0.2694    | 0.4414    | 0.1880   | 0.8971   |
| EDRN 179  | Sc normal | -2.4544   |           | -0.6800    | -0.3286   | -1.0704   | -0.9873  | 0.2509   |
| EDRN 180  | Sc normal | 0.3461    |           | 1.4140     | 0.4083    | 0.4272    | -0.0937  | 1.4370   |



| Sample ID         | Status  | GABRP    | GCN1L1  | GPR125   | GRB2    | grn      | GSDMB    | HOXA3  |
|-------------------|---------|----------|---------|----------|---------|----------|----------|--------|
| Confirmed in EDRN |         |          |         |          | v       | v        |          | v      |
| CHS 1             | Control | -4.7136  | 2.4565  | -18.4784 | -0.6872 | -7.8658  | -20.7457 | 7.6334 |
| CHS 2             | Cancer  | -5.0533  | 1.8549  | -18.0546 | -2.3353 | -8.5734  | -20.5470 | 5.5682 |
| CHS 3             | Cancer  | -5.5804  | 3.0212  | -19.3374 | -1.2245 | -8.6192  | -19.1040 | 5.7658 |
| CHS 4             | Control | -5.6230  | 1.4119  | -18.6595 | -3.4338 | -9.7402  | -21.9932 | 4.1548 |
| CHS 5             | Control | -6.1868  | 1.5046  | -20.7725 | -5.6558 | -7.6386  | -19.8950 | 5.8567 |
| CHS 6             | Cancer  | -5.5296  | 3.9183  | -17.6378 | -3.4958 | -9.4006  | -19.4115 | 5.3925 |
| CHS 7             | Control | -7.4842  | 2.2199  | -17.4929 | -4.5004 | -9.7779  | -20.1028 | 4.6005 |
| CHS 8             | Cancer  | -7.4111  | 1.7392  | -17.1773 | -3.9454 | -8.9401  | -19.7936 | 5.2150 |
| CHS 9             | Cancer  | -5.1681  | 2.1172  | -19.5767 | -2.7288 | -8.0493  | -19.4377 | 5.7649 |
| CHS 10            | Control | -5.5842  | 2.2001  | -18.8247 | -3.2590 | -8.6412  | -19.0157 | 5.0387 |
| CHS 11            | Control | -8.2241  | 1.4189  | -19.2634 | -3.8118 | -11.6429 | -20.2637 | 1.1771 |
| CHS 12            | Cancer  | -6.1050  | 3.4321  | -17.5462 | -2.5190 | -9.6865  | -19.9718 | 5.3884 |
| CHS 13            | Cancer  | -6.2553  | 2.4658  | -18.3163 | -3.2439 | -7.4322  | -19.4211 | 7.2437 |
| CHS 14            | Control | -6.3391  | 1.7408  | -18.2731 | -2.0325 | -8.2023  | -20.0126 | 6.5629 |
| CHS 15            | Control | -6.9558  | 1.9349  | -19.1068 | -3.1876 | -8.4183  | -20.1415 | 5.6560 |
| CHS 16            | Cancer  | -6.0446  | 2.8529  | -17.2161 | -2.0035 | -8.3365  | -18.2713 | 5.5631 |
| CHS 17            | Cancer  | -4.9552  | 1.6512  | -19.3638 | -3.6297 | -7.2795  | -18.5350 | 6.6968 |
| CHS 18            | Control | -6.5698  | 2.4207  | -17.9267 | -4.3697 | -7.7089  | -19.4520 | 6.0614 |
| CHS 19            | Cancer  | -5.9846  | 3.3116  | -17.8023 | -3.3167 | -8.2276  | -19.7257 | 6.9184 |
| CHS 20            | Control | -7.8681  | 0.1163  | -18.5817 | -2.4099 | -9.4900  | -20.4845 | 4.6671 |
| CHS 21            | Cancer  | -4.6000  | -0.1548 | -18.2524 | -4.4029 | -7.6832  | -18.8256 | 4.9976 |
| CHS 22            | Control | -6.5594  | 0.6710  | -18.0071 | -4.3685 | -10.1147 | -21.8811 | 4.4231 |
| CHS 23            | Cancer  | -4.5178  | 2.3419  | -18.2182 | -0.8549 | -7.3254  | -19.1076 | 6.3103 |
| CHS 24            | Control | -10.9148 | -1.6376 | -18.6851 | -3.8262 | -12.4008 | -20.3056 | 3.0891 |
| CHS 25            | Cancer  | -6.6481  | 1.9352  | -17.7702 | -2.2231 | -9.1428  | -20.5967 | 5.8569 |
| CHS 26            | Control | -6.4382  | 2.7517  | -17.8147 | -2.6540 | -8.6437  | -21.1299 | 6.1610 |
| CHS 27            | Cancer  | -6.0376  | 1.6756  | -17.8670 | -3.3725 | -9.3266  | -20.2819 | 4.6433 |
| CHS 28            | Control | -5.8934  | 2.9888  | -17.7408 | -2.3361 | -7.6329  | -19.6653 | 7.6107 |
| CHS 29            | Cancer  | -6.8853  | 1.1766  | -17.6732 | -2.3778 | -8.3356  | -20.1714 | 6.3817 |
| CHS 30            | Control | -6.5362  | 0.1684  | -17.7530 | -4.1394 | -8.7969  | -21.6893 | 5.6240 |
| CHS 31            | Control | -5.4058  | 2.6905  | -18.0187 | -1.5989 | -8.5990  | -18.4777 | 6.9664 |
| CHS 32            | Cancer  | -6.4472  | 2.1448  | -18.4417 | -2.8306 | -9.1396  | -19.4360 | 6.0722 |
| CHS 33            | Cancer  | -4.7901  | 1.6086  | -17.8753 | -1.9803 | -8.4991  | -20.0537 | 6.2807 |
| CHS 34            | Control | -6.6767  | 1.1332  | -18.0996 | -2.6723 | -8.9469  | -20.3079 | 5.8718 |
| CHS 35            | Control | -5.3517  | 1.9817  | -18.3510 | -2.2061 | -9.6133  | -20.8182 | 4.2729 |
| CHS 36            | Cancer  | -6.0984  | 2.7518  | -18.0041 | -3.1118 | -8.7440  | -19.1543 | 5.1300 |
| CHS 37            | Cancer  | -5.7762  | 2.3863  | -18.5632 | -2.8297 | -8.6955  | -20.2521 | 5.1798 |
| CHS 38            | Control | -6.4172  | 1.8077  | -18.9580 | -3.6451 | -9.2951  | -20.5690 | 4.7091 |
| CHS 39            | Control | -6.7985  | 1.2974  | -19.1872 | -3.1259 | -8.9627  | -20.4999 | 3.9121 |
| CHS 40            | Cancer  | -6.3054  | 2.9184  | -18.8413 | -2.9191 | -8.6329  | -19.1799 | 4.9796 |
| CHS 41            | Control | -7.3009  | 0.2802  | -19.2255 | -4.0695 | -9.1106  | -19.0961 | 4.7767 |
| CHS 42            | Cancer  | -7.0946  | 2.4712  | -18.3746 | -5.5632 | -9.1477  | -20.0154 | 4.1066 |
| CHS 43            | Control | -6.3513  | 1.2280  | -20.1480 | -4.3453 | -8.8385  | -18.5594 | 5.5856 |
| CHS 44            | Cancer  | -5.9965  | 2.0093  | -19.1097 | -3.2196 | -8.9448  | -20.0035 | 5.1172 |
| CHS 45            | Control | -6.7659  | 1.8893  | -18.6038 | -3.3194 | -8.4412  | -20.3017 | 4.8777 |

| Sample ID         | Status  | GABRP   | GCN1L1  | GPR125   | GRB2    | grn      | GSDMB    | HOXA3  |
|-------------------|---------|---------|---------|----------|---------|----------|----------|--------|
| Confirmed in EDRN |         |         |         |          | v       | v        |          | v      |
| CHS 46            | Cancer  | -4.6822 | 2.5577  | -18.7613 | -3.0137 | -7.4980  | -18.3131 | 5.7030 |
| CHS 47            | Cancer  | -6.4760 | 1.7447  | -17.6472 | -4.4111 | -8.6782  | -18.3880 | 5.0932 |
| CHS 48            | Control | -7.0546 | 1.4121  | -19.7420 | -3.2782 | -9.5297  | -19.4852 | 4.8332 |
| CHS 49            | Cancer  | -6.9238 | 2.0007  | -16.9143 | -2.8758 | -10.0730 | -20.2384 | 5.5727 |
| CHS 50            | Control | -5.7649 | 1.5826  | -17.6830 | -2.3525 | -9.1389  | -19.4614 | 5.3713 |
| CHS 51            | Cancer  | -6.7286 | 2.7595  | -18.2544 | -2.5458 | -9.4951  | -18.7432 | 4.8856 |
| CHS 52            | Control | -6.0913 | 1.4189  | -19.2863 | -3.2725 | -9.0113  | -20.8424 | 5.3572 |
| CHS 53            | Control | -6.2055 | 0.4740  | -17.8834 | -3.1410 | -8.4556  | -20.3496 | 5.8121 |
| CHS 54            | Cancer  | -6.2754 | 3.2233  | -17.2884 | -2.1113 | -9.4069  | -18.5665 | 5.0225 |
| CHS 55            | Cancer  | -7.1092 | 1.6540  | -17.6818 | -2.5769 | -9.3374  | -20.0820 | 4.4263 |
| CHS 56            | Control | -6.7594 | 0.6779  | -18.7857 | -3.7261 | -8.8352  | -20.8763 | 4.4936 |
| CHS 57            | Control | -6.4055 | 0.9989  | -19.2088 | -3.5201 | -9.1185  | -19.7065 | 6.3452 |
| CHS 58            | Cancer  | -6.8774 | 1.8518  | -18.7894 | -3.2644 | -8.9344  | -19.0958 | 5.4584 |
| CHS 59            | Cancer  | -6.8170 | 0.2958  | -19.3933 | -3.9193 | -8.9576  | -19.8124 | 5.2016 |
| CHS 60            | Control | -6.3945 | 0.8584  | -18.9287 | -2.5392 | -8.7429  | -19.5846 | 5.6457 |
| CHS 61            | Cancer  | -7.0436 | 3.8091  | -18.8714 | -3.5242 | -9.4841  | -18.4355 | 5.3205 |
| CHS 62            | Control | -6.3529 | -0.2833 | -20.2965 | -4.8782 | -9.8483  | -21.3520 | 4.0167 |
| CHS 63            | Cancer  | -4.8602 | 3.3609  | -18.0240 | -2.5836 | -7.7143  | -17.9748 | 5.5905 |
| CHS 64            | Control | -7.2578 | 1.0952  | -19.2168 | -4.6650 | -9.5123  | -21.1796 | 4.4349 |
| CHS 65            | Cancer  | -5.1504 | 3.7791  | -18.3742 | -2.2238 | -6.9276  | -19.4017 | 6.6985 |
| CHS 66            | Control | -5.0443 | 2.6372  | -17.8460 | -3.1536 | -7.2797  | -19.8393 | 6.9916 |
| CHS 67            | Control | -6.0155 | 0.5074  | -20.5480 | -5.6004 | -8.3081  | -20.8632 | 4.6170 |
| CHS 68            | Cancer  | -5.6602 | 2.4508  | -19.1224 | -2.6785 | -8.9769  | -21.3845 | 5.2802 |
| CHS 69            | Cancer  | -5.3240 | 3.3085  | -18.2705 | -1.7952 | -8.6095  | -20.0355 | 6.1373 |
| CHS 70            | Control | -6.3679 | 1.6550  | -18.4333 | -2.1381 | -8.3505  | -20.4711 | 6.7841 |
| CHS 71            | Cancer  | -6.1228 | 1.9547  | -18.4357 | -2.7985 | -8.1493  | -18.4226 | 5.9368 |
| CHS 72            | Control | -6.6759 | 2.9389  | -15.0344 | -3.3590 | -8.5274  | -19.7266 | 4.3447 |
| CHS 73            | Control | -8.0781 | 1.6713  | -18.5858 | -3.6621 | -11.3664 | -21.2200 | 3.9614 |
| CHS 74            | Cancer  | -4.7921 | 2.1245  | -17.3015 | -3.1289 | -7.1534  | -18.6724 | 6.2008 |
| CHS 75            | Cancer  | -5.0853 | 2.3245  | -17.6428 | -0.7967 | -8.0362  | -21.1410 | 5.8561 |
| CHS 76            | Control | -6.5988 | 1.1585  | -18.8913 | -4.6229 | -9.4817  | -21.3933 | 4.4061 |
| CHS 77            | Control | -7.0779 | 2.0361  | -18.9496 | -4.1549 | -9.2000  | -22.0001 | 4.9884 |
| CHS 78            | Cancer  | -4.9159 | 1.8447  | -18.4224 | -2.1943 | -7.8788  | -20.4488 | 6.3491 |
| CHS 79            | Cancer  | -4.6585 | 3.5861  | -18.5961 | -2.6102 | -7.3972  | -19.4933 | 6.3553 |
| CHS 80            | Control | -5.7605 | 2.7779  | -17.8079 | -2.1701 | -8.8101  | -18.9553 | 5.8603 |
| CHS 81            | Control | -5.7645 | 2.8957  | -18.6377 | -2.2468 | -9.0142  | -19.7849 | 5.3844 |
| CHS 82            | Cancer  | -6.9062 | 3.1743  | -18.1003 | -2.9368 | -8.2571  | -20.9240 | 5.4201 |
| CHS 83            | Cancer  | -5.3435 | 2.8686  | -16.8158 | -1.6141 | -7.2950  | -19.0367 | 5.6870 |
| CHS 84            | Control | -6.2451 | 3.1115  | -17.3444 | -2.2258 | -8.7247  | -19.8947 | 5.2190 |
| CHS 85            | Cancer  | -6.4790 | 0.8855  | -18.8417 | -3.5590 | -8.9529  | -18.9184 | 4.9063 |
| CHS 86            | Control | -7.3057 | 0.6541  | -18.6428 | -4.0397 | -9.6399  | -20.3442 | 4.7047 |
| CHS 87            | Control | -6.8959 | 0.3844  | -19.2300 | -4.0158 | -9.7810  | -20.3400 | 6.0569 |
| CHS 88            | Cancer  | -6.6232 | 2.5107  | -18.7083 | -4.0858 | -8.9487  | -19.1198 | 5.0099 |
| CHS 89            | Control | -6.0878 | 0.7506  | -19.4678 | -2.4548 | -8.5737  | -18.7285 | 5.6290 |
| CHS 90            | Cancer  | -6.1093 | 0.9950  | -19.2639 | -3.1082 | -8.6542  | -18.4092 | 5.3859 |

| Sample ID         | Status  | GABRP   | GCN1L1  | GPR125   | GRB2    | grn      | GSDMB    | HOXA3  |
|-------------------|---------|---------|---------|----------|---------|----------|----------|--------|
| Confirmed in EDRN |         |         |         |          | v       | v        |          | v      |
| CHS 91            | Cancer  | -6.4931 | 1.3932  | -18.6224 | -3.3420 | -9.5009  | -19.4512 | 5.1155 |
| CHS 92            | Control | -6.4786 | 1.1028  | -18.4607 | -3.3156 | -9.1687  | -19.4897 | 5.3513 |
| CHS 93            | Control | -7.1444 | 2.3307  | -19.5121 | -5.2365 | -9.1068  | -19.7790 | 4.9162 |
| CHS 94            | Cancer  | -5.8523 | 2.1583  | -17.4546 | -3.0981 | -8.5544  | -19.4657 | 5.4107 |
| CHS 95            | Control | -6.3714 | 1.3019  | -18.5565 | -2.8949 | -8.8366  | -19.6584 | 6.3368 |
| CHS 96            | Cancer  | -7.1607 | 0.9685  | -18.7145 | -3.7289 | -8.8622  | -19.7769 | 5.2345 |
| CHS 97            | Cancer  | -6.2318 | 1.6049  | -18.6770 | -3.3024 | -8.7050  | -19.6632 | 6.0406 |
| CHS 98            | Control | -7.3811 | -1.0236 | -19.9372 | -4.7020 | -10.8581 | -19.8361 | 4.8765 |
| CHS 99            | Cancer  | -6.6929 | 1.8473  | -18.7118 | -3.9311 | -8.3508  | -19.2361 | 5.4141 |
| CHS 100           | Control | -5.6624 | 2.5992  | -19.0961 | -2.6576 | -8.8915  | -19.8333 | 5.3146 |
| CHS 101           | Cancer  | -5.7979 | 1.5899  | -18.3299 | -3.2961 | -7.6132  | -20.2318 | 5.7649 |
| CHS 102           | Control | -4.5976 | 1.6000  | -18.4120 | -2.7962 | -6.9034  | -18.0332 | 6.3563 |
| CHS 103           | Cancer  | -5.4807 | 1.5201  | -18.1114 | -1.2089 | -8.0966  | -19.9348 | 6.0241 |
| CHS 104           | Control | -8.0741 | 3.1533  | -18.4676 | -4.2514 | -9.5187  | -20.8486 | 5.3774 |
| CHS 105           | Cancer  | -5.4089 | 1.6357  | -18.3190 | -1.8553 | -7.9175  | -19.4705 | 5.9415 |
| CHS 106           | Control | -7.9757 | 2.8706  | -19.0287 | -3.4019 | -9.7745  | -20.5256 | 4.3944 |
| CHS 107           | Cancer  | -6.4466 | -0.0605 | -18.8388 | -3.5862 | -8.9109  | -19.1304 | 4.9663 |
| CHS 108           | Control | -6.2019 | 2.9183  | -19.6337 | -2.0464 | -8.6789  | -20.0400 | 6.1320 |
| CHS 109           | Control | -6.3605 | 2.4795  | -17.0331 | -4.0063 | -8.9785  | -20.6118 | 4.9974 |
| CHS 110           | Cancer  | -6.9584 | 1.7832  | -18.6855 | -3.7238 | -9.3871  | -21.1225 | 5.3723 |
| CHS 111           | Control | -6.8933 | 1.7914  | -19.1156 | -4.5139 | -8.8232  | -20.1365 | 5.0203 |
| CHS 112           | Cancer  | -6.1199 | 3.8818  | -17.0246 | -2.1915 | -9.6967  | -18.7989 | 5.2066 |
| CHS 113           | Control | -5.0677 | 1.8078  | -18.4671 | -2.5092 | -7.1190  | -18.7494 | 6.4883 |
| CHS 114           | Cancer  | -5.3464 | 2.1230  | -17.6395 | -3.0145 | -9.0717  | -21.2516 | 4.7546 |
| CHS 117           | Control | -5.9759 | 1.5989  | -17.2239 | -3.7760 | -9.1170  | -20.7512 | 4.7179 |
| CHS 118           | Cancer  | -6.3062 | 2.5277  | -17.9640 | -2.9869 | -9.0483  | -19.5154 | 5.4561 |
| CHS 119           | Cancer  | -6.3718 | 1.7642  | -18.3976 | -2.7728 | -8.6377  | -19.5953 | 5.4363 |
| CHS 120           | Control | -6.3573 | 1.2460  | -18.5757 | -2.4423 | -9.4969  | -19.4254 | 4.8807 |
| CHS 121           | Control | -6.3636 | 1.5672  | -18.4266 | -4.5949 | -9.7908  | -20.9150 | 5.1582 |
| CHS 122           | Cancer  | -7.0055 | 2.2485  | -17.9368 | -3.3310 | -8.3021  | -19.9205 | 5.6391 |
| CHS 123           | Cancer  | -5.4833 | 1.6123  | -18.2953 | -2.6780 | -8.7796  | -20.0122 | 5.8154 |
| CHS 124           | Control | -5.8495 | 2.9793  | -17.9407 | -2.5822 | -7.9913  | -21.0712 | 5.7828 |
| CHS 125           | Cancer  | -6.2068 | 1.5753  | -18.7818 | -2.5788 | -7.9576  | -20.4000 | 6.1675 |
| CHS 126           | Control | -5.7245 | 2.3662  | -18.5138 | -3.2397 | -8.5977  | -20.1793 | 6.0293 |
| CHS 127           | Cancer  | -3.5346 | 4.7698  | -14.4862 | 2.1973  | -8.5358  | -19.1166 | 6.1822 |
| CHS 128           | Control | -7.7757 | 0.3230  | -20.1179 | -3.3901 | -9.6945  | -19.0987 | 4.8235 |
| CHS 129           | Control | -8.5427 | 0.6593  | -18.5342 | -4.3816 | -9.6701  | -19.9492 | 4.5858 |
| CHS 130           | Cancer  | -7.9238 | 1.8628  | -19.7100 | -5.0168 | -10.3138 | -20.5153 | 4.0122 |
| CHS 131           | Cancer  | -5.8868 | 1.8430  | -19.2486 | -2.7742 | -8.3316  | -19.2170 | 5.2374 |
| CHS 132           | Control | -6.0142 | 3.1734  | -18.9246 | -3.3070 | -7.7416  | -19.8306 | 5.5980 |
| CHS 133           | Cancer  | -8.4507 | 0.4094  | -20.6660 | -4.3466 | -10.6403 | -21.2832 | 3.6903 |
| CHS 134           | Control | -7.3689 | 2.1063  | -19.0629 | -3.4065 | -9.0416  | -19.7796 | 5.4622 |
| CHS 135           | Cancer  | -5.9022 | 1.8134  | -18.2948 | -3.6885 | -8.5996  | -20.3754 | 5.7957 |
| CHS 136           | Control | -5.4994 | 1.6495  | -17.8976 | -2.5648 | -7.6921  | -18.8423 | 5.4648 |
| CHS 137           | Cancer  | -7.0492 | 1.5423  | -17.9642 | -3.7438 | -9.1627  | -20.2568 | 6.2159 |

| Sample ID Status  | GABRP   | GCN1L1  | GPR125   | GRB2    | grn     | GSDMB    | HOXA3   |
|-------------------|---------|---------|----------|---------|---------|----------|---------|
| Confirmed in EDRN |         |         |          | v       | v       |          | v       |
| CHS 138 Control   | -6.0072 | 1.4845  | -18.7751 | -3.4142 | -9.1289 | -20.2017 | 5.2430  |
| CHS 139 Cancer    | -4.9573 | 2.1646  | -18.1034 | -2.1619 | -7.9416 | -18.3970 | 5.5093  |
| CHS 140 Control   | -4.8208 | 1.7598  | -18.5727 | -3.3440 | -7.5077 | -19.3003 | 5.7762  |
| CHS 141 Cancer    | -5.5287 | 3.1017  | -18.3087 | -3.1568 | -8.7223 | -19.3800 | 5.6168  |
| CHS 142 Control   | -6.5995 | 1.2322  | -18.2729 | -4.0147 | -9.8245 | -18.9776 | 4.9721  |
| CHS 143 Cancer    | -6.0198 | 1.8658  | -18.6729 | -3.0592 | -8.9233 | -19.7505 | 5.1847  |
| CHS 144 Control   | -5.7134 | 0.8996  | -17.0631 | -2.6651 | -8.3038 | -19.6755 | 5.7832  |
| CHS 145 Cancer    | -7.6020 | 1.8799  | -17.7334 | -3.6210 | -9.3458 | -20.7743 | 4.7211  |
| CHS 146 Control   | -7.2744 | 2.4677  | -18.0067 | -3.2935 | -9.1523 | -20.7486 | 4.6304  |
| CHS 147 Cancer    | -5.1901 | 1.9862  | -17.8053 | -3.7064 | -8.2152 | -19.7961 | 6.0874  |
| CHS 148 Control   | -5.1607 | 1.7127  | -18.5458 | -2.4055 | -8.1114 | -18.0739 | 6.4912  |
| CHS 149 Control   | -6.3379 | 1.6220  | -19.5673 | -3.4017 | -8.2945 | -19.5759 | 6.0300  |
| CHS 150 Cancer    | -5.5034 | 2.4994  | -18.6394 | -2.9418 | -8.4627 | -18.3211 | 5.3111  |
| CHS 151 Control   | -6.3332 | 1.8849  | -18.3683 | -3.1920 | -8.7371 | -20.4824 | 5.5529  |
| CHS 152 Cancer    | -5.2676 | 2.8697  | -18.0580 | -2.4298 | -8.3741 | -20.1001 | 5.4523  |
| CHS 153 Control   | -6.5498 | 0.8949  | -18.5869 | -4.1326 | -9.2774 | -18.8131 | 4.4932  |
| CHS 154 Cancer    | -5.7815 | 2.6230  | -18.3352 | -3.7884 | -8.7976 | -19.1010 | 5.6125  |
| CHS 155 Cancer    | -5.9486 | 2.3441  | -18.0874 | -2.7839 | -8.4894 | -19.8312 | 6.3138  |
| CHS 156 Control   | -6.1621 | 1.4009  | -18.3966 | -4.1899 | -8.9688 | -20.8790 | 4.9791  |
| CHS 157 Cancer    | -7.4247 | 1.0718  | -19.2642 | -2.5635 | -9.5711 | -20.5971 | 4.6241  |
| CHS 158 Control   | -5.6897 | 2.0929  | -18.7872 | -2.0586 | -8.7590 | -19.7502 | 5.3914  |
| CHS 159 Cancer    | -6.7058 | 1.4645  | -17.8167 | -2.5331 | -9.0372 | -20.2624 | 5.3509  |
| CHS 160 Control   | -7.2205 | 1.1915  | -19.0487 | -3.1203 | -9.2029 | -20.5239 | 5.4556  |
| EDRN 1 Early CRC  |         | 0.1388  |          | 0.4892  | 0.6843  | 0.8079   | 1.1590  |
| EDRN 2 Early CRC  |         | -1.3549 | -3.1821  | -2.5229 | -1.2044 | -4.3398  | -0.3032 |
| EDRN 3 Early CRC  |         | 0.6187  | -1.6434  | 0.5908  | 0.6419  | 1.6239   | 1.0058  |
| EDRN 4 Early CRC  |         | 0.4024  | -1.4274  | 0.0226  | 1.5022  | 1.7901   | 0.5962  |
| EDRN 5 Late CRC   |         | 1.4249  | -0.8529  | 1.3705  | 1.2259  | 0.8282   | 0.8995  |
| EDRN 6 Late CRC   |         | 1.1755  | 0.0510   | 0.3149  | 0.6167  | -0.2869  |         |
| EDRN 7 Late CRC   |         | 3.0751  | -0.1664  | 0.7114  | 1.0184  | -0.1233  | 1.4084  |
| EDRN 8 Late CRC   |         | 1.0063  | -1.2277  | 0.5972  | 0.6006  | 0.9956   | 1.1817  |
| EDRN 9 A-Adenoma  |         | -1.2236 | -0.4546  | -0.3891 | -0.0647 | 0.1411   | 0.0495  |
| EDRN 10 A-Adenoma |         |         | 0.3113   | 0.4881  | 0.7883  | -0.6729  |         |
| EDRN 11 A-Adenoma |         | 0.7384  | -1.0535  | 0.6826  | 1.6419  | 1.0476   | 0.9452  |
| EDRN 12 A-Adenoma |         | 0.1680  | -0.5516  | 0.0131  | 1.4695  | 0.0474   | -0.0429 |
| EDRN 13 Adenomas  |         |         |          | 0.8283  | 0.4420  | -0.1893  | 0.4944  |
| EDRN 14 Adenomas  |         |         | 0.0919   | 0.7209  | 1.3424  | 0.0495   | 1.9425  |
| EDRN 15 Adenomas  |         |         | 0.6909   | 0.8404  | -0.0387 |          |         |
| EDRN 16 Adenomas  |         |         | 0.9321   | 1.0833  | 0.3916  | -0.9082  | 1.6177  |
| EDRN 17 Sv normal |         |         | 0.0428   | -0.1190 | -0.4284 | -0.3251  | 0.8282  |
| EDRN 18 Sv normal |         | 1.2445  | 0.4474   |         | -0.1293 | -1.0128  | 1.2428  |
| EDRN 19 Sv normal |         | 0.5083  | 0.3785   | -0.0671 | 0.4787  | -0.4966  | -0.0083 |
| EDRN 20 Sv normal |         | 0.5156  | 1.0477   |         |         | 0.4487   | -0.6734 |
| EDRN 21 Sc normal |         | 0.8264  | 1.1579   | 0.7877  | 0.8482  | 0.0984   | -0.8961 |
| EDRN 22 Sc normal |         | 0.6349  | 1.0767   | 0.1029  | 0.6051  | -0.7421  | -0.3970 |

| Sample ID         | Status    | GABRP | GCN1L1  | GPR125  | GRB2    | grn     | GSDMB   | HOXA3   |
|-------------------|-----------|-------|---------|---------|---------|---------|---------|---------|
| Confirmed in EDRN |           |       |         |         | v       | v       |         | v       |
| EDRN 23           | Sc normal |       | 0.1854  | 0.7546  | 0.2092  | 0.1805  | -0.2669 | -0.2798 |
| EDRN 24           | Sc normal |       | 1.1802  | -0.5756 | 0.3600  | 0.7479  | -0.0336 | -0.5015 |
| EDRN 25           | Early CRC |       |         | 0.4384  | 0.1294  | -0.0669 | -1.0706 | 0.7728  |
| EDRN 26           | Early CRC |       |         | -0.1344 | 0.0554  | 0.5302  | 0.0080  | 0.2861  |
| EDRN 27           | Early CRC |       |         | 0.1874  | 0.0118  | -0.0552 | -1.7992 | 0.0215  |
| EDRN 28           | Early CRC |       |         | 0.4520  | 0.7101  | 1.0309  | -0.1165 | 1.1680  |
| EDRN 29           | Late CRC  |       |         | -0.1523 | 0.3367  | 0.2971  | 1.5473  | 0.2556  |
| EDRN 30           | Late CRC  |       | 1.6288  | 0.2658  | 0.5160  | -0.0126 | -1.4917 | 1.3154  |
| EDRN 31           | Late CRC  |       |         | -0.3100 | 0.3583  | 0.4994  | -0.0403 | 0.5370  |
| EDRN 32           | Late CRC  |       | 0.3670  | -0.4964 | 0.1892  |         | 0.5969  | 0.4334  |
| EDRN 33           | A-Adenoma |       | 1.1023  | -0.2709 |         |         | 0.6668  | 0.5216  |
| EDRN 34           | A-Adenoma |       | 1.9117  | 0.4014  | -0.3793 | 1.1961  | 0.4191  | 0.5477  |
| EDRN 35           | A-Adenoma |       | 1.5604  | 0.0574  |         | 0.8565  | 0.7817  | 0.2398  |
| EDRN 36           | A-Adenoma |       | 1.8405  | 0.7912  | 0.9758  | 1.4402  | -1.6083 | 1.0390  |
| EDRN 37           | Adenomas  |       | 0.7673  | -0.1507 | -0.1517 |         | -1.1816 | 0.9808  |
| EDRN 38           | Adenomas  |       |         |         | 1.2966  | 1.1275  | 1.7542  | 2.0091  |
| EDRN 39           | Adenomas  |       | 0.0769  | -0.7181 | 2.0458  | 1.2893  | 1.1724  | 0.7926  |
| EDRN 40           | Adenomas  |       | -0.9233 | -2.0325 | -0.7523 | -0.8338 | -0.1633 | -2.6207 |
| EDRN 41           | Sv normal |       |         | -0.3866 | 1.0317  | 1.9352  | 1.4351  | 0.3316  |
| EDRN 42           | Sv normal |       | 0.6162  | -1.5689 | -0.0124 | 0.3137  | 0.2648  | 1.6478  |
| EDRN 43           | Sv normal |       |         | -0.2789 | -0.2198 | 0.3282  | -1.3957 | -0.4944 |
| EDRN 44           | Sv normal |       |         | 0.0161  | -0.1887 | 0.5229  | -0.6441 | -0.2537 |
| EDRN 45           | Sc normal |       |         | -0.0152 | 0.4157  | 0.8148  | 0.1487  | 0.7488  |
| EDRN 46           | Sc normal |       |         | -0.9137 | -0.1150 | -0.5938 | -0.1248 |         |
| EDRN 47           | Sc normal |       |         | -0.2036 | -0.1332 | 0.4448  | -0.2778 | 1.4852  |
| EDRN 48           | Sc normal |       | -1.3548 | 0.5625  | 0.1426  | 0.4173  | -0.4027 | 0.2645  |
| EDRN 49           | Early CRC |       | 1.5367  | -0.7550 |         |         | -0.1559 | 0.9635  |
| EDRN 50           | Early CRC |       | 0.6378  | -0.5668 | -1.0767 | -0.6252 | -1.9143 | -0.3551 |
| EDRN 51           | Early CRC |       | -0.1107 | -0.8493 |         |         | -0.1403 |         |
| EDRN 52           | Early CRC |       | 0.4008  | -0.4072 | 0.6305  | 1.0945  | -0.0446 | 0.0877  |
| EDRN 53           | Late CRC  |       |         | -0.1579 | 0.6467  | 1.1119  | 1.4354  | 0.1606  |
| EDRN 54           | Late CRC  |       |         | -0.9180 | 0.4779  | 0.7873  |         | 0.7724  |
| EDRN 55           | Late CRC  |       |         | 0.0701  | 0.2055  | 0.9204  | 0.7967  | 0.5269  |
| EDRN 56           | Late CRC  |       |         | -0.3434 | 0.0573  | 0.8258  | -0.0919 | 0.3940  |
| EDRN 57           | A-Adenoma |       |         | -0.2357 | -0.2769 | 0.3951  | -0.1671 | 1.4149  |
| EDRN 58           | A-Adenoma |       |         | -0.1016 | 0.3835  | 0.8188  | -0.8615 | 0.3862  |
| EDRN 59           | A-Adenoma |       | 0.0782  | -1.1699 | 0.2199  | -0.0663 | 2.6866  | 1.3874  |
| EDRN 60           | A-Adenoma |       |         | -0.4734 | 0.9765  | 0.2457  | -0.1340 | 0.6922  |
| EDRN 61           | Adenomas  |       |         | 0.5874  | 0.6605  | -0.3209 | -0.1673 | 1.3021  |
| EDRN 62           | Adenomas  |       |         | 0.8176  | 0.4789  | 0.3650  | -1.2307 | 0.5734  |
| EDRN 63           | Adenomas  |       |         | 1.2018  | 0.7768  | 0.6727  | -1.1797 | 0.5325  |
| EDRN 64           | Adenomas  |       |         | 0.5674  | 0.6106  | 0.7368  | -0.4215 | 0.5207  |
| EDRN 65           | Sv normal |       |         | -1.3694 | 0.2438  | 0.3605  | 0.7195  | 0.7939  |
| EDRN 66           | Sv normal |       |         | -0.1471 | 0.0074  | 0.5416  | -0.0087 | -0.0262 |
| EDRN 67           | Sv normal |       |         | -0.3795 | 0.0633  | 0.6363  | -0.6920 | 0.2686  |

| Sample ID         | Status    | GABRP | GCN1L1  | GPR125  | GRB2    | grn     | GSDMB   | HOXA3   |
|-------------------|-----------|-------|---------|---------|---------|---------|---------|---------|
| Confirmed in EDRN |           |       |         |         | v       | v       |         | v       |
| EDRN 68           | Sv normal |       |         | -0.1804 | 0.2051  | 1.0005  | 0.4003  | 0.0704  |
| EDRN 69           | Sc normal |       |         | 0.7104  | -0.0453 | 0.5798  | 0.0740  | 0.2069  |
| EDRN 70           | Sc normal |       |         | -0.5372 | 0.1521  | 0.6930  | 0.5807  | 0.8572  |
| EDRN 71           | Sc normal |       | 1.1299  | -0.0042 | 0.9576  | 1.0027  | -0.5951 | -0.1592 |
| EDRN 72           | Sc normal |       | 0.9329  | -0.1262 | -0.0925 | 0.4224  | -0.4073 |         |
| EDRN 73           | Early CRC |       | 0.9879  | -0.6158 | 1.4098  | 0.6804  | 1.0414  | 1.6420  |
| EDRN 74           | Early CRC |       | 0.7671  | -0.2968 | 0.1363  | 0.9381  | -0.4056 | 1.0286  |
| EDRN 75           | Early CRC |       | 0.6415  | -0.6139 | 0.0446  | 1.0494  | 1.2510  | 0.4588  |
| EDRN 76           | Early CRC |       | 1.9010  | -0.4606 | 0.8005  | 0.9341  | 1.9371  | 2.8056  |
| EDRN 77           | Late CRC  |       | -0.2454 | -0.5517 | 0.7281  | 0.4994  |         | 2.4878  |
| EDRN 78           | Late CRC  |       | 0.6917  | -0.0364 | 0.4281  | 1.1765  | -0.2489 | 0.0961  |
| EDRN 79           | Late CRC  |       | 1.2665  | -0.0030 | -0.2983 | 1.1861  | 0.7045  | 0.1341  |
| EDRN 80           | Late CRC  |       | 0.9306  | -0.1804 | -1.3437 | 1.2532  | 2.0949  | -0.5526 |
| EDRN 81           | A-Adenoma |       | 1.5043  | -1.0475 | 1.3803  | 1.8068  | -0.4717 | 2.0718  |
| EDRN 82           | A-Adenoma |       | 0.7498  | -0.5821 | 1.6996  |         | 1.6506  |         |
| EDRN 83           | A-Adenoma |       | 1.1921  | -1.1251 | 0.6630  | 2.1295  | 1.3154  | 0.6031  |
| EDRN 84           | A-Adenoma |       | 0.5969  | 1.1560  | 0.1077  | 0.9577  | -1.2839 | -0.7808 |
| EDRN 85           | Adenomas  |       |         | 0.0349  | 0.1126  | 1.1063  | -0.3349 | 0.2826  |
| EDRN 86           | Adenomas  |       |         | 0.0456  | 0.5844  | 1.1346  | 0.0440  | -0.2141 |
| EDRN 87           | Adenomas  |       | 0.8774  | 0.4832  | 0.9860  | 0.5947  | -0.6779 | 0.2956  |
| EDRN 88           | Adenomas  |       | 0.5428  | -0.9135 | 1.4713  | 2.1538  | -0.2498 | 2.2404  |
| EDRN 89           | Sv normal |       | -0.6743 | -0.8088 | 0.0383  | -0.8801 | -1.5335 | 0.4518  |
| EDRN 90           | Sv normal |       | 0.9938  | 0.2964  |         | 0.1005  | -0.9289 | 0.9777  |
| EDRN 91           | Sv normal |       | 0.7573  | 0.5337  | -0.2280 | -0.3983 | 0.2887  | 0.5041  |
| EDRN 92           | Sv normal |       | -0.6309 | -1.0627 | 1.7371  | 0.9289  | -0.2684 | 0.2071  |
| EDRN 93           | Sc normal |       | 0.7871  | 0.1639  | -0.8686 | -0.3376 | -0.9284 | -0.1056 |
| EDRN 94           | Sc normal |       | 0.2797  | -0.2756 | 0.2373  | 0.6238  | -0.8097 | -1.5849 |
| EDRN 95           | Sc normal |       | 0.9245  | 0.9018  | 0.2231  | -0.2774 | -2.0354 | -0.0318 |
| EDRN 96           | Sc normal |       | -0.9003 | 0.1908  | -2.9209 | -4.4456 | -1.6695 | -1.4322 |
| EDRN 97           | Early CRC |       |         | -0.1880 | 0.5500  | 1.2090  | 0.5860  |         |
| EDRN 98           | Early CRC |       | 0.7188  | -1.3484 | 1.4016  | 1.6310  | 0.6461  |         |
| EDRN 99           | Early CRC |       | -1.1932 | -1.7787 | -1.0413 | 1.2640  | 2.6682  | -0.0310 |
| EDRN 100          | Early CRC |       | 1.1610  | -0.6965 | 0.1027  | 0.7204  | -0.2883 |         |
| EDRN 101          | Late CRC  |       | 1.4141  | -0.0831 | 0.1705  | 0.6066  | -0.4422 | 1.6157  |
| EDRN 102          | Late CRC  |       | 1.6298  |         | 0.6173  | 0.4607  | 0.2117  | 1.3537  |
| EDRN 103          | Late CRC  |       | -0.4775 | -0.4341 | 0.4593  | -0.3172 | -2.0685 |         |
| EDRN 104          | Late CRC  |       | 0.7971  | -0.4758 | 0.2398  | 0.4415  | -0.4742 |         |
| EDRN 105          | A-Adenoma |       |         | -0.0351 | 1.7285  | 0.8849  | -0.5945 | 1.0561  |
| EDRN 106          | A-Adenoma |       | 1.0914  | -0.4486 | 0.4820  | 0.9275  | 0.7056  | 0.5325  |
| EDRN 107          | A-Adenoma |       | 1.5620  | -0.2649 | 0.0659  | 0.5301  | -0.2578 | 0.1842  |
| EDRN 108          | A-Adenoma |       | 1.6667  |         | 0.8309  |         | -0.1013 |         |
| EDRN 109          | Adenomas  |       | 1.1446  |         | 1.5664  | 0.9828  | -0.2051 | 1.1825  |
| EDRN 110          | Adenomas  |       | -0.0566 | -0.0200 | 0.5876  |         | -1.1807 | -0.4915 |
| EDRN 111          | Adenomas  |       | 0.8723  | 0.3700  | 2.0826  | 1.3029  | 0.7794  | 2.2035  |
| EDRN 112          | Adenomas  |       | -1.4448 | -0.8136 | -5.4867 | -1.4264 | -1.3312 | -4.2114 |

| Sample ID Status   | GABRP | GCN1L1  | GPR125  | GRB2    | grn     | GSDMB   | HOXA3   |
|--------------------|-------|---------|---------|---------|---------|---------|---------|
| Confirmed in EDRN  |       |         |         | v       | v       |         | v       |
| EDRN 113 Sv normal |       | 0.8325  | 0.1077  | 0.9779  | 0.2614  | 0.2826  | 3.0646  |
| EDRN 114 Sv normal |       | 0.5936  | 0.1128  |         | 0.0615  | -1.0472 | 0.1478  |
| EDRN 115 Sv normal |       |         | 0.0412  | 0.3175  | 0.6588  | 0.3588  | 0.1665  |
| EDRN 116 Sv normal |       |         | 0.6268  | 0.4916  | 0.1428  | 0.1071  |         |
| EDRN 117 Sc normal |       |         | -0.3005 | 0.6606  | 0.6213  | 0.4818  | 0.5799  |
| EDRN 118 Sc normal |       |         | 0.3210  | 0.7671  | 0.7934  | 0.2341  | 0.9315  |
| EDRN 119 Sc normal |       |         | 0.5350  |         |         | -0.5650 | -0.4187 |
| EDRN 120 Sc normal |       | 1.4512  | 0.9283  | -0.4570 | 0.1707  | -0.0269 |         |
| EDRN 121 Early CRC |       |         | 0.9102  | 1.3526  | 0.7776  | -0.8350 | 0.6557  |
| EDRN 122 Early CRC |       |         | -0.0866 | -0.4131 | 0.4518  | -0.3456 | -0.7846 |
| EDRN 123 Early CRC |       |         | 0.1657  | -0.0135 | 0.5145  | -0.0496 | 0.1571  |
| EDRN 124 Early CRC |       |         | 1.3161  | 0.3218  | 0.2560  | -0.6076 | 1.4340  |
| EDRN 125 Late CRC  |       | 0.4030  | 0.0190  | 0.0455  | 0.7528  | -0.4881 | -0.2461 |
| EDRN 126 Late CRC  |       |         | 0.7262  | 0.6210  | 0.5794  | 0.2228  | 0.2781  |
| EDRN 127 Late CRC  |       |         | 0.3346  | 0.3973  |         | 0.2503  | 0.5129  |
| EDRN 128 Late CRC  |       | 0.8814  | -0.2143 | 0.7910  | 1.2028  | 0.5311  | 0.4673  |
| EDRN 129 A-Adenoma |       | 0.5200  | -0.2352 | 0.7873  | 1.5238  | 0.3557  | 0.7052  |
| EDRN 130 A-Adenoma |       | 2.1671  | 0.1497  | 0.9322  | 0.6705  | 0.2479  |         |
| EDRN 131 A-Adenoma |       | 1.2355  | -0.6376 | 0.7997  | 0.3105  | 0.9200  | 1.4794  |
| EDRN 132 A-Adenoma |       | 0.9520  | -0.1267 | 0.6163  | 0.6993  | -0.8229 | 1.0039  |
| EDRN 133 Adenomas  |       | 0.3061  | -0.0310 | -0.0114 | 0.0183  | -0.0715 | 0.1174  |
| EDRN 134 Adenomas  |       | 0.4705  | -0.4031 | -1.0819 | 0.5385  | -1.2935 | 0.8335  |
| EDRN 135 Adenomas  |       |         | -0.7441 | 0.6624  | 1.0753  | 0.3816  |         |
| EDRN 136 Adenomas  |       |         | -2.5203 | 1.9862  |         | -0.7054 | 1.9865  |
| EDRN 137 Sv normal |       | 1.6026  | -0.1326 | 0.0404  | -0.2007 | 0.2922  | -0.0626 |
| EDRN 138 Sv normal |       |         | 0.3749  | 0.3196  | -0.0447 | -0.3403 | -1.4540 |
| EDRN 139 Sv normal |       |         | -0.6781 | 0.7201  | 0.5802  | 0.6532  | 1.5497  |
| EDRN 140 Sv normal |       |         | 0.1589  | 0.4588  | 0.2887  | 0.7559  | 0.7820  |
| EDRN 141 Sc normal |       |         | -0.5775 | 0.4811  | 0.4029  | 0.4265  |         |
| EDRN 142 Sc normal |       | -1.6920 | -0.7974 | -0.9496 | 2.2743  | 0.5362  | -1.3867 |
| EDRN 143 Sc normal |       |         | -0.7082 | 0.0102  | -0.2367 | -0.9195 | 0.3977  |
| EDRN 144 Sc normal |       |         | -1.0302 | -1.7322 | -0.2367 | -0.6157 | 2.2867  |
| EDRN 145 Early CRC |       | 0.6277  | -0.2921 | 1.6093  |         | -0.1348 | 1.1923  |
| EDRN 146 Early CRC |       | 2.9842  | -0.3662 | -0.1929 | 0.7686  | -1.6471 | -0.3246 |
| EDRN 147 Early CRC |       | 1.6937  | -0.5866 | 1.6656  | 0.4923  | 0.3064  | 4.3937  |
| EDRN 148 Early CRC |       | 0.2355  | -0.5891 | 1.0040  | 0.8857  | 0.1882  | 1.0472  |
| EDRN 149 Late CRC  |       |         | -0.7624 | 0.5836  | 0.8326  | -0.3284 | -0.1109 |
| EDRN 150 Late CRC  |       | 0.8657  | -0.2827 |         | 0.6190  | 0.6870  | 0.9569  |
| EDRN 151 Late CRC  |       | 0.5214  | -0.9016 | 1.2004  |         | 0.8986  | 0.9854  |
| EDRN 152 Late CRC  |       |         | -0.3211 | 0.6844  | 0.3044  | 0.1773  | 0.4872  |
| EDRN 153 A-Adenoma |       | 0.5403  | -0.4600 | -0.6563 | 1.0249  | -0.2128 | -0.8408 |
| EDRN 154 A-Adenoma |       | 0.5753  | -0.2338 | 0.1583  | 0.8003  | -0.3862 | -0.1684 |
| EDRN 155 A-Adenoma |       | 0.1328  | -0.2232 | 0.6130  | 0.6679  | 1.0229  | 0.8886  |
| EDRN 156 A-Adenoma |       | 0.3472  | -0.3216 |         | 0.9714  | 0.1515  |         |
| EDRN 157 Adenomas  |       | 0.9658  | 0.2759  | 0.4705  | 0.5580  |         | 0.3424  |

| Sample ID         | Status    | GABRP | GCN1L1  | GPR125  | GRB2    | grn     | GSDMB   | HOXA3   |
|-------------------|-----------|-------|---------|---------|---------|---------|---------|---------|
| Confirmed in EDRN |           |       |         |         | v       | v       |         | v       |
| EDRN 158          | Adenomas  |       | 0.8656  | -0.4950 | 0.4738  | 0.5302  | 0.3941  | 1.2899  |
| EDRN 159          | Adenomas  |       | -0.0099 | -0.3703 | -1.8991 |         | 0.8353  | 0.0883  |
| EDRN 160          | Adenomas  |       | -0.1202 | -1.0925 | 1.3452  | -0.2159 | -2.4679 | 0.4608  |
| EDRN 161          | Sv normal |       | 0.1005  | -0.0894 | -0.4003 | -0.0660 | 0.0333  | 0.4706  |
| EDRN 162          | Sv normal |       | 0.2748  | 0.0603  | -0.7782 | 0.5206  | -1.0753 | 0.8251  |
| EDRN 163          | Sv normal |       | 0.3010  | 0.1329  | -0.0519 | -0.1131 | -0.6246 | -1.1392 |
| EDRN 164          | Sv normal |       | 0.0163  | 0.5495  | -0.3398 | 0.2118  | -0.4149 | -0.0220 |
| EDRN 165          | Sc normal |       | 0.0772  | 0.5664  | -0.5774 | 0.0045  | -0.6886 | 0.1067  |
| EDRN 166          | Sc normal |       | 0.5986  | 0.4742  |         | 1.7868  | 1.8476  | -0.1737 |
| EDRN 167          | Sc normal |       | 1.9121  |         | 0.4398  | 0.3184  | -0.5807 | 0.2405  |
| EDRN 168          | Sc normal |       |         | 0.5415  | 0.8972  | 0.5792  | 0.5003  | 0.5889  |
| EDRN 169          | Early CRC |       | 2.3087  | -0.0350 | 1.6089  | 1.4374  | -0.4157 | 1.0693  |
| EDRN 170          | Early CRC |       |         | -1.0857 | -0.3329 | 1.2539  | 0.9837  | -0.6146 |
| EDRN 171          | Late CRC  |       |         | -0.6789 | 1.6918  | 0.4438  | -0.3849 | 0.7677  |
| EDRN 172          | Late CRC  |       |         | -1.1869 | 2.4509  | 1.4793  | 0.1905  | 1.2656  |
| EDRN 173          | A-Adenoma |       |         | 0.0259  | 0.4099  | 0.6651  | -0.6048 | 0.6470  |
| EDRN 174          | A-Adenoma |       |         | 0.6497  | 0.2569  | 0.4045  | -0.5271 | 1.7764  |
| EDRN 175          | Adenomas  |       |         | -0.2784 | -0.2244 | 0.2908  | -0.2185 | -0.3056 |
| EDRN 176          | Adenomas  |       | -0.2947 | -0.2699 | 0.1839  | 0.9539  | -0.1939 | 1.2741  |
| EDRN 177          | Sv normal |       | 0.3974  | 0.8275  | 1.6506  | 1.0220  | -0.3857 | 0.6508  |
| EDRN 178          | Sv normal |       |         | 0.2110  | 0.3799  | 0.4644  | 0.7455  | 0.0604  |
| EDRN 179          | Sc normal |       | -0.0464 | -0.7249 | -1.2307 | -2.4719 | -0.1893 | -1.6312 |
| EDRN 180          | Sc normal |       |         | 0.1618  | -3.2739 | 0.8726  | 0.2395  | 1.1620  |



| Sample ID         | Status  | IL1B   | IL6ST   | ITGA2   | KDM5D   | KIF20A  | LOC441347 | LYPD1   |
|-------------------|---------|--------|---------|---------|---------|---------|-----------|---------|
| Confirmed in EDRN |         | v      |         |         |         |         |           |         |
| CHS 1             | Control | 8.1898 | -7.7609 | -4.1176 | -5.2730 | -5.1012 | -11.3723  | -1.1027 |
| CHS 2             | Cancer  | 8.2856 | -7.4615 | -4.1395 | -5.6556 | -3.7287 | -11.2534  | -1.5907 |
| CHS 3             | Cancer  | 8.0742 | -7.3089 | -3.7208 | -5.0096 | -3.6263 | -10.4049  | -1.5031 |
| CHS 4             | Control | 6.4280 | -6.9898 | -4.7238 | -8.0838 | -4.3133 | -12.9254  | -2.9059 |
| CHS 5             | Control | 7.4647 | -6.5871 | -4.1613 | -5.1207 | -4.2980 | -11.0823  | -2.5906 |
| CHS 6             | Cancer  | 6.9380 | -6.9947 | -2.5854 | -6.8777 | -3.8089 | -11.9551  | -1.2194 |
| CHS 7             | Control | 7.1859 | -5.3067 | -4.3112 | -7.3056 | -4.1706 | -12.4697  | -1.9850 |
| CHS 8             | Cancer  | 7.0945 | -5.3054 | -4.0108 | -6.2876 | -4.3888 | -12.1043  | -2.1517 |
| CHS 9             | Cancer  | 8.2875 | -6.2053 | -3.5784 | -5.3900 | -3.9338 | -12.4364  | -1.2712 |
| CHS 10            | Control | 8.8051 | -6.8893 | -4.0989 | -6.3220 | -4.3493 | -11.0828  | -1.3532 |
| CHS 11            | Control | 6.5803 | -7.7993 | -2.9713 | -8.7246 | -4.0053 | -13.2102  | -2.9687 |
| CHS 12            | Cancer  | 9.9587 | -7.0571 | -2.5612 | -5.4826 | -3.3669 | -10.5561  | -1.1299 |
| CHS 13            | Cancer  | 9.6859 | -5.7929 | -3.8883 | -4.6477 | -3.2285 | -10.4770  | -1.7203 |
| CHS 14            | Control | 8.9527 | -7.2933 | -5.2366 | -6.1341 | -3.2225 | -12.2578  | -1.4878 |
| CHS 15            | Control | 7.1992 | -5.6358 | -4.6035 | -6.7174 | -4.4381 | -11.7633  | -2.4296 |
| CHS 16            | Cancer  | 6.6570 | -6.7742 | -4.6867 | -6.8890 | -3.4235 | -11.4393  | -1.7822 |
| CHS 17            | Cancer  | 7.0541 | -5.5491 | -3.3866 | -4.3906 | -4.5548 | -12.2033  | -2.4003 |
| CHS 18            | Control | 8.7824 | -5.9790 | -4.5794 | -4.9395 | -3.7008 | -11.1905  | -2.7570 |
| CHS 19            | Cancer  | 7.5303 | -7.2836 | -3.4171 | -6.9479 | -4.0715 | -11.8114  | -2.1217 |
| CHS 20            | Control | 6.4602 | -7.2406 | -5.3442 | -8.3849 | -4.7001 | -12.0544  | -3.3091 |
| CHS 21            | Cancer  | 7.8567 | -4.7628 | -3.4102 | -5.0390 | -2.8417 | -9.7896   | -2.6604 |
| CHS 22            | Control | 7.2911 | -7.4286 | -4.1369 | -6.7360 | -4.7300 | -13.0686  | -2.8496 |
| CHS 23            | Cancer  | 7.8639 | -6.0811 | -6.4736 | -4.8275 | -3.4338 | -11.5147  | -2.6176 |
| CHS 24            | Control | 3.9692 | -7.6335 | -4.7557 | -8.7048 | -7.3317 | -15.8826  | -8.5362 |
| CHS 25            | Cancer  | 8.3020 | -7.0616 | -4.7401 | -5.9187 | -3.4818 | -11.2171  | -1.9881 |
| CHS 26            | Control | 7.9879 | -6.5604 | -4.7225 | -6.4818 | -3.5283 | -11.2300  | -2.5740 |
| CHS 27            | Cancer  | 8.5816 | -5.4641 | -3.5799 | -5.9082 | -2.9481 | -11.2979  | -2.4688 |
| CHS 28            | Control | 8.0014 | -7.0611 | -4.0359 | -5.4495 | -4.0791 | -11.3242  | -1.7136 |
| CHS 29            | Cancer  | 7.6214 | -7.2424 | -3.3580 | -5.2091 | -4.2131 | -11.6490  | -2.4564 |
| CHS 30            | Control | 7.6256 | -6.3977 | -3.0137 | -5.5705 | -3.5565 | -11.3977  | -2.8344 |
| CHS 31            | Control | 7.5403 | -7.0734 | -5.0027 | -5.0359 | -3.8371 | -12.3999  | -1.6734 |
| CHS 32            | Cancer  | 7.4148 | -6.9200 | -3.2875 | -5.6083 | -3.7018 | -12.5805  | -2.5339 |
| CHS 33            | Cancer  | 7.9877 | -5.9262 | -5.2822 | -5.0488 | -2.4665 | -9.5036   | -2.1598 |
| CHS 34            | Control | 7.9677 | -7.4729 | -5.4571 | -6.6300 | -5.0930 | -12.2909  | -2.7339 |
| CHS 35            | Control | 8.3024 | -8.1158 | -3.4032 | -7.2075 | -4.9328 | -12.3023  | -2.5101 |
| CHS 36            | Cancer  | 7.5148 | -7.4941 | -3.7913 | -6.1504 | -4.5998 | -11.8119  | -2.2665 |
| CHS 37            | Cancer  | 7.4346 | -5.7705 | -4.4285 | -6.4630 | -4.1533 | -12.2641  | -2.4138 |
| CHS 38            | Control | 6.3532 | -7.9225 | -4.2737 | -7.5688 | -4.3846 | -12.5442  | -2.0499 |
| CHS 39            | Control | 6.9149 | -7.6962 | -4.5283 | -6.6367 | -6.3996 | -14.0902  | -3.5372 |
| CHS 40            | Cancer  | 7.9166 | -6.4418 | -3.5814 | -6.0212 | -4.0066 | -11.8496  | -1.9025 |
| CHS 41            | Control | 7.0728 | -6.5306 | -3.2030 | -6.8540 | -5.1180 | -11.6400  | -3.1742 |
| CHS 42            | Cancer  | 7.6581 | -6.9225 | -4.4922 | -7.5128 | -4.3033 | -12.4245  | -2.1571 |
| CHS 43            | Control | 6.3764 | -5.2688 | -3.5369 | -6.2656 | -3.8500 | -11.6498  | -2.9008 |
| CHS 44            | Cancer  | 8.6850 | -5.6166 | -4.3729 | -6.8345 | -4.3998 | -11.7704  | -2.0676 |
| CHS 45            | Control | 7.0448 | -6.1862 | -4.6667 | -6.2270 | -3.6982 | -11.8306  | -2.3341 |

| Sample ID         | Status  | IL1B   | IL6ST   | ITGA2   | KDM5D   | KIF20A  | LOC441347 | LYPD1   |
|-------------------|---------|--------|---------|---------|---------|---------|-----------|---------|
| Confirmed in EDRN |         | v      |         |         |         |         |           |         |
| CHS 46            | Cancer  | 7.9302 | -5.6988 | -4.2680 | -5.7720 | -3.3549 | -11.0993  | -1.7432 |
| CHS 47            | Cancer  | 6.5495 | -6.2781 | -3.9317 | -6.9706 | -4.1741 | -12.0433  | -2.1152 |
| CHS 48            | Control | 7.8112 | -5.9983 | -3.9415 | -6.5461 | -4.4878 | -12.0945  | -2.1355 |
| CHS 49            | Cancer  | 8.2194 | -6.1682 | -3.9577 | -7.4481 | -4.3564 | -11.7214  | -2.1586 |
| CHS 50            | Control | 7.4948 | -7.0113 | -4.5114 | -5.1929 | -4.1351 | -12.1034  | -2.2666 |
| CHS 51            | Cancer  | 7.7333 | -7.1851 | -4.2882 | -6.5038 | -4.2518 | -12.1172  | -2.1587 |
| CHS 52            | Control | 7.1709 | -7.7535 | -4.1948 | -6.7540 | -3.7854 | -12.0116  | -2.7017 |
| CHS 53            | Control | 7.6684 | -7.1257 | -4.1346 | -6.9759 | -4.5907 | -11.6946  | -1.8516 |
| CHS 54            | Cancer  | 8.2176 | -7.1832 | -4.3384 | -6.7114 | -3.6876 | -11.2695  | -1.5977 |
| CHS 55            | Cancer  | 7.9806 | -6.1212 | -4.3959 | -7.0153 | -4.5899 | -12.3338  | -2.2738 |
| CHS 56            | Control | 7.3012 | -5.1929 | -4.3494 | -6.4434 | -3.9057 | -11.2811  | -2.0307 |
| CHS 57            | Control | 7.8662 | -7.2016 | -5.2764 | -6.1556 | -4.5800 | -11.4854  | -2.6901 |
| CHS 58            | Cancer  | 7.9800 | -6.0566 | -4.0651 | -7.3059 | -4.2987 | -11.6054  | -1.6403 |
| CHS 59            | Cancer  | 7.0076 | -5.3526 | -3.2849 | -6.1406 | -3.9166 | -12.5565  | -2.6116 |
| CHS 60            | Control | 7.0034 | -6.2192 | -4.8013 | -6.7934 | -4.9314 | -12.1014  | -2.6221 |
| CHS 61            | Cancer  | 6.6279 | -7.3359 | -4.4015 | -5.2772 | -3.2291 | -11.5872  | -2.4642 |
| CHS 62            | Control | 6.7866 | -8.8838 | -3.4708 | -7.6095 | -5.8879 | -13.4669  | -4.0957 |
| CHS 63            | Cancer  | 6.8456 | -5.1993 | -3.6952 | -4.4274 | -2.7778 | -11.3723  | -2.0974 |
| CHS 64            | Control | 8.0448 | -7.4118 | -4.4343 | -6.0098 | -3.8628 | -12.8257  | -3.2818 |
| CHS 65            | Cancer  | 8.0670 | -2.4444 | -4.1076 | -4.8207 | -2.3459 | -10.0031  | -1.2230 |
| CHS 66            | Control | 8.2246 | -7.7992 | -4.4514 | -5.2897 | -4.0873 | -11.5130  | -0.9463 |
| CHS 67            | Control | 6.5833 | -8.2508 | -4.8261 | -7.2141 | -5.7297 | -12.4843  | -4.5747 |
| CHS 68            | Cancer  | 8.1389 | -6.5984 | -3.2855 | -5.9398 | -4.2779 | -12.0096  | -3.1133 |
| CHS 69            | Cancer  | 9.4461 | -7.7340 | -3.9302 | -5.7275 | -3.9953 | -11.8037  | -1.8685 |
| CHS 70            | Control | 8.3497 | -8.0443 | -3.2751 | -5.6176 | -3.5174 | -10.8626  | -1.6684 |
| CHS 71            | Cancer  | 7.0564 | -6.9376 | -3.5138 | -6.2418 | -4.3896 | -11.8973  | -2.0592 |
| CHS 72            | Control | 6.7805 | -3.9104 | -3.9091 | -6.2757 | -3.6382 | -12.1983  | -2.4479 |
| CHS 73            | Control | 5.8734 | -7.6694 | -3.4308 | -7.4825 | -5.1022 | -13.9411  | -3.2632 |
| CHS 74            | Cancer  | 8.1603 | -5.9037 | -3.5759 | -5.4226 | -4.7732 | -10.7124  | -0.7779 |
| CHS 75            | Cancer  | 8.1746 | -7.0347 | -3.6413 | -5.9878 | -3.8965 | -11.6959  | -1.9112 |
| CHS 76            | Control | 8.1929 | -6.6939 | -3.8350 | -6.3830 | -4.0954 | -11.8984  | -3.3388 |
| CHS 77            | Control | 7.8510 | -7.1095 | -4.0995 | -7.0217 | -5.4012 | -12.3697  | -2.6789 |
| CHS 78            | Cancer  | 7.9701 | -2.2712 | -4.3471 | -5.9859 | -4.3920 | -11.0713  | -2.0711 |
| CHS 79            | Cancer  | 8.2961 | -6.7354 | -4.3193 | -5.6402 | -3.2234 | -11.7498  | -1.0503 |
| CHS 80            | Control | 7.2222 | -7.2492 | -3.3444 | -6.1942 | -4.2940 | -11.8627  | -1.6596 |
| CHS 81            | Control | 7.4477 | -5.3411 | -4.6425 | -6.6371 | -4.1814 | -12.2721  | -2.0205 |
| CHS 82            | Cancer  | 8.2162 | -7.6858 | -3.8629 | -6.6122 | -4.1308 | -12.0427  | -1.1406 |
| CHS 83            | Cancer  | 8.4076 | -2.8167 | -3.7090 | -5.9215 | -3.6092 | -11.0272  | -1.8954 |
| CHS 84            | Control | 6.8408 | -8.5972 | -3.5367 | -6.6701 | -3.3926 | -11.8747  | -2.0214 |
| CHS 85            | Cancer  | 7.4589 | -5.7005 | -3.8865 | -6.0343 | -3.8108 | -11.8794  | -2.0472 |
| CHS 86            | Control | 7.2030 | -6.7428 | -4.9640 | -6.5238 | -4.5098 | -11.2830  | -2.6355 |
| CHS 87            | Control | 6.3624 | -8.5631 | -6.2164 | -7.3589 | -5.0499 | -12.1682  | -2.9581 |
| CHS 88            | Cancer  | 7.8601 | -6.9672 | -3.8902 | -6.7258 | -4.3738 | -12.9139  | -3.2400 |
| CHS 89            | Control | 7.5547 | -6.9325 | -3.8697 | -5.9876 | -3.6597 | -11.2295  | -2.1797 |
| CHS 90            | Cancer  | 8.1158 | -7.0793 | -3.2641 | -5.7811 | -4.7678 | -11.3394  | -2.2354 |

| Sample ID         | Status  | IL1B   | IL6ST   | ITGA2   | KDM5D   | KIF20A  | LOC441347 | LYPD1   |
|-------------------|---------|--------|---------|---------|---------|---------|-----------|---------|
| Confirmed in EDRN |         | v      |         |         |         |         |           |         |
| CHS 91            | Cancer  | 7.1279 | -7.7473 | -3.4032 | -5.6327 | -4.6346 | -12.7063  | -2.5666 |
| CHS 92            | Control | 7.4729 | -7.1061 | -4.1348 | -6.2501 | -4.5447 | -11.9015  | -2.5951 |
| CHS 93            | Control | 7.4698 | -6.8632 | -4.7660 | -6.4514 | -2.8406 | -11.3498  | -3.5391 |
| CHS 94            | Cancer  | 8.2348 | -6.6983 | -4.5231 | -6.1932 | -2.6169 | -11.7534  | -3.3186 |
| CHS 95            | Control | 7.3856 | -6.6436 | -5.7967 | -5.3809 | -4.0494 | -11.6539  | -2.2136 |
| CHS 96            | Cancer  | 7.6962 | -6.9689 | -3.8398 | -5.6125 | -3.4181 | -11.6093  | -3.0861 |
| CHS 97            | Cancer  | 6.8734 | -6.7394 | -4.7380 | -6.1592 | -4.3395 | -11.3056  | -2.4714 |
| CHS 98            | Control | 7.3761 | -9.9711 | -3.7486 | -7.2873 | -5.9408 | -13.0101  | -2.8674 |
| CHS 99            | Cancer  | 7.9122 | -6.8963 | -3.8836 | -6.8295 | -4.1918 | -12.4248  | -2.4348 |
| CHS 100           | Control | 7.7020 | -6.2702 | -5.8774 | -6.4646 | -0.7916 | -12.1098  | -2.1721 |
| CHS 101           | Cancer  | 8.3523 | -5.5671 | -5.1888 | -5.4860 | -3.0579 | -10.4921  | -2.0053 |
| CHS 102           | Control | 7.9060 | -5.6237 | -4.7066 | -5.0701 | -3.6332 | -10.6481  | -2.8313 |
| CHS 103           | Cancer  | 8.6631 | -6.4129 | -4.3160 | -4.8280 | -3.8509 | -11.2251  | -1.7090 |
| CHS 104           | Control | 6.6794 | -5.9859 | -4.5655 | -6.8286 | -4.0552 | -11.9515  | -3.6766 |
| CHS 105           | Cancer  | 7.8780 | -5.7021 | -4.4792 | -6.2321 | -4.3557 | -11.4260  | -2.0764 |
| CHS 106           | Control | 6.5712 | -6.5256 | -4.5664 | -6.8985 | -4.8530 | -11.7827  | -3.4168 |
| CHS 107           | Cancer  | 7.6723 | -6.4143 | -3.6191 | -6.1950 | -4.5794 | -11.8004  | -2.6462 |
| CHS 108           | Control | 6.6147 | -7.4018 | -4.7351 | -6.7752 | -3.2640 | -12.1533  | -2.1503 |
| CHS 109           | Control | 8.3279 | -6.3216 | -4.1383 | -5.9977 | -4.6916 | -11.8115  | -2.4744 |
| CHS 110           | Cancer  | 7.3456 | -7.4439 | -3.1043 | -7.3412 | -4.9996 | -13.5351  | -2.6190 |
| CHS 111           | Control | 7.2210 | -6.2467 | -4.0361 | -7.2049 | -5.7077 | -12.5753  | -2.7933 |
| CHS 112           | Cancer  | 7.3779 | -6.9902 | -3.8450 | -5.5154 | -3.8931 | -11.2839  | -1.4188 |
| CHS 113           | Control | 8.7915 | -5.9210 | -3.7498 | -5.6795 | -3.4646 | -10.8429  | -1.0304 |
| CHS 114           | Cancer  | 8.5073 | -6.9650 | -3.0686 | -5.7567 | -3.6315 | -11.4814  | -1.7778 |
| CHS 117           | Control | 6.2792 | -6.8543 | -3.6908 | -6.2025 | -5.0792 | -11.9854  | -2.1948 |
| CHS 118           | Cancer  | 7.7021 | -7.2751 | -3.7243 | -6.2126 | -4.3477 | -13.7110  | -2.4135 |
| CHS 119           | Cancer  | 8.0547 | -6.5949 | -3.6062 | -6.1367 | -4.2022 | -11.3729  | -2.2654 |
| CHS 120           | Control | 7.5707 | -5.7374 | -3.2696 | -6.2989 | -3.6073 | -11.6844  | -2.2951 |
| CHS 121           | Control | 6.2276 | -7.3167 | -4.5828 | -6.1525 | -5.4533 | -13.2949  | -2.8565 |
| CHS 122           | Cancer  | 7.7011 | -6.2931 | -4.0137 | -5.9669 | -4.4267 | -11.2695  | -2.5661 |
| CHS 123           | Cancer  | 8.8873 | -6.6585 | -3.5700 | -6.0911 | -4.6921 | -11.6099  | -2.3757 |
| CHS 124           | Control | 7.6086 | -7.4972 | -4.4019 | -6.0045 | -3.6337 | -11.7738  | -1.7295 |
| CHS 125           | Cancer  | 7.9240 | -7.5049 | -4.8181 | -6.9371 | -5.1917 | -11.6901  | -2.8783 |
| CHS 126           | Control | 8.3501 | -7.2518 | -4.6698 | -6.5892 | -3.6408 | -12.1807  | -2.3104 |
| CHS 127           | Cancer  | 7.2082 | -5.5873 | -4.8468 | -4.7033 | -1.6279 | -10.2961  | -1.2731 |
| CHS 128           | Control | 6.0296 | -6.0011 | -4.5993 | -7.1162 | -5.7770 | -14.3787  | -4.1140 |
| CHS 129           | Control | 6.5374 | -7.4553 | -0.4746 | -7.6293 | -5.0902 | -13.6058  | -3.2472 |
| CHS 130           | Cancer  | 7.8429 | -7.1826 | -2.7250 | -6.5282 | -4.7073 | -12.6498  | -2.5736 |
| CHS 131           | Cancer  | 7.8372 | -5.6681 | -4.1505 | -5.5117 | -3.6106 | -10.9168  | -1.8741 |
| CHS 132           | Control | 8.2652 | -6.0166 | -4.0917 | -5.7428 | -3.7859 | -11.3523  | -1.7029 |
| CHS 133           | Cancer  | 6.1885 | -7.4848 | -3.7108 | -7.6092 | -5.2292 | -12.7664  | -3.6422 |
| CHS 134           | Control | 7.4674 | -7.0828 | -4.7849 | -6.3589 | -4.4174 | -12.5624  | -3.5320 |
| CHS 135           | Cancer  | 8.4083 | -6.0946 | -3.8104 | -6.1689 | -3.9020 | -11.8141  | -1.6480 |
| CHS 136           | Control | 8.2188 | -6.4813 | -4.4315 | -5.8979 | -2.9501 | -11.0716  | -1.6205 |
| CHS 137           | Cancer  | 7.9209 | -5.8371 | -4.2209 | -6.0874 | -3.9179 | -11.8161  | -2.3632 |

| Sample ID Status  | IL1B   | IL6ST   | ITGA2   | KDM5D   | KIF20A  | LOC441347 | LYPD1   |
|-------------------|--------|---------|---------|---------|---------|-----------|---------|
| Confirmed in EDRN | v      |         |         |         |         |           | v       |
| CHS 138 Control   | 7.8345 | -6.6648 | -4.1357 | -6.4830 | -3.8095 | -12.1398  | -2.1235 |
| CHS 139 Cancer    | 7.8529 | -6.2499 | -3.3265 | -5.5055 | -3.9162 | -11.2748  | -1.3388 |
| CHS 140 Control   | 7.7720 | -6.8317 | -5.2524 | -5.6560 | -3.9454 | -10.5642  | -1.8378 |
| CHS 141 Cancer    | 7.3625 | -6.9521 | -4.4927 | -5.9943 | -4.0080 | -10.5858  | -2.2043 |
| CHS 142 Control   | 7.8345 | -6.5517 | -4.9586 | -6.4715 | -4.3196 | -11.6378  | -1.9670 |
| CHS 143 Cancer    | 7.2919 | -6.7389 | -4.3376 | -6.9811 | -3.6019 | -11.0904  | -2.5531 |
| CHS 144 Control   | 8.0235 | -5.7175 | -4.4926 | -5.7045 | -3.1137 | -11.9633  | -2.1123 |
| CHS 145 Cancer    | 8.0226 | -6.3312 | -4.2683 | -7.7389 | -5.1618 | -12.9574  | -2.7520 |
| CHS 146 Control   | 7.6299 | -6.3488 | -4.3345 | -7.4359 | -4.6891 | -11.9195  | -2.3610 |
| CHS 147 Cancer    | 7.8465 | -5.3041 | -3.8022 | -6.0341 | -3.1989 | -11.7043  | -2.0803 |
| CHS 148 Control   | 7.8281 | -6.5483 | -4.3869 | -5.2907 | -2.5805 | -11.2666  | -1.9719 |
| CHS 149 Control   | 9.1791 | -7.3827 | -2.0079 | -6.4098 | -4.2238 | -11.4531  | -2.7977 |
| CHS 150 Cancer    | 7.1783 | -6.8472 | -5.3273 | -5.4499 | -5.3694 | -11.8140  | -2.8747 |
| CHS 151 Control   | 7.0321 | -6.8817 | -3.8335 | -6.6607 | -4.8417 | -12.1996  | -2.3521 |
| CHS 152 Cancer    | 7.8631 | -6.6162 | -4.3517 | -5.1934 | -4.6825 | -12.1730  | -2.0652 |
| CHS 153 Control   | 6.5066 | -7.9559 | -4.3274 | -7.4486 | -3.8125 | -12.1782  | -2.8339 |
| CHS 154 Cancer    | 6.9843 | -7.0815 | -4.2052 | -5.2836 | -3.6505 | -11.1509  | -2.1360 |
| CHS 155 Cancer    | 8.9290 | -6.7902 | -3.7760 | -5.4499 | -3.1981 | -10.8744  | -1.9095 |
| CHS 156 Control   | 7.6755 | -6.8525 | -2.5063 | -5.9256 | -5.0055 | -12.3770  | -2.0169 |
| CHS 157 Cancer    | 6.8877 | -5.7303 | -4.4251 | -6.4856 | -3.1774 | -11.6817  | -2.8499 |
| CHS 158 Control   | 7.7137 | -6.4518 | -4.9736 | -6.0091 | -4.6149 | -12.9458  | -2.4330 |
| CHS 159 Cancer    | 7.1873 | -6.9180 | -5.0038 | -6.7199 | -3.4861 | -11.4770  | -1.9298 |
| CHS 160 Control   | 7.2661 | -6.0401 | -4.4028 | -6.3917 | -4.1527 | -11.3644  | -2.2654 |
| EDRN 1 Early CRC  |        | 1.1768  |         |         | 2.2114  |           | 1.0929  |
| EDRN 2 Early CRC  |        |         | -0.2572 |         |         |           | -2.9172 |
| EDRN 3 Early CRC  |        | 1.4579  |         |         |         |           | 0.5415  |
| EDRN 4 Early CRC  |        | 0.1283  | -1.4025 |         | -0.1848 |           | -0.2028 |
| EDRN 5 Late CRC   |        |         |         |         | -0.8151 |           | 0.5202  |
| EDRN 6 Late CRC   |        |         |         |         | -0.1384 |           | 0.6195  |
| EDRN 7 Late CRC   |        | -0.0834 |         |         | 2.7673  |           | 0.7683  |
| EDRN 8 Late CRC   |        |         | -0.1276 |         |         |           | -0.2021 |
| EDRN 9 A-Adenoma  |        | 1.2414  | -0.2778 |         | -0.4881 |           | 0.2013  |
| EDRN 10 A-Adenoma |        |         | -2.0628 |         |         |           | -0.2260 |
| EDRN 11 A-Adenoma |        | 0.0770  | -0.9623 |         | 0.1629  |           | 0.9232  |
| EDRN 12 A-Adenoma |        |         | -1.3636 |         | 0.0164  |           | 0.8688  |
| EDRN 13 Adenomas  |        | -0.5969 | -0.1296 |         | -0.8106 |           | -0.6368 |
| EDRN 14 Adenomas  |        | 0.5138  |         |         | -0.6291 |           | 1.0505  |
| EDRN 15 Adenomas  |        | 0.7708  | -1.1978 |         | -0.0090 |           | 0.8642  |
| EDRN 16 Adenomas  |        | 0.6078  |         |         | 0.7966  |           | 0.3247  |
| EDRN 17 Sv normal |        | 1.4117  | -1.4151 |         | 1.3426  |           | 0.5007  |
| EDRN 18 Sv normal |        |         |         |         | 0.7993  |           | 0.8523  |
| EDRN 19 Sv normal |        | -0.5565 | 0.1285  |         | 1.2522  |           | 0.2879  |
| EDRN 20 Sv normal |        | 0.8258  | -1.2617 |         | 1.8802  |           | 0.5841  |
| EDRN 21 Sc normal |        |         |         |         | 0.6489  |           | 0.4202  |
| EDRN 22 Sc normal |        |         |         |         | 2.9373  |           | 0.2579  |

| Sample ID         | Status    | IL1B | IL6ST   | ITGA2   | KDM5D | KIF20A  | LOC441347 | LYPD1   |
|-------------------|-----------|------|---------|---------|-------|---------|-----------|---------|
| Confirmed in EDRN |           | v    |         |         |       |         |           |         |
| EDRN 23           | Sc normal |      | -1.4854 |         |       |         |           | 0.1083  |
| EDRN 24           | Sc normal |      |         | -0.6436 |       | 0.0489  |           | 0.3224  |
| EDRN 25           | Early CRC |      | 0.1864  |         |       |         |           | 0.5562  |
| EDRN 26           | Early CRC |      | -0.2006 | -1.3967 |       | 0.3648  |           | 0.6175  |
| EDRN 27           | Early CRC |      | 1.8374  | 0.0035  |       | -0.3195 |           | -1.4186 |
| EDRN 28           | Early CRC |      |         |         |       | 0.4816  |           | 0.8904  |
| EDRN 29           | Late CRC  |      | 0.8172  | -0.1524 |       |         |           | -0.1558 |
| EDRN 30           | Late CRC  |      |         | -0.4115 |       |         |           | 1.1122  |
| EDRN 31           | Late CRC  |      | 0.1016  | -0.7007 |       |         |           | 0.5163  |
| EDRN 32           | Late CRC  |      |         | -1.0190 |       |         |           | 0.2180  |
| EDRN 33           | A-Adenoma |      |         |         |       | 0.2715  |           | 1.1198  |
| EDRN 34           | A-Adenoma |      |         |         |       |         |           | 0.5655  |
| EDRN 35           | A-Adenoma |      |         |         |       |         |           | 0.4104  |
| EDRN 36           | A-Adenoma |      |         |         |       | 3.2199  |           | 0.8602  |
| EDRN 37           | Adenomas  |      | 1.2170  |         |       | -0.1277 |           | 0.7005  |
| EDRN 38           | Adenomas  |      |         |         |       |         |           | 0.8631  |
| EDRN 39           | Adenomas  |      |         |         |       |         |           | 0.5322  |
| EDRN 40           | Adenomas  |      |         |         |       |         |           | -2.5092 |
| EDRN 41           | Sv normal |      |         |         |       |         |           | 0.2702  |
| EDRN 42           | Sv normal |      |         |         |       |         |           | 0.8092  |
| EDRN 43           | Sv normal |      |         |         |       | 0.2221  |           | 0.0470  |
| EDRN 44           | Sv normal |      | -0.4682 | -1.6251 |       | 0.2054  |           | 0.0283  |
| EDRN 45           | Sc normal |      |         | -1.5021 |       | 0.5067  |           | 0.2843  |
| EDRN 46           | Sc normal |      |         | -0.0772 |       |         |           |         |
| EDRN 47           | Sc normal |      | -0.1673 | -0.9129 |       | 0.8078  |           | -0.0900 |
| EDRN 48           | Sc normal |      |         | -0.9557 |       | 0.8568  |           | 0.6640  |
| EDRN 49           | Early CRC |      |         |         |       |         |           | 0.4736  |
| EDRN 50           | Early CRC |      |         | 0.2373  |       |         |           | -1.4666 |
| EDRN 51           | Early CRC |      |         |         |       |         |           | 0.4832  |
| EDRN 52           | Early CRC |      |         | -2.0137 |       |         |           | 0.3322  |
| EDRN 53           | Late CRC  |      |         | -0.9522 |       |         |           | 0.6711  |
| EDRN 54           | Late CRC  |      |         | -1.3435 |       |         |           | 0.1419  |
| EDRN 55           | Late CRC  |      |         |         |       |         |           | 0.2581  |
| EDRN 56           | Late CRC  |      |         |         |       |         |           | 0.4816  |
| EDRN 57           | A-Adenoma |      |         | -2.1383 |       |         |           | 0.1686  |
| EDRN 58           | A-Adenoma |      |         |         |       |         |           | 0.4888  |
| EDRN 59           | A-Adenoma |      |         |         |       |         |           | 0.4157  |
| EDRN 60           | A-Adenoma |      |         |         |       | 1.2418  |           | 0.2153  |
| EDRN 61           | Adenomas  |      |         | -0.9602 |       |         |           | 0.6204  |
| EDRN 62           | Adenomas  |      | 0.1761  | -1.0923 |       |         |           | 0.7192  |
| EDRN 63           | Adenomas  |      | -0.4818 | -0.6855 |       |         |           | 0.1636  |
| EDRN 64           | Adenomas  |      | 0.2452  | -0.8745 |       | 0.5313  |           | 0.4836  |
| EDRN 65           | Sv normal |      | 0.4971  | 2.5402  |       |         |           | 0.1599  |
| EDRN 66           | Sv normal |      | 1.0445  | -0.9443 |       | -0.1288 |           | 0.5468  |
| EDRN 67           | Sv normal |      | -0.1712 |         |       |         |           | -0.0666 |

| Sample ID         | Status    | IL1B | IL6ST   | ITGA2   | KDM5D | KIF20A  | LOC441347 | LYPD1   |
|-------------------|-----------|------|---------|---------|-------|---------|-----------|---------|
| Confirmed in EDRN |           |      | v       |         |       |         |           | v       |
| EDRN 68           | Sv normal |      | -0.0643 | -1.2494 |       | 0.3179  |           | 0.0173  |
| EDRN 69           | Sc normal |      | 0.1180  |         |       | 0.1136  |           | 0.3184  |
| EDRN 70           | Sc normal |      | -0.5218 | -1.4966 |       |         |           | 0.7007  |
| EDRN 71           | Sc normal |      | 0.3687  |         |       | 0.4794  |           | 0.2986  |
| EDRN 72           | Sc normal |      |         |         |       | 0.9299  |           | 0.2988  |
| EDRN 73           | Early CRC |      | 2.4227  | -1.1460 |       | 1.5856  |           | 1.3485  |
| EDRN 74           | Early CRC |      |         | 0.7746  |       | 0.7568  |           | 1.5367  |
| EDRN 75           | Early CRC |      | 0.5651  | -1.5586 |       | 0.8433  |           | 0.8521  |
| EDRN 76           | Early CRC |      | 0.4853  |         |       | 1.5879  |           | 1.4664  |
| EDRN 77           | Late CRC  |      |         |         |       | 0.7689  |           | 0.8291  |
| EDRN 78           | Late CRC  |      | 0.7518  | -1.1272 |       | 1.3158  |           | 1.1274  |
| EDRN 79           | Late CRC  |      | 1.1879  |         |       | 0.1793  |           | 0.8762  |
| EDRN 80           | Late CRC  |      |         | -2.1687 |       | 0.2826  |           | 0.6988  |
| EDRN 81           | A-Adenoma |      |         | -1.2851 |       | 2.0191  |           | 0.8296  |
| EDRN 82           | A-Adenoma |      |         |         |       | 0.9770  |           | 0.4420  |
| EDRN 83           | A-Adenoma |      | 4.4213  | -1.5246 |       | 1.8183  |           | 0.1923  |
| EDRN 84           | A-Adenoma |      |         | -0.0964 |       | -0.0236 |           | 0.0536  |
| EDRN 85           | Adenomas  |      | -0.3498 |         |       | 1.0212  |           | 0.7091  |
| EDRN 86           | Adenomas  |      | -0.1261 | -0.9746 |       | 0.1958  |           | 0.7012  |
| EDRN 87           | Adenomas  |      | 0.7357  |         |       | 0.8163  |           | 0.7609  |
| EDRN 88           | Adenomas  |      | 0.7268  | -0.7058 |       | 0.0904  |           | 0.4058  |
| EDRN 89           | Sv normal |      | 0.2840  | -0.8711 |       | -0.3032 |           | -0.2749 |
| EDRN 90           | Sv normal |      | -1.3113 | -1.1138 |       | -0.3109 |           | -0.3911 |
| EDRN 91           | Sv normal |      | -0.4817 | -1.8339 |       | -0.0320 |           | 0.9670  |
| EDRN 92           | Sv normal |      | -0.5086 | -0.3692 |       | -0.0119 |           | 0.2790  |
| EDRN 93           | Sc normal |      | -0.6874 | -0.8356 |       | 0.2777  |           | 0.0184  |
| EDRN 94           | Sc normal |      | 0.5755  | 0.0945  |       | 0.1689  |           | -1.6250 |
| EDRN 95           | Sc normal |      | -0.3083 | -0.8438 |       | 1.1512  |           | 0.4586  |
| EDRN 96           | Sc normal |      | -3.1947 | 1.2071  |       | 0.0154  |           | -5.3374 |
| EDRN 97           | Early CRC |      | 0.5914  |         |       | 0.6141  |           | 0.4018  |
| EDRN 98           | Early CRC |      |         |         |       | 0.7803  |           | 1.0746  |
| EDRN 99           | Early CRC |      | -0.2837 | 0.6573  |       | 0.4002  |           | -0.0184 |
| EDRN 100          | Early CRC |      | 0.2120  |         |       | 0.8445  |           | 0.6412  |
| EDRN 101          | Late CRC  |      | 0.5632  |         |       |         |           | 0.8564  |
| EDRN 102          | Late CRC  |      | 0.0815  |         |       | 0.9767  |           | 1.1824  |
| EDRN 103          | Late CRC  |      |         | -0.3338 |       | 0.0984  |           | -0.3062 |
| EDRN 104          | Late CRC  |      | 0.9177  | -0.2534 |       | 0.0412  |           | 0.3176  |
| EDRN 105          | A-Adenoma |      |         | -3.4345 |       | 3.0384  |           | 0.6921  |
| EDRN 106          | A-Adenoma |      |         |         |       | 0.6221  |           | 0.7781  |
| EDRN 107          | A-Adenoma |      |         |         |       |         |           | 0.6425  |
| EDRN 108          | A-Adenoma |      |         |         |       | 0.6443  |           | 0.6561  |
| EDRN 109          | Adenomas  |      |         |         |       | 0.0617  |           | 0.8322  |
| EDRN 110          | Adenomas  |      | 1.7098  | -0.7008 |       | 1.3083  |           | -0.2872 |
| EDRN 111          | Adenomas  |      |         | -0.8803 |       | 1.1357  |           | 0.6267  |
| EDRN 112          | Adenomas  |      |         | 1.6561  |       | -0.2871 |           | -2.5606 |

| Sample ID         | Status    | IL1B | IL6ST   | ITGA2   | KDM5D | KIF20A  | LOC441347 | LYPD1   |
|-------------------|-----------|------|---------|---------|-------|---------|-----------|---------|
| Confirmed in EDRN |           | v    |         |         |       |         |           |         |
| EDRN 113          | Sv normal |      |         | -0.7777 |       | 0.2482  |           | 0.0036  |
| EDRN 114          | Sv normal |      | -0.3672 | -2.0822 |       | 1.6044  |           | 0.2952  |
| EDRN 115          | Sv normal |      | -0.2558 | -0.6535 |       | 0.5381  |           | 0.0708  |
| EDRN 116          | Sv normal |      | -0.0583 | -1.2851 |       | 0.0563  |           | -0.0560 |
| EDRN 117          | Sc normal |      | 1.2150  | -0.9826 |       | 0.3597  |           | 0.5350  |
| EDRN 118          | Sc normal |      | 0.0915  | -0.9137 |       | 0.4705  |           | 0.5380  |
| EDRN 119          | Sc normal |      | -0.2643 | -0.9412 |       | -0.2485 |           | -0.0424 |
| EDRN 120          | Sc normal |      | -0.6263 |         |       | 0.3802  |           | 0.0508  |
| EDRN 121          | Early CRC |      | -0.0581 |         |       | 0.7168  |           | 1.0939  |
| EDRN 122          | Early CRC |      | 0.4996  | -0.3164 |       | 0.4646  |           | -0.3906 |
| EDRN 123          | Early CRC |      |         | -0.0783 |       | 0.3020  |           | 0.0880  |
| EDRN 124          | Early CRC |      |         | -1.7007 |       | 1.3114  |           | 0.2313  |
| EDRN 125          | Late CRC  |      | 1.0636  |         |       | 0.3342  |           | 0.3495  |
| EDRN 126          | Late CRC  |      | 0.3760  |         |       | 0.7993  |           | -0.1793 |
| EDRN 127          | Late CRC  |      | 0.7809  | -1.3401 |       | 0.7376  |           | 0.1449  |
| EDRN 128          | Late CRC  |      | 0.8127  | -1.5646 |       | 1.2843  |           | 0.3543  |
| EDRN 129          | A-Adenoma |      | 1.4383  | -1.4548 |       | 1.0173  |           | 1.1749  |
| EDRN 130          | A-Adenoma |      | 0.0299  |         |       | 0.4585  |           | 0.2728  |
| EDRN 131          | A-Adenoma |      | -0.1408 |         |       | 0.9466  |           | 0.7081  |
| EDRN 132          | A-Adenoma |      | 2.0784  |         |       | 0.7403  |           | 0.6474  |
| EDRN 133          | Adenomas  |      | -0.9015 | -1.5991 |       |         |           | 0.3847  |
| EDRN 134          | Adenomas  |      |         | -0.8149 |       |         |           | 0.4134  |
| EDRN 135          | Adenomas  |      |         | -1.8823 |       |         |           | 0.3924  |
| EDRN 136          | Adenomas  |      |         | 0.0370  |       |         |           | 0.6594  |
| EDRN 137          | Sv normal |      |         |         |       |         |           | 0.2494  |
| EDRN 138          | Sv normal |      |         | -0.1634 |       | -0.2481 |           | 0.1002  |
| EDRN 139          | Sv normal |      |         |         |       |         |           | 0.2698  |
| EDRN 140          | Sv normal |      |         |         |       |         |           | 0.5868  |
| EDRN 141          | Sc normal |      | -0.1665 | -1.0035 |       |         |           | -0.0129 |
| EDRN 142          | Sc normal |      |         | 0.3166  |       | 0.2557  |           | -0.4790 |
| EDRN 143          | Sc normal |      | -0.8547 | -0.3546 |       | 1.0823  |           | -0.2010 |
| EDRN 144          | Sc normal |      | 1.1855  |         |       |         |           | 0.0659  |
| EDRN 145          | Early CRC |      |         | -0.8088 |       | 1.9805  |           | 0.9464  |
| EDRN 146          | Early CRC |      | 2.4488  |         |       | 0.7102  |           | 0.6296  |
| EDRN 147          | Early CRC |      |         | -2.9536 |       | 2.6013  |           | 0.9098  |
| EDRN 148          | Early CRC |      |         |         |       | 1.3856  |           | 0.9516  |
| EDRN 149          | Late CRC  |      |         | -2.5555 |       | 1.3064  |           | 0.3416  |
| EDRN 150          | Late CRC  |      |         | -3.3505 |       | 0.3524  |           | 0.9736  |
| EDRN 151          | Late CRC  |      |         |         |       |         |           | 0.7821  |
| EDRN 152          | Late CRC  |      |         |         |       |         |           | 0.6458  |
| EDRN 153          | A-Adenoma |      |         | 0.1801  |       | -0.3224 |           | -0.6957 |
| EDRN 154          | A-Adenoma |      | 0.2538  |         |       | 0.7610  |           | 0.5186  |
| EDRN 155          | A-Adenoma |      |         |         |       | 0.6848  |           | 0.5099  |
| EDRN 156          | A-Adenoma |      |         |         |       |         |           | 0.6370  |
| EDRN 157          | Adenomas  |      | 0.1652  | -0.6505 |       | 1.3810  |           | 0.4805  |

| Sample ID         | Status    | IL1B | IL6ST   | ITGA2   | KDM5D | KIF20A  | LOC441347 | LYPD1   |
|-------------------|-----------|------|---------|---------|-------|---------|-----------|---------|
| Confirmed in EDRN |           | v    |         |         |       |         |           |         |
| EDRN 158          | Adenomas  |      | -2.3677 |         |       | 1.2956  |           | 0.5175  |
| EDRN 159          | Adenomas  |      | 0.4530  | -0.0793 |       | 0.2310  |           | -0.1586 |
| EDRN 160          | Adenomas  |      |         | 0.4632  |       | 0.8794  |           | -0.0462 |
| EDRN 161          | Sv normal |      | 0.8204  | 0.8257  |       | -0.3764 |           | -0.3125 |
| EDRN 162          | Sv normal |      | -1.5256 | -0.7371 |       | -1.8352 |           | -0.3216 |
| EDRN 163          | Sv normal |      | 0.0396  | 0.4098  |       | -0.2825 |           | -0.3786 |
| EDRN 164          | Sv normal |      | -0.4647 |         |       | -0.0211 |           | -0.1232 |
| EDRN 165          | Sc normal |      |         | 0.2454  |       | 0.5672  |           | -0.2925 |
| EDRN 166          | Sc normal |      |         | -0.6523 |       | -0.5245 |           | 0.1166  |
| EDRN 167          | Sc normal |      |         | -1.2885 |       | 0.8135  |           | 0.0672  |
| EDRN 168          | Sc normal |      | 2.6963  | -0.9195 |       | 1.3488  |           | 0.2252  |
| EDRN 169          | Early CRC |      | 2.1362  | -2.5079 |       | 2.1018  |           | 1.0648  |
| EDRN 170          | Early CRC |      |         | -1.9719 |       |         |           | 0.1419  |
| EDRN 171          | Late CRC  |      |         |         |       | 0.6749  |           | 0.1676  |
| EDRN 172          | Late CRC  |      |         |         |       | 0.9215  |           | 0.8162  |
| EDRN 173          | A-Adenoma |      | -1.6077 | -1.7779 |       | 1.2056  |           | 0.9209  |
| EDRN 174          | A-Adenoma |      |         | -0.5173 |       | 0.4005  |           | 0.1062  |
| EDRN 175          | Adenomas  |      |         | 1.0830  |       |         |           | 0.6885  |
| EDRN 176          | Adenomas  |      |         |         |       | 0.1167  |           | 0.3000  |
| EDRN 177          | Sv normal |      |         |         |       |         |           | 0.9107  |
| EDRN 178          | Sv normal |      | 0.5543  | 0.7106  |       |         |           | 0.4717  |
| EDRN 179          | Sc normal |      |         |         |       | -0.5179 |           | -2.2309 |
| EDRN 180          | Sc normal |      |         | -0.9780 |       |         |           | 0.1044  |



| Sample ID         | Status  | MAPK1   | MARCKSL1 | MDM2    | MLL3     | MSMB     | NAIP     | NAT1   |
|-------------------|---------|---------|----------|---------|----------|----------|----------|--------|
| Confirmed in EDRN |         | v       |          |         |          | v        | v        |        |
| CHS 1             | Control | 2.8245  | -1.2817  | -0.1912 | -8.8398  | -7.0939  | -11.2116 | 8.9752 |
| CHS 2             | Cancer  | 2.5435  | -3.2012  | -1.5285 | -10.2660 | -8.7731  | -12.2287 | 6.8007 |
| CHS 3             | Cancer  | 2.0951  | -2.7699  | -1.4827 | -8.9595  | -9.6050  | -11.6160 | 8.4933 |
| CHS 4             | Control | 1.8366  | -2.3141  | -2.6403 | -10.5460 | -10.4729 | -12.8818 | 6.9678 |
| CHS 5             | Control | 2.4226  | -1.9535  | -1.6213 | -10.1252 | -9.6186  | -13.2311 | 7.7634 |
| CHS 6             | Cancer  | 2.8695  | -2.4541  | -0.4684 | -9.3257  | -9.0091  | -12.5440 | 5.7317 |
| CHS 7             | Control | 1.6200  | -3.1514  | -1.5038 | -8.5452  | -9.8812  | -13.9015 | 6.0303 |
| CHS 8             | Cancer  | 1.8784  | -2.8619  | -1.7434 | -8.1545  | -9.2278  | -14.1300 | 6.2345 |
| CHS 9             | Cancer  | 3.0907  | -1.3189  | -0.6366 | -7.9442  | -9.1311  | -11.6227 | 7.5840 |
| CHS 10            | Control | 3.2395  | -1.2954  | -0.7520 | -8.0220  | -9.0892  | -11.5730 | 8.0987 |
| CHS 11            | Control | 0.2388  | -4.6423  | -2.8390 | -11.3438 | -11.1701 | -13.7616 | 5.7150 |
| CHS 12            | Cancer  | 3.2962  | -2.3500  | -1.3286 | -7.7592  | -8.1025  | -11.8311 | 9.3361 |
| CHS 13            | Cancer  | 2.5259  | -0.8460  | -1.3696 | -7.8307  | -6.8423  | -11.1074 | 8.4049 |
| CHS 14            | Control | 2.2057  | -2.4966  | -0.7808 | -8.4006  | -7.6233  | -11.1523 | 7.3611 |
| CHS 15            | Control | 2.2834  | -2.2827  | -1.6189 | -8.6393  | -9.0621  | -12.3374 | 6.8898 |
| CHS 16            | Cancer  | 2.6659  | -2.1501  | -1.0465 | -7.8143  | -9.3149  | -11.3864 | 5.8503 |
| CHS 17            | Cancer  | 1.8212  | -0.2347  | -1.7745 | -7.7817  | -7.5773  | -12.8247 | 5.4402 |
| CHS 18            | Control | 2.1655  | -1.7116  | -2.5414 | -8.8940  | -7.5046  | -13.0737 | 8.7010 |
| CHS 19            | Cancer  | 2.8080  | -1.7978  | -1.3779 | -9.3008  | -8.7942  | -12.5186 | 7.5639 |
| CHS 20            | Control | -0.4360 | -4.4641  | -3.1673 | -9.9279  | -11.3122 | -12.8289 | 5.6617 |
| CHS 21            | Cancer  | 1.8685  | -2.2352  | -2.7057 | -7.2684  | -8.0321  | -10.6352 | 6.2198 |
| CHS 22            | Control | 1.5959  | -4.3402  | -2.0724 | -9.7246  | -10.9330 | -13.6004 | 6.3164 |
| CHS 23            | Cancer  | 2.4318  | 0.0645   | -2.0721 | -7.6042  | -8.0084  | -10.6825 | 8.0775 |
| CHS 24            | Control | -2.3757 | -6.7323  | -7.1372 | -10.8304 | -10.7640 | -13.3314 | 4.6378 |
| CHS 25            | Cancer  | 2.1404  | -3.3782  | -1.7127 | -8.3976  | -9.8847  | -11.6261 | 6.9931 |
| CHS 26            | Control | 1.6934  | -2.4403  | -2.2813 | -8.1671  | -9.1861  | -10.8388 | 7.7332 |
| CHS 27            | Cancer  | 2.3199  | -2.3014  | -1.9441 | -7.7159  | -9.6325  | -12.2516 | 7.6270 |
| CHS 28            | Control | 1.3232  | -1.1333  | -0.3103 | -8.4364  | -7.8229  | -11.2266 | 7.3834 |
| CHS 29            | Cancer  | 1.6416  | -2.2340  | -2.0215 | -8.3732  | -8.5808  | -11.3227 | 8.2167 |
| CHS 30            | Control | 2.4300  | -3.1361  | -2.6413 | -9.3575  | -9.0216  | -13.3205 | 8.5436 |
| CHS 31            | Control | 1.6282  | -1.9972  | -0.9445 | -8.2734  | -8.8950  | -11.7383 | 5.5873 |
| CHS 32            | Cancer  | 1.3395  | -1.8100  | -2.2425 | -9.6340  | -8.6409  | -13.7519 | 6.9258 |
| CHS 33            | Cancer  | 1.7227  | -1.3135  | -1.8670 | -8.1024  | -9.9975  | -11.6841 | 7.9865 |
| CHS 34            | Control | 1.5816  | -1.1860  | -2.5865 | -9.2643  | -9.4927  | -12.5659 | 5.1282 |
| CHS 35            | Control | 1.7952  | -2.7014  | -1.9765 | -9.6684  | -9.4352  | -12.5466 | 7.2420 |
| CHS 36            | Cancer  | 2.0786  | -2.9878  | -2.0124 | -8.9887  | -9.0294  | -12.1801 | 6.8123 |
| CHS 37            | Cancer  | 2.6900  | -3.5428  | -1.7083 | -9.6213  | -9.1194  | -11.7369 | 6.6139 |
| CHS 38            | Control | 2.1238  | -3.3707  | -2.1427 | -9.3079  | -9.5429  | -12.5360 | 6.3461 |
| CHS 39            | Control | 0.4594  | -3.3855  | -3.2247 | -9.9888  | -8.8983  | -12.7625 | 6.5485 |
| CHS 40            | Cancer  | 2.2565  | -2.2425  | -1.1422 | -9.1614  | -9.3359  | -12.4056 | 8.2663 |
| CHS 41            | Control | 1.2691  | -2.6132  | -2.5864 | -8.8385  | -9.0210  | -12.8857 | 6.3673 |
| CHS 42            | Cancer  | 2.5368  | -2.7770  | -2.0879 | -9.3797  | -9.8165  | -13.2740 | 6.9883 |
| CHS 43            | Control | 1.4635  | -1.5958  | -1.1834 | -9.3885  | -9.0841  | -13.0547 | 6.3740 |
| CHS 44            | Cancer  | 2.3353  | -2.7376  | -2.0014 | -8.7388  | -9.1233  | -12.5989 | 7.4916 |
| CHS 45            | Control | 2.5566  | -2.6607  | -1.6326 | -9.0547  | -9.2788  | -12.3599 | 6.3673 |

| Sample ID         | Status  | MAPK1   | MARCKSL1 | MDM2    | MLL3     | MSMB     | NAIP     | NAT1   |
|-------------------|---------|---------|----------|---------|----------|----------|----------|--------|
| Confirmed in EDRN |         | v       |          |         |          | v        | v        |        |
| CHS 46            | Cancer  | 2.8411  | -1.7353  | -1.2358 | -8.1238  | -7.7231  | -11.8080 | 7.5342 |
| CHS 47            | Cancer  | 2.8102  | -2.6014  | -1.4491 | -9.3115  | -7.3890  | -13.0197 | 7.0957 |
| CHS 48            | Control | 2.4791  | -2.9395  | -1.4651 | -8.5540  | -8.9912  | -12.5166 | 6.6826 |
| CHS 49            | Cancer  | 1.4860  | -3.3993  | -1.8067 | -8.7728  | -9.6206  | -11.7187 | 7.8396 |
| CHS 50            | Control | 2.3127  | -2.6270  | -2.0156 | -9.2737  | -9.1351  | -11.3457 | 6.8911 |
| CHS 51            | Cancer  | 2.4449  | -2.7893  | -1.7834 | -9.2739  | -9.3285  | -12.3940 | 8.3139 |
| CHS 52            | Control | 2.5439  | -2.9947  | -2.4265 | -9.1530  | -9.6013  | -12.7603 | 6.3111 |
| CHS 53            | Control | 2.0448  | -2.4239  | -1.8300 | -8.1183  | -8.6625  | -12.8004 | 6.5165 |
| CHS 54            | Cancer  | 2.6936  | -2.2613  | -1.3984 | -8.6033  | -8.2733  | -11.7723 | 7.7355 |
| CHS 55            | Cancer  | 2.4965  | -2.7353  | -2.2622 | -9.1723  | -9.6807  | -12.5637 | 8.1354 |
| CHS 56            | Control | 3.3058  | -2.7392  | -1.2677 | -8.4133  | -9.9172  | -11.3367 | 8.4949 |
| CHS 57            | Control | 1.1841  | -2.1680  | -2.1510 | -9.5822  | -8.9156  | -11.9761 | 6.9325 |
| CHS 58            | Cancer  | 2.5316  | -2.2425  | -1.7333 | -8.3652  | -9.1249  | -12.9947 | 7.2741 |
| CHS 59            | Cancer  | 1.3459  | -2.1556  | -2.2676 | -8.6850  | -9.5370  | -13.2247 | 6.0822 |
| CHS 60            | Control | 1.2946  | -2.4448  | -1.7864 | -8.8246  | -10.0658 | -12.8254 | 6.7343 |
| CHS 61            | Cancer  | 2.6000  | -3.5329  | -1.1707 | -9.2358  | -8.6828  | -12.7836 | 6.1572 |
| CHS 62            | Control | -0.8274 | -2.5967  | -3.6209 | -9.6895  | -10.1198 | -13.6405 | 6.4068 |
| CHS 63            | Cancer  | 2.5000  | -2.2103  | -0.8743 | -8.6114  | -7.0926  | -12.1178 | 7.2651 |
| CHS 64            | Control | 1.7263  | -3.1309  | -2.5941 | -9.8576  | -9.1502  | -12.7956 | 5.6634 |
| CHS 65            | Cancer  | 2.2051  | -1.4237  | -0.8024 | -7.5619  | -8.7668  | -11.2856 | 6.9587 |
| CHS 66            | Control | 2.1177  | 0.1778   | -0.6075 | -7.6871  | -7.3887  | -11.1835 | 6.1629 |
| CHS 67            | Control | 0.0286  | -3.1668  | -3.9294 | -10.2980 | -10.5596 | -12.3969 | 5.5666 |
| CHS 68            | Cancer  | 1.5574  | -1.9604  | -2.1137 | -9.5711  | -8.9109  | -12.2199 | 6.5606 |
| CHS 69            | Cancer  | 2.6401  | -1.9159  | -1.4821 | -9.0195  | -8.3211  | -12.0555 | 7.4648 |
| CHS 70            | Control | 2.4205  | -2.8439  | -0.8923 | -8.8672  | -8.2539  | -12.2728 | 7.3719 |
| CHS 71            | Cancer  | 1.9801  | -2.8146  | -1.0415 | -8.4274  | -9.3794  | -12.1733 | 7.8237 |
| CHS 72            | Control | 2.8831  | -2.4220  | -2.5423 | -8.7836  | -8.4545  | -13.3742 | 8.1923 |
| CHS 73            | Control | 2.0756  | -4.3397  | -2.6382 | -9.8074  | -10.9053 | -15.1788 | 5.8734 |
| CHS 74            | Cancer  | 1.9196  | -1.8878  | -0.9813 | -7.9384  | -8.7972  | -10.8966 | 7.2860 |
| CHS 75            | Cancer  | 0.8397  | -2.2036  | -0.0495 | -8.0783  | -7.7104  | -10.7528 | 7.4424 |
| CHS 76            | Control | 2.3689  | -3.5944  | -3.2573 | -9.5723  | -8.8412  | -11.7159 | 7.7652 |
| CHS 77            | Control | 1.4034  | -3.6748  | -2.9973 | -9.1462  | -10.1024 | -12.4492 | 6.8349 |
| CHS 78            | Cancer  | 1.9761  | -2.5114  | -0.9865 | -7.9882  | -8.2069  | -11.2054 | 7.3493 |
| CHS 79            | Cancer  | 2.2913  | -0.7195  | -0.2043 | -8.3388  | -7.8726  | -11.4495 | 7.1749 |
| CHS 80            | Control | 2.0225  | -1.5995  | -0.9356 | -8.7416  | -7.7361  | -11.5241 | 6.8097 |
| CHS 81            | Control | 2.0551  | -2.4665  | -1.2211 | -9.4853  | -9.3639  | -12.4666 | 6.5829 |
| CHS 82            | Cancer  | 3.3252  | -2.6802  | -1.0745 | -8.7380  | -8.7107  | -12.7449 | 7.9112 |
| CHS 83            | Cancer  | 2.7176  | -1.8398  | -2.2219 | -8.3344  | -8.1059  | -11.9740 | 7.5270 |
| CHS 84            | Control | 2.5982  | -2.0990  | -1.4247 | -9.8583  | -9.2452  | -12.0884 | 6.9534 |
| CHS 85            | Cancer  | 1.5261  | -2.6427  | -2.3684 | -8.3913  | -9.7977  | -12.5983 | 6.9937 |
| CHS 86            | Control | 1.5105  | -2.7461  | -2.9184 | -9.4619  | -10.5617 | -13.1402 | 6.8432 |
| CHS 87            | Control | 1.7581  | -2.9544  | -1.9771 | -9.3901  | -9.7118  | -12.4342 | 5.8378 |
| CHS 88            | Cancer  | 2.0861  | -2.4059  | -2.6666 | -9.4872  | -8.9547  | -13.4343 | 7.2673 |
| CHS 89            | Control | 2.5113  | -3.2363  | -1.7893 | -8.5170  | -9.1325  | -12.1308 | 7.0328 |
| CHS 90            | Cancer  | 2.1787  | -1.5376  | -1.5359 | -8.8038  | -8.9350  | -12.1844 | 7.4010 |

| Sample ID Status  | MAPK1   | MARCKSL1 | MDM2    | MLL3     | MSMB     | NAIP     | NAT1   |
|-------------------|---------|----------|---------|----------|----------|----------|--------|
| Confirmed in EDRN | v       |          |         |          | v        | v        |        |
| CHS 91 Cancer     | 1.4522  | -2.4324  | -1.6604 | -8.6217  | -8.4310  | -13.0158 | 6.9263 |
| CHS 92 Control    | 1.6111  | -2.7165  | -1.6331 | -8.8565  | -9.7707  | -13.2466 | 7.0556 |
| CHS 93 Control    | 2.4361  | -2.6065  | -3.0859 | -10.5785 | -9.8065  | -12.3643 | 6.5092 |
| CHS 94 Cancer     | 1.8276  | -1.9795  | -2.7680 | -9.2504  | -8.3331  | -12.2910 | 7.1462 |
| CHS 95 Control    | 1.6842  | -2.3652  | -1.5397 | -8.1774  | -9.4057  | -12.1527 | 7.1768 |
| CHS 96 Cancer     | 1.3407  | -1.5821  | -2.4651 | -8.2849  | -8.5048  | -12.5731 | 7.1549 |
| CHS 97 Cancer     | 1.9903  | -2.0596  | -2.3279 | -9.2104  | -8.5797  | -11.9558 | 6.1088 |
| CHS 98 Control    | 1.9688  | -5.3311  | -3.0598 | -12.7042 | -9.9301  | -13.4954 | 6.2411 |
| CHS 99 Cancer     | 2.1219  | -2.5461  | -1.5058 | -9.4358  | -8.3922  | -11.9992 | 7.2445 |
| CHS 100 Control   | 3.3107  | -2.9537  | -1.7793 | -9.0558  | -9.2430  | -12.4507 | 7.4213 |
| CHS 101 Cancer    | 2.2570  | -1.6392  | -1.4048 | -8.0760  | -7.7482  | -11.5010 | 7.4317 |
| CHS 102 Control   | 1.8693  | -1.8507  | -1.7736 | -6.9577  | -7.4025  | -11.0053 | 7.1282 |
| CHS 103 Cancer    | 1.7817  | -1.6010  | -0.5173 | -8.5313  | -8.4619  | -12.0726 | 7.1280 |
| CHS 104 Control   | 1.3238  | -2.8274  | -1.6334 | -9.3639  | -9.2777  | -13.5711 | 6.8116 |
| CHS 105 Cancer    | 1.6760  | -2.1479  | -1.7354 | -8.3151  | -7.6467  | -12.2721 | 7.0647 |
| CHS 106 Control   | 2.5972  | -3.3722  | -3.2092 | -9.7327  | -9.1523  | -13.8868 | 6.6912 |
| CHS 107 Cancer    | 1.7217  | -3.3927  | -0.8124 | -9.0287  | -9.2066  | -12.5268 | 7.3455 |
| CHS 108 Control   | 2.1197  | -1.3535  | -1.7048 | -8.7112  | -9.3255  | -11.9934 | 6.5960 |
| CHS 109 Control   | 1.9464  | -2.8103  | -3.2521 | -9.2502  | -8.8242  | -12.6857 | 6.9796 |
| CHS 110 Cancer    | 1.3943  | -2.9782  | -2.4699 | -9.5353  | -9.0606  | -13.3200 | 6.3872 |
| CHS 111 Control   | 1.5122  | -2.7148  | -2.7274 | -8.9228  | -10.2350 | -13.0435 | 6.9222 |
| CHS 112 Cancer    | 2.6630  | -2.4806  | -0.8157 | -8.9991  | -9.0693  | -11.6939 | 7.3983 |
| CHS 113 Control   | 1.9732  | -1.6820  | -1.0373 | -8.2147  | -9.2736  | -11.0394 | 8.2946 |
| CHS 114 Cancer    | 2.4476  | -2.1827  | -1.8740 | -8.8217  | -10.1470 | -11.5437 | 7.9425 |
| CHS 117 Control   | 1.3775  | -2.0955  | -2.2051 | -9.3891  | -9.8968  | -12.4751 | 6.1372 |
| CHS 118 Cancer    | 1.4503  | -2.3428  | -2.0978 | -7.7508  | -9.7760  | -12.4156 | 7.2135 |
| CHS 119 Cancer    | 1.7295  | -1.7198  | -1.4382 | -7.6427  | -9.1901  | -12.2398 | 7.5709 |
| CHS 120 Control   | 2.3241  | -1.8376  | -1.3188 | -8.3782  | -9.0250  | -12.1574 | 6.7252 |
| CHS 121 Control   | 1.2421  | -2.8327  | -1.9334 | -9.1925  | -9.5582  | -12.4956 | 5.8275 |
| CHS 122 Cancer    | 2.3677  | -2.7655  | -2.3470 | -8.3218  | -10.0171 | -12.0034 | 7.5134 |
| CHS 123 Cancer    | 2.5719  | -2.1136  | -1.8211 | -8.4541  | -8.5134  | -11.7843 | 7.3109 |
| CHS 124 Control   | 2.5816  | -1.8954  | -1.5605 | -8.0751  | -8.7761  | -12.6386 | 6.8682 |
| CHS 125 Cancer    | 1.4330  | -2.5462  | -2.2650 | -9.3136  | -8.7231  | -12.2485 | 7.0452 |
| CHS 126 Control   | 1.8700  | -1.7938  | -1.0935 | -8.5846  | -8.8153  | -12.5549 | 7.0765 |
| CHS 127 Cancer    | 3.0147  | -1.9478  | 1.0715  | -8.6079  | -8.4462  | -8.1540  | 6.7664 |
| CHS 128 Control   | -0.5627 | -3.2158  | -3.6453 | -10.5417 | -10.9244 | -13.2534 | 5.8131 |
| CHS 129 Control   | 1.2747  | -3.7938  | -2.6765 | -11.1262 | -10.9935 | -14.4859 | 6.1057 |
| CHS 130 Cancer    | 1.7327  | -4.6331  | -2.6158 | -10.3433 | -10.3327 | -13.9206 | 6.8474 |
| CHS 131 Cancer    | 2.4513  | -1.3739  | -1.8622 | -8.6443  | -8.0460  | -12.5039 | 7.2534 |
| CHS 132 Control   | 3.0559  | -1.4651  | -1.6940 | -8.2283  | -7.8649  | -11.4354 | 7.4151 |
| CHS 133 Cancer    | 1.0338  | -4.3992  | -2.9226 | -10.9628 | -11.2624 | -14.1836 | 5.7998 |
| CHS 134 Control   | 2.1892  | -2.8262  | -2.7936 | -9.9878  | -9.7956  | -13.5528 | 6.7166 |
| CHS 135 Cancer    | 2.0194  | -1.6178  | -1.5942 | -8.1975  | -9.3531  | -11.5256 | 7.7136 |
| CHS 136 Control   | 2.4685  | -2.3852  | -0.8779 | -8.0672  | -8.3049  | -11.9934 | 7.4344 |
| CHS 137 Cancer    | 2.2250  | -3.0617  | -1.7174 | -8.6461  | -8.3946  | -12.4908 | 6.8186 |

| Sample ID         | Status    | MAPK1   | MARCKSL1 | MDM2    | MLL3     | MSMB     | NAIP     | NAT1   |
|-------------------|-----------|---------|----------|---------|----------|----------|----------|--------|
| Confirmed in EDRN |           | v       |          |         |          | v        | v        |        |
| CHS 138           | Control   | 2.0909  | -2.7160  | -1.7315 | -8.7476  | -8.8074  | -12.2597 | 7.3390 |
| CHS 139           | Cancer    | 2.3789  | -0.4205  | -1.4635 | -7.7607  | -7.7124  | -11.8583 | 7.3571 |
| CHS 140           | Control   | 2.0940  | -2.2748  | -1.5361 | -8.1308  | -8.1494  | -11.8424 | 7.6743 |
| CHS 141           | Cancer    | 1.6259  | -2.2443  | -1.4346 | -8.5935  | -7.9232  | -11.6465 | 7.7662 |
| CHS 142           | Control   | 2.1153  | -3.0558  | -1.6989 | -9.0538  | -9.2330  | -12.5587 | 7.7671 |
| CHS 143           | Cancer    | 1.7923  | -1.9214  | -2.0803 | -8.5892  | -9.2400  | -12.4772 | 7.0828 |
| CHS 144           | Control   | 2.4495  | -1.5214  | -2.1068 | -7.6774  | -7.7555  | -12.1445 | 7.5428 |
| CHS 145           | Cancer    | 2.5824  | -2.4040  | -2.0108 | -8.2197  | -9.4081  | -13.3521 | 7.3172 |
| CHS 146           | Control   | 2.5916  | -2.2174  | -2.0008 | -9.5980  | -9.9778  | -14.2303 | 7.5610 |
| CHS 147           | Cancer    | 1.7627  | -1.8709  | -1.5379 | -8.7998  | -6.9258  | -11.7627 | 7.7497 |
| CHS 148           | Control   | 2.3403  | -1.9573  | -1.5893 | -8.3071  | -8.6594  | -11.3676 | 7.1189 |
| CHS 149           | Control   | 2.3497  | -3.2716  | -2.3787 | -10.2619 | -9.5239  | -12.6594 | 8.1543 |
| CHS 150           | Cancer    | 2.1182  | -1.6454  | -2.1655 | -7.7064  | -8.6791  | -10.3604 | 6.6841 |
| CHS 151           | Control   | 1.3664  | -2.8552  | -1.9109 | -10.2481 | -8.8351  | -12.0855 | 6.6334 |
| CHS 152           | Cancer    | 1.7297  | -1.7550  | -1.6903 | -8.8943  | -9.4201  | -12.6801 | 7.0484 |
| CHS 153           | Control   | 1.6516  | -3.7738  | -2.4028 | -9.2148  | -9.5605  | -13.2358 | 5.8311 |
| CHS 154           | Cancer    | 2.2785  | -2.3677  | -1.8075 | -9.5360  | -8.0403  | -11.3910 | 7.2561 |
| CHS 155           | Cancer    | 1.9446  | -1.3149  | -1.2284 | -8.2610  | -8.1065  | -12.0671 | 7.5511 |
| CHS 156           | Control   | 1.6112  | -2.7370  | -1.9744 | -8.5083  | -8.6296  | -12.4818 | 6.9312 |
| CHS 157           | Cancer    | 1.5447  | -4.0726  | -2.1990 | -9.2971  | -10.7583 | -12.8960 | 6.3719 |
| CHS 158           | Control   | 1.9505  | -2.3933  | -1.4111 | -9.2410  | -9.3988  | -12.4934 | 6.6889 |
| CHS 159           | Cancer    | 1.9820  | -2.2740  | -1.4564 | -7.8404  | -8.9043  | -12.1669 | 6.9163 |
| CHS 160           | Control   | 1.8730  | -2.3039  | -1.8362 | -8.6311  | -9.8008  | -12.1113 | 6.7564 |
| EDRN 1            | Early CRC | 1.9444  | 0.1750   |         | 0.3059   |          | -1.9216  |        |
| EDRN 2            | Early CRC |         | -0.5099  |         | 0.6843   |          | -0.8716  |        |
| EDRN 3            | Early CRC |         | 0.1385   |         | 0.4414   | 0.5719   | -0.5061  |        |
| EDRN 4            | Early CRC |         | 1.5007   |         | 0.4262   | -0.2477  | 1.5420   |        |
| EDRN 5            | Late CRC  | 0.9660  | 1.7715   |         | 0.5181   | -0.2779  | 0.3905   |        |
| EDRN 6            | Late CRC  | 1.0541  | 0.2031   |         | 0.6314   | 0.2732   | 0.1329   |        |
| EDRN 7            | Late CRC  |         | 0.7108   |         | 0.2498   | 0.0966   | 0.6800   |        |
| EDRN 8            | Late CRC  | 0.8987  | 0.7731   |         | -0.1255  | -1.1145  | -0.2461  |        |
| EDRN 9            | A-Adenoma |         | -0.3396  |         | 0.5982   | 0.4978   |          |        |
| EDRN 10           | A-Adenoma |         | -0.1489  |         | 0.3233   | 0.7257   | 0.4639   |        |
| EDRN 11           | A-Adenoma | 0.9417  | 1.3370   |         | 0.0821   | -0.7594  | 0.5682   |        |
| EDRN 12           | A-Adenoma | 1.5562  | 1.0890   |         | 0.5481   | 0.9546   | 0.8676   |        |
| EDRN 13           | Adenomas  | -0.0399 | 0.6197   |         | -0.0763  |          |          |        |
| EDRN 14           | Adenomas  | 0.2033  | 0.7348   |         | 0.2380   | 0.4386   | 0.9782   |        |
| EDRN 15           | Adenomas  | -0.1948 | 0.4479   |         | 0.0591   | 1.2379   | -0.6746  |        |
| EDRN 16           | Adenomas  | 1.6631  | -0.5097  |         | 0.5874   | -0.5274  | 0.8831   |        |
| EDRN 17           | Sv normal | 0.0531  | -0.6594  |         | 0.1938   | 1.2834   | 0.2748   |        |
| EDRN 18           | Sv normal | 1.0888  | 0.6414   |         | 0.5307   | 0.6519   | -0.0652  |        |
| EDRN 19           | Sv normal | -0.0615 | -1.7009  |         | 0.0767   | 0.7498   | 0.7508   |        |
| EDRN 20           | Sv normal | 1.4440  | 0.8945   |         | 0.3197   |          | -0.0655  |        |
| EDRN 21           | Sc normal | 0.4648  | 0.6712   |         | 0.4672   | -0.7983  | 0.6695   |        |
| EDRN 22           | Sc normal | 1.7621  | 0.9079   |         | 0.2080   | -0.2719  | 0.3647   |        |

| Sample ID         | Status    | MAPK1   | MARCKSL1 | MDM2 | MLL3    | MSMB    | NAIP    | NAT1 |
|-------------------|-----------|---------|----------|------|---------|---------|---------|------|
| Confirmed in EDRN |           | v       |          |      |         | v       | v       |      |
| EDRN 23           | Sc normal | 0.7982  | 0.3222   |      | 0.2557  | -0.6225 | 1.1557  |      |
| EDRN 24           | Sc normal | -0.9102 | 1.0546   |      | 0.3018  | 0.5442  | 0.6430  |      |
| EDRN 25           | Early CRC | -0.7516 | 0.7875   |      | 0.9849  | 0.8673  | -0.1472 |      |
| EDRN 26           | Early CRC | 0.0574  | 0.3743   |      | 0.5218  | 0.8136  | 1.0689  |      |
| EDRN 27           | Early CRC | 0.7025  | -0.0681  |      | 0.0141  | 0.3071  | 0.4045  |      |
| EDRN 28           | Early CRC | 1.6852  | -0.2990  |      | 0.5777  | 1.5467  | 0.7565  |      |
| EDRN 29           | Late CRC  | 1.6585  | 0.6043   |      | 0.1637  | -0.0384 | 1.1961  |      |
| EDRN 30           | Late CRC  | 1.8537  | -0.3376  |      |         | 0.8346  | -0.8422 |      |
| EDRN 31           | Late CRC  |         | -0.0149  |      | 0.6108  | -0.2747 | -1.3223 |      |
| EDRN 32           | Late CRC  | -0.6447 | -0.2035  |      | 0.4103  | 0.5146  | 1.4506  |      |
| EDRN 33           | A-Adenoma |         | 0.4164   |      | 0.3298  | 0.1294  | 0.4901  |      |
| EDRN 34           | A-Adenoma | -0.0617 | 1.1700   |      | 0.7861  | 0.6224  | 0.7650  |      |
| EDRN 35           | A-Adenoma | 2.3165  | 1.1840   |      | 0.4135  | -0.1682 | -1.1171 |      |
| EDRN 36           | A-Adenoma | 2.5604  | 1.2684   |      | 0.7210  | 2.1308  | -0.1031 |      |
| EDRN 37           | Adenomas  |         | 0.4582   |      | 0.8928  | -0.1326 | 0.8156  |      |
| EDRN 38           | Adenomas  |         | 0.8229   |      | 0.1791  |         | 3.6969  |      |
| EDRN 39           | Adenomas  |         | 1.1086   |      | 0.1380  | 0.9319  | 1.1189  |      |
| EDRN 40           | Adenomas  |         | -1.5573  |      | -1.3783 | -3.6074 | -0.7926 |      |
| EDRN 41           | Sv normal |         | 1.1044   |      | 0.0323  | -0.0174 | 1.5110  |      |
| EDRN 42           | Sv normal |         | 0.3349   |      | -0.0765 |         | 1.3990  |      |
| EDRN 43           | Sv normal |         | 0.4555   |      | 0.7280  | 0.9461  | 0.6463  |      |
| EDRN 44           | Sv normal | 0.5189  | -0.1840  |      | 0.9433  | 0.3882  | -0.4487 |      |
| EDRN 45           | Sc normal | 1.6874  | 1.0672   |      | 0.3905  | 0.6357  | -0.5342 |      |
| EDRN 46           | Sc normal | -1.2478 | -0.2269  |      | -0.3750 | -3.2965 | -1.0989 |      |
| EDRN 47           | Sc normal |         | 1.1000   |      | 0.0526  | 0.5431  | -2.1144 |      |
| EDRN 48           | Sc normal | 1.8304  | 0.7594   |      | 0.3833  | 0.3461  |         |      |
| EDRN 49           | Early CRC |         | 0.2557   |      | 0.4779  | 0.7104  | -1.3372 |      |
| EDRN 50           | Early CRC |         | -1.0060  |      | 0.4654  | -0.7473 | -0.5341 |      |
| EDRN 51           | Early CRC |         | 0.6690   |      | 0.4048  | 0.2492  | -0.7138 |      |
| EDRN 52           | Early CRC |         | 0.6022   |      | 0.5185  | -0.4943 | 0.5164  |      |
| EDRN 53           | Late CRC  |         | 0.9440   |      | 0.5055  | -0.0789 | 0.0209  |      |
| EDRN 54           | Late CRC  |         | 0.7521   |      | 0.5117  | -0.2541 |         |      |
| EDRN 55           | Late CRC  |         | 0.8397   |      | 0.7881  | 0.3047  |         |      |
| EDRN 56           | Late CRC  |         | -0.1577  |      | 0.4810  | -0.3258 | -1.6168 |      |
| EDRN 57           | A-Adenoma |         | 1.0301   |      | 0.2335  | 2.6088  |         |      |
| EDRN 58           | A-Adenoma |         | 2.1685   |      | 0.3451  | 0.3811  | -0.6365 |      |
| EDRN 59           | A-Adenoma |         | 0.6876   |      | 0.2186  | 0.3930  | -0.9765 |      |
| EDRN 60           | A-Adenoma |         | 1.6906   |      | 0.3153  | -1.0145 | -0.1801 |      |
| EDRN 61           | Adenomas  | 0.7910  | -0.7863  |      | 0.2702  | 1.0261  | 0.6825  |      |
| EDRN 62           | Adenomas  | 2.2627  | -0.6465  |      | 0.2345  | -0.7642 | 1.5362  |      |
| EDRN 63           | Adenomas  | 0.0319  | -0.0771  |      | 0.6874  | 0.0286  | 0.8271  |      |
| EDRN 64           | Adenomas  | -0.5102 | -0.0937  |      | 0.2190  | 0.4144  | 1.0826  |      |
| EDRN 65           | Sv normal | 0.4558  | -0.2618  |      | -2.4608 | 0.7911  | 1.2296  |      |
| EDRN 66           | Sv normal | 0.2197  | 3.6679   |      | -0.0312 | -0.0843 |         |      |
| EDRN 67           | Sv normal | -0.1810 | 0.1884   |      | 0.5795  | -0.9650 | 1.3690  |      |

| Sample ID         | Status    | MAPK1   | MARCKSL1 | MDM2 | MLL3    | MSMB    | NAIP    | NAT1 |
|-------------------|-----------|---------|----------|------|---------|---------|---------|------|
| Confirmed in EDRN |           | v       |          |      |         | v       | v       |      |
| EDRN 68           | Sv normal | 0.4185  | -0.3097  |      | 0.6178  | -0.3876 | 1.2511  |      |
| EDRN 69           | Sc normal | 0.6151  | 0.0225   |      | 0.6079  | -0.2206 | 1.3862  |      |
| EDRN 70           | Sc normal | 1.4626  | -0.0496  |      | 0.3630  | 1.1718  | 0.7244  |      |
| EDRN 71           | Sc normal | 1.1165  | -0.4616  |      | 0.6700  | 0.8068  | 0.8180  |      |
| EDRN 72           | Sc normal | 0.5299  | 0.4561   |      | 0.8222  | 0.6952  | 0.1209  |      |
| EDRN 73           | Early CRC | 0.4925  | -0.4151  |      | 0.3255  | 0.8182  | 1.0396  |      |
| EDRN 74           | Early CRC | -0.2290 | -0.0725  |      | 0.5379  | 0.9346  | 0.1886  |      |
| EDRN 75           | Early CRC | 0.5719  | 0.2021   |      | 0.5852  | 0.5239  |         |      |
| EDRN 76           | Early CRC | 0.2663  | 0.1241   |      | 0.5139  | 0.9668  | 1.4775  |      |
| EDRN 77           | Late CRC  | 1.5515  | 0.4473   |      | 0.4459  | 1.4675  |         |      |
| EDRN 78           | Late CRC  | 2.1454  | 0.5790   |      | 0.7902  | 0.5358  | 0.6083  |      |
| EDRN 79           | Late CRC  | 0.6929  | 0.3442   |      | 1.0963  | 0.8390  | 0.8044  |      |
| EDRN 80           | Late CRC  | 0.6063  | 0.7271   |      | 0.9331  | 1.0657  | 0.2426  |      |
| EDRN 81           | A-Adenoma | 2.8447  | 1.3155   |      | 1.1544  | -0.1726 |         |      |
| EDRN 82           | A-Adenoma |         | 0.7001   |      | 0.8024  | 0.0971  | 1.9463  |      |
| EDRN 83           | A-Adenoma | 1.7855  | 1.4628   |      | 0.9686  | 0.5297  | 2.2843  |      |
| EDRN 84           | A-Adenoma | 2.1199  | 1.2088   |      | 0.7897  | -0.7553 | 0.6071  |      |
| EDRN 85           | Adenomas  | 1.5273  | 0.9241   |      | 0.5019  | 0.0797  | -0.0261 |      |
| EDRN 86           | Adenomas  | 1.3825  | 0.7435   |      | 0.7267  | -0.2512 | -0.3686 |      |
| EDRN 87           | Adenomas  | 0.0624  | 0.2326   |      | 1.1682  | 0.1913  | 0.4148  |      |
| EDRN 88           | Adenomas  | 1.6841  | 1.0304   |      | 0.7195  | 0.7693  | 0.9815  |      |
| EDRN 89           | Sv normal | 0.3112  | 0.1995   |      | -0.1829 | -0.3991 | -1.3480 |      |
| EDRN 90           | Sv normal | -0.7279 | 0.1459   |      | -2.3217 | -0.5899 | -0.8139 |      |
| EDRN 91           | Sv normal | 0.7133  | 0.1037   |      | 0.0688  | -0.0426 | -0.9077 |      |
| EDRN 92           | Sv normal | 1.1641  | 0.8879   |      | 0.6460  | -0.6319 | 1.1374  |      |
| EDRN 93           | Sc normal | 0.1169  | -0.0242  |      | 0.2462  | 0.8401  | -0.7460 |      |
| EDRN 94           | Sc normal | 0.4246  | 0.1400   |      | 0.7556  |         | -0.4617 |      |
| EDRN 95           | Sc normal |         | 0.3314   |      | 0.3053  | -0.8321 | -0.8841 |      |
| EDRN 96           | Sc normal | -0.8918 | -1.2135  |      | -3.7317 | -1.6537 | -0.5719 |      |
| EDRN 97           | Early CRC | 2.1932  | 0.5392   |      | 0.2827  | 0.7353  | 0.8371  |      |
| EDRN 98           | Early CRC | 0.5426  | 1.0371   |      | 0.3127  | 0.4687  | 1.4519  |      |
| EDRN 99           | Early CRC | 0.9527  | 0.4791   |      | -0.0500 | 0.0900  | 1.8016  |      |
| EDRN 100          | Early CRC | 1.2320  | 0.3610   |      | 0.3888  |         | 0.8940  |      |
| EDRN 101          | Late CRC  | 0.8107  | 0.1249   |      | 0.3933  | 0.0581  | 0.0273  |      |
| EDRN 102          | Late CRC  | 2.7224  | 0.4162   |      | 0.4381  | 0.5661  | 0.5814  |      |
| EDRN 103          | Late CRC  |         | -0.5906  |      | 0.2934  | -0.3882 | -1.0433 |      |
| EDRN 104          | Late CRC  | 0.0274  | 0.1229   |      | 0.2410  | 0.0647  | -0.4348 |      |
| EDRN 105          | A-Adenoma | 1.3424  | 1.0834   |      | 0.5030  | -0.2837 | 0.1308  |      |
| EDRN 106          | A-Adenoma | 2.2285  | 0.5258   |      | 0.2368  | 1.3637  | 0.5113  |      |
| EDRN 107          | A-Adenoma | -0.1510 | 0.5917   |      | 0.3169  | 1.5318  | 0.2234  |      |
| EDRN 108          | A-Adenoma | 1.1905  | 0.9133   |      | 0.5559  | 0.4119  | 1.7577  |      |
| EDRN 109          | Adenomas  | 0.7659  | 1.0772   |      | 0.9128  | 0.8615  | 0.8883  |      |
| EDRN 110          | Adenomas  |         | 0.5374   |      |         | 0.3064  | -0.0702 |      |
| EDRN 111          | Adenomas  | 2.1294  | 0.1259   |      | 0.4655  | 0.0565  | 0.8122  |      |
| EDRN 112          | Adenomas  | -2.3681 | -0.8660  |      | -0.8720 | -3.0386 | -0.7744 |      |

| Sample ID         | Status    | MAPK1   | MARCKSL1 | MDM2 | MLL3    | MSMB    | NAIP    | NAT1 |
|-------------------|-----------|---------|----------|------|---------|---------|---------|------|
| Confirmed in EDRN |           | v       |          |      |         | v       | v       |      |
| EDRN 113          | Sv normal |         | 0.5895   |      | 0.2871  | 0.6622  | 0.3166  |      |
| EDRN 114          | Sv normal | 0.0920  | 0.4890   |      | 0.5892  | 1.0101  | 0.3985  |      |
| EDRN 115          | Sv normal | 0.8399  | 0.1591   |      | 0.8156  | 0.0177  | -0.2036 |      |
| EDRN 116          | Sv normal | 0.0971  | -0.3836  |      | -0.0054 | -0.4139 | -1.0640 |      |
| EDRN 117          | Sc normal | 0.3958  | 0.9081   |      | 0.4296  |         | 0.1338  |      |
| EDRN 118          | Sc normal | 1.6990  | 0.6179   |      | 0.3670  | 1.1050  | 0.4488  |      |
| EDRN 119          | Sc normal | -0.2538 | -0.1344  |      | 0.3808  | -0.6300 | 0.0247  |      |
| EDRN 120          | Sc normal | 1.0559  | 1.4007   |      | 0.1609  | -0.5331 | -0.8156 |      |
| EDRN 121          | Early CRC | -0.1858 | 0.7307   |      | 0.5061  | -0.2822 |         |      |
| EDRN 122          | Early CRC |         | 0.1444   |      | 0.3061  | -0.4443 | -0.3419 |      |
| EDRN 123          | Early CRC |         | -0.3818  |      | 0.2411  | 0.2133  | 1.5153  |      |
| EDRN 124          | Early CRC | 0.0969  | 0.6613   |      | 0.1309  | -0.0205 | 0.2220  |      |
| EDRN 125          | Late CRC  | 2.1753  | 0.4523   |      | 0.3887  | 0.3346  | -0.2348 |      |
| EDRN 126          | Late CRC  | 1.4022  | 0.7263   |      | 0.4195  | 0.3569  | 0.0929  |      |
| EDRN 127          | Late CRC  | 0.0152  | 0.5937   |      | 0.6030  | 0.7461  |         |      |
| EDRN 128          | Late CRC  | 1.2087  | 0.7586   |      | 0.3044  | 1.1952  | 1.3797  |      |
| EDRN 129          | A-Adenoma | 0.6427  | 0.9402   |      | 0.1545  | 0.3420  | 0.7594  |      |
| EDRN 130          | A-Adenoma | 1.6264  | 0.9206   |      | 0.7364  | -0.2866 | 0.3806  |      |
| EDRN 131          | A-Adenoma | 1.7343  | 0.6281   |      | 0.2625  | 0.9439  | 0.6415  |      |
| EDRN 132          | A-Adenoma | 1.8014  | 0.3426   |      | 0.2407  | 0.3982  | 0.0275  |      |
| EDRN 133          | Adenomas  |         | -0.4948  |      | -0.8952 | 1.4260  | 0.3594  |      |
| EDRN 134          | Adenomas  | -0.2156 | 0.4895   |      | 0.2268  | 0.6194  |         |      |
| EDRN 135          | Adenomas  | 3.2801  | 0.8118   |      | 0.0210  | -0.3080 | 1.3319  |      |
| EDRN 136          | Adenomas  | 0.2144  | -0.6357  |      | -0.0944 | 0.4749  | 0.8269  |      |
| EDRN 137          | Sv normal | -0.8158 | 0.9233   |      | -0.2999 | -0.4753 | -0.2752 |      |
| EDRN 138          | Sv normal | 1.0704  | 0.0691   |      | 0.3091  | -1.3694 | 0.1589  |      |
| EDRN 139          | Sv normal |         | 0.6565   |      | 0.3843  | 0.4632  | -0.4798 |      |
| EDRN 140          | Sv normal | 0.9257  | 0.8742   |      | 0.7212  | 0.0837  | -0.5726 |      |
| EDRN 141          | Sc normal |         | -0.1613  |      | -0.7606 | 0.3557  | -0.0123 |      |
| EDRN 142          | Sc normal |         | 0.8381   |      | 2.9264  | -1.5868 | 0.7131  |      |
| EDRN 143          | Sc normal | 0.7889  | -0.0979  |      | 0.4323  | 0.6901  |         |      |
| EDRN 144          | Sc normal | -0.0239 | 0.3349   |      | 0.5800  | 0.3744  | -0.9230 |      |
| EDRN 145          | Early CRC | 0.7351  | 1.5109   |      | 0.5661  | 0.7044  |         |      |
| EDRN 146          | Early CRC | 1.1705  | 3.7781   |      | 0.1347  | -0.8418 | 0.3296  |      |
| EDRN 147          | Early CRC | 1.6714  | 0.3884   |      | 0.4926  | 1.1290  | 0.0448  |      |
| EDRN 148          | Early CRC | 3.0160  | -0.0765  |      | 0.5637  | 0.4121  | 0.1825  |      |
| EDRN 149          | Late CRC  | 0.5932  | 0.5078   |      | 0.6469  | 0.0950  | 0.6147  |      |
| EDRN 150          | Late CRC  | 2.8855  | 0.7031   |      | 0.5399  | 0.9063  | 1.3061  |      |
| EDRN 151          | Late CRC  | 1.3391  | 0.4521   |      | 0.4228  | 1.5914  | 0.4674  |      |
| EDRN 152          | Late CRC  | 1.1529  | 0.2865   |      | 0.5387  |         | -0.0945 |      |
| EDRN 153          | A-Adenoma |         | 0.0189   |      | 0.2676  | -1.4718 |         |      |
| EDRN 154          | A-Adenoma | -0.3195 | 0.9698   |      | 0.1538  | -0.0551 | 0.5938  |      |
| EDRN 155          | A-Adenoma | 1.8085  | 1.9002   |      | 0.4861  | 0.1940  | -0.0891 |      |
| EDRN 156          | A-Adenoma | 1.2874  | 1.1283   |      | 0.2529  | -0.1228 | 1.2435  |      |
| EDRN 157          | Adenomas  | 2.2124  | 0.9662   |      | 0.4582  | 1.2231  | 1.6468  |      |

| Sample            | ID  | Status    | MAPK1   | MARCKSL1 | MDM2 | MLL3    | MSMB    | NAIP    | NAT1 |
|-------------------|-----|-----------|---------|----------|------|---------|---------|---------|------|
| Confirmed in EDRN |     |           | v       |          |      |         | v       | v       |      |
| EDRN              | 158 | Adenomas  | 0.8250  | -0.7621  |      | 0.1299  | 1.7484  | 0.7538  |      |
| EDRN              | 159 | Adenomas  | -0.4885 | 0.0292   |      | -0.2531 | 0.1927  | 0.4576  |      |
| EDRN              | 160 | Adenomas  |         | 0.0488   |      | -0.0270 | -0.2003 | -0.4923 |      |
| EDRN              | 161 | Sv normal | -0.0362 | 0.8145   |      | 0.1550  | 0.3841  | -0.9087 |      |
| EDRN              | 162 | Sv normal | -1.1683 | -0.1019  |      | 0.2022  | -1.5682 | 0.1517  |      |
| EDRN              | 163 | Sv normal | -0.1085 | -0.2396  |      | 0.3079  | -0.2572 | -0.4214 |      |
| EDRN              | 164 | Sv normal | 0.5501  | -0.5760  |      | 0.1314  | 0.8169  | -0.9505 |      |
| EDRN              | 165 | Sc normal | -0.2406 | -1.0730  |      | 0.0817  | -1.0897 | -1.5094 |      |
| EDRN              | 166 | Sc normal | -1.5241 | -0.3177  |      | 0.7492  | -0.6224 | 1.6300  |      |
| EDRN              | 167 | Sc normal | 0.4321  | -0.1528  |      | 0.3774  | 0.8767  | 0.7214  |      |
| EDRN              | 168 | Sc normal | 2.1177  | -0.0786  |      | 0.4664  | -0.1081 | 0.3363  |      |
| EDRN              | 169 | Early CRC | 3.3573  | -0.2057  |      | 0.6441  | -0.4263 | -1.4548 |      |
| EDRN              | 170 | Early CRC |         | -0.7459  |      | 0.3591  | -0.6365 | 0.8339  |      |
| EDRN              | 171 | Late CRC  |         | 0.2692   |      | 0.8376  | 1.7727  | 0.2819  |      |
| EDRN              | 172 | Late CRC  | 8.4921  | 0.5161   |      | 0.6762  | 0.9198  | 1.8701  |      |
| EDRN              | 173 | A-Adenoma | -0.4748 | 0.4056   |      | 0.5282  | 0.8204  | 0.4202  |      |
| EDRN              | 174 | A-Adenoma | -1.5795 | 0.4183   |      | -0.0515 | 0.1805  | 1.3553  |      |
| EDRN              | 175 | Adenomas  | -2.6087 | 0.9084   |      | 0.9981  | 1.1019  | 0.8240  |      |
| EDRN              | 176 | Adenomas  |         | 1.0503   |      |         | 0.9446  | -0.4054 |      |
| EDRN              | 177 | Sv normal | -0.6493 | 0.5715   |      | 1.1067  | 0.0686  | 1.4074  |      |
| EDRN              | 178 | Sv normal |         | 0.7665   |      | -0.3634 |         | -1.3962 |      |
| EDRN              | 179 | Sc normal | -0.4544 | 0.2771   |      | -2.3446 | -3.2634 | -1.4801 |      |
| EDRN              | 180 | Sc normal |         | 0.8308   |      | 1.1310  | 0.7256  | 1.1606  |      |



| Sample ID                | Status  | NBN      | NOS3    | NPTX2    | PALB2   | PBX3     | PHB      | PHYH    |
|--------------------------|---------|----------|---------|----------|---------|----------|----------|---------|
| <b>Confirmed in EDRN</b> |         |          |         |          |         |          | <b>v</b> |         |
| CHS 1                    | Control | -17.2267 | -4.1611 | -14.6151 | -1.9166 | -5.7368  | 0.1835   | -3.5160 |
| CHS 2                    | Cancer  | -17.8737 | -5.3325 | -16.7164 | -3.8925 | -7.4491  | -1.0176  | -2.2027 |
| CHS 3                    | Cancer  | -15.8278 | -5.5706 | -16.0841 | -2.8709 | -6.2405  | -2.9047  | -3.1181 |
| CHS 4                    | Control | -18.3266 | -6.8046 | -18.1913 | -3.3171 | -7.5722  | -2.7635  | -3.0900 |
| CHS 5                    | Control | -17.7075 | -5.9806 | -19.7169 | -4.3444 | -6.7649  | -1.9764  | -2.7806 |
| CHS 6                    | Cancer  | -16.8185 | -6.5247 | -13.6408 | -4.2822 | -7.9075  | -1.0339  | -2.4074 |
| CHS 7                    | Control | -15.7880 | -6.7563 | -17.0329 | -5.5629 | -6.9053  | -1.3763  | -2.0763 |
| CHS 8                    | Cancer  | -15.7742 | -5.9153 | -15.6683 | -4.7316 | -7.0897  | -1.1292  | -1.7859 |
| CHS 9                    | Cancer  | -15.9645 | -5.6133 | -13.9387 | -4.7811 | -6.5428  | -1.3009  | -1.7061 |
| CHS 10                   | Control | -16.9137 | -6.7811 | -15.7774 | -4.7242 | -6.5488  | -1.5881  | -2.3777 |
| CHS 11                   | Control | -18.5180 | -8.2485 | -17.4009 | -6.1821 | -9.1415  | -4.1006  | -1.5349 |
| CHS 12                   | Cancer  | -17.5339 | -7.1946 | -14.6914 | -3.9165 | -7.6551  | -2.4406  | -1.5429 |
| CHS 13                   | Cancer  | -17.4914 | -5.6933 | -16.4972 | -3.8052 | -5.1918  | -1.1264  | -1.6015 |
| CHS 14                   | Control | -17.6633 | -5.6868 | -14.9629 | -3.3571 | -6.7668  | -1.5046  | -2.6465 |
| CHS 15                   | Control | -17.2771 | -5.7530 | -16.0076 | -3.9310 | -6.8576  | -1.3088  | -2.8025 |
| CHS 16                   | Cancer  | -17.3562 | -5.8292 | -15.3802 | -3.9311 | -6.9883  | -1.8467  | -3.5716 |
| CHS 17                   | Cancer  | -16.6838 | -5.0676 | -17.4723 | -2.2942 | -6.5251  | -0.2044  | -2.9518 |
| CHS 18                   | Control | -17.9969 | -6.2385 | -16.4686 | -3.4228 | -6.5953  | -0.0554  | -3.6593 |
| CHS 19                   | Cancer  | -17.6484 | -6.5037 | -16.2940 | -4.1370 | -6.9175  | -1.9337  | -3.2824 |
| CHS 20                   | Control | -18.8180 | -6.5637 | -15.1559 | -4.9626 | -8.7856  | -2.9153  | -3.8530 |
| CHS 21                   | Cancer  | -15.4161 | -5.4128 | -15.5892 | -3.3675 | -6.0745  | -2.1503  | -2.0942 |
| CHS 22                   | Control | -16.8403 | -7.2802 | -16.7164 | -6.1264 | -7.9399  | -2.8655  | -2.6849 |
| CHS 23                   | Cancer  | -16.2731 | -5.2943 | -15.6205 | -3.8503 | -5.7907  | -0.6743  | -3.3607 |
| CHS 24                   | Control | -20.7786 | -8.6673 | -17.7359 | -6.2278 | -11.1150 | -3.2207  | -4.9783 |
| CHS 25                   | Cancer  | -17.3889 | -6.0983 | -15.6038 | -3.7078 | -7.2663  | -1.6096  | -2.2546 |
| CHS 26                   | Control | -17.8181 | -6.2345 | -15.6312 | -4.1772 | -6.9997  | -1.5613  | -2.1567 |
| CHS 27                   | Cancer  | -16.6708 | -6.9490 | -18.0250 | -3.2885 | -7.0850  | -3.0930  | -2.8420 |
| CHS 28                   | Control | -16.9953 | -4.5985 | -15.9087 | -3.1861 | -6.7458  | -0.9112  | -1.2787 |
| CHS 29                   | Cancer  | -17.5159 | -6.0745 | -16.2955 | -4.0591 | -6.6958  | -1.0548  | -2.3072 |
| CHS 30                   | Control | -17.0158 | -6.5763 | -17.9730 | -4.6908 | -6.3317  | -2.8276  | -3.4771 |
| CHS 31                   | Control | -17.6617 | -5.3322 | -15.0521 | -3.9868 | -7.2169  | -1.1517  | -2.2410 |
| CHS 32                   | Cancer  | -18.1371 | -6.3821 | -16.9929 | -4.4679 | -7.4069  | -1.1283  | -3.3659 |
| CHS 33                   | Cancer  | -16.9175 | -5.6576 | -16.7016 | -3.0906 | -6.4233  | -2.2526  | -3.2629 |
| CHS 34                   | Control | -17.5212 | -6.5297 | -17.2386 | -3.2573 | -6.9717  | -1.4825  | -3.5867 |
| CHS 35                   | Control | -17.7779 | -7.4512 | -15.3422 | -5.3733 | -7.5961  | -2.0065  | -2.7440 |
| CHS 36                   | Cancer  | -16.9665 | -6.1232 | -15.3038 | -3.8504 | -7.4983  | -2.8174  | -3.4180 |
| CHS 37                   | Cancer  | -17.3380 | -6.7857 | -14.9904 | -5.4001 | -6.9195  | -2.1244  | -2.4065 |
| CHS 38                   | Control | -17.6359 | -7.3155 | -16.5589 | -5.3404 | -7.5229  | -2.4947  | -2.3143 |
| CHS 39                   | Control | -17.5465 | -8.1402 | -16.6181 | -4.2866 | -8.3200  | -2.2258  | -3.7090 |
| CHS 40                   | Cancer  | -16.4707 | -5.3898 | -15.7242 | -3.8107 | -6.7731  | -1.2317  | -1.6185 |
| CHS 41                   | Control | -17.7479 | -6.2939 | -17.2597 | -4.2405 | -7.4632  | -1.5713  | -2.9989 |
| CHS 42                   | Cancer  | -16.8191 | -6.4430 | -16.4786 | -4.6739 | -7.1226  | -2.0217  | -3.5932 |
| CHS 43                   | Control | -17.4975 | -5.4523 | -16.0613 | -3.9211 | -7.2215  | -1.3165  | -2.3956 |
| CHS 44                   | Cancer  | -16.9598 | -5.8307 | -14.9398 | -4.5355 | -6.9451  | -1.7133  | -3.0227 |
| CHS 45                   | Control | -16.6389 | -7.0480 | -15.3027 | -4.6859 | -7.5511  | -2.0495  | -3.3515 |

| Sample ID                | Status  | NBN      | NOS3    | NPTX2    | PALB2   | PBX3    | PHB      | PHYH    |
|--------------------------|---------|----------|---------|----------|---------|---------|----------|---------|
| <b>Confirmed in EDRN</b> |         |          |         |          |         |         | <b>v</b> |         |
| CHS 46                   | Cancer  | -16.4136 | -4.9903 | -15.2416 | -2.7394 | -6.5300 | -0.4554  | -1.7085 |
| CHS 47                   | Cancer  | -17.3620 | -5.7930 | -16.2845 | -4.5580 | -7.1833 | -0.8514  | -2.4061 |
| CHS 48                   | Control | -17.6998 | -5.3840 | -15.8467 | -4.6072 | -7.3128 | -1.3024  | -3.1655 |
| CHS 49                   | Cancer  | -17.5220 | -6.9767 | -15.7394 | -5.1580 | -6.8324 | -1.7303  | -2.5339 |
| CHS 50                   | Control | -17.8510 | -6.5698 | -15.9450 | -3.9860 | -6.3118 | -1.9586  | -2.4751 |
| CHS 51                   | Cancer  | -18.2371 | -5.9773 | -16.7735 | -4.9405 | -7.2205 | -1.3647  | -2.1571 |
| CHS 52                   | Control | -18.0665 | -6.4941 | -16.5712 | -5.0991 | -7.4049 | -1.6498  | -3.9717 |
| CHS 53                   | Control | -17.0937 | -6.5003 | -16.5563 | -4.0842 | -6.5985 | -2.8497  | -3.1852 |
| CHS 54                   | Cancer  | -17.3178 | -6.8772 | -15.7747 | -4.0165 | -7.0751 | -1.3220  | -2.5119 |
| CHS 55                   | Cancer  | -17.7938 | -7.5351 | -15.5824 | -4.8624 | -7.4161 | -1.9958  | -4.1240 |
| CHS 56                   | Control | -15.8980 | -7.2512 | -16.9440 | -5.1586 | -7.4182 | -4.4608  | -3.2532 |
| CHS 57                   | Control | -17.1021 | -6.2735 | -16.0054 | -3.9696 | -7.4209 | -1.1997  | -3.6688 |
| CHS 58                   | Cancer  | -17.4319 | -6.2869 | -16.1167 | -4.7310 | -6.6209 | -1.4415  | -2.3692 |
| CHS 59                   | Cancer  | -16.1282 | -5.9015 | -17.3156 | -3.8777 | -5.5264 | -1.6870  | -3.7655 |
| CHS 60                   | Control | -17.2050 | -5.7385 | -15.7795 | -4.8800 | -7.1445 | -1.7750  | -2.0044 |
| CHS 61                   | Cancer  | -17.7447 | -6.0244 | -16.6545 | -4.4645 | -8.0214 | -1.4962  | -0.3403 |
| CHS 62                   | Control | -18.1248 | -7.2163 | -16.1649 | -4.7385 | -8.1753 | -3.3073  | -3.7027 |
| CHS 63                   | Cancer  | -16.5555 | -4.4260 | -14.8336 | -3.4846 | -7.3265 | -0.1029  | -2.1419 |
| CHS 64                   | Control | -17.2057 | -7.6739 | -17.6840 | -4.4275 | -7.7714 | -3.2960  | -3.6350 |
| CHS 65                   | Cancer  | -16.3247 | -4.7633 | -14.4717 | -4.1405 | -7.4663 | -0.0151  | -2.2124 |
| CHS 66                   | Control | -15.9183 | -3.9871 | -15.9195 | -3.3067 | -6.9686 | -0.7936  | -1.6778 |
| CHS 67                   | Control | -17.7954 | -7.4423 | -16.5151 | -5.0034 | -8.1215 | -3.5423  | -3.9978 |
| CHS 68                   | Cancer  | -16.5737 | -6.0106 | -15.8410 | -2.3261 | -8.0676 | -2.2336  | -3.1630 |
| CHS 69                   | Cancer  | -17.1734 | -5.6078 | -16.0167 | -2.4647 | -6.7091 | -0.0163  | -2.4099 |
| CHS 70                   | Control | -17.8033 | -6.3733 | -15.4324 | -2.8622 | -7.3990 | -0.2723  | -2.6535 |
| CHS 71                   | Cancer  | -17.7788 | -5.5893 | -15.8034 | -4.1605 | -6.7558 | -0.7407  | -2.1383 |
| CHS 72                   | Control | -17.8711 | -5.3769 | -16.9344 | -3.7925 | -5.3297 | -2.0034  | -1.5324 |
| CHS 73                   | Control | -18.7092 | -7.0298 | -17.2017 | -5.8144 | -9.2004 | -2.2938  | -4.1815 |
| CHS 74                   | Cancer  | -16.8642 | -6.3452 | -15.4813 | -3.4215 | -5.8813 | -1.8406  | -3.9453 |
| CHS 75                   | Cancer  | -16.9142 | -5.1876 | -14.9926 | -4.2133 | -7.7452 | -1.2910  | -1.7989 |
| CHS 76                   | Control | -17.0546 | -7.1538 | -16.3776 | -4.1040 | -7.3554 | -2.3706  | -3.5887 |
| CHS 77                   | Control | -18.0580 | -7.4407 | -16.3214 | -4.6415 | -8.0261 | -2.2752  | -4.4785 |
| CHS 78                   | Cancer  | -16.8011 | -5.9329 | -16.6333 | -4.2283 | -6.7542 | -1.8041  | -2.9033 |
| CHS 79                   | Cancer  | -17.0874 | -5.0785 | -15.4784 | -3.9792 | -6.8631 | -1.1107  | -0.9049 |
| CHS 80                   | Control | -16.4757 | -5.3734 | -15.4321 | -4.2431 | -6.9129 | -0.6503  | -1.1152 |
| CHS 81                   | Control | -17.4088 | -6.0639 | -15.9771 | -4.4455 | -8.0646 | -1.3067  | -3.5356 |
| CHS 82                   | Cancer  | -16.8256 | -7.0105 | -15.3874 | -4.8018 | -6.4179 | -2.1038  | -3.8575 |
| CHS 83                   | Cancer  | -16.4203 | -6.1690 | -15.0194 | -3.4177 | -6.4271 | -1.5018  | -1.9792 |
| CHS 84                   | Control | -16.6210 | -7.0608 | -16.0570 | -3.8079 | -6.4402 | -2.4527  | -1.9176 |
| CHS 85                   | Cancer  | -16.9314 | -6.2570 | -15.9812 | -3.6299 | -7.2778 | -2.3256  | -2.5792 |
| CHS 86                   | Control | -18.4096 | -6.6550 | -16.6719 | -4.6075 | -8.3456 | -2.4419  | -3.2737 |
| CHS 87                   | Control | -17.3807 | -6.0419 | -17.2105 | -5.0341 | -8.0141 | -2.0332  | -3.3449 |
| CHS 88                   | Cancer  | -18.0380 | -6.3565 | -16.3684 | -3.9933 | -7.2293 | -1.6444  | -0.9939 |
| CHS 89                   | Control | -17.6504 | -6.2949 | -16.0807 | -4.0006 | -7.1998 | -1.2829  | -3.0255 |
| CHS 90                   | Cancer  | -16.9638 | -5.6257 | -16.4491 | -3.9026 | -6.7232 | -0.7767  | -2.9795 |

| Sample ID                | Status  | NBN      | NOS3    | NPTX2    | PALB2   | PBX3     | PHB      | PHYH    |
|--------------------------|---------|----------|---------|----------|---------|----------|----------|---------|
| <b>Confirmed in EDRN</b> |         |          |         |          |         |          | <b>v</b> |         |
| CHS 91                   | Cancer  | -17.4895 | -5.5705 | -16.0485 | -3.9381 | -6.7941  | -1.2705  | -2.1265 |
| CHS 92                   | Control | -17.2815 | -6.0652 | -16.5761 | -4.4381 | -7.1142  | -1.5636  | -2.5823 |
| CHS 93                   | Control | -17.6607 | -6.6793 | -18.0233 | -3.0777 | -7.6078  | -2.8879  | -2.2859 |
| CHS 94                   | Cancer  | -17.1859 | -5.2348 | -16.3911 | -3.4551 | -5.8443  | -0.9882  | -1.3563 |
| CHS 95                   | Control | -17.2984 | -5.7205 | -15.0019 | -4.4729 | -7.0295  | -0.9293  | -3.4236 |
| CHS 96                   | Cancer  | -16.9865 | -6.5261 | -16.2131 | -4.2672 | -5.8343  | -2.1086  | -3.4477 |
| CHS 97                   | Cancer  | -17.2451 | -5.5259 | -16.1040 | -4.2789 | -7.2930  | -1.5229  | -2.6121 |
| CHS 98                   | Control | -19.2851 | -6.6153 | -18.0946 | -5.9734 | -8.1766  | -4.8776  | -4.8537 |
| CHS 99                   | Cancer  | -17.3639 | -4.6144 | -17.3993 | -3.9261 | -7.7033  | -1.4931  | -3.6229 |
| CHS 100                  | Control | -16.2413 | -5.1200 | -16.2465 | -3.6203 | -7.0437  | -2.0695  | -3.4730 |
| CHS 101                  | Cancer  | -16.6276 | -5.1854 | -14.9986 | -3.2214 | -6.7551  | -1.8158  | -2.0538 |
| CHS 102                  | Control | -16.3684 | -5.2538 | -14.6850 | -1.9763 | -6.5649  | -0.5318  | -2.6947 |
| CHS 103                  | Cancer  | -16.9118 | -6.1690 | -16.3862 | -4.0517 | -6.8839  | -2.1082  | -1.5254 |
| CHS 104                  | Control | -17.1285 | -6.4782 | -16.4658 | -5.7381 | -8.0360  | -2.1006  | -4.0053 |
| CHS 105                  | Cancer  | -16.4700 | -6.0071 | -15.9366 | -3.4866 | -5.9044  | -2.1203  | -1.9892 |
| CHS 106                  | Control | -18.1197 | -8.0909 | -16.1106 | -4.6131 | -7.2735  | -1.7908  | -3.4163 |
| CHS 107                  | Cancer  | -17.5668 | -6.6790 | -16.3587 | -4.4787 | -7.1697  | -2.2758  | -2.6031 |
| CHS 108                  | Control | -16.8409 | -5.7821 | -15.3920 | -4.1506 | -7.0417  | -1.1138  | -2.7412 |
| CHS 109                  | Control | -17.6001 | -6.3125 | -16.8666 | -4.0351 | -7.3654  | -1.9352  | -3.1108 |
| CHS 110                  | Cancer  | -17.7969 | -7.0337 | -15.6806 | -5.4009 | -8.2504  | -1.9315  | -4.1549 |
| CHS 111                  | Control | -17.9990 | -7.3557 | -16.5806 | -4.5607 | -7.1808  | -1.4596  | -4.1219 |
| CHS 112                  | Cancer  | -17.6041 | -5.5008 | -15.3154 | -3.4702 | -6.5216  | -1.2146  | 0.2334  |
| CHS 113                  | Control | -17.2382 | -4.9943 | -15.9388 | -3.9470 | -5.6222  | -0.7726  | -0.5823 |
| CHS 114                  | Cancer  | -17.2741 | -7.3587 | -16.0726 | -4.8186 | -7.2728  | -2.1532  | -3.7588 |
| CHS 117                  | Control | -17.4183 | -6.7456 | -16.6640 | -3.8619 | -7.1817  | -1.0015  | -2.7355 |
| CHS 118                  | Cancer  | -17.2745 | -6.4851 | -16.1717 | -4.4241 | -7.7954  | -1.0901  | -2.8961 |
| CHS 119                  | Cancer  | -16.2573 | -6.0986 | -15.5342 | -3.6640 | -6.9212  | -0.9798  | -1.8887 |
| CHS 120                  | Control | -17.3418 | -7.0612 | -16.0913 | -3.9096 | -6.8864  | -1.4585  | -1.5502 |
| CHS 121                  | Control | -17.4975 | -6.7270 | -16.7423 | -4.3161 | -7.4824  | -1.7257  | -3.0959 |
| CHS 122                  | Cancer  | -16.5785 | -6.8066 | -15.6751 | -4.4177 | -7.4460  | -0.8666  | -4.2440 |
| CHS 123                  | Cancer  | -16.4745 | -6.9281 | -15.7618 | -3.5432 | -6.2733  | -1.8327  | -3.4777 |
| CHS 124                  | Control | -15.8172 | -6.4102 | -16.9507 | -3.9078 | -6.4234  | -1.8381  | -2.0742 |
| CHS 125                  | Cancer  | -17.9132 | -7.1551 | -16.8921 | -4.6753 | -7.8275  | -2.6434  | -3.6003 |
| CHS 126                  | Control | -16.1667 | -5.8778 | -15.5384 | -3.1706 | -6.9319  | -1.4136  | -2.3685 |
| CHS 127                  | Cancer  | -16.6170 | -4.7689 | -13.6340 | -3.6283 | -6.7790  | -0.4388  | 1.6042  |
| CHS 128                  | Control | -19.0865 | -7.3229 | -16.7954 | -5.7429 | -10.0339 | -3.0318  | -5.5716 |
| CHS 129                  | Control | -18.1351 | -7.8880 | -17.9640 | -5.0589 | -8.4052  | -3.2475  | -5.2899 |
| CHS 130                  | Cancer  | -17.6166 | -8.2029 | -16.8494 | -4.8947 | -7.6352  | -2.8765  | -3.1355 |
| CHS 131                  | Cancer  | -16.7928 | -6.0916 | -16.6591 | -3.4431 | -6.4363  | -2.2276  | -1.9555 |
| CHS 132                  | Control | -17.2615 | -6.1511 | -15.9411 | -3.6747 | -5.8516  | -3.0115  | -2.7403 |
| CHS 133                  | Cancer  | -18.8338 | -7.7260 | -17.9901 | -5.5790 | -8.8111  | -3.0175  | -4.0884 |
| CHS 134                  | Control | -17.1961 | -6.6334 | -16.5437 | -4.4616 | -8.3032  | -1.8267  | -2.5704 |
| CHS 135                  | Cancer  | -16.6666 | -6.1941 | -15.7971 | -3.9261 | -6.5696  | -1.3372  | -1.7873 |
| CHS 136                  | Control | -16.6161 | -4.6385 | -15.1945 | -3.6357 | -5.9165  | 0.1667   | -2.1237 |
| CHS 137                  | Cancer  | -17.0279 | -6.0186 | -15.3792 | -4.3206 | -7.2624  | -0.6375  | -2.5865 |

| Sample ID Status  | NBN      | NOS3    | NPTX2    | PALB2   | PBX3    | PHB     | PHYH    |
|-------------------|----------|---------|----------|---------|---------|---------|---------|
| Confirmed in EDRN | v        |         |          |         |         |         |         |
| CHS 138 Control   | -17.3780 | -5.6100 | -15.5681 | -4.5659 | -6.9728 | -1.0350 | -2.7486 |
| CHS 139 Cancer    | -16.7777 | -4.6878 | -15.1009 | -3.3670 | -5.4215 | -0.6938 | -2.1916 |
| CHS 140 Control   | -17.0974 | -4.8560 | -15.8737 | -3.7787 | -6.3907 | -1.0730 | -2.6314 |
| CHS 141 Cancer    | -17.8685 | -5.1349 | -16.7148 | -3.7416 | -7.3425 | -1.2857 | -0.9651 |
| CHS 142 Control   | -18.1260 | -6.8864 | -16.4050 | -4.6956 | -7.4608 | -2.0561 | -3.3206 |
| CHS 143 Cancer    | -17.6491 | -5.1073 | -16.4444 | -3.5125 | -7.4230 | -1.9152 | -2.0885 |
| CHS 144 Control   | -17.3222 | -5.0503 | -14.9602 | -3.8775 | -5.7026 | -1.3898 | -2.5739 |
| CHS 145 Cancer    | -16.8965 | -6.9738 | -17.0890 | -5.3204 | -6.5245 | -1.4928 | -2.8258 |
| CHS 146 Control   | -16.8777 | -6.6970 | -16.6913 | -4.6695 | -6.5689 | -1.3194 | -3.1634 |
| CHS 147 Cancer    | -16.7493 | -5.4565 | -16.0660 | -3.3813 | -6.5248 | -0.8639 | -2.7005 |
| CHS 148 Control   | -17.5528 | -5.6155 | -15.6218 | -4.4704 | -7.1812 | -1.7344 | -2.9348 |
| CHS 149 Control   | -17.9303 | -6.6137 | -16.2468 | -3.7164 | -7.5909 | -2.1117 | -2.1700 |
| CHS 150 Cancer    | -17.7662 | -6.1070 | -16.3202 | -3.6881 | -7.0523 | -2.5001 | -2.1253 |
| CHS 151 Control   | -17.9580 | -5.9201 | -15.4825 | -3.9231 | -7.9996 | -1.1337 | -2.0577 |
| CHS 152 Cancer    | -17.8862 | -5.6690 | -16.4517 | -3.5702 | -7.6116 | -1.7062 | -2.3811 |
| CHS 153 Control   | -18.3102 | -6.6865 | -17.4390 | -5.4099 | -8.0963 | -2.4194 | -4.1126 |
| CHS 154 Cancer    | -17.6751 | -6.0703 | -15.7055 | -3.8859 | -6.8982 | -1.6169 | -2.6743 |
| CHS 155 Cancer    | -16.4248 | -5.4211 | -15.9982 | -2.9510 | -6.2465 | -1.1167 | -3.1146 |
| CHS 156 Control   | -17.5154 | -5.7886 | -16.3103 | -3.5694 | -7.1633 | -1.2951 | -3.0588 |
| CHS 157 Cancer    | -17.1847 | -7.4318 | -16.1967 | -5.2851 | -8.0311 | -2.6168 | -1.8573 |
| CHS 158 Control   | -16.2384 | -5.5383 | -14.9742 | -5.2464 | -6.8376 | -1.8911 | -2.4675 |
| CHS 159 Cancer    | -16.6816 | -6.7092 | -15.4419 | -3.0573 | -6.6371 | -1.1116 | -2.4834 |
| CHS 160 Control   | -16.6973 | -6.5507 | -16.2150 | -4.4790 | -7.1043 | -2.5733 | -3.6230 |
| EDRN 1 Early CRC  | 0.2951   | 0.3210  | 0.7674   |         | 0.6027  | 0.6632  | 0.3721  |
| EDRN 2 Early CRC  |          | -2.8221 |          |         | -0.8837 | 0.4964  | -2.6597 |
| EDRN 3 Early CRC  | 0.0195   | 0.2774  | -0.4450  |         | 0.1640  | 0.9646  | 0.1795  |
| EDRN 4 Early CRC  | -0.4416  | 0.5679  | 0.5108   |         | 1.0275  | 2.0908  | 0.0792  |
| EDRN 5 Late CRC   | 0.0155   | 0.4856  | -1.0244  |         | 1.0364  | 1.6144  | 1.3184  |
| EDRN 6 Late CRC   | -0.1716  | -0.3528 | -0.1380  |         | 0.3896  | 0.3457  |         |
| EDRN 7 Late CRC   | 0.2933   | 0.0656  | 0.1701   |         | 1.0650  | -0.2045 | 1.3409  |
| EDRN 8 Late CRC   | -0.5432  | 1.0508  | 0.2074   |         | 0.0605  |         | 0.4787  |
| EDRN 9 A-Adenoma  | 0.1363   | -1.1178 | 0.4703   |         | 0.3021  | 0.0889  | 0.0506  |
| EDRN 10 A-Adenoma | 0.2889   | -0.0554 | 0.6677   |         | 0.5048  | 0.4376  | -0.3012 |
| EDRN 11 A-Adenoma | 0.4585   | 3.2317  | 0.7233   |         | 0.6299  | 0.2241  | 0.3512  |
| EDRN 12 A-Adenoma | 0.9634   | 1.1938  | 0.7826   |         | 0.8811  | -0.1826 |         |
| EDRN 13 Adenomas  | -0.7117  | -0.6789 | -0.6219  |         | -0.0420 | -0.3900 | 0.2635  |
| EDRN 14 Adenomas  | 0.3649   | 0.5829  | -0.2746  |         | 2.6145  | -0.2753 | 0.6244  |
| EDRN 15 Adenomas  | 0.3875   | 0.2451  | -1.4375  |         | 0.6493  | -1.9323 | 0.9211  |
| EDRN 16 Adenomas  | 0.0044   | -0.5126 | -0.6707  |         | 1.0205  | 0.0280  | 0.9673  |
| EDRN 17 Sv normal | -0.0076  | 0.0690  | -0.8029  |         | -0.2261 | -2.7117 | 0.6136  |
| EDRN 18 Sv normal | 0.0623   | -0.1901 | 1.0827   |         | 0.4779  | -1.7854 | 0.6494  |
| EDRN 19 Sv normal | -0.0465  | -0.1476 | -0.1068  |         | 0.0321  | -0.3735 | 0.1645  |
| EDRN 20 Sv normal | 0.1443   | -1.2277 | 0.7290   |         | 0.7589  | 0.0010  | 1.6964  |
| EDRN 21 Sc normal | 0.2783   | -0.5797 | 1.0588   |         | 1.4110  | 0.9327  | 0.7322  |
| EDRN 22 Sc normal | 0.5044   | 0.8811  | 4.6985   |         | 0.6759  | 1.5326  |         |

| Sample ID                | Status    | NBN     | NOS3    | NPTX2   | PALB2 | PBX3    | PHB      | PHYH    |
|--------------------------|-----------|---------|---------|---------|-------|---------|----------|---------|
| <b>Confirmed in EDRN</b> |           |         |         |         |       |         | <b>v</b> |         |
| EDRN 23                  | Sc normal | 0.0004  | 1.2378  | 0.2148  |       | 0.4559  | 0.3916   | 1.2199  |
| EDRN 24                  | Sc normal | 0.0080  | 1.2807  | -0.0229 |       | 0.8289  | 0.5943   | 0.7104  |
| EDRN 25                  | Early CRC | 0.0514  | -1.8710 | -0.1994 |       | 0.8906  | 0.1851   | 1.4445  |
| EDRN 26                  | Early CRC | 1.0328  | -0.4960 | 0.2029  |       | 1.0518  |          | 0.7253  |
| EDRN 27                  | Early CRC | -1.7767 | -0.6352 | -0.8121 |       | -0.5983 | 0.2588   | 1.5506  |
| EDRN 28                  | Early CRC | 0.8893  | 0.8878  | 0.2931  |       | 0.9557  | 0.4842   | 0.7342  |
| EDRN 29                  | Late CRC  | 0.1169  | 0.1339  | 0.2905  |       | 0.5563  | 0.4045   | 1.2827  |
| EDRN 30                  | Late CRC  | 0.7175  | -0.3693 |         |       | 0.0226  | -1.6636  | 0.4479  |
| EDRN 31                  | Late CRC  | 0.1949  | 0.0903  | 0.1727  |       | 0.6371  | -0.6581  | 0.3491  |
| EDRN 32                  | Late CRC  | -0.1120 | 0.0311  | 0.5099  |       | 0.7035  | 0.2821   | 0.4043  |
| EDRN 33                  | A-Adenoma | 0.4284  | -0.4616 | 0.1692  |       | 0.8152  | -1.8703  | 0.6554  |
| EDRN 34                  | A-Adenoma | 0.5161  | 0.0574  | 0.1427  |       | 0.8342  | -0.2408  | 0.6904  |
| EDRN 35                  | A-Adenoma | 0.1729  | -0.0486 | 0.2550  |       | 0.7233  | -0.1919  | -0.4716 |
| EDRN 36                  | A-Adenoma | 0.3898  | -0.8693 | 3.4070  |       | 0.8536  | 0.3606   | -1.1083 |
| EDRN 37                  | Adenomas  | 0.3693  | 0.6388  | 0.6845  |       | 1.5315  | 0.8941   | -0.6810 |
| EDRN 38                  | Adenomas  | 0.5046  | 0.1008  |         |       | 1.6162  | 1.8024   |         |
| EDRN 39                  | Adenomas  | 0.2709  | 2.2875  | -0.3223 |       | 0.6121  | 1.2277   | 1.7309  |
| EDRN 40                  | Adenomas  | -2.2657 | -0.0270 | 1.0123  |       | -3.9778 | 0.6938   | 0.1528  |
| EDRN 41                  | Sv normal | 0.6817  | 1.8972  |         |       | 0.9681  | 0.8306   | -0.9170 |
| EDRN 42                  | Sv normal | 0.5120  |         | -0.6348 |       | 0.6449  | -0.3860  | 0.6696  |
| EDRN 43                  | Sv normal | 0.1081  | -0.3860 | -0.8157 |       | 1.5477  | 0.9648   | 0.3416  |
| EDRN 44                  | Sv normal | 0.4389  | 0.1164  | -0.1376 |       | 1.0616  | 0.2688   | 0.1565  |
| EDRN 45                  | Sc normal | 0.0306  | 1.5561  | 0.8713  |       | 1.2894  | 0.0529   | -0.3017 |
| EDRN 46                  | Sc normal | -1.4730 | 1.6543  | -0.7225 |       | 0.0497  | -0.0388  | 0.9048  |
| EDRN 47                  | Sc normal | -0.0999 | -0.7617 | 0.9696  |       | 0.5422  | -0.5463  | 1.3870  |
| EDRN 48                  | Sc normal | 0.7615  | 0.3567  | 0.6308  |       | 1.1057  | -0.5638  | 0.5128  |
| EDRN 49                  | Early CRC | 0.1074  | 0.5252  | 0.7997  |       | 0.7693  | 0.3536   | -0.6555 |
| EDRN 50                  | Early CRC | -1.7216 | -0.4314 | 0.2172  |       | -3.1723 | 0.0540   | -0.7659 |
| EDRN 51                  | Early CRC | 0.1472  | -0.7203 | 0.5134  |       | 0.6356  |          | -0.9653 |
| EDRN 52                  | Early CRC | 0.3432  | 0.1379  | 0.7546  |       | 1.1840  | 0.6564   |         |
| EDRN 53                  | Late CRC  | 0.2477  | 0.1980  | 0.8431  |       | 0.4886  | 1.5513   | 0.9082  |
| EDRN 54                  | Late CRC  | -0.2931 | 0.5337  | -0.0063 |       | 0.4413  |          | 0.1131  |
| EDRN 55                  | Late CRC  | 0.2589  | 0.7998  |         |       | 1.1960  |          | 0.0054  |
| EDRN 56                  | Late CRC  | 0.4614  | 0.1246  | 2.6101  |       | 0.8735  | 0.0759   | 0.7393  |
| EDRN 57                  | A-Adenoma | -0.0277 | -1.0110 |         |       | 0.8835  | -0.0124  | 0.2441  |
| EDRN 58                  | A-Adenoma | 0.2146  | 0.1973  | 0.5683  |       | 0.6107  | 1.1541   | 0.3697  |
| EDRN 59                  | A-Adenoma | 0.1639  | -1.5877 | 0.1276  |       | 0.6331  | 0.1913   | -0.4151 |
| EDRN 60                  | A-Adenoma | 0.0197  | 0.1160  | 0.8398  |       | 0.7438  | 0.5795   | -0.0937 |
| EDRN 61                  | Adenomas  | 0.1416  | -0.8276 | -0.1372 |       | 0.8559  | -0.8740  | 0.4577  |
| EDRN 62                  | Adenomas  | 0.4649  | 0.1224  | 0.2680  |       | 0.8872  | -1.0625  | 1.4955  |
| EDRN 63                  | Adenomas  | -0.0124 | -0.0898 | 0.9574  |       | 0.5228  |          | 1.1503  |
| EDRN 64                  | Adenomas  | 0.0712  | -0.0083 | 0.3546  |       | 0.9159  |          | 1.1140  |
| EDRN 65                  | Sv normal | -0.4902 | 1.3839  | -0.7264 |       | 0.4908  | -0.1874  | 1.0434  |
| EDRN 66                  | Sv normal | 0.0398  | 0.7253  | -0.4445 |       | 0.7140  |          | 1.2700  |
| EDRN 67                  | Sv normal | 0.0476  | 0.4809  | -0.0505 |       | 0.2446  | -0.4553  | 1.9017  |

| Sample ID                | Status    | NBN     | NOS3    | NPTX2   | PALB2 | PBX3    | PHB      | PHYH    |
|--------------------------|-----------|---------|---------|---------|-------|---------|----------|---------|
| <b>Confirmed in EDRN</b> |           |         |         |         |       |         | <b>v</b> |         |
| EDRN 68                  | Sv normal | 0.4752  | 0.8841  | -0.6112 |       | 0.9697  | -0.2478  | 0.9646  |
| EDRN 69                  | Sc normal |         | 0.0694  | 0.0248  |       | 0.9273  | 0.0795   | 0.6223  |
| EDRN 70                  | Sc normal | 0.8926  | 0.9150  | -0.2454 |       | 1.1698  | -0.3996  | 0.3709  |
| EDRN 71                  | Sc normal | 0.6498  | 0.7635  | -0.1979 |       | 0.9584  | 0.4829   |         |
| EDRN 72                  | Sc normal | 0.2670  | 0.5045  | -0.2012 |       | 0.4931  | -0.2219  | 0.4056  |
| EDRN 73                  | Early CRC | 0.4693  | 1.5839  | 1.3466  |       | -0.2087 | -0.3486  | 0.6922  |
| EDRN 74                  | Early CRC | 0.8111  | 1.2644  | -0.1634 |       | 0.8734  | -0.0264  | 1.0688  |
| EDRN 75                  | Early CRC | 0.9539  | 1.2674  | 0.1244  |       | 1.4655  | 1.2991   | 0.3930  |
| EDRN 76                  | Early CRC | 1.0342  | 1.7016  | 2.0250  |       | 0.6153  | 0.0951   | 1.7625  |
| EDRN 77                  | Late CRC  | 0.3658  | -0.3771 | 0.6976  |       | 0.9196  |          | 0.7499  |
| EDRN 78                  | Late CRC  | 0.6068  | 0.3752  | 0.8296  |       | 1.2481  | -0.0661  | 1.5031  |
| EDRN 79                  | Late CRC  | 0.5721  | 0.4473  | 0.7268  |       | 1.8621  | 0.8022   | 0.9298  |
| EDRN 80                  | Late CRC  | 0.2045  | 0.5489  | 0.8648  |       | 2.0442  | 0.9372   | 0.2411  |
| EDRN 81                  | A-Adenoma | 0.2591  | 1.4934  | 0.3328  |       | 1.3041  | 0.5589   | 0.0925  |
| EDRN 82                  | A-Adenoma | 0.8511  | 1.7080  | 0.2667  |       | 1.8056  | 1.3724   | 1.6604  |
| EDRN 83                  | A-Adenoma | -0.0824 | 0.9141  | 0.3074  |       | 1.4711  |          | 0.9756  |
| EDRN 84                  | A-Adenoma | 0.3943  | -0.2581 | -0.3276 |       | 0.1620  | -0.1939  | -0.0237 |
| EDRN 85                  | Adenomas  | 0.9592  | -0.1831 | -0.0820 |       | 0.9128  | -0.2192  |         |
| EDRN 86                  | Adenomas  | 0.1900  | 1.3267  | -0.0927 |       | 1.3073  | 0.2255   | 0.2227  |
| EDRN 87                  | Adenomas  | 0.1503  | -0.0028 | 0.3896  |       | 1.1361  | -0.6870  | 1.2412  |
| EDRN 88                  | Adenomas  | 0.2921  | 0.6107  | 0.1425  |       | 1.1065  |          | -0.5684 |
| EDRN 89                  | Sv normal | -0.5925 | -1.9843 | -0.2433 |       | -0.9488 | -0.8465  | -1.1378 |
| EDRN 90                  | Sv normal |         | -0.0731 | 0.3353  |       | 0.1802  | -0.3060  | 0.4618  |
| EDRN 91                  | Sv normal | 0.4640  | -1.2133 |         |       | 0.3555  | -0.5433  | -0.7271 |
| EDRN 92                  | Sv normal | -0.1082 | -0.3928 | -0.8268 |       | 0.4472  | -1.0307  | 0.1260  |
| EDRN 93                  | Sc normal | -0.0537 | -0.5572 | -0.3820 |       | 0.0101  | -0.3563  | -1.0803 |
| EDRN 94                  | Sc normal |         | 0.5202  | -0.4086 |       | -0.3753 | 1.0128   | 0.6778  |
| EDRN 95                  | Sc normal | 0.1738  | -0.5690 | 0.5620  |       | 0.6421  | 0.5896   | -0.4581 |
| EDRN 96                  | Sc normal | -5.4377 | -4.3454 | 0.1034  |       | -3.8993 | -0.2020  | 1.8577  |
| EDRN 97                  | Early CRC | 0.2166  | 1.1869  | 0.6329  |       | 0.6963  | -0.0424  | 1.2097  |
| EDRN 98                  | Early CRC | 0.4442  | 1.7994  | -0.0717 |       | 0.8248  | -0.4633  | 0.6805  |
| EDRN 99                  | Early CRC | 0.6532  | 1.1846  | 0.4716  |       | 0.1355  | -0.4978  | 1.5320  |
| EDRN 100                 | Early CRC | 0.5783  | 1.6599  | -0.3543 |       | 0.8575  | 0.2097   | 0.8849  |
| EDRN 101                 | Late CRC  | -0.0911 | -0.3260 | 0.4417  |       | 0.5881  | 0.3377   | -0.8426 |
| EDRN 102                 | Late CRC  | 0.4733  | 0.2600  | 0.4961  |       | 1.4035  |          | 0.3007  |
| EDRN 103                 | Late CRC  | -0.1912 | -1.5600 | 0.7117  |       | -0.3482 | -0.5636  | -0.1576 |
| EDRN 104                 | Late CRC  | -0.3246 | -0.5952 | -0.6843 |       | 0.0803  |          | -0.7019 |
| EDRN 105                 | A-Adenoma | 0.0846  | 0.0191  | 0.0857  |       | 0.7644  | 0.2182   |         |
| EDRN 106                 | A-Adenoma | 0.2179  | 1.4350  | 0.0243  |       | 0.6256  | 0.8370   | 0.4968  |
| EDRN 107                 | A-Adenoma | -0.1596 | -0.2728 | 0.2129  |       | 0.5784  | 0.0786   | 0.1926  |
| EDRN 108                 | A-Adenoma | 0.1548  | 1.8530  | 0.1558  |       | 0.9133  |          | 0.6451  |
| EDRN 109                 | Adenomas  | 0.1703  | 1.7386  | -0.2581 |       | 0.7917  | 1.0410   | 1.4592  |
| EDRN 110                 | Adenomas  | -0.0710 | -0.2119 | 0.5841  |       | -0.6969 | -0.6349  | -1.5239 |
| EDRN 111                 | Adenomas  | 0.5620  | 0.6158  | 0.1060  |       | 1.3539  | 1.0663   | 0.7528  |
| EDRN 112                 | Adenomas  | -2.1578 | -3.4342 | 0.7410  |       | 0.6177  |          | 2.3862  |

| Sample ID                | Status    | NBN     | NOS3    | NPTX2   | PALB2 | PBX3    | PHB      | PHYH    |
|--------------------------|-----------|---------|---------|---------|-------|---------|----------|---------|
| <b>Confirmed in EDRN</b> |           |         |         |         |       |         | <b>v</b> |         |
| EDRN 113                 | Sv normal | 0.0745  | 0.5199  | 0.1159  |       | 0.6297  | 0.7554   | 0.5227  |
| EDRN 114                 | Sv normal | 0.3937  | 0.4558  | 0.5822  |       | 0.9780  | 0.0520   | 0.2491  |
| EDRN 115                 | Sv normal |         | -0.2855 | 0.4573  |       | 0.6936  | -0.3488  | 0.0762  |
| EDRN 116                 | Sv normal | 0.1154  | -1.4326 | 0.6128  |       | 0.8224  |          | 0.3339  |
| EDRN 117                 | Sc normal | 0.5130  | -0.2807 | 0.4430  |       | 0.0947  | -0.7628  | 0.3013  |
| EDRN 118                 | Sc normal | 0.2872  | 0.1376  | -0.0040 |       | 0.6595  |          | 0.4028  |
| EDRN 119                 | Sc normal | 0.2507  | 0.2262  | 0.2366  |       | 0.9254  | 0.3166   | 1.2025  |
| EDRN 120                 | Sc normal | 0.2744  | -0.8873 | 1.0804  |       | 0.4477  | 0.4956   | 0.2577  |
| EDRN 121                 | Early CRC | 0.4418  | 1.6892  | 0.3942  |       | 0.3200  | 1.0315   | 1.5267  |
| EDRN 122                 | Early CRC | -0.2256 | -0.0922 | 0.2740  |       | 0.3633  | 0.1649   | -0.5587 |
| EDRN 123                 | Early CRC | 0.5234  | 0.7063  | 0.3728  |       | 0.6400  | 0.0954   | 0.7147  |
| EDRN 124                 | Early CRC | 0.0719  | 0.8563  | 1.3556  |       | 0.2006  | -1.0058  | 0.7607  |
| EDRN 125                 | Late CRC  | 0.2609  | -0.0918 | 0.3898  |       | 0.4271  | -0.2196  | 1.1065  |
| EDRN 126                 | Late CRC  | -0.1749 | -0.0649 | -0.2235 |       | 0.1594  | -0.9674  | -0.1756 |
| EDRN 127                 | Late CRC  | 0.6766  | 0.9467  | 0.1969  |       | 1.1026  | 0.4060   | 0.9817  |
| EDRN 128                 | Late CRC  | 0.2273  | 1.2314  | -0.1766 |       | 0.3505  | -0.2747  | 0.9849  |
| EDRN 129                 | A-Adenoma | 0.4998  | 0.6906  | 0.0785  |       | 1.2853  | -0.2028  |         |
| EDRN 130                 | A-Adenoma | 0.1400  | 0.5277  | 0.5764  |       | 0.5742  | -1.1027  | 0.8764  |
| EDRN 131                 | A-Adenoma | 0.2713  | 0.1625  | 0.0357  |       | 1.0122  | 0.8391   | 1.1139  |
| EDRN 132                 | A-Adenoma | 0.0415  | -0.3965 | 0.2713  |       | 0.6527  | 2.1380   | 1.1975  |
| EDRN 133                 | Adenomas  | 0.0425  | -1.4575 | 0.1714  |       | 0.1076  | -0.0799  | -0.3955 |
| EDRN 134                 | Adenomas  | -0.2215 | -0.8113 | 0.6212  |       | 0.8546  |          | 0.2019  |
| EDRN 135                 | Adenomas  | -0.2210 | 0.1722  | -0.4977 |       | 0.7509  | 0.8013   | 1.3239  |
| EDRN 136                 | Adenomas  | -0.7138 | 2.3019  | -0.7112 |       | -1.2798 | 0.4564   | -1.4530 |
| EDRN 137                 | Sv normal | -0.2719 | -1.1689 | 0.9024  |       | 0.7102  |          | 0.3840  |
| EDRN 138                 | Sv normal | -0.3583 | -1.0767 | 0.6836  |       | 1.2557  | -0.1296  | -0.4678 |
| EDRN 139                 | Sv normal | -0.3845 | 0.6140  | 0.0861  |       | -0.7381 | 0.6433   | 0.0643  |
| EDRN 140                 | Sv normal | 0.2635  | -0.8367 | 0.5798  |       | 1.2636  |          | 0.4732  |
| EDRN 141                 | Sc normal | -0.3010 | -0.0711 | 0.4185  |       | 0.5475  | -0.3555  | 0.5842  |
| EDRN 142                 | Sc normal | 2.2053  | 0.4336  | 0.1898  |       | 3.5707  | -0.2062  | 0.1261  |
| EDRN 143                 | Sc normal | -0.0703 | -1.0868 | 0.8296  |       | -0.1539 | 0.2336   | 1.5064  |
| EDRN 144                 | Sc normal | -0.2626 | 0.6276  | 0.0010  |       | 0.4598  | 0.5552   | -0.2156 |
| EDRN 145                 | Early CRC | 0.5237  | 0.9247  | -0.2250 |       | 0.3219  | 0.9044   | 0.4561  |
| EDRN 146                 | Early CRC | 0.3029  | 0.7322  | 0.3088  |       | 0.5549  | -1.0694  | -0.1643 |
| EDRN 147                 | Early CRC | 0.1881  | 1.5254  | 0.3426  |       | 0.9083  | -0.0830  | 0.6386  |
| EDRN 148                 | Early CRC | 0.3483  | 0.8130  | 0.1394  |       | 0.9903  | 0.6407   | 0.2211  |
| EDRN 149                 | Late CRC  | 0.0415  | 0.0890  | 0.4577  |       | 1.0138  | 1.1151   | 0.9701  |
| EDRN 150                 | Late CRC  | 0.6280  | 0.2947  | 0.0543  |       | 1.0276  | 1.4520   | 1.0515  |
| EDRN 151                 | Late CRC  | 0.2223  | 0.9123  | -0.9478 |       | 0.7509  | 0.5796   | 0.7770  |
| EDRN 152                 | Late CRC  | 0.2448  | -0.1972 | 0.3174  |       | 0.8555  | 0.5330   | 0.7860  |
| EDRN 153                 | A-Adenoma | -0.6583 | 0.8128  |         |       | 0.4898  | -0.7058  | 0.8630  |
| EDRN 154                 | A-Adenoma | 0.0986  | -0.2145 |         |       | 0.3836  | -0.5008  | -0.1943 |
| EDRN 155                 | A-Adenoma | 0.5298  | 0.8512  | -1.4310 |       | 1.1444  | 1.2777   | 0.9693  |
| EDRN 156                 | A-Adenoma | 0.3755  | 0.3070  | 0.9044  |       | 0.6104  |          | 0.9506  |
| EDRN 157                 | Adenomas  | 0.4343  | 0.6180  | 0.9439  |       | 0.5588  | 0.4796   | 0.9101  |

| Sample                   | ID  | Status    | NBN     | NOS3    | NPTX2   | PALB2 | PBX3    | PHB      | PHYH    |
|--------------------------|-----|-----------|---------|---------|---------|-------|---------|----------|---------|
| <b>Confirmed in EDRN</b> |     |           |         |         |         |       |         | <b>v</b> |         |
| EDRN                     | 158 | Adenomas  | 0.3998  | -1.5400 | -0.0094 |       | 2.6993  | 1.3128   | -0.4019 |
| EDRN                     | 159 | Adenomas  | -0.6792 | 0.7428  | -0.2118 |       | -0.8104 | 0.6341   | 1.0831  |
| EDRN                     | 160 | Adenomas  | -0.6762 | -0.6191 | 0.5501  |       | 0.0796  | -0.6502  | -0.5760 |
| EDRN                     | 161 | Sv normal | -0.6614 | -0.3300 | -0.4359 |       | -0.4523 | 0.5570   | 0.0423  |
| EDRN                     | 162 | Sv normal | -0.3327 | -0.6944 | 0.8962  |       | 1.0460  | -1.6244  | 0.4735  |
| EDRN                     | 163 | Sv normal | -0.2148 | -1.1837 | 0.0933  |       | -1.5222 | -1.7504  | 0.7703  |
| EDRN                     | 164 | Sv normal | -0.1815 | -1.0425 | 0.4671  |       | 0.5960  | -1.5515  | 0.6426  |
| EDRN                     | 165 | Sc normal | 0.1648  | -0.5834 | 0.3343  |       | 0.7627  | -0.2633  | -0.2922 |
| EDRN                     | 166 | Sc normal | 0.9608  | 0.7499  | 1.8312  |       | 1.7509  | 0.5954   | 1.6666  |
| EDRN                     | 167 | Sc normal | 0.0282  | -0.4370 | 0.9775  |       | 0.2243  | 0.7094   | -0.6514 |
| EDRN                     | 168 | Sc normal | 0.3733  | 1.2741  | 0.9010  |       | 0.4528  | -0.0415  | 0.1765  |
| EDRN                     | 169 | Early CRC | 0.7347  | -0.1412 | 2.2637  |       | 0.0960  | 0.3237   | 1.8155  |
| EDRN                     | 170 | Early CRC | -0.1035 | -0.4642 | 0.0647  |       | 0.5243  | -0.0188  | 0.9287  |
| EDRN                     | 171 | Late CRC  | 0.0729  | -0.3653 | 0.1619  |       | 0.2584  | -0.1511  | 0.7979  |
| EDRN                     | 172 | Late CRC  | 0.1491  | 3.9932  | 0.2929  |       | 1.7431  | 0.6356   | 1.5695  |
| EDRN                     | 173 | A-Adenoma | 1.1395  | -0.9629 | -0.1921 |       | 0.4843  | 1.1386   | 0.3799  |
| EDRN                     | 174 | A-Adenoma |         | 0.6225  | 0.2487  |       | 0.9339  | -0.6614  | 0.8441  |
| EDRN                     | 175 | Adenomas  | 0.4983  | -0.2419 | -0.4080 |       | 0.8789  | 0.8788   | -0.6078 |
| EDRN                     | 176 | Adenomas  | 0.1442  | 0.5172  | 0.0664  |       | 0.7444  | 1.0834   | 1.2492  |
| EDRN                     | 177 | Sv normal | 0.7458  | -0.2163 | -0.0171 |       | 1.2173  | 0.7713   | 1.1709  |
| EDRN                     | 178 | Sv normal | 0.3591  | -0.5261 | 0.2743  |       | 0.3428  | -0.9275  | -0.4547 |
| EDRN                     | 179 | Sc normal | -2.7563 | 0.2487  | 0.1093  |       | -1.3341 | -1.5221  | -1.6386 |
| EDRN                     | 180 | Sc normal | 0.0885  | -0.5609 | 0.5447  |       | 1.3290  | -0.1541  | -0.4703 |



| Sample ID         | Status  | PIK3CA | PRL      | RAB7L1 | RAC1    | RAC1    | SELP    | SERPING1 |
|-------------------|---------|--------|----------|--------|---------|---------|---------|----------|
| Confirmed in EDRN |         | v      | v        | v      |         |         |         |          |
| CHS 1             | Control | 8.3178 | -27.1318 | 5.8560 | -3.1548 | -0.9694 | 0.4500  | -4.7670  |
| CHS 2             | Cancer  | 7.0099 | -26.1399 | 5.1224 | -4.5673 | -2.4477 | -1.8038 | -6.3167  |
| CHS 3             | Cancer  | 8.0031 | -26.2886 | 4.6366 | -1.6495 | -1.8376 | 1.5537  | -5.0076  |
| CHS 4             | Control | 6.7508 | -27.8804 | 5.6276 | -3.2688 | -3.5325 | -2.7750 | -6.9201  |
| CHS 5             | Control | 9.1242 | -25.9407 | 2.8026 | -1.5366 | -1.3608 | 0.0174  | -5.5558  |
| CHS 6             | Cancer  | 7.8774 | -25.2262 | 5.8002 | -3.5880 | -2.9748 | 0.5311  | -5.1275  |
| CHS 7             | Control | 8.3215 | -26.1256 | 4.3554 | -1.6065 | -3.5298 | -0.4975 | -6.4825  |
| CHS 8             | Cancer  | 8.1119 | -25.9024 | 4.1886 | -1.6257 | -2.0098 | -0.5055 | -5.6435  |
| CHS 9             | Cancer  | 8.9798 | -25.7002 | 5.6581 | -2.9627 | -2.5352 | -0.0474 | -5.0954  |
| CHS 10            | Control | 8.2741 | -26.1368 | 4.8479 | -2.7270 | -2.1842 | -1.2046 | -5.8475  |
| CHS 11            | Control | 8.3989 | -27.4422 | 5.6429 | -3.1920 | -4.9039 | -3.2036 | -8.5124  |
| CHS 12            | Cancer  | 9.6242 | -26.5857 | 5.6336 | -3.3760 | -2.0233 | -0.6771 | -5.8485  |
| CHS 13            | Cancer  | 9.4943 | -28.9079 | 5.0523 | -0.8618 | -0.3788 | -0.9138 | -4.5664  |
| CHS 14            | Control | 7.8289 | -27.4279 | 4.8480 | -3.5705 | -2.1911 | -2.8387 | -6.1692  |
| CHS 15            | Control | 9.0626 | -28.0459 | 4.8792 | -3.0504 | -2.6974 | -2.4345 | -5.9650  |
| CHS 16            | Cancer  | 9.3644 | -27.2950 | 5.1257 | -3.4015 | -3.2195 | -0.2538 | -5.8629  |
| CHS 17            | Cancer  | 8.6807 | -26.0092 | 3.6314 | -0.7206 | -0.5304 | 2.4071  | -5.3350  |
| CHS 18            | Control | 7.9213 | -27.5389 | 2.7840 | -3.0819 | -0.5402 | -1.3706 | -5.7210  |
| CHS 19            | Cancer  | 9.4550 | -27.4048 | 4.8133 | -3.2247 | -3.1220 | -3.2508 | -6.2457  |
| CHS 20            | Control | 8.3456 | -28.3779 | 4.2140 | -4.0395 | -3.2535 | -1.0272 | -7.7430  |
| CHS 21            | Cancer  | 7.8389 | -27.7030 | 5.3063 | -0.4507 | -1.3828 | -0.2100 | -5.2990  |
| CHS 22            | Control | 7.8910 | -26.5918 | 3.3179 | -3.4233 | -3.3702 | -1.3950 | -7.0049  |
| CHS 23            | Cancer  | 8.7297 | -26.8381 | 3.5394 | -0.6528 | -0.4258 | 1.8428  | -4.4473  |
| CHS 24            | Control | 3.9463 | -28.4798 | 3.0783 | -4.5496 | -4.9242 | -3.4092 | -9.8709  |
| CHS 25            | Cancer  | 8.3893 | -26.2186 | 5.6301 | -3.1878 | -3.3517 | -0.6619 | -5.5331  |
| CHS 26            | Control | 7.7507 | -28.0500 | 4.6374 | -2.1875 | -2.1535 | -0.8042 | -5.3867  |
| CHS 27            | Cancer  | 6.9593 | -27.1461 | 4.2969 | -2.5696 | -2.0582 | -1.4307 | -5.2003  |
| CHS 28            | Control | 9.3296 | -27.0131 | 4.8524 | -2.9141 | -2.0965 | 0.3821  | -4.7941  |
| CHS 29            | Cancer  | 8.7801 | -28.0410 | 5.2845 | -1.9664 | -1.8424 | -0.6434 | -6.0948  |
| CHS 30            | Control | 8.1301 | -27.6919 | 4.7398 | -2.7835 | -1.9296 | -2.3970 | -5.6970  |
| CHS 31            | Control | 7.9668 | -26.7408 | 4.7523 | -3.1544 | -1.9277 | 0.2846  | -5.8982  |
| CHS 32            | Cancer  | 8.5091 | -26.6056 | 4.7603 | -2.7550 | -2.0969 | -0.2838 | -6.0434  |
| CHS 33            | Cancer  | 8.5080 | -27.4477 | 4.2308 | -3.0688 | -1.3250 | -0.3840 | -4.7864  |
| CHS 34            | Control | 7.4962 | -28.4312 | 3.7116 | -1.9698 | -1.7099 | -1.6439 | -6.0674  |
| CHS 35            | Control | 7.0327 | -25.7402 | 6.1739 | -3.3216 | -2.9119 | -0.7098 | -6.5537  |
| CHS 36            | Cancer  | 8.6442 | -27.4270 | 3.6371 | -2.9611 | -2.4021 | -0.5350 | -6.1457  |
| CHS 37            | Cancer  | 7.4049 | -26.5156 | 4.9947 | -3.4830 | -2.6043 | -1.5327 | -6.1889  |
| CHS 38            | Control | 7.5834 | -26.4858 | 4.6208 | -3.2863 | -3.8569 | -1.4835 | -6.3887  |
| CHS 39            | Control | 7.2897 | -25.9260 | 5.0095 | -3.2535 | -1.7285 | -1.1971 | -8.0944  |
| CHS 40            | Cancer  | 8.8672 | -26.2702 | 4.1861 | -1.9054 | -2.0577 | -0.1467 | -6.1288  |
| CHS 41            | Control | 7.7580 | -28.1129 | 3.9087 | -3.1207 | -2.2743 | -0.9977 | -6.7142  |
| CHS 42            | Cancer  | 8.4588 | -26.1598 | 4.8050 | -2.5264 | -3.7853 | -1.2602 | -6.5310  |
| CHS 43            | Control | 9.2275 | -27.5888 | 5.0604 | -2.9553 | -2.3861 | -1.3942 | -6.7644  |
| CHS 44            | Cancer  | 8.5622 | -26.6237 | 4.6053 | -1.9392 | -2.9706 | -1.7684 | -5.9293  |
| CHS 45            | Control | 7.9975 | -26.8492 | 4.3715 | -2.4992 | -2.0945 | -1.9489 | -6.5754  |

| Sample ID         | Status  | PIK3CA  | PRL      | RAB7L1 | RAC1    | RAC1    | SELP    | SERPING1 |
|-------------------|---------|---------|----------|--------|---------|---------|---------|----------|
| Confirmed in EDRN |         | v       | v        | v      |         |         |         |          |
| CHS 46            | Cancer  | 9.3988  | -26.5842 | 4.6089 | -1.8643 | -1.5272 | 0.9018  | -5.3637  |
| CHS 47            | Cancer  | 8.9113  | -26.7530 | 3.8961 | -2.4047 | -2.7200 | -0.1136 | -6.2067  |
| CHS 48            | Control | 8.3965  | -26.6984 | 3.9879 | -2.2043 | -2.5340 | -1.2480 | -6.2683  |
| CHS 49            | Cancer  | 9.2196  | -26.5036 | 6.3019 | -2.1640 | -2.8126 | -1.2426 | -6.8584  |
| CHS 50            | Control | 6.9634  | -27.1248 | 5.1015 | -2.9438 | -3.1324 | -0.2562 | -6.4954  |
| CHS 51            | Cancer  | 10.0638 | -26.2244 | 6.0694 | -2.3115 | -2.5806 | -1.5702 | -6.5916  |
| CHS 52            | Control | 7.1286  | -28.0411 | 4.1299 | -3.6490 | -2.6287 | -1.1664 | -6.6899  |
| CHS 53            | Control | 8.1011  | -28.8288 | 3.0538 | -3.9852 | -2.2128 | -0.3694 | -5.9286  |
| CHS 54            | Cancer  | 9.6388  | -25.5696 | 6.2513 | -3.1452 | -2.9747 | -0.1953 | -6.0229  |
| CHS 55            | Cancer  | 8.7887  | -27.2024 | 4.8108 | -2.4657 | -2.8055 | -1.7094 | -6.5853  |
| CHS 56            | Control | 9.6368  | -28.6958 | 3.0391 | -2.9680 | -2.2259 | -2.7504 | -6.4038  |
| CHS 57            | Control | 8.2086  | -27.5472 | 3.9510 | -3.1880 | -1.7170 | -0.9666 | -7.0436  |
| CHS 58            | Cancer  | 9.5194  | -27.1440 | 2.5399 | -2.4870 | -2.9304 | -0.6213 | -6.1143  |
| CHS 59            | Cancer  | 8.8335  | -27.5016 | 4.2001 | -3.5258 | -2.0454 | -1.3188 | -6.2700  |
| CHS 60            | Control | 7.9777  | -25.8839 | 4.5020 | -3.0119 | -2.9976 | -0.4776 | -6.2038  |
| CHS 61            | Cancer  | 7.2181  | -23.5868 | 4.5620 | -3.7560 | -2.6119 | -1.0444 | -5.9440  |
| CHS 62            | Control | 6.2488  | -29.1381 | 3.9225 | -3.3507 | -2.6323 | -0.7878 | -8.0473  |
| CHS 63            | Cancer  | 8.7869  | -24.9005 | 4.9913 | -1.3926 | -1.4641 | 0.1094  | -4.6814  |
| CHS 64            | Control | 7.6630  | -27.7971 | 4.3751 | -3.9936 | -2.0835 | -0.2950 | -5.9347  |
| CHS 65            | Cancer  | 8.8784  | -25.7032 | 5.3830 | -1.7803 | -1.4027 | 1.5565  | -2.2762  |
| CHS 66            | Control | 8.4442  | -25.5160 | 4.8730 | -1.4039 | -1.0681 | 0.2757  | -4.9757  |
| CHS 67            | Control | 6.8748  | -27.2373 | 5.0431 | -3.4977 | -2.5274 | -1.8433 | -7.9842  |
| CHS 68            | Cancer  | 7.5332  | -27.7998 | 4.8607 | -2.4507 | -2.4865 | -0.7586 | -6.5995  |
| CHS 69            | Cancer  | 7.8939  | -27.3629 | 5.4667 | -2.6100 | -2.2069 | -1.9439 | -5.1583  |
| CHS 70            | Control | 8.0978  | -27.3557 | 5.1094 | -2.0312 | -2.2384 | -1.9142 | -4.3737  |
| CHS 71            | Cancer  | 6.9457  | -27.7023 | 4.2566 | -2.3603 | -2.4493 | -0.9854 | -6.1003  |
| CHS 72            | Control | 8.6876  | -26.7537 | 3.9680 | 0.1899  | -2.1100 | -0.7412 | -6.0718  |
| CHS 73            | Control | 7.7489  | -26.8135 | 4.8538 | -4.7210 | -3.6051 | -1.5654 | -7.3047  |
| CHS 74            | Cancer  | 8.3934  | -27.6275 | 5.6710 | -2.2390 | -0.7997 | -0.0701 | -4.5817  |
| CHS 75            | Cancer  | 8.3595  | -26.7802 | 5.7713 | -3.2420 | -2.0879 | 0.0817  | -5.7286  |
| CHS 76            | Control | 8.1208  | -27.9227 | 4.7450 | -3.6506 | -2.7067 | -1.2077 | -6.7111  |
| CHS 77            | Control | 6.4893  | -28.3538 | 4.1863 | -2.3805 | -2.1830 | -1.6252 | -7.0739  |
| CHS 78            | Cancer  | 8.1774  | -26.9580 | 4.2863 | -1.0902 | -1.7232 | -0.9701 | -5.2339  |
| CHS 79            | Cancer  | 10.0482 | -25.4976 | 5.1097 | -2.5089 | -1.7570 | -0.0637 | -5.3637  |
| CHS 80            | Control | 8.7085  | -24.9092 | 4.3895 | -1.7768 | -1.8477 | -0.6549 | -6.1333  |
| CHS 81            | Control | 8.3660  | -26.2476 | 5.0898 | -3.0451 | -2.5301 | -0.8134 | -6.7549  |
| CHS 82            | Cancer  | 7.6982  | -26.5889 | 4.5962 | -2.7969 | -2.6650 | -1.4651 | -5.7155  |
| CHS 83            | Cancer  | 8.4682  | -26.8067 | 4.2533 | -2.8335 | -2.0605 | -0.9797 | -5.6845  |
| CHS 84            | Control | 7.5844  | -27.5424 | 3.9982 | -4.7904 | -2.6092 | 0.0644  | -5.4773  |
| CHS 85            | Cancer  | 8.9894  | -26.7521 | 3.8820 | -2.0882 | -2.0472 | -0.5105 | -6.3917  |
| CHS 86            | Control | 7.6483  | -27.2997 | 3.6675 | -2.7659 | -3.8662 | -1.6826 | -7.0912  |
| CHS 87            | Control | 7.2470  | -27.4061 | 5.3758 | -4.7549 | -2.9994 | -0.1880 | -7.1151  |
| CHS 88            | Cancer  | 7.4987  | -27.2299 | 4.5564 | -1.8644 | -2.8975 | -1.4581 | -5.7115  |
| CHS 89            | Control | 8.6212  | -27.1387 | 5.4355 | -1.7890 | -2.7069 | -0.1065 | -6.1183  |
| CHS 90            | Cancer  | 9.0691  | -26.7056 | 4.2405 | -2.7678 | -1.8351 | -0.5958 | -5.4050  |

| Sample ID Status  | PIK3CA  | PRL      | RAB7L1 | RAC1    | RAC1    | SELP    | SERPING1 |
|-------------------|---------|----------|--------|---------|---------|---------|----------|
| Confirmed in EDRN | v       | v        | v      |         |         |         |          |
| CHS 91 Cancer     | 9.5129  | -26.4142 | 5.1598 | -3.3749 | -1.9227 | -1.2473 | -5.7105  |
| CHS 92 Control    | 8.1965  | -27.3079 | 4.5855 | -2.4547 | -2.7184 | -1.2855 | -5.9295  |
| CHS 93 Control    | 8.3685  | -27.0995 | 4.2192 | -3.5962 | -2.7938 | -1.7307 | -6.5206  |
| CHS 94 Cancer     | 7.1993  | -26.8143 | 5.0395 | -0.8452 | -2.5170 | -1.0387 | -5.5982  |
| CHS 95 Control    | 8.8235  | -27.2541 | 4.8112 | -1.8171 | -1.9445 | -1.0257 | -5.7805  |
| CHS 96 Cancer     | 8.0151  | -27.6504 | 2.8385 | -1.0888 | -1.5210 | -0.8775 | -6.2193  |
| CHS 97 Cancer     | 9.1067  | -27.1598 | 4.9450 | -2.1741 | -2.0762 | -1.0223 | -6.9864  |
| CHS 98 Control    | 8.1066  | -27.6824 | 4.1993 | -1.4742 | -2.3227 | -1.1040 | -8.3926  |
| CHS 99 Cancer     | 8.3397  | -26.7319 | 5.3890 | -0.9840 | -2.1048 | -0.8834 | -5.9382  |
| CHS 100 Control   | 10.1978 | -26.8795 | 4.9248 | -3.1142 | -4.2946 | -0.2029 | -5.8307  |
| CHS 101 Cancer    | 8.8257  | -27.4234 | 5.3242 | -1.4940 | -2.2979 | -1.2072 | -5.9240  |
| CHS 102 Control   | 8.3375  | -27.3153 | 3.5874 | -1.5169 | -1.1763 | -0.5726 | -5.0939  |
| CHS 103 Cancer    | 8.6406  | -27.5789 | 4.4555 | -2.1581 | -0.9337 | 0.3565  | -5.5935  |
| CHS 104 Control   | 8.3306  | -26.2843 | 5.5547 | -4.3129 | -3.6255 | -1.5309 | -6.6344  |
| CHS 105 Cancer    | 7.5481  | -27.4523 | 4.0262 | -2.8957 | -1.1535 | -1.2094 | -4.6971  |
| CHS 106 Control   | 7.5420  | -27.9008 | 4.8652 | -3.5074 | -3.1268 | -3.2540 | -6.8500  |
| CHS 107 Cancer    | 8.5980  | -27.3518 | 4.6370 | -1.6680 | -2.5740 | -1.1610 | -7.1642  |
| CHS 108 Control   | 9.4625  | -26.4051 | 5.0399 | -3.0979 | -1.7300 | -0.8199 | -5.7014  |
| CHS 109 Control   | 6.3727  | -27.3797 | 3.9975 | -3.4944 | -2.8946 | -0.8613 | -5.5618  |
| CHS 110 Cancer    | 7.5168  | -27.5000 | 4.5318 | -2.9388 | -2.4717 | -1.8334 | -6.8547  |
| CHS 111 Control   | 6.9802  | -27.9993 | 3.9690 | -3.4526 | -2.8806 | -1.5311 | -5.9865  |
| CHS 112 Cancer    | 9.1095  | -23.3227 | 5.9181 | -3.0114 | -2.9056 | 0.6912  | -5.3875  |
| CHS 113 Control   | 8.7220  | -27.3794 | 4.1739 | -2.5150 | -1.2098 | 1.2007  | -4.7236  |
| CHS 114 Cancer    | 7.4682  | -27.5793 | 4.4880 | -3.2517 | -2.3678 | -0.5296 | -6.2734  |
| CHS 117 Control   | 8.0956  | -26.5650 | 3.7184 | -2.9507 | -2.1268 | -1.1350 | -6.0418  |
| CHS 118 Cancer    | 7.9136  | -25.9565 | 4.5657 | -3.1792 | -2.7850 | -1.1412 | -5.8267  |
| CHS 119 Cancer    | 7.8299  | -26.4235 | 3.9573 | -2.5445 | -2.2637 | -0.7055 | -6.0781  |
| CHS 120 Control   | 7.8619  | -26.9233 | 5.2636 | -3.1897 | -2.3278 | -0.8086 | -5.7012  |
| CHS 121 Control   | 7.9153  | -26.5118 | 5.9281 | -4.1062 | -3.1898 | -0.4751 | -6.2694  |
| CHS 122 Cancer    | 8.6550  | -26.2412 | 5.3242 | -2.9131 | -2.9584 | -0.4540 | -5.9852  |
| CHS 123 Cancer    | 7.7163  | -28.3202 | 4.5846 | -3.1796 | -1.8284 | -0.4664 | -6.4514  |
| CHS 124 Control   | 7.9817  | -27.7415 | 3.7129 | -3.1651 | -1.2282 | -0.9055 | -6.2639  |
| CHS 125 Cancer    | 7.1171  | -27.3016 | 4.8141 | -3.3957 | -2.3691 | -0.4938 | -6.2685  |
| CHS 126 Control   | 8.2969  | -26.1337 | 4.2100 | -2.5481 | -2.1594 | -0.6904 | -5.6575  |
| CHS 127 Cancer    | 9.0923  | -23.4174 | 6.7383 | -1.0269 | -1.1649 | 0.9912  | -4.4140  |
| CHS 128 Control   | 6.1555  | -28.8492 | 3.0906 | -3.4176 | -3.2719 | -3.0155 | -8.1326  |
| CHS 129 Control   | 6.4899  | -29.0630 | 2.0363 | -2.8102 | -2.7708 | -1.6835 | -7.1348  |
| CHS 130 Cancer    | 8.3673  | -27.7799 | 4.1860 | -2.7138 | -3.0441 | -2.0479 | -6.8181  |
| CHS 131 Cancer    | 8.8890  | -27.2309 | 3.8401 | -2.7171 | -1.8197 | -1.3167 | -6.1342  |
| CHS 132 Control   | 8.8341  | -26.8007 | 4.5028 | -2.6722 | -1.9091 | -0.8595 | -5.6121  |
| CHS 133 Cancer    | 8.0315  | -27.6864 | 3.6862 | -3.8220 | -3.1287 | -1.7304 | -7.2614  |
| CHS 134 Control   | 7.8689  | -26.8074 | 3.5367 | -2.7256 | -2.7918 | -1.7133 | -6.3606  |
| CHS 135 Cancer    | 8.4454  | -26.8713 | 4.5162 | -2.3349 | -2.0855 | -0.6081 | -4.5197  |
| CHS 136 Control   | 8.9793  | -26.3020 | 5.1788 | -2.0939 | -2.7884 | -0.1594 | -4.4390  |
| CHS 137 Cancer    | 7.8593  | -27.9517 | 5.5750 | -2.3730 | -2.3161 | -0.7229 | -6.1258  |

| Sample ID         | Status    | PIK3CA  | PRL      | RAB7L1  | RAC1    | RAC1    | SELP    | SERPING1 |
|-------------------|-----------|---------|----------|---------|---------|---------|---------|----------|
| Confirmed in EDRN |           | v       | v        | v       |         |         |         |          |
| CHS 138           | Control   | 7.7294  | -27.2471 | 4.9314  | -2.6027 | -2.3688 | -0.5912 | -6.4801  |
| CHS 139           | Cancer    | 8.9415  | -26.1788 | 4.8284  | -2.7164 | -2.1306 | -0.6657 | -5.5801  |
| CHS 140           | Control   | 8.4619  | -26.9570 | 4.8207  | -2.0797 | -1.4249 | 0.1200  | -5.0186  |
| CHS 141           | Cancer    | 9.5087  | -26.0392 | 5.2772  | -1.2075 | -2.4132 | -1.0921 | -6.8041  |
| CHS 142           | Control   | 8.0154  | -26.5995 | 5.4006  | -2.3578 | -2.4874 | -1.1711 | -6.3026  |
| CHS 143           | Cancer    | 9.0850  | -26.3332 | 5.5138  | -2.9711 | -2.9841 | -0.3425 | -5.7033  |
| CHS 144           | Control   | 8.9153  | -26.7558 | 4.5292  | -2.3319 | -1.7114 | -0.9225 | -5.6176  |
| CHS 145           | Cancer    | 8.3423  | -25.9614 | 4.6818  | -2.2740 | -3.8101 | -1.6200 | -6.5090  |
| CHS 146           | Control   | 9.0697  | -25.6508 | 3.7219  | -2.1150 | -3.1848 | -1.1086 | -5.9577  |
| CHS 147           | Cancer    | 7.9972  | -27.5241 | 4.3402  | -3.5904 | -1.9153 | -0.2546 | -5.9099  |
| CHS 148           | Control   | 8.7200  | -27.5551 | 5.6284  | -3.3117 | -1.8179 | 0.0874  | -5.9992  |
| CHS 149           | Control   | 7.5603  | -27.8240 | 5.0758  | -3.7483 | -2.5949 | -1.2801 | -6.3381  |
| CHS 150           | Cancer    | 7.9765  | -27.4546 | 4.8630  | -1.7271 | -1.2581 | -0.7343 | -5.5885  |
| CHS 151           | Control   | 6.6724  | -26.8729 | 4.9585  | -3.3226 | -2.3434 | -0.2181 | -7.6242  |
| CHS 152           | Cancer    | 7.8548  | -27.1390 | 5.4177  | -3.0559 | -1.7938 | -1.2029 | -6.3200  |
| CHS 153           | Control   | 7.5494  | -27.4380 | 2.3419  | -3.0493 | -4.0600 | -1.0646 | -6.5063  |
| CHS 154           | Cancer    | 8.7634  | -27.0439 | 4.7569  | -2.5065 | -1.1319 | -0.6749 | -5.8974  |
| CHS 155           | Cancer    | 9.4211  | -25.8821 | 5.0374  | -2.3397 | -1.6007 | -0.2718 | -5.6259  |
| CHS 156           | Control   | 9.2840  | -27.4759 | 4.5726  | -2.6157 | -1.9811 | -0.9411 | -5.6235  |
| CHS 157           | Cancer    | 8.0563  | -26.2880 | 4.6505  | -3.6281 | -2.3122 | -0.8539 | -6.6357  |
| CHS 158           | Control   | 8.2919  | -26.5561 | 4.6699  | -0.6653 | -2.0922 | -2.0708 | -5.3793  |
| CHS 159           | Cancer    | 7.9112  | -26.6917 | 4.6737  | -2.1229 | -2.9462 | -0.8721 | -5.2980  |
| CHS 160           | Control   | 8.0974  | -28.0561 | 4.4511  | -2.7825 | -2.7204 | -0.9304 | -5.6903  |
| EDRN 1            | Early CRC | 1.5828  | 0.9402   | 0.2180  | 2.0928  | 0.9009  | -0.7759 | 0.5391   |
| EDRN 2            | Early CRC | -3.2524 | -2.0168  | -3.6812 | 2.4692  | -1.1913 | -3.9864 | -1.3054  |
| EDRN 3            | Early CRC | 0.9075  | 1.0948   | 0.5112  | 0.2966  | 2.5376  | 3.2228  | -0.2496  |
| EDRN 4            | Early CRC | 1.3421  | 1.4243   | 0.7776  | 0.1269  | 0.6143  | -0.1635 | 0.8352   |
| EDRN 5            | Late CRC  |         | 1.0656   | 0.2176  | 0.0855  | 0.9015  | 1.2560  | 0.5181   |
| EDRN 6            | Late CRC  | 0.3106  | 0.6807   | -0.2383 | -0.5368 | 0.7450  | -0.6724 | 0.3174   |
| EDRN 7            | Late CRC  | 0.5316  | 1.3544   | 0.2393  | -0.1766 | 0.7299  | 1.2549  | 0.2570   |
| EDRN 8            | Late CRC  | 0.6412  | 0.8450   | 0.2402  |         | -0.4535 | -0.1908 | 0.3246   |
| EDRN 9            | A-Adenoma | -0.6862 | -0.1259  | -0.7433 | -0.5612 | 0.3407  | -1.1229 | 0.2622   |
| EDRN 10           | A-Adenoma | -0.0780 | 1.0546   | -1.2646 | 0.7909  | 1.0140  |         | 0.5695   |
| EDRN 11           | A-Adenoma | 1.2122  | 1.9422   | 0.0571  | 0.7285  | -0.2173 | -1.4082 | 1.0163   |
| EDRN 12           | A-Adenoma | 0.3315  | -0.3011  | -0.6328 | 0.6644  | -0.6955 | -0.0020 | 1.9699   |
| EDRN 13           | Adenomas  | 0.4120  | 3.2328   | 0.0402  | -0.0578 | 1.1323  | 0.0120  |          |
| EDRN 14           | Adenomas  | 2.2225  |          | 0.6665  | -0.0396 | 0.2619  | 1.5669  | 0.5021   |
| EDRN 15           | Adenomas  | 0.3098  | -0.2155  | 0.3205  |         | -0.0360 | 1.2068  | 0.3655   |
| EDRN 16           | Adenomas  | 0.6021  | -0.0080  | -0.2421 | -1.1228 | -0.4107 | 0.3637  | 2.0927   |
| EDRN 17           | Sv normal | 0.1296  | 0.7501   | 0.1876  | -1.9269 | 0.2257  | 0.4589  | 1.5698   |
| EDRN 18           | Sv normal | 0.5504  | 0.3698   | -0.4733 | -0.5009 |         | 0.5472  | 1.2383   |
| EDRN 19           | Sv normal | -0.9246 | -0.1334  | -1.0855 | -1.0758 | 0.2332  | 0.3717  | -0.6541  |
| EDRN 20           | Sv normal | -1.4139 | -0.7824  | -1.5858 | -0.7507 | 0.0823  | -1.4059 | 0.0736   |
| EDRN 21           | Sc normal | -0.8231 | -0.6423  | -1.4404 | -2.0193 | -0.2407 | -0.1486 | 0.4719   |
| EDRN 22           | Sc normal | -0.2729 |          | -0.5210 | -0.6739 | 0.6010  | -0.7696 | 0.0343   |

| Sample ID         | Status    | PIK3CA  | PRL     | RAB7L1  | RAC1    | RAC1    | SELP    | SERPING1 |
|-------------------|-----------|---------|---------|---------|---------|---------|---------|----------|
| Confirmed in EDRN |           | v       | v       | v       |         |         |         |          |
| EDRN 23           | Sc normal | 0.7182  | 1.3458  | -0.8532 | -0.3838 | -0.2839 | -0.7972 | 1.9166   |
| EDRN 24           | Sc normal | 0.2419  | -0.4186 | -0.2044 | 0.0864  | -0.2088 | -0.5075 | 1.0431   |
| EDRN 25           | Early CRC | -0.0290 | -1.1948 | -1.2009 | -0.7626 |         | 0.7451  | 1.4247   |
| EDRN 26           | Early CRC | 1.0592  | 1.8341  | -0.6099 |         | 0.5140  | 0.0690  | 1.5626   |
| EDRN 27           | Early CRC | -0.4566 | 0.6883  | -0.9610 | -0.1370 | -0.1883 | -1.8321 | -0.6120  |
| EDRN 28           | Early CRC | 2.7501  | 2.0334  | 0.5985  | -0.2227 | 0.6866  | 1.0956  | 0.5972   |
| EDRN 29           | Late CRC  | 0.1615  |         | -0.4829 | -0.9282 | 0.2612  | -0.8563 | 0.1505   |
| EDRN 30           | Late CRC  | 0.8553  | 0.8422  | 0.5434  |         | 0.6450  |         | 1.2578   |
| EDRN 31           | Late CRC  | -0.0604 | 1.0910  | 0.2720  | -0.8895 | 0.4153  | 0.8548  | 0.5863   |
| EDRN 32           | Late CRC  | 0.1651  | -0.1710 | -0.8236 | -0.0729 | -0.3525 | -0.2338 | 0.2032   |
| EDRN 33           | A-Adenoma | 0.1019  | 0.8398  | -0.2705 | 0.1895  | 0.1285  | -0.9893 | 0.2513   |
| EDRN 34           | A-Adenoma | -0.0265 | 0.4579  | -0.5238 | -1.0438 | 0.3954  | -0.0227 | 0.2455   |
| EDRN 35           | A-Adenoma | -0.7632 | -0.3184 | -1.0759 | -0.4003 | 0.1446  | -0.2209 | 1.2526   |
| EDRN 36           | A-Adenoma | -0.0290 | -0.5843 | -0.9962 | 0.7872  | 1.1588  | -0.0312 | 0.4697   |
| EDRN 37           | Adenomas  | 0.1773  | 0.8897  | -1.2986 | -1.5822 | -0.0521 | -0.5611 | 1.0747   |
| EDRN 38           | Adenomas  | 0.4279  | 2.4692  | 0.7374  | 1.1111  |         |         | 0.6456   |
| EDRN 39           | Adenomas  | 1.7156  | 1.2311  | 3.3578  | 1.5096  | 1.3520  | 1.6344  | 0.1641   |
| EDRN 40           | Adenomas  | -2.4113 | 1.1248  | -0.6087 | 1.8320  | -1.3912 | -1.6215 | -3.6029  |
| EDRN 41           | Sv normal | 0.7381  | 0.4704  | 0.5566  | 0.0545  | 0.7407  | 1.4969  | 0.3626   |
| EDRN 42           | Sv normal | -0.0723 | 0.9272  | -0.8281 | 0.2101  | 1.2834  | 0.9970  | 2.8881   |
| EDRN 43           | Sv normal | -0.4988 | -0.0580 | -0.8699 | -1.8888 | 0.9795  | -0.1346 | 0.5696   |
| EDRN 44           | Sv normal | -0.2011 | -0.8865 | -2.3457 | -1.0177 | 0.8927  | -0.5880 | 1.5895   |
| EDRN 45           | Sc normal | 1.6546  | 1.0044  | -0.3850 | -0.8952 | 0.6971  |         | 1.6138   |
| EDRN 46           | Sc normal | -1.6187 | 0.5913  | -0.5978 | -0.2260 | -2.0004 | -1.6233 | -0.4244  |
| EDRN 47           | Sc normal | 0.6781  | -2.2503 | -1.0869 | 2.1312  | 0.0087  | -0.4541 | 0.6201   |
| EDRN 48           | Sc normal | 0.6356  | 0.4276  | -0.5904 |         | -0.1510 | 0.8238  | 1.4781   |
| EDRN 49           | Early CRC | -0.3443 | 0.9111  | -0.3908 | 0.8184  | 0.9985  | -0.3383 | 3.8709   |
| EDRN 50           | Early CRC | -1.4911 | 0.3205  | -3.2103 | -0.7102 | 0.5564  | -1.3658 | -1.6124  |
| EDRN 51           | Early CRC | 1.0117  | 1.0113  | 0.2349  | 0.3657  | 1.1984  | 1.0454  | 0.7449   |
| EDRN 52           | Early CRC | 0.0147  | -0.0885 | -0.5683 | 0.2934  | 1.1368  | 0.3472  | 1.9612   |
| EDRN 53           | Late CRC  | -0.7181 | 1.1180  | -1.2926 | -0.7017 | 0.2388  | 0.5996  | 0.3383   |
| EDRN 54           | Late CRC  | 0.7760  | 0.2308  | -0.9540 | -0.4649 | 0.3023  | 0.5898  | 0.0886   |
| EDRN 55           | Late CRC  | -0.2540 | 1.0935  | -1.5729 | 0.4093  | -0.2397 | 0.1904  | 1.3641   |
| EDRN 56           | Late CRC  | 0.4368  | 0.2355  | -0.6607 | 0.6513  | 0.7250  | -0.4605 | 0.8350   |
| EDRN 57           | A-Adenoma | 1.2397  | 0.4624  | -0.3589 | -0.2453 |         | -1.5892 | 3.0152   |
| EDRN 58           | A-Adenoma | -0.5394 | 0.7784  | 0.1001  | -0.4213 | -0.2731 | -0.3972 | 0.0588   |
| EDRN 59           | A-Adenoma | 2.2884  | -0.0039 | 0.8187  | 0.4924  | 0.6490  | 0.6853  | 0.3465   |
| EDRN 60           | A-Adenoma | 0.4884  | 1.3017  | -0.6944 | -0.1603 | 0.3259  | -0.6440 | 0.1606   |
| EDRN 61           | Adenomas  | -0.2733 | 0.0523  | 0.1744  | -0.7454 | 0.4094  | 0.7332  | -0.5003  |
| EDRN 62           | Adenomas  | -0.4743 | 0.3976  | -0.1401 | -0.5480 | -0.9736 | 0.0726  | 0.3532   |
| EDRN 63           | Adenomas  | -0.2932 | -0.0044 | -0.3349 |         | -0.0044 | -1.0970 | -0.2718  |
| EDRN 64           | Adenomas  | 0.2983  | 0.5288  | 0.5999  | -0.5584 | 0.1540  | 0.0910  | 0.9549   |
| EDRN 65           | Sv normal | 0.2184  | 0.3660  | 0.0445  |         | 0.3822  |         | -0.3937  |
| EDRN 66           | Sv normal |         | 0.8867  | -0.1516 | 0.0893  | -0.0489 | -0.5721 | -0.1096  |
| EDRN 67           | Sv normal | 0.0632  | 0.2758  | -0.1051 | 0.2739  | -0.6092 | -0.2758 | -0.1986  |

| Sample ID         | Status    | PIK3CA  | PRL     | RAB7L1  | RAC1    | RAC1    | SELP    | SERPING1 |
|-------------------|-----------|---------|---------|---------|---------|---------|---------|----------|
| Confirmed in EDRN |           | v       | v       | v       |         |         |         |          |
| EDRN 68           | Sv normal | 0.3017  | 0.1355  | 0.0517  | 0.0796  | -0.3776 | -0.1138 |          |
| EDRN 69           | Sc normal | 0.1613  | 0.4065  | -0.0941 | 0.0462  | -0.3447 | -0.5483 | 0.9203   |
| EDRN 70           | Sc normal | 1.5934  | 1.4288  | -0.2851 | -0.9248 | 0.9213  | 1.2147  | 1.1283   |
| EDRN 71           | Sc normal | 0.4497  | 0.3666  | 0.1898  | -0.2214 | 1.3777  | 0.3495  | 1.0100   |
| EDRN 72           | Sc normal | 0.0969  | 0.0104  | -0.8905 | -0.0978 | -0.0202 | 0.0911  | -0.1722  |
| EDRN 73           | Early CRC | 1.0761  | 2.3807  | 0.4594  | 0.5100  | 1.0878  | 0.6671  | 0.9813   |
| EDRN 74           | Early CRC | -0.3093 | 1.1693  | 0.1413  | 0.9532  | 1.4785  | 1.0207  | 2.1899   |
| EDRN 75           | Early CRC | 1.0989  | 1.5210  | -0.6974 | -0.0373 | 1.1223  | 0.3875  | 1.0482   |
| EDRN 76           | Early CRC | 1.1064  | 2.4751  | 0.7179  | 2.1975  | -0.5563 | 1.3677  | 0.4705   |
| EDRN 77           | Late CRC  |         | 0.2739  | 1.0928  | -0.7298 | 0.8265  | 1.5504  | 0.9824   |
| EDRN 78           | Late CRC  | 0.2251  | 0.9973  | -0.5701 | -1.0787 | 0.4600  |         | 0.8427   |
| EDRN 79           | Late CRC  | -0.1185 | 0.3396  | -0.7872 | -0.9655 | 0.7742  | 0.8911  | 0.7797   |
| EDRN 80           | Late CRC  | -0.1856 | -1.4555 | -0.3094 | -0.7607 | 0.0706  | -0.7323 | 1.0268   |
| EDRN 81           | A-Adenoma | 1.8039  | 2.0886  | -0.6918 | 0.0988  | 0.5704  | -0.4389 | 2.0079   |
| EDRN 82           | A-Adenoma | 0.5915  | 1.3075  | 0.5995  | -0.1753 |         | -0.2946 | 0.6392   |
| EDRN 83           | A-Adenoma | 1.0943  | 1.5697  | -0.0838 | 0.6294  | 0.5486  | 1.5093  | 2.1532   |
| EDRN 84           | A-Adenoma | -1.1092 | 0.4213  | -0.5482 | 1.5740  | -1.9058 | -1.8172 | -0.1741  |
| EDRN 85           | Adenomas  | 1.5848  | 1.0161  | 0.8219  | -0.2273 | 0.4023  | 0.0601  | 0.8106   |
| EDRN 86           | Adenomas  | 0.5900  | 0.4588  | -0.1424 | -1.3022 |         | -0.7273 | 1.9937   |
| EDRN 87           | Adenomas  | 0.7958  | 0.5087  | 0.5019  | -0.7444 | -1.3141 | -1.2681 | 0.7183   |
| EDRN 88           | Adenomas  | 1.6728  | 1.5173  | 1.6028  | -0.4512 | 1.8431  | 1.1549  | 1.7883   |
| EDRN 89           | Sv normal |         | -1.4504 | -1.5107 | -0.1057 | 1.4591  | -0.1773 | -0.7958  |
| EDRN 90           | Sv normal | -0.2847 | 1.6828  | -3.6641 | -0.2122 | 0.1396  | -0.1353 | 0.6503   |
| EDRN 91           | Sv normal | -0.9393 | -2.2842 | -0.4538 | -0.3172 | 1.1757  |         | 0.5325   |
| EDRN 92           | Sv normal | 0.2283  | 1.1439  | 0.3993  | 0.1755  | 0.5029  | -0.6417 | 0.3227   |
| EDRN 93           | Sc normal | -0.5369 | -1.1640 | -1.1832 |         | 0.0948  | 0.7472  | 0.6029   |
| EDRN 94           | Sc normal | -0.2552 | 0.4570  | -1.2511 | -1.1275 | -0.3578 | -1.9782 | -2.1136  |
| EDRN 95           | Sc normal | -1.1871 | -0.1615 | -0.7054 | -1.6064 | -0.4425 |         |          |
| EDRN 96           | Sc normal | -2.2496 | -2.5913 | -3.2286 | 1.3844  | -1.8116 | -2.2994 | -3.5655  |
| EDRN 97           | Early CRC | 1.1476  | 0.9550  | 0.3279  | 0.0803  | 0.7357  | 0.3429  | 0.7281   |
| EDRN 98           | Early CRC | 2.5643  | 1.3699  | 1.7099  | 0.5081  | 0.7893  | 0.4243  | 1.3501   |
| EDRN 99           | Early CRC | 0.8374  | 1.3051  | -1.2466 | 0.5066  |         | -0.4618 | -1.0917  |
| EDRN 100          | Early CRC | 0.6733  | 0.8186  | 0.5793  | 0.0296  | 0.9806  | 0.8236  | 0.7014   |
| EDRN 101          | Late CRC  | 0.9191  | -0.1828 | -0.1489 |         |         | 0.9135  | 0.3597   |
| EDRN 102          | Late CRC  | 0.1908  | 2.2664  | 0.6313  | -0.0903 | 0.1050  | 1.2506  | 1.3685   |
| EDRN 103          | Late CRC  | -0.7124 | 0.9889  | -0.2792 |         | 0.7342  | -2.1581 | -0.4741  |
| EDRN 104          | Late CRC  | -0.3989 | 0.9153  |         | -0.2383 | 0.4303  | 0.8523  | 0.2380   |
| EDRN 105          | A-Adenoma | -0.0940 | 0.4513  | 0.9573  | 0.5652  | -0.3258 | 0.0617  | 0.9004   |
| EDRN 106          | A-Adenoma | 0.5581  | 2.1704  | 0.2814  | 0.1265  | 1.6859  | 1.3961  | 0.8851   |
| EDRN 107          | A-Adenoma | -0.2160 | 1.0332  | 0.3486  | -0.2919 | -0.2088 | 0.5444  | 0.4551   |
| EDRN 108          | A-Adenoma | -0.2613 | 1.6553  | 1.0630  | -0.0387 | -0.7739 | 1.1614  | 0.6564   |
| EDRN 109          | Adenomas  | 2.1338  | 1.1789  | 0.6402  | -0.2144 | 0.4201  |         | 1.6638   |
| EDRN 110          | Adenomas  | -0.5205 | -0.0630 | -1.6760 | -0.8244 | 0.6401  | -1.0821 | -0.0780  |
| EDRN 111          | Adenomas  | 0.4556  | 1.3516  | 0.3021  | -0.0618 | 1.9173  | 2.3292  | 1.4956   |
| EDRN 112          | Adenomas  | -3.0166 | -7.1144 | -6.6103 |         | -1.4984 | -5.6901 |          |

| Sample ID Status   | PIK3CA  | PRL     | RAB7L1  | RAC1    | RAC1    | SELP    | SERPING1 |
|--------------------|---------|---------|---------|---------|---------|---------|----------|
| Confirmed in EDRN  | v       | v       | v       |         |         |         |          |
| EDRN 113 Sv normal | 0.8123  | 1.1120  | -0.1467 | -0.1429 | 0.2224  | -0.1661 | 0.3561   |
| EDRN 114 Sv normal | 0.0242  | -0.0217 | -0.3515 | 0.3209  |         | -0.0617 | 0.3500   |
| EDRN 115 Sv normal | 0.5030  | 0.4198  |         | -1.0607 | 0.0712  | 0.1623  | 0.9407   |
| EDRN 116 Sv normal | -0.2729 | -0.5112 | -1.0441 | -0.5840 | -0.2734 | 0.4580  | 0.8082   |
| EDRN 117 Sc normal | 0.8671  | 0.1767  | 0.1359  | 0.0768  | 1.9490  | 0.0336  | 0.7212   |
| EDRN 118 Sc normal | 0.4135  | 0.3005  | -0.7662 | -0.5626 | 0.2888  | -0.1174 | 0.7181   |
| EDRN 119 Sc normal | -0.6717 | 1.0702  | -1.6665 | -0.1113 | -1.3644 | -1.9891 | 0.3911   |
| EDRN 120 Sc normal | -0.9824 | 0.5753  | -1.5337 | -0.4390 | -0.5745 | -0.7175 | 0.2645   |
| EDRN 121 Early CRC | 0.4844  | 0.9677  | 1.3486  | -0.6223 | 0.1690  | -0.4124 | 0.7572   |
| EDRN 122 Early CRC |         | 0.0315  | -0.8153 |         | -1.3162 | -0.8275 | 0.6384   |
| EDRN 123 Early CRC | 0.3770  | 1.2206  | -0.4263 | -0.3225 | 0.0289  | -0.2340 |          |
| EDRN 124 Early CRC | 0.0127  | 0.3939  | 0.0584  | 0.2975  | -0.3943 | -0.2509 | -0.0225  |
| EDRN 125 Late CRC  | -0.1299 | 0.7884  | 0.0367  | -0.7602 | 0.8421  | 0.2344  | 0.5394   |
| EDRN 126 Late CRC  | 0.1164  | 0.1009  | -0.7253 | -0.8226 | -0.7530 | -0.9127 | 0.4835   |
| EDRN 127 Late CRC  | -0.7574 | 0.2468  | -0.7550 | -1.0141 | -0.1884 | -0.2978 | 0.3752   |
| EDRN 128 Late CRC  | 1.2863  | 1.4577  | 0.2033  | -1.3610 | 0.8005  | -0.2842 | 0.7934   |
| EDRN 129 A-Adenoma | 1.6418  | 1.6893  | 0.1926  | -1.0193 | 0.3445  | 0.3515  | 0.7472   |
| EDRN 130 A-Adenoma | 0.7435  | 1.6579  | -0.1654 | -0.9614 | -0.4211 | -0.9524 | 0.9610   |
| EDRN 131 A-Adenoma | 0.6775  | 1.3301  | 0.7211  | -0.5518 | 0.3709  | 0.0733  | 0.4008   |
| EDRN 132 A-Adenoma | 0.0981  | 0.8195  | -0.0649 | -0.5834 | 1.0270  | 0.0542  | 0.9219   |
| EDRN 133 Adenomas  | 0.7314  | 0.8609  | -1.5949 | -0.7134 | 1.8414  | 1.8838  | 0.0652   |
| EDRN 134 Adenomas  | 0.2710  | -0.5224 | -1.1221 | 0.1611  |         |         | 0.9735   |
| EDRN 135 Adenomas  | -0.1794 | 1.8745  | 0.4533  | 0.1585  | 0.6134  | 1.0601  | 0.6295   |
| EDRN 136 Adenomas  | 0.5358  | 1.0585  | 0.4437  | 1.7497  | 0.4437  |         | -0.9314  |
| EDRN 137 Sv normal | -0.5609 | -0.3212 | -0.7846 | 0.3885  | 0.6178  |         | 0.1964   |
| EDRN 138 Sv normal | 1.1548  | 0.6034  | -0.7551 | 0.6903  | 0.6230  | 0.2874  | 1.2426   |
| EDRN 139 Sv normal | -0.5431 | 0.9641  | -0.6660 | 1.5715  | 1.5876  |         | 0.2410   |
| EDRN 140 Sv normal | 0.4069  | -1.1917 | -0.1516 | -0.0694 | 1.4921  | 1.3129  | 1.9463   |
| EDRN 141 Sc normal | 0.3802  | 0.5164  | -2.0327 | 0.4691  | -0.0566 | 0.1831  | 0.1917   |
| EDRN 142 Sc normal | -2.6045 | -3.0711 | -2.0205 |         | -1.1851 | -2.8449 | 1.4996   |
| EDRN 143 Sc normal | -0.4561 | 0.9276  | 0.8684  | 0.7386  |         | 0.6594  | 0.4751   |
| EDRN 144 Sc normal | 0.9084  | -0.1817 | -1.7368 | 0.2962  | -0.2207 |         | 0.5833   |
| EDRN 145 Early CRC | 0.1958  | 0.1318  | -0.7006 | -0.0319 | 1.4871  | 0.9883  |          |
| EDRN 146 Early CRC | -0.0456 | 0.2054  | -1.2789 | -0.1755 | 0.4275  | -1.7536 | 0.6853   |
| EDRN 147 Early CRC | 2.0505  | 1.4292  | 1.1738  | -0.7047 | 1.3341  | 1.8428  | 1.3234   |
| EDRN 148 Early CRC | 0.1042  | 0.6390  | 0.2387  | -0.1420 | 0.7260  | -0.4736 | 0.6318   |
| EDRN 149 Late CRC  | -1.0016 | 1.2268  | -0.3927 | -0.0160 | -2.2489 | 0.4956  | 0.9158   |
| EDRN 150 Late CRC  | 0.8683  | 0.8236  | 1.1322  | -0.1361 | 0.1529  | 0.4432  | 0.6179   |
| EDRN 151 Late CRC  | 0.6292  | 1.2948  | -0.1124 | 0.0854  | -0.2201 | 0.3785  | 0.6036   |
| EDRN 152 Late CRC  | 1.0119  | 1.8653  | 0.1572  | 0.3388  |         | -1.5059 | 0.5370   |
| EDRN 153 A-Adenoma | 0.1462  | -0.3447 | -2.9366 | 0.6853  | -1.4333 | -2.4328 | 0.3538   |
| EDRN 154 A-Adenoma |         | 0.3705  | 0.1729  | 0.1226  | -1.5361 | 1.3030  | 0.6368   |
| EDRN 155 A-Adenoma | -0.2474 | 1.3752  | 0.0745  | 0.1904  | 1.3306  | 0.1475  | 0.5421   |
| EDRN 156 A-Adenoma | 0.1508  | 1.2246  | -0.2510 | 0.3329  | 0.2193  | 0.2341  | 0.8447   |
| EDRN 157 Adenomas  | 0.2775  | 1.3696  |         | -0.5311 | 1.9652  | 0.2085  | 0.4572   |

| Sample ID         | Status    | PIK3CA  | PRL     | RAB7L1  | RAC1    | RAC1    | SELP    | SERPING1 |
|-------------------|-----------|---------|---------|---------|---------|---------|---------|----------|
| Confirmed in EDRN |           | v       | v       | v       |         |         |         |          |
| EDRN 158          | Adenomas  | 1.9029  | 0.9642  | -0.5502 | -2.0969 | 1.0835  | 3.1026  | 2.4319   |
| EDRN 159          | Adenomas  | 0.4057  | 1.0044  | -0.1197 | -0.2466 | -0.5986 | -1.2716 | -0.1076  |
| EDRN 160          | Adenomas  | -0.3729 | 0.8365  | 0.8491  | 0.4797  |         | -0.2485 | 0.5728   |
| EDRN 161          | Sv normal | -0.3403 | 0.1544  | -0.0779 | -0.8694 | 1.1529  | -0.4013 | -0.4904  |
| EDRN 162          | Sv normal | -0.4392 | -1.2387 | -1.5838 | 0.8122  | -0.9624 | -1.2771 | 0.9992   |
| EDRN 163          | Sv normal | -1.2813 | -0.0252 | -1.4027 | -0.7053 | 0.3905  | -0.7032 | -0.9066  |
| EDRN 164          | Sv normal | -0.8473 | -0.8148 | -0.6910 | -0.6548 | 0.8058  | 0.4478  | 0.1429   |
| EDRN 165          | Sc normal | -0.8865 | -0.2365 | -1.0653 | 0.1926  | -0.9311 | 0.2656  | 0.9591   |
| EDRN 166          | Sc normal | 1.7690  | -0.3925 | -2.2084 | 1.4188  | -0.0722 | -2.4176 | 1.1074   |
| EDRN 167          | Sc normal | 0.2935  | -0.4037 | -0.2398 | -1.0667 | 2.8727  | 0.7630  | 0.3237   |
| EDRN 168          | Sc normal | 0.2516  | 0.7622  | 0.5116  | 0.1561  | 0.2227  | 0.2049  | 0.5267   |
| EDRN 169          | Early CRC | 1.1867  | 1.4017  | 1.6753  | -0.7981 | 1.3976  | 0.9968  | 0.4381   |
| EDRN 170          | Early CRC | 0.5017  | 0.4286  | -0.1296 | 0.4938  | -1.0182 | -1.6841 | 0.6005   |
| EDRN 171          | Late CRC  | 1.2388  | 0.4362  | -0.2478 | 0.7306  | 3.0899  | 2.4272  | 0.3918   |
| EDRN 172          | Late CRC  | 1.4197  | 1.6371  | 0.0490  | 0.2291  | -0.2032 | -0.4040 | 0.7475   |
| EDRN 173          | A-Adenoma | -0.1898 | 0.3220  | -0.6196 | -0.7430 | 0.0406  | 0.1776  | 0.5552   |
| EDRN 174          | A-Adenoma | 0.3930  | 0.5295  | -0.1112 | -0.1192 | -1.4554 | -0.9255 | 1.1436   |
| EDRN 175          | Adenomas  | -2.2083 | -0.1748 | -1.5038 | -0.1470 | -0.0960 | -0.1761 | 1.4206   |
| EDRN 176          | Adenomas  | 0.8712  | 0.7635  | -0.5380 | 2.1149  | 0.7931  | 0.9584  | 0.0671   |
| EDRN 177          | Sv normal | 1.3338  | 0.8532  | 0.5760  | -1.4114 | 1.1079  | 0.5139  | 0.9667   |
| EDRN 178          | Sv normal | -1.4673 | -0.4009 | -0.7239 | -0.7261 | 0.7700  | 0.0491  | 0.8575   |
| EDRN 179          | Sc normal | -0.1615 | 0.4235  | -2.5895 | -1.1608 | -1.1908 | -1.6824 | -0.7784  |
| EDRN 180          | Sc normal | -0.4414 | -0.1089 | -0.5820 | 0.2564  | 0.1646  | -1.0809 | 0.7739   |



| Sample ID         | Status  | SMO      | SOX2    | SPP1   | SPP1    | SSBP2   | SV2A   | TBC1D3  |
|-------------------|---------|----------|---------|--------|---------|---------|--------|---------|
| Confirmed in EDRN |         |          |         | v      |         |         | v      |         |
| CHS 1             | Control | -7.6950  | 0.9061  | 4.5700 | -2.3789 | -4.9821 | 6.9301 | -1.0491 |
| CHS 2             | Cancer  | -8.7399  | -0.0731 | 3.9979 | -3.3214 | -5.4982 | 6.0911 | 0.0136  |
| CHS 3             | Cancer  | -9.5625  | 0.7459  | 3.4411 | -1.7792 | -4.2276 | 6.3933 | -1.1406 |
| CHS 4             | Control | -10.5345 | -0.4463 | 2.6333 | -2.5977 | -5.8506 | 5.1999 | -1.1947 |
| CHS 5             | Control | -9.3008  | 0.3692  | 4.3671 | -2.6239 | -4.7635 | 5.8795 | -0.2945 |
| CHS 6             | Cancer  | -9.4881  | -0.0959 | 3.4296 | -3.0314 | -5.8667 | 6.3465 | 0.0806  |
| CHS 7             | Control | -10.2777 | 0.6891  | 3.1352 | -1.5218 | -6.4098 | 5.2114 | -0.7034 |
| CHS 8             | Cancer  | -10.3173 | -0.1756 | 4.2434 | -1.3690 | -5.3573 | 6.5859 | -0.6015 |
| CHS 9             | Cancer  | -9.4554  | 0.5186  | 4.2845 | -2.3525 | -4.9939 | 6.4638 | -0.1102 |
| CHS 10            | Control | -9.9682  | 0.7122  | 3.4039 | -2.5417 | -5.0606 | 6.2712 | 0.1267  |
| CHS 11            | Control | -11.8270 | -3.6428 | 1.0365 | -4.3387 | -7.0244 | 3.7233 | -2.5752 |
| CHS 12            | Cancer  | -10.7274 | -0.3241 | 2.5851 | -2.5342 | -5.3005 | 5.5232 | -0.3443 |
| CHS 13            | Cancer  | -10.5671 | 0.4205  | 4.1813 | -2.4240 | -4.5734 | 6.0042 | -0.7642 |
| CHS 14            | Control | -10.3471 | 0.6089  | 3.2461 | -2.5499 | -6.0947 | 5.9139 | -0.5544 |
| CHS 15            | Control | -9.9005  | -0.3421 | 3.8584 | -2.1985 | -5.2651 | 5.5187 | -1.5011 |
| CHS 16            | Cancer  | -11.1289 | 0.5338  | 2.7221 | -3.3164 | -2.1756 | 5.5755 | -0.7275 |
| CHS 17            | Cancer  | -10.7020 | 1.4446  | 3.7812 | -1.3351 | -1.5037 | 6.1680 | 1.1316  |
| CHS 18            | Control | -10.7743 | 0.1791  | 4.6769 | -2.0315 | -5.1296 | 5.7745 | -0.9052 |
| CHS 19            | Cancer  | -11.4142 | 0.3436  | 3.5334 | -2.1390 | -6.2864 | 5.3910 | -1.0557 |
| CHS 20            | Control | -12.2193 | -1.2559 | 2.5440 | -3.4522 | -7.2431 | 3.7624 | -0.9775 |
| CHS 21            | Cancer  | -8.3920  | 0.2830  | 4.8282 | -1.2128 | -3.8994 | 6.2331 | 0.7768  |
| CHS 22            | Control | -10.6340 | -0.4599 | 2.0385 | -4.0935 | -6.8002 | 4.9482 | -0.5796 |
| CHS 23            | Cancer  | -10.1276 | 0.9058  | 3.8835 | -2.7967 | -5.5194 | 5.0218 | 0.9330  |
| CHS 24            | Control | -14.6802 | -5.5736 | 1.6180 | -4.7217 | -7.6944 | 0.3248 | -3.5070 |
| CHS 25            | Cancer  | -11.1773 | -0.1169 | 3.1316 | -3.1754 | -5.6228 | 5.1322 | -1.3706 |
| CHS 26            | Control | -10.8496 | -0.1127 | 2.6471 | -2.8414 | -5.5409 | 5.5647 | -1.0108 |
| CHS 27            | Cancer  | -11.2512 | -0.5124 | 2.2016 | -2.2835 | -5.0574 | 5.3398 | 0.4468  |
| CHS 28            | Control | -9.4045  | 0.8868  | 4.1972 | -2.2650 | -5.2689 | 6.6220 | -1.9398 |
| CHS 29            | Cancer  | -10.6984 | 0.2122  | 3.6502 | -2.6668 | -4.6522 | 5.3399 | -1.1268 |
| CHS 30            | Control | -11.1289 | -0.0873 | 3.8137 | -2.7881 | -4.8614 | 5.5091 | -0.6737 |
| CHS 31            | Control | -9.1771  | 0.3314  | 4.1026 | -2.9374 | -5.4832 | 6.0724 | -0.5671 |
| CHS 32            | Cancer  | -10.4192 | -0.1083 | 3.2786 | -3.3154 | -5.5076 | 5.5120 | -1.3663 |
| CHS 33            | Cancer  | -10.5791 | 0.8021  | 3.8407 | -3.5697 | -4.7594 | 5.5252 | 0.2791  |
| CHS 34            | Control | -10.6794 | 0.0702  | 2.9661 | -2.8284 | -5.8974 | 4.6631 | -1.6718 |
| CHS 35            | Control | -11.0532 | -1.2430 | 2.2517 | -2.8350 | -5.6604 | 5.2083 | -2.0005 |
| CHS 36            | Cancer  | -10.1336 | -0.6049 | 3.4831 | -2.2231 | -5.2739 | 5.7006 | -1.7243 |
| CHS 37            | Cancer  | -10.3530 | -0.1867 | 3.2586 | -2.8482 | -4.9877 | 5.3492 | -0.2918 |
| CHS 38            | Control | -10.9092 | -1.2557 | 2.7742 | -3.6351 | -5.4917 | 4.8080 | 0.1843  |
| CHS 39            | Control | -11.5024 | -1.9077 | 2.5907 | -2.6987 | -5.8290 | 4.0851 | -1.7311 |
| CHS 40            | Cancer  | -9.2681  | 0.6824  | 3.6598 | -2.3996 | -5.0452 | 6.0853 | 1.1085  |
| CHS 41            | Control | -10.5435 | -0.5628 | 4.2666 | -2.3873 | -5.4616 | 5.1349 | -0.8496 |
| CHS 42            | Cancer  | -9.9846  | -0.6867 | 3.4211 | -2.4588 | -5.2001 | 5.6343 | -0.3993 |
| CHS 43            | Control | -10.4417 | -0.2203 | 3.5678 | -2.7901 | -6.2941 | 6.1199 | -0.8755 |
| CHS 44            | Cancer  | -9.7309  | -0.3758 | 2.9579 | -2.4950 | -5.2035 | 5.7303 | 0.1406  |
| CHS 45            | Control | -9.9136  | -0.3096 | 3.9018 | -1.6023 | -4.7333 | 5.2425 | -0.0666 |

| Sample ID         | Status  | SMO      | SOX2    | SPP1   | SPP1    | SSBP2   | SV2A   | TBC1D3  |
|-------------------|---------|----------|---------|--------|---------|---------|--------|---------|
| Confirmed in EDRN |         |          |         | v      |         |         | v      |         |
| CHS 46            | Cancer  | -9.4649  | 1.4801  | 5.0380 | -1.6950 | -4.7415 | 6.0421 | 0.9998  |
| CHS 47            | Cancer  | -9.8088  | 0.2646  | 3.4552 | -2.5072 | -5.6405 | 5.8077 | -0.9334 |
| CHS 48            | Control | -10.3089 | -0.1679 | 3.5833 | -1.4150 | -5.3068 | 5.0264 | -0.0837 |
| CHS 49            | Cancer  | -10.9420 | -1.3169 | 2.3672 | -2.8399 | -5.6994 | 5.5067 | -0.3639 |
| CHS 50            | Control | -10.4027 | -0.1612 | 2.6689 | -2.9027 | -5.5738 | 4.8809 | -1.9451 |
| CHS 51            | Cancer  | -10.4034 | -0.4006 | 3.0051 | -2.2431 | -6.4612 | 5.6319 | -1.3509 |
| CHS 52            | Control | -9.8996  | -0.6689 | 3.8956 | -3.0173 | -6.2247 | 5.4828 | -2.4914 |
| CHS 53            | Control | -11.1344 | -0.0890 | 3.1789 | -2.6209 | -5.8747 | 5.1696 | -1.3025 |
| CHS 54            | Cancer  | -9.5705  | -0.4247 | 2.5012 | -2.4601 | -5.2628 | 5.5361 | -1.7156 |
| CHS 55            | Cancer  | -11.1307 | -1.2290 | 2.3820 | -3.2399 | -5.8007 | 5.3442 | -0.4367 |
| CHS 56            | Control | -10.5858 | -1.0028 | 1.8511 | -2.1828 | -5.2108 | 5.8073 | -0.7889 |
| CHS 57            | Control | -11.1314 | 0.0301  | 3.0568 | -3.7541 | -4.7099 | 4.1130 | -0.8840 |
| CHS 58            | Cancer  | -10.4550 | -0.0317 | 3.2983 | -2.0824 | -5.7782 | 5.9117 | -0.5684 |
| CHS 59            | Cancer  | -11.1745 | 0.2385  | 3.7467 | -2.5271 | -6.3652 | 4.9673 | -0.2904 |
| CHS 60            | Control | -10.6861 | 0.1842  | 4.4917 | -2.7303 | -5.4461 | 5.6119 | 0.2277  |
| CHS 61            | Cancer  | -8.9617  | 0.3456  | 4.0891 | -2.9206 | -5.2935 | 6.2799 | 0.3128  |
| CHS 62            | Control | -12.0287 | -1.1416 | 3.0949 | -4.6173 | -6.9363 | 4.0803 | -2.6939 |
| CHS 63            | Cancer  | -8.8680  | 1.5783  | 5.2278 | -1.5681 | -3.4056 | 6.2585 | 0.5443  |
| CHS 64            | Control | -11.4588 | -0.8641 | 2.3550 | -3.3931 | -5.4926 | 4.1064 | 0.9923  |
| CHS 65            | Cancer  | -9.4697  | 1.2120  | 4.4410 | -1.3846 | -3.9528 | 6.5784 | 1.1583  |
| CHS 66            | Control | -9.4642  | 1.3100  | 4.5732 | -1.4545 | -3.8404 | 7.0366 | 0.3170  |
| CHS 67            | Control | -11.1468 | -0.8544 | 3.1130 | -2.9356 | -6.7872 | 4.0489 | -0.6294 |
| CHS 68            | Cancer  | -10.1011 | -0.2428 | 3.2704 | -2.8175 | -4.1251 | 5.4166 | 0.2062  |
| CHS 69            | Cancer  | -9.7797  | 0.2321  | 5.0059 | -2.7936 | -3.4731 | 6.3888 | -1.6734 |
| CHS 70            | Control | -9.4059  | 0.0524  | 3.2281 | -2.4020 | -5.3249 | 5.5394 | -1.0670 |
| CHS 71            | Cancer  | -9.8667  | -0.2346 | 4.5115 | -2.1762 | -5.6009 | 6.0724 | -0.2940 |
| CHS 72            | Control | -10.7139 | -0.2496 | 2.6857 | -1.5980 | -4.8801 | 5.4855 | -0.7864 |
| CHS 73            | Control | -11.9384 | -1.6414 | 1.6994 | -4.4084 | -6.5124 | 5.7073 | -1.9171 |
| CHS 74            | Cancer  | -10.3866 | 1.2990  | 4.2473 | -1.8082 | -4.4781 | 6.0708 | -0.2154 |
| CHS 75            | Cancer  | -10.0179 | -0.4609 | 3.4832 | -1.9341 | -3.7421 | 5.9942 | -0.7154 |
| CHS 76            | Control | -9.4787  | -1.5241 | 2.3310 | -2.2912 | -5.8660 | 4.1379 | 1.1867  |
| CHS 77            | Control | -11.6204 | -0.5708 | 1.8362 | -2.2507 | -5.6903 | 4.7692 | -1.1165 |
| CHS 78            | Cancer  | -10.7101 | 0.0630  | 2.8469 | -2.8279 | -4.4991 | 6.4306 | 0.9666  |
| CHS 79            | Cancer  | -10.8363 | -0.0687 | 4.7571 | -2.8001 | -4.3431 | 6.0971 | -1.3115 |
| CHS 80            | Control | -10.3830 | 0.1160  | 4.7311 | -1.3893 | -4.3372 | 6.6918 | -0.7908 |
| CHS 81            | Control | -10.3531 | 0.2122  | 3.2384 | -1.8928 | -7.2892 | 4.8674 | -0.8061 |
| CHS 82            | Cancer  | -10.6071 | -0.0882 | 3.6182 | -1.8134 | -4.9664 | 5.9633 | -1.0045 |
| CHS 83            | Cancer  | -9.2992  | 0.1960  | 3.7420 | -1.7230 | -4.6813 | 5.4875 | 1.7398  |
| CHS 84            | Control | -10.0304 | 0.7700  | 2.6387 | -2.0308 | -5.9745 | 5.9236 | -2.5606 |
| CHS 85            | Cancer  | -10.1977 | -0.0840 | 2.8235 | -3.7233 | -5.7813 | 5.0933 | 0.0817  |
| CHS 86            | Control | -10.9226 | -0.6070 | 2.4424 | -4.0323 | -6.0056 | 4.9961 | -0.5356 |
| CHS 87            | Control | -11.1407 | -0.5762 | 3.4647 | -3.7263 | -5.5240 | 4.5175 | -2.0450 |
| CHS 88            | Cancer  | -10.0161 | -0.7775 | 3.5468 | -2.6153 | -5.4563 | 4.7217 | -0.9758 |
| CHS 89            | Control | -10.9483 | -0.2250 | 4.5868 | -1.9129 | -5.5431 | 5.3449 | -1.0182 |
| CHS 90            | Cancer  | -10.2227 | 1.0146  | 4.4316 | -1.9470 | -5.0909 | 6.0852 | -0.8312 |

| Sample ID Status  | SMO      | SOX2    | SPP1   | SPP1    | SSBP2   | SV2A   | TBC1D3  |
|-------------------|----------|---------|--------|---------|---------|--------|---------|
| Confirmed in EDRN | v        |         |        | v       |         |        |         |
| CHS 91 Cancer     | -9.4875  | -0.2113 | 4.0359 | -4.0328 | -6.9080 | 5.8307 | -0.9202 |
| CHS 92 Control    | -10.5826 | -0.0472 | 3.2672 | -3.8969 | -4.6813 | 5.5471 | -1.8577 |
| CHS 93 Control    | -9.9272  | -0.3788 | 2.8179 | -2.8779 | -5.6216 | 4.7627 | 0.2940  |
| CHS 94 Cancer     | -9.7997  | -0.3312 | 4.2161 | -2.5530 | -4.6598 | 5.3607 | 0.7703  |
| CHS 95 Control    | -9.6102  | 0.0672  | 3.4601 | -2.4796 | -4.8057 | 5.7477 | -1.4694 |
| CHS 96 Cancer     | -10.2647 | 0.1255  | 3.7766 | -1.6945 | -5.0627 | 5.1068 | -0.4716 |
| CHS 97 Cancer     | -10.6992 | 0.7881  | 4.0644 | -1.9588 | -4.2918 | 4.6830 | -0.3185 |
| CHS 98 Control    | -10.9366 | -1.5284 | 3.5233 | -4.8075 | -9.1445 | 4.6540 | -2.8025 |
| CHS 99 Cancer     | -10.4529 | 0.1962  | 4.5094 | -2.1402 | -4.3111 | 5.2687 | -2.3334 |
| CHS 100 Control   | -11.2384 | 0.6018  | 2.4202 | -2.2194 | -4.2797 | 5.1344 | -0.8132 |
| CHS 101 Cancer    | -9.1023  | 0.2558  | 4.2477 | -2.0757 | -4.1775 | 5.3703 | 0.6699  |
| CHS 102 Control   | -10.2163 | 0.9025  | 5.7980 | -1.3202 | -3.6108 | 5.4580 | 1.1493  |
| CHS 103 Cancer    | -10.1681 | -0.4053 | 4.5647 | -2.3910 | -4.9570 | 5.9426 | -0.3722 |
| CHS 104 Control   | -11.1899 | -0.8175 | 0.3785 | -4.1352 | -7.0984 | 5.9362 | -0.9653 |
| CHS 105 Cancer    | -10.4934 | 0.7126  | 4.2856 | -1.0874 | -4.8329 | 6.3399 | -0.1562 |
| CHS 106 Control   | -10.5891 | -1.1250 | 2.0962 | -4.3357 | -6.0394 | 4.2989 | 1.1040  |
| CHS 107 Cancer    | -9.9332  | -0.3699 | 3.8361 | -3.8095 | -5.1424 | 5.0162 | -0.0817 |
| CHS 108 Control   | -10.4578 | 0.4107  | 2.7262 | -1.4241 | -4.7576 | 5.7009 | -1.5737 |
| CHS 109 Control   | -10.8820 | -0.6902 | 3.5006 | -2.7408 | -6.3017 | 5.4921 | -0.5390 |
| CHS 110 Cancer    | -11.3726 | -0.3996 | 2.2689 | -4.1319 | -5.8122 | 5.4800 | -1.4668 |
| CHS 111 Control   | -10.6189 | -0.8743 | 3.6723 | -3.3633 | -5.2036 | 5.3567 | -0.8271 |
| CHS 112 Cancer    | -8.8304  | 0.1868  | 3.8605 | -2.4029 | -5.4647 | 6.2142 | -1.7150 |
| CHS 113 Control   | -9.3262  | 0.6720  | 4.4193 | -1.3858 | -5.2214 | 6.0627 | -0.0788 |
| CHS 114 Cancer    | -10.8367 | -0.7464 | 2.7032 | -2.8006 | -5.0930 | 5.2869 | -0.6992 |
| CHS 117 Control   | -10.4394 | -0.8991 | 2.9394 | -2.2179 | -5.7786 | 5.4237 | -0.0259 |
| CHS 118 Cancer    | -10.6862 | -0.3365 | 2.9456 | -2.7851 | -5.8876 | 5.7656 | -1.0676 |
| CHS 119 Cancer    | -9.9539  | 0.2834  | 3.2801 | -1.6729 | -4.4849 | 5.9221 | -1.1932 |
| CHS 120 Control   | -9.6258  | -0.2357 | 3.1626 | -2.2343 | -5.0028 | 5.5101 | -0.1240 |
| CHS 121 Control   | -10.6824 | -0.7086 | 1.8561 | -3.3803 | -5.9430 | 5.6936 | -1.4995 |
| CHS 122 Cancer    | -10.2707 | -0.5934 | 2.6063 | -2.3484 | -5.2960 | 5.4244 | 0.4523  |
| CHS 123 Cancer    | -10.9530 | -0.1472 | 2.9837 | -1.5815 | -5.4002 | 4.9554 | -0.0381 |
| CHS 124 Control   | -10.3624 | 0.8852  | 3.0742 | -1.9465 | -6.4831 | 5.8099 | -0.7267 |
| CHS 125 Cancer    | -11.0493 | 0.4458  | 3.3151 | -2.8120 | -5.4921 | 4.5262 | -0.8484 |
| CHS 126 Control   | -9.5750  | 0.0985  | 3.2326 | -2.3655 | -5.3087 | 6.3132 | -1.5484 |
| CHS 127 Cancer    | -8.9293  | 0.3672  | 3.4408 | -2.8099 | -4.8969 | 5.8597 | 1.0712  |
| CHS 128 Control   | -12.0480 | -1.5829 | 3.3709 | -3.6137 | -7.0354 | 3.6163 | -0.9443 |
| CHS 129 Control   | -11.9637 | -1.2580 | 3.5463 | -3.5616 | -5.2502 | 4.0340 | -1.2073 |
| CHS 130 Cancer    | -10.9285 | -1.0820 | 2.6919 | -3.5067 | -6.8697 | 4.1727 | -0.7968 |
| CHS 131 Cancer    | -10.5578 | -0.2869 | 3.7458 | -2.3779 | -4.6535 | 5.0948 | 0.5751  |
| CHS 132 Control   | -10.2847 | 0.8041  | 3.1801 | -1.5448 | -5.3260 | 6.1011 | -0.6404 |
| CHS 133 Cancer    | -11.6567 | -1.7191 | 2.0265 | -4.8799 | -6.7451 | 4.4841 | -0.9317 |
| CHS 134 Control   | -10.6964 | -0.3237 | 2.3635 | -2.3186 | -5.7180 | 4.6646 | -0.0319 |
| CHS 135 Cancer    | -9.8683  | -0.0180 | 3.4931 | -2.0982 | -5.3842 | 5.8470 | -0.3517 |
| CHS 136 Control   | -8.9789  | 0.7086  | 4.8699 | -1.8522 | -3.3160 | 6.9283 | -1.2490 |
| CHS 137 Cancer    | -10.9257 | 0.1010  | 4.3556 | -1.8847 | -4.4864 | 6.4437 | -0.8954 |

| Sample ID Status  | SMO      | SOX2    | SPP1    | SPP1    | SSBP2   | SV2A    | TBC1D3  |
|-------------------|----------|---------|---------|---------|---------|---------|---------|
| Confirmed in EDRN | v        |         |         | v       |         |         |         |
| CHS 138 Control   | -10.4326 | -0.0601 | 2.8933  | -3.3149 | -5.0783 | 5.6629  | -1.2055 |
| CHS 139 Cancer    | -8.6276  | 0.2404  | 5.5453  | -1.3481 | -4.7497 | 5.9946  | -0.3745 |
| CHS 140 Control   | -10.1172 | 0.6096  | 5.2145  | -2.3114 | -4.0859 | 6.0990  | -1.1873 |
| CHS 141 Cancer    | -9.6668  | 0.4139  | 3.7201  | -2.6190 | -5.9512 | 6.0112  | -0.0613 |
| CHS 142 Control   | -10.2968 | -0.5453 | 2.7445  | -3.2545 | -4.5452 | 6.4213  | -1.0847 |
| CHS 143 Cancer    | -10.3972 | 0.0216  | 3.5225  | -2.9983 | -4.8062 | 5.4139  | -1.6422 |
| CHS 144 Control   | -9.5119  | -0.0991 | 4.2464  | -1.9330 | -4.6993 | 5.6832  | -0.3572 |
| CHS 145 Cancer    | -10.6201 | 0.0261  | 3.9456  | -2.0834 | -5.7020 | 5.5006  | -1.4678 |
| CHS 146 Control   | -9.9960  | -0.3801 | 3.4122  | -2.0719 | -5.4196 | 5.3718  | 0.1490  |
| CHS 147 Cancer    | -10.3454 | -0.1114 | 3.5047  | -2.7773 | -4.7741 | 6.4110  | -0.1808 |
| CHS 148 Control   | -9.7181  | 0.4842  | 4.0676  | -3.4038 | -4.5313 | 5.5696  | -0.8807 |
| CHS 149 Control   | -10.5886 | 0.0256  | 3.1784  | -3.2432 | -5.3881 | 4.7403  | -0.5487 |
| CHS 150 Cancer    | -9.7406  | 0.4097  | 3.3654  | -2.2932 | -4.5055 | 5.5905  | 0.1474  |
| CHS 151 Control   | -10.4183 | -0.7941 | 3.7576  | -3.3209 | -6.1180 | 5.3604  | -0.6828 |
| CHS 152 Cancer    | -10.1030 | -0.8514 | 3.7745  | -3.2386 | -5.6570 | 6.0022  | -0.5824 |
| CHS 153 Control   | -10.7863 | -0.3917 | 2.5185  | -3.6753 | -6.0593 | 5.0753  | -1.5754 |
| CHS 154 Cancer    | -9.3051  | 0.1708  | 3.8057  | -0.8271 | -5.5786 | 5.8784  | -0.4905 |
| CHS 155 Cancer    | -10.0385 | -0.0132 | 4.1459  | -0.7421 | -4.0722 | 6.1157  | -0.9905 |
| CHS 156 Control   | -10.3704 | -0.3946 | 2.2738  | -2.5345 | -5.0109 | 4.9413  | -0.5873 |
| CHS 157 Cancer    | -11.5321 | -1.2659 | 2.3285  | -3.8410 | -6.6125 | 4.1129  | 0.1518  |
| CHS 158 Control   | -10.7886 | 1.0356  | 4.4536  | -1.8556 | -4.9933 | 6.1509  | -0.4988 |
| CHS 159 Cancer    | -10.9492 | 0.1587  | 2.6781  | -2.9748 | -5.2151 | 5.4080  | -1.6422 |
| CHS 160 Control   | -10.5538 | -0.5939 | 3.4826  | -2.8916 | -5.3761 | 5.2744  | -0.6694 |
| EDRN 1 Early CRC  |          | 1.6469  | 0.6384  |         | 1.3678  | 0.6636  | -0.7419 |
| EDRN 2 Early CRC  |          | -1.7642 | -3.1879 | -0.7496 | -2.2391 | -3.7283 | -2.3572 |
| EDRN 3 Early CRC  |          | 1.1042  | 2.2797  | 0.7109  | 1.4561  | 1.2324  | -0.1099 |
| EDRN 4 Early CRC  |          | 1.5229  | 2.5848  | 0.2313  | 1.4271  | 1.2230  | -0.4942 |
| EDRN 5 Late CRC   |          | 0.6711  | 1.5733  | 0.6929  | 1.4560  | 1.5028  | -0.3798 |
| EDRN 6 Late CRC   |          | 0.5831  | 0.9690  | 0.4517  | 0.5344  | 1.8409  |         |
| EDRN 7 Late CRC   |          | 1.1769  | 1.5591  | -0.0559 | 1.1050  | 1.3006  | -0.7116 |
| EDRN 8 Late CRC   |          | 0.9039  | 1.5981  | 0.0179  | 1.2686  | -0.0542 | -0.6099 |
| EDRN 9 A-Adenoma  |          | 0.0592  | 0.4413  | 0.4650  | -0.2756 | 0.9988  | -0.3224 |
| EDRN 10 A-Adenoma |          | 0.6781  | 0.6476  | 1.3755  | 1.2562  | 0.6728  | -1.3219 |
| EDRN 11 A-Adenoma |          | 2.9779  | 1.2366  | 1.6870  | 1.0228  | 0.9334  | -0.8472 |
| EDRN 12 A-Adenoma |          | 0.9107  | 2.3841  | 0.4474  | 1.0571  | 2.5332  |         |
| EDRN 13 Adenomas  |          | -0.1705 | -1.8765 | 1.2894  | -0.1311 |         | -1.3196 |
| EDRN 14 Adenomas  |          | 1.6407  | -0.4241 | -0.7598 |         | 2.2889  | -1.2885 |
| EDRN 15 Adenomas  |          | 0.3236  | 0.4433  | 1.0449  | 0.3875  | 1.5463  | -0.1657 |
| EDRN 16 Adenomas  |          | 0.9089  |         | 0.4259  | 0.8699  | 1.2149  | -0.5499 |
| EDRN 17 Sv normal |          | 1.7340  | 1.1731  | 0.5894  | 0.7517  | 1.5839  | -0.8566 |
| EDRN 18 Sv normal |          | 0.2693  | 1.6509  | 2.2413  | 0.6388  | 2.0708  | -0.1180 |
| EDRN 19 Sv normal |          | 1.1374  | 2.0441  | 0.2070  | 0.8214  | -0.2871 |         |
| EDRN 20 Sv normal |          | -0.1109 | 0.3196  | 0.5630  | 0.9080  | 0.6814  | 1.0628  |
| EDRN 21 Sc normal |          | 0.9136  | 0.2717  | -0.4513 | 0.7307  | 0.8704  | -0.2151 |
| EDRN 22 Sc normal |          | 0.6064  | 1.4721  | 0.7088  |         | 0.3995  |         |

| Sample ID         | Status    | SMO | SOX2    | SPP1    | SPP1    | SSBP2   | SV2A    | TBC1D3  |
|-------------------|-----------|-----|---------|---------|---------|---------|---------|---------|
| Confirmed in EDRN |           |     |         | v       |         |         | v       |         |
| EDRN 23           | Sc normal |     | 0.6838  | 1.0332  | 0.4324  | 1.4819  | 0.4709  | -0.5438 |
| EDRN 24           | Sc normal |     | 1.1848  | 1.9775  | 0.6753  | 0.9207  | 0.4330  | -0.3361 |
| EDRN 25           | Early CRC |     | 0.9472  | -0.2908 |         | 0.0004  | 1.1918  | -1.4424 |
| EDRN 26           | Early CRC |     | 1.7380  |         | 0.2816  | 0.5101  | 1.5986  | -0.7697 |
| EDRN 27           | Early CRC |     | -0.3751 | 0.3158  | -1.1215 |         | -1.3001 | -0.7820 |
| EDRN 28           | Early CRC |     | 1.5700  | 1.9845  | 0.8024  | 2.4272  | 3.0571  | -1.3883 |
| EDRN 29           | Late CRC  |     | -0.0718 | 0.5667  | 0.4602  | 0.9903  | -0.2374 | -0.5998 |
| EDRN 30           | Late CRC  |     | 1.6812  | 0.3498  | 1.1439  | 1.2765  | 2.1444  | -1.9185 |
| EDRN 31           | Late CRC  |     | 0.8333  | 0.6356  | -0.1533 | 1.2136  |         | 0.0186  |
| EDRN 32           | Late CRC  |     | 0.1510  |         | 0.6289  | 0.8039  | 1.3042  | 0.8091  |
| EDRN 33           | A-Adenoma |     | 1.1201  | 3.1958  | 0.4048  | 0.7011  | 2.0672  | -1.9057 |
| EDRN 34           | A-Adenoma |     | 0.7766  | 0.9132  | 0.7443  | 1.1002  | 1.5045  | -0.0806 |
| EDRN 35           | A-Adenoma |     | 0.6064  | 0.8508  | 0.7819  | 1.3317  | 0.6074  | -0.3557 |
| EDRN 36           | A-Adenoma |     | 1.5709  | 0.6640  | -0.5314 | 2.1793  | 2.2802  | -0.6812 |
| EDRN 37           | Adenomas  |     | 2.2554  | 1.4195  | 0.1411  | -0.1458 | 1.6332  | -0.9941 |
| EDRN 38           | Adenomas  |     | 1.2126  | 1.6999  |         | 2.7119  |         |         |
| EDRN 39           | Adenomas  |     | 1.5205  | 1.9583  |         | 0.3841  | 0.9037  | 2.1854  |
| EDRN 40           | Adenomas  |     | -4.4922 | -0.3482 | 1.0543  | -2.8136 | -2.6719 | -2.3430 |
| EDRN 41           | Sv normal |     | 2.2519  | 3.1669  | 1.5778  | 1.3912  | 1.4122  | -0.2225 |
| EDRN 42           | Sv normal |     | 1.0112  | 2.0870  |         | 0.7060  | 1.1890  | 1.0116  |
| EDRN 43           | Sv normal |     | 1.4049  | 1.0214  | 0.3761  | 1.3216  | 1.1051  | -1.7389 |
| EDRN 44           | Sv normal |     | 0.3725  | -0.0439 | 0.2847  | -0.1620 | 0.7197  | 0.1887  |
| EDRN 45           | Sc normal |     | 1.5178  | 0.6490  |         | 1.9229  | 1.5501  |         |
| EDRN 46           | Sc normal |     | 0.0265  | 0.8393  |         | -1.7095 | -2.5444 | -0.2842 |
| EDRN 47           | Sc normal |     | 0.7985  | -1.2987 | 1.8349  | 0.6748  | 0.5005  | -1.7684 |
| EDRN 48           | Sc normal |     | 1.1646  | -0.6218 | 0.7576  |         | 1.2787  | -0.3448 |
| EDRN 49           | Early CRC |     | 1.2736  | 0.4976  |         | 1.1451  | 1.3070  | -1.4132 |
| EDRN 50           | Early CRC |     | -0.5770 | 0.3197  |         | -0.1104 | -1.7991 | -0.6085 |
| EDRN 51           | Early CRC |     | 0.8393  | 1.6349  | 1.9506  | 1.2477  | 1.2077  | -1.3750 |
| EDRN 52           | Early CRC |     | 1.1121  |         |         | 1.3315  | 1.4693  | 0.1320  |
| EDRN 53           | Late CRC  |     | 1.4327  |         | 1.3806  | 0.3972  | 1.3403  | -0.1499 |
| EDRN 54           | Late CRC  |     | 1.0846  | 0.4533  | 2.1923  | 0.3799  | 0.4989  | -0.9532 |
| EDRN 55           | Late CRC  |     | 1.1299  | 1.1200  |         | 0.1895  | 0.8748  | -0.6911 |
| EDRN 56           | Late CRC  |     | 0.6402  | 0.2063  | 2.0421  | 1.5283  | 0.8708  | -0.0004 |
| EDRN 57           | A-Adenoma |     | 1.0357  | -0.3729 | 1.0007  | 0.7421  | 2.0374  | -0.4376 |
| EDRN 58           | A-Adenoma |     | 1.2482  | 0.3329  |         | 1.5372  | 0.8808  | -0.0219 |
| EDRN 59           | A-Adenoma |     | 0.5532  | 1.2285  |         | 0.7393  | 2.0617  | -1.8640 |
| EDRN 60           | A-Adenoma |     | 1.7116  | 0.5077  | -0.6007 | 2.4597  | 0.8663  | -1.4221 |
| EDRN 61           | Adenomas  |     | 0.4097  |         | -0.1267 | 0.1427  | 1.6758  | -0.5071 |
| EDRN 62           | Adenomas  |     | 0.4902  | 1.0503  | 0.3444  | -0.1876 | 1.3908  | -0.1286 |
| EDRN 63           | Adenomas  |     | 0.6558  | 0.1522  | -0.0412 | 0.8260  | 0.6730  | -0.2484 |
| EDRN 64           | Adenomas  |     | 0.2564  |         | -0.0226 | 0.3526  | 0.7586  | -0.8190 |
| EDRN 65           | Sv normal |     | 0.9105  | 1.3624  | 0.2254  | -0.7581 | 0.8522  | -0.4754 |
| EDRN 66           | Sv normal |     | 0.6477  | 0.9488  | 0.7432  | 0.7337  | 0.4254  | -0.8130 |
| EDRN 67           | Sv normal |     | 0.4000  | 1.0209  | -0.9520 | 0.6473  | 0.2885  | 0.0916  |

| Sample ID         | Status    | SMO | SOX2    | SPP1    | SPP1    | SSBP2   | SV2A    | TBC1D3  |
|-------------------|-----------|-----|---------|---------|---------|---------|---------|---------|
| Confirmed in EDRN |           |     |         | v       |         |         | v       |         |
| EDRN 68           | Sv normal |     | 0.9098  | 1.5732  | 0.6075  | 0.7059  | 0.5580  | 0.2688  |
| EDRN 69           | Sc normal |     |         | 1.0378  | 0.0591  | 0.6340  | 0.3194  | -0.2451 |
| EDRN 70           | Sc normal |     | 0.9176  | 1.9761  | 0.7233  | 1.6201  | 1.3142  | -0.8669 |
| EDRN 71           | Sc normal |     | 1.0679  | 1.0301  | 0.2984  | 0.7579  | 0.9215  | -1.6780 |
| EDRN 72           | Sc normal |     | 0.6983  | 1.4445  | -0.0917 | 1.1935  | 0.6969  | -0.3606 |
| EDRN 73           | Early CRC |     | 1.2569  | 2.8349  | 1.4103  | 1.7436  | 2.2738  | 0.1172  |
| EDRN 74           | Early CRC |     | 0.3651  | 0.9572  | -1.0532 | 1.5697  | 1.4285  | 0.2795  |
| EDRN 75           | Early CRC |     | 1.1092  | 0.6071  | -0.8141 | 1.8085  | 0.9208  | -0.5455 |
| EDRN 76           | Early CRC |     | 0.6192  | 1.0941  | 1.7095  | 0.8180  | 2.1728  | -0.9363 |
| EDRN 77           | Late CRC  |     | 0.9506  | 1.1541  | -0.2475 | -1.2238 | 0.5151  |         |
| EDRN 78           | Late CRC  |     | 1.3246  | 0.8433  | -0.2701 | 1.4410  | 1.8424  | -0.5656 |
| EDRN 79           | Late CRC  |     | 1.9468  | 2.1585  |         | 2.3662  | 2.0348  | -0.4643 |
| EDRN 80           | Late CRC  |     | 1.6865  | 1.6605  | 3.3276  | 1.0597  | 1.9569  | -0.6951 |
| EDRN 81           | A-Adenoma |     | 1.2250  | 1.6202  | -1.2455 |         | 1.4096  | -0.4694 |
| EDRN 82           | A-Adenoma |     | 2.5870  | 2.5430  | 1.0354  | -0.0415 | 1.2918  | 0.1868  |
| EDRN 83           | A-Adenoma |     | 0.5345  | 2.0830  | -1.0585 |         | 1.2330  | -0.1989 |
| EDRN 84           | A-Adenoma |     | 1.3285  | -1.2272 | 0.7115  | -2.6568 | -0.2097 | -0.4243 |
| EDRN 85           | Adenomas  |     | 0.3572  | 1.4734  | 0.4939  | -0.0768 | 1.3677  | 0.1116  |
| EDRN 86           | Adenomas  |     | 0.6192  | 1.2914  |         | -0.2352 | 1.3461  | -0.4707 |
| EDRN 87           | Adenomas  |     | 0.6195  | 0.5723  |         | 1.6706  | 0.6959  | -0.7042 |
| EDRN 88           | Adenomas  |     | 1.3374  | 1.6214  | 0.0939  | 1.9733  | 1.0153  | -0.3701 |
| EDRN 89           | Sv normal |     | 0.2521  | 0.1228  | 1.1623  | 0.2345  | -0.5104 | -0.7956 |
| EDRN 90           | Sv normal |     | 0.9317  | 0.5689  | 1.9456  | 1.0953  | 1.2030  | -0.1646 |
| EDRN 91           | Sv normal |     | 0.8253  | 0.4528  | 1.7059  | 1.7276  | 1.1477  | -1.1982 |
| EDRN 92           | Sv normal |     | 0.9356  | 1.4733  | -2.0556 |         | 0.5515  | -0.7465 |
| EDRN 93           | Sc normal |     | 1.0065  | 0.3387  | 3.1102  | 0.8509  | 0.6591  | -1.7935 |
| EDRN 94           | Sc normal |     | 0.4030  | 0.4719  | 0.1960  | 0.5226  | -2.0860 | -1.4980 |
| EDRN 95           | Sc normal |     | 0.9965  | -0.6241 | 0.9677  | 0.6657  | 1.4512  |         |
| EDRN 96           | Sc normal |     | -3.6260 | -2.1877 | 0.1122  | 0.6605  | -2.2208 | -2.0610 |
| EDRN 97           | Early CRC |     | 1.3792  | 1.9367  | 0.8197  |         | 1.6993  | -0.1268 |
| EDRN 98           | Early CRC |     | 0.2971  | 1.9136  | 0.7867  | 1.9862  | 2.2554  | -0.9066 |
| EDRN 99           | Early CRC |     | -0.2252 | 2.1286  |         | -0.7753 | 0.8058  | -0.4241 |
| EDRN 100          | Early CRC |     | 1.0689  | 1.0144  | -0.6013 | 1.4063  | 1.1739  | -0.3019 |
| EDRN 101          | Late CRC  |     | 0.1503  | 1.0634  | 0.3319  | 1.8362  | 0.3939  | -0.8563 |
| EDRN 102          | Late CRC  |     | 1.2772  | 1.6491  | 0.8103  | 2.1446  | 1.8889  | -1.1866 |
| EDRN 103          | Late CRC  |     | 0.3881  | 0.6490  | -0.2642 | 0.8291  | 0.1578  | -0.5300 |
| EDRN 104          | Late CRC  |     | 1.0918  | 0.8662  |         | 0.0835  | 0.2499  | -1.1551 |
| EDRN 105          | A-Adenoma |     | 1.8585  | 1.4757  | -0.8235 | 1.9265  | 1.1930  | -0.5292 |
| EDRN 106          | A-Adenoma |     | 1.0282  | 1.1037  | 0.8993  |         |         | -0.9260 |
| EDRN 107          | A-Adenoma |     | 1.0982  | 0.6162  | 1.9507  | 0.7066  | 1.3564  | -0.6388 |
| EDRN 108          | A-Adenoma |     | 1.8064  | 1.5700  | 0.8377  | -0.1862 | 2.0665  | -0.5530 |
| EDRN 109          | Adenomas  |     | 1.8787  | 1.2320  | -0.4239 | 0.3662  | 1.8022  | -0.8545 |
| EDRN 110          | Adenomas  |     | 0.5961  | 1.2751  | 0.8379  |         | -0.5331 | -0.3916 |
| EDRN 111          | Adenomas  |     | 2.1635  | 2.2144  | -0.8454 |         | 2.1489  | -1.3616 |
| EDRN 112          | Adenomas  |     | -2.6034 | -0.7919 | 2.2710  | -0.9926 | -2.3215 | 0.5168  |

| Sample ID         | Status    | SMO | SOX2    | SPP1    | SPP1    | SSBP2   | SV2A    | TBC1D3  |
|-------------------|-----------|-----|---------|---------|---------|---------|---------|---------|
| Confirmed in EDRN |           |     |         | v       |         |         | v       |         |
| EDRN 113          | Sv normal |     | 0.9206  | -0.0321 | 1.3523  | 1.2667  | 0.6965  |         |
| EDRN 114          | Sv normal |     | 0.5275  | -0.2556 | 0.3796  | 0.7816  | 1.2392  | -0.4692 |
| EDRN 115          | Sv normal |     | 0.9645  | 0.1771  | 0.3778  | -0.0153 | 0.4239  | -1.2119 |
| EDRN 116          | Sv normal |     | 0.2533  | -0.5420 | 0.7829  | 0.3878  | 0.5410  | -0.3323 |
| EDRN 117          | Sc normal |     |         | 1.3086  | 0.5645  | 1.7342  | 0.7888  | -0.3462 |
| EDRN 118          | Sc normal |     | 1.7381  | 0.9715  | 1.0229  | 1.0409  | 1.0297  | -0.7693 |
| EDRN 119          | Sc normal |     | 1.0444  | 0.0856  | 0.1124  | 0.3442  | 0.4214  | -0.5593 |
| EDRN 120          | Sc normal |     | 0.1460  | 0.2747  | 0.5599  | 0.0145  | 0.9140  | -0.1360 |
| EDRN 121          | Early CRC |     | 1.3498  | 0.7582  | 1.0202  | 0.2323  | 1.5177  | -0.5558 |
| EDRN 122          | Early CRC |     | 1.3993  | 0.8075  | 0.2210  | 0.8441  | 0.2047  | -1.0463 |
| EDRN 123          | Early CRC |     | 0.5956  | 1.7464  |         | -0.1980 | 1.1342  | -0.8502 |
| EDRN 124          | Early CRC |     | 1.0019  | 2.3403  | 0.4022  | 0.3209  | 1.3065  | -0.0227 |
| EDRN 125          | Late CRC  |     | 0.7107  | 0.9735  | 0.3742  | 0.3603  | 1.3218  | -0.8410 |
| EDRN 126          | Late CRC  |     | -0.8518 | 0.5845  | 0.7831  | 0.4874  | 0.5805  | -0.3207 |
| EDRN 127          | Late CRC  |     | 0.6756  | 0.8970  | 0.4650  | 2.5517  | 1.9004  | 0.0832  |
| EDRN 128          | Late CRC  |     | 1.5201  | 1.8945  | 0.5437  | 1.4873  | 1.9256  | -0.9274 |
| EDRN 129          | A-Adenoma |     | 1.0920  | 2.1406  | 1.2301  | 1.7175  | 1.8336  | -1.2361 |
| EDRN 130          | A-Adenoma |     | 0.4180  | 1.6330  | 1.0541  | 1.4663  | 1.0040  | -0.4458 |
| EDRN 131          | A-Adenoma |     | 1.4046  | 1.3063  | 0.6952  | 0.2858  | 1.8524  | -1.1067 |
| EDRN 132          | A-Adenoma |     | 0.9814  | 1.6847  | 0.1676  | 0.8552  | 1.1988  | -0.8416 |
| EDRN 133          | Adenomas  |     | -0.2328 | -0.2526 | -0.5804 | 0.0537  | 1.4550  | -0.9075 |
| EDRN 134          | Adenomas  |     | 0.6784  | 0.5741  | 2.5250  | 1.2558  | 1.5963  | -0.1597 |
| EDRN 135          | Adenomas  |     | 2.1153  | 0.8038  | 1.7973  | 2.6910  | 1.4019  | -1.0396 |
| EDRN 136          | Adenomas  |     | 0.2831  | 4.1933  | -0.6636 | 1.0676  | -0.4303 | -1.7261 |
| EDRN 137          | Sv normal |     | 0.0382  | -1.1762 | -1.1482 | 2.0172  | 0.6165  | -0.3241 |
| EDRN 138          | Sv normal |     | 0.3020  | 0.0783  | 0.3860  | -0.2328 | 0.4239  | -0.8790 |
| EDRN 139          | Sv normal |     | 0.6161  | 0.8760  | -0.3328 | 0.4476  | 0.0643  | -0.9788 |
| EDRN 140          | Sv normal |     | 0.7933  | 0.3214  | 2.8303  | 0.8909  | 0.0293  | -0.1273 |
| EDRN 141          | Sc normal |     | 1.3102  | 0.0345  | 0.5112  | 0.7359  | 0.4492  | -0.5909 |
| EDRN 142          | Sc normal |     | 0.7446  | -0.4437 | -0.1740 | -2.2376 | -0.9952 | 1.6646  |
| EDRN 143          | Sc normal |     | 0.9836  | -0.7869 | -0.5229 | 1.1914  | 0.5872  |         |
| EDRN 144          | Sc normal |     | 1.6623  | 0.9155  | 0.6564  | -0.0361 | 0.5116  | -0.8702 |
| EDRN 145          | Early CRC |     | 0.3271  | 2.0218  | 2.7576  | 1.8026  | 1.9551  | -1.2878 |
| EDRN 146          | Early CRC |     | -0.1163 | 0.6412  | -0.3255 | -0.0993 | 1.5545  | -1.2651 |
| EDRN 147          | Early CRC |     | 0.5165  | 3.1269  | 2.9706  | 3.3981  | 2.2024  | 0.2624  |
| EDRN 148          | Early CRC |     | 0.9554  | 1.4616  | 1.4081  | 1.9387  | 1.6930  | -0.6304 |
| EDRN 149          | Late CRC  |     | 1.5170  | 0.9361  | 1.0403  | 0.6369  | 0.7553  | 0.7553  |
| EDRN 150          | Late CRC  |     | 1.2773  | 1.9206  | 2.5278  | 0.8321  | 1.5651  | 0.1641  |
| EDRN 151          | Late CRC  |     | 1.1742  | 2.4293  | 0.4499  | 1.8678  | 1.7334  | 0.5099  |
| EDRN 152          | Late CRC  |     | 0.4786  | 1.0206  | -2.0891 | 1.2727  | 0.8058  | -0.3365 |
| EDRN 153          | A-Adenoma |     | 0.3860  | 0.5863  |         | 1.0628  | -0.5959 | -0.2565 |
| EDRN 154          | A-Adenoma |     | -0.1434 | 1.0982  |         | 0.0231  | 0.5396  | -1.1080 |
| EDRN 155          | A-Adenoma |     | 0.6028  | 0.9606  |         | 0.1502  | 1.1143  | -0.5219 |
| EDRN 156          | A-Adenoma |     | 0.6898  | 2.1582  | -1.9067 | 0.6580  |         | 0.0197  |
| EDRN 157          | Adenomas  |     | 1.0092  | 1.5431  | 0.4117  | 1.9364  | 1.3317  | -1.7287 |

| Sample            | ID  | Status    | SMO | SOX2    | SPP1    | SPP1    | SSBP2   | SV2A    | TBC1D3  |
|-------------------|-----|-----------|-----|---------|---------|---------|---------|---------|---------|
| Confirmed in EDRN |     |           |     |         | v       |         |         | v       |         |
| EDRN              | 158 | Adenomas  |     | 3.8982  | -0.5138 | -1.2252 | 0.5183  | 1.2776  | -1.4520 |
| EDRN              | 159 | Adenomas  |     |         | -0.0467 | 0.1303  | 0.3531  | 0.4481  | -1.6371 |
| EDRN              | 160 | Adenomas  |     | 0.4407  | -1.7323 | -0.3962 | -0.1409 | 0.0918  | -1.5783 |
| EDRN              | 161 | Sv normal |     | -0.3519 | 0.9800  |         | 0.1557  | 0.3437  | -1.1510 |
| EDRN              | 162 | Sv normal |     | -0.5570 | 0.6607  | 0.6311  | 0.2867  | 0.1056  | 0.5324  |
| EDRN              | 163 | Sv normal |     | -0.8528 | -0.3871 |         | 0.6066  | 0.1811  | -0.5440 |
| EDRN              | 164 | Sv normal |     | 1.3428  | 0.2735  | 0.8160  | 0.4364  | 0.2369  | -0.2233 |
| EDRN              | 165 | Sc normal |     | 1.8490  | -0.6761 | -0.1531 | -1.6560 | 0.0734  | -0.9183 |
| EDRN              | 166 | Sc normal |     | 1.4353  | 0.8169  | 1.3587  | 0.8892  | 0.0929  | 1.4668  |
| EDRN              | 167 | Sc normal |     | 1.8994  | 1.0017  | 0.4419  | 0.7289  | 1.3497  | -1.8295 |
| EDRN              | 168 | Sc normal |     | 0.9612  | 1.6228  | 1.2098  |         | 1.5370  | -1.8292 |
| EDRN              | 169 | Early CRC |     | 0.9375  | 1.5346  | 0.4221  | 2.4358  | 2.3332  | -1.7747 |
| EDRN              | 170 | Early CRC |     | 0.6297  | 1.3458  | -0.3105 | 1.6198  | 0.8124  | -2.0720 |
| EDRN              | 171 | Late CRC  |     | -0.0165 | 1.2988  | 0.4017  | 2.5962  | 1.1602  | -0.6297 |
| EDRN              | 172 | Late CRC  |     | 1.4490  | 4.4924  | 2.1358  | -0.0814 | 2.7232  | -0.7485 |
| EDRN              | 173 | A-Adenoma |     | 0.7987  | 0.2586  | -0.4016 | 1.7304  | 1.4699  | 0.2044  |
| EDRN              | 174 | A-Adenoma |     | 0.2783  | 0.1032  | 0.8789  | 0.5121  | 0.8070  | 0.3252  |
| EDRN              | 175 | Adenomas  |     | 1.2946  | 0.1155  | -0.0886 | -2.8944 | 0.3701  | -0.2422 |
| EDRN              | 176 | Adenomas  |     | 1.2938  | 1.7604  | 1.1201  | 1.2432  | 0.3335  | -0.2820 |
| EDRN              | 177 | Sv normal |     | 1.0911  | -0.2109 | 1.5956  | 2.3696  | 1.5317  | -0.2822 |
| EDRN              | 178 | Sv normal |     | 0.5409  | 0.1622  | 1.2744  | -0.7017 | 0.3526  | -0.0238 |
| EDRN              | 179 | Sc normal |     | -0.0215 | -0.9186 | -0.5944 | -1.5511 | -1.5671 | -1.9282 |
| EDRN              | 180 | Sc normal |     | 1.5202  | 1.0099  | -0.0624 | 1.8492  | 0.4184  | 0.1604  |



| Sample ID         | Status  | TCF4    | TMSB10  | UBE2S  | VIP     | VWF     | WDR1   | ZBTB22   |
|-------------------|---------|---------|---------|--------|---------|---------|--------|----------|
| Confirmed in EDRN |         |         |         | v      | v       | v       | v      |          |
| CHS 1             | Control | 2.0203  | -4.4398 | 7.1222 | 4.0035  | -1.1230 | 7.8866 | -13.3125 |
| CHS 2             | Cancer  | 1.0787  | -5.8993 | 7.7083 | 2.6046  | -1.0548 | 6.7944 | -13.3397 |
| CHS 3             | Cancer  | 0.8014  | -4.1890 | 6.9805 | 2.5923  | -1.0811 | 9.2785 | -13.3248 |
| CHS 4             | Control | 0.6098  | -6.3563 | 6.0092 | 3.3137  | -0.7231 | 6.6981 | -14.2326 |
| CHS 5             | Control | 0.9267  | -5.7517 | 7.7013 | 3.3055  | -2.2598 | 7.3237 | -11.1444 |
| CHS 6             | Cancer  | 1.7869  | -5.9413 | 7.5684 | 2.7593  | -2.8841 | 7.4674 | -12.4197 |
| CHS 7             | Control | 0.9182  | -6.2606 | 8.0749 | 2.5071  | -2.1527 | 6.6819 | -12.8253 |
| CHS 8             | Cancer  | 1.4210  | -5.3311 | 7.9360 | 4.4885  | -1.0085 | 7.3928 | -13.5722 |
| CHS 9             | Cancer  | 1.5138  | -5.5664 | 7.9122 | 3.1146  | -0.8964 | 7.8696 | -12.3062 |
| CHS 10            | Control | 1.5035  | -6.7300 | 8.4182 | 2.9061  | -2.1139 | 7.5696 | -12.5830 |
| CHS 11            | Control | -0.4035 | -6.8729 | 5.8525 | 2.9405  | -1.6040 | 5.4017 | -13.7308 |
| CHS 12            | Cancer  | 1.5569  | -5.5543 | 7.9242 | 1.8950  | -1.7359 | 7.0189 | -13.3641 |
| CHS 13            | Cancer  | 3.5195  | -5.6215 | 8.8014 | 2.4679  | -1.5295 | 7.5550 | -13.1891 |
| CHS 14            | Control | 2.6176  | -6.0749 | 7.3118 | 3.3821  | -1.6702 | 7.6312 | -13.7475 |
| CHS 15            | Control | 1.8564  | -7.1325 | 8.4319 | 3.1497  | -1.7887 | 7.3987 | -15.1132 |
| CHS 16            | Cancer  | 2.4307  | -5.5190 | 8.8415 | 2.9747  | -1.7974 | 6.9790 | -14.0323 |
| CHS 17            | Cancer  | 3.0400  | -5.6415 | 8.6803 | 1.8617  | -1.8515 | 7.7644 | -12.5420 |
| CHS 18            | Control | 2.7445  | -4.8465 | 8.3144 | 2.8863  | -1.0121 | 7.5371 | -13.8976 |
| CHS 19            | Cancer  | 2.0270  | -6.3486 | 7.2040 | 2.4469  | -0.9804 | 6.9251 | -14.3671 |
| CHS 20            | Control | 0.4023  | -7.8684 | 5.6185 | 1.6665  | -1.4269 | 5.2942 | -14.6286 |
| CHS 21            | Cancer  | 3.0954  | -5.6100 | 9.0877 | 2.9687  | -2.1430 | 8.2815 | -13.2771 |
| CHS 22            | Control | 0.5469  | -6.5419 | 7.5588 | 1.5595  | -1.0133 | 5.6712 | -14.2119 |
| CHS 23            | Cancer  | 2.4112  | -5.4763 | 9.1924 | 3.5426  | -1.4783 | 7.4480 | -14.1480 |
| CHS 24            | Control | -2.2334 | -8.2185 | 5.5035 | -0.4870 | -1.6447 | 2.5951 | -16.0782 |
| CHS 25            | Cancer  | 2.1458  | -5.4729 | 7.4376 | 2.4672  | -1.8817 | 7.1574 | -13.6026 |
| CHS 26            | Control | 2.2463  | -5.1530 | 7.3033 | 2.3141  | -2.4578 | 7.4742 | -13.5705 |
| CHS 27            | Cancer  | 1.5381  | -6.4958 | 6.8736 | 0.8075  | -1.7394 | 6.8542 | -13.0139 |
| CHS 28            | Control | 2.5998  | -4.2821 | 7.9308 | 4.0193  | -2.9031 | 8.5533 | -13.1963 |
| CHS 29            | Cancer  | 1.9255  | -5.6371 | 6.7017 | 3.3510  | -0.8959 | 7.1418 | -13.0814 |
| CHS 30            | Control | 1.2048  | -6.0541 | 6.9840 | 2.5464  | -0.7973 | 6.9530 | -13.6002 |
| CHS 31            | Control | 2.3669  | -5.9605 | 8.4516 | 3.1826  | -2.1523 | 7.5531 | -11.7465 |
| CHS 32            | Cancer  | 1.2987  | -6.2636 | 7.6138 | 2.3397  | -1.7694 | 6.8004 | -13.4693 |
| CHS 33            | Cancer  | 2.5233  | -5.5165 | 8.0682 | 2.3498  | -1.7638 | 7.8009 | -13.3988 |
| CHS 34            | Control | 1.6768  | -6.8437 | 6.4413 | 1.8970  | -2.0201 | 6.5066 | -13.5109 |
| CHS 35            | Control | 0.1307  | -7.0259 | 7.1395 | 2.1694  | -0.3866 | 6.2826 | -14.1420 |
| CHS 36            | Cancer  | 0.9361  | -5.4256 | 7.5105 | 2.7317  | -0.1401 | 6.9429 | -13.5144 |
| CHS 37            | Cancer  | 1.9159  | -6.1716 | 7.9529 | 2.2957  | -1.2696 | 6.5895 | -14.6518 |
| CHS 38            | Control | 1.1148  | -6.4021 | 7.4550 | 1.7485  | -0.8138 | 6.5480 | -14.3626 |
| CHS 39            | Control | 0.6150  | -6.6859 | 6.9829 | 1.7401  | -2.1007 | 5.6802 | -14.0367 |
| CHS 40            | Cancer  | 1.0846  | -5.9263 | 8.5257 | 3.1605  | -1.3398 | 7.2559 | -13.1979 |
| CHS 41            | Control | 1.2284  | -6.6712 | 7.4949 | 2.9696  | -1.9574 | 6.5783 | -13.8368 |
| CHS 42            | Cancer  | 0.8354  | -7.1131 | 8.5890 | 1.7150  | -0.8625 | 7.0805 | -14.2050 |
| CHS 43            | Control | 1.3620  | -6.3868 | 7.5137 | 3.4762  | -1.5960 | 7.8804 | -13.9619 |
| CHS 44            | Cancer  | 1.0914  | -6.0790 | 7.9006 | 2.5087  | -1.7920 | 6.7519 | -12.8419 |
| CHS 45            | Control | 1.7571  | -5.7388 | 7.5190 | 2.0088  | -2.3171 | 6.4081 | -13.9348 |

| Sample ID         | Status  | TCF4    | TMSB10  | UBE2S  | VIP     | VWF     | WDR1   | ZBTB22   |
|-------------------|---------|---------|---------|--------|---------|---------|--------|----------|
| Confirmed in EDRN |         |         |         | v      | v       | v       | v      |          |
| CHS 46            | Cancer  | 2.2414  | -4.1316 | 8.9132 | 5.9158  | -2.5314 | 7.5086 | -13.4252 |
| CHS 47            | Cancer  | 1.0963  | -6.0945 | 8.5793 | 3.9745  | -1.5917 | 7.1019 | -13.6859 |
| CHS 48            | Control | 1.2564  | -6.2609 | 7.8721 | 3.1615  | 0.1062  | 7.0597 | -13.4005 |
| CHS 49            | Cancer  | 1.0642  | -7.6539 | 8.2590 | 2.3170  | -1.1761 | 6.6869 | -13.4001 |
| CHS 50            | Control | 1.9000  | -6.7996 | 7.3797 | 2.4895  | -1.6705 | 7.1266 | -14.4875 |
| CHS 51            | Cancer  | 1.2379  | -5.5598 | 8.1417 | 2.6906  | -1.6384 | 6.8006 | -14.0843 |
| CHS 52            | Control | 1.9372  | -6.6426 | 7.4579 | 2.3967  | -1.8002 | 6.8301 | -13.9799 |
| CHS 53            | Control | 3.1795  | -6.5101 | 7.9637 | 3.1768  | -3.1272 | 6.7462 | -14.4971 |
| CHS 54            | Cancer  | 1.6672  | -6.3158 | 8.4963 | 3.5313  | -1.8468 | 7.2035 | -13.8189 |
| CHS 55            | Cancer  | 1.6521  | -6.6668 | 9.5742 | 2.0083  | -2.0583 | 6.7292 | -14.1530 |
| CHS 56            | Control | 2.0480  | -5.9613 | 7.3900 | 0.7747  | -2.5110 | 6.7538 | -13.2872 |
| CHS 57            | Control | 1.8283  | -5.4354 | 8.3161 | 2.9347  | -2.1442 | 6.4204 | -14.7101 |
| CHS 58            | Cancer  | 2.5993  | -6.6087 | 8.5192 | 3.0978  | -2.2630 | 7.0542 | -12.7628 |
| CHS 59            | Cancer  | 2.1609  | -5.7657 | 7.5853 | 2.9515  | -2.2953 | 7.0370 | -14.2163 |
| CHS 60            | Control | 1.6516  | -5.1725 | 8.7150 | 2.7506  | -1.6620 | 6.7313 | -14.4344 |
| CHS 61            | Cancer  | 0.6218  | -6.2601 | 7.5395 | 3.1533  | -0.1741 | 7.0023 | -12.5967 |
| CHS 62            | Control | -0.0489 | -7.1098 | 6.7433 | 1.1081  | -1.4040 | 5.4609 | -13.1604 |
| CHS 63            | Cancer  | 1.6883  | -3.4659 | 8.1949 | 3.9161  | -0.9558 | 8.6887 | -12.4578 |
| CHS 64            | Control | 0.5590  | -6.7792 | 5.5683 | 0.8717  | -1.0023 | 5.8398 | -13.2037 |
| CHS 65            | Cancer  | 1.9667  | -4.3637 | 7.8577 | 4.5562  | -1.0997 | 8.7116 | -13.1238 |
| CHS 66            | Control | 2.3826  | -4.1192 | 7.1970 | 4.0678  | -1.6400 | 8.2230 | -13.4964 |
| CHS 67            | Control | -1.5598 | -7.2274 | 5.5102 | 2.0800  | -0.7820 | 5.1308 | -13.2493 |
| CHS 68            | Cancer  | 0.8850  | -7.0162 | 6.7288 | 3.0146  | -0.7423 | 7.2150 | -12.7656 |
| CHS 69            | Cancer  | 1.0642  | -4.9156 | 6.4207 | 2.7351  | -0.7375 | 7.9938 | -12.8710 |
| CHS 70            | Control | 1.4819  | -5.7570 | 6.8036 | 2.5942  | -0.6003 | 7.4644 | -13.3481 |
| CHS 71            | Cancer  | 2.1611  | -6.3590 | 9.3693 | 3.6028  | -1.3190 | 7.3774 | -13.4261 |
| CHS 72            | Control | 2.0639  | -5.3271 | 8.0229 | 2.0312  | -2.3234 | 7.2362 | -13.8574 |
| CHS 73            | Control | -0.0100 | -8.3604 | 6.0859 | 0.8931  | -1.4407 | 5.6481 | -15.1143 |
| CHS 74            | Cancer  | 2.2552  | -4.0246 | 7.7121 | 4.3921  | -0.5104 | 7.6646 | -12.5350 |
| CHS 75            | Cancer  | 2.0875  | -5.3251 | 8.2077 | 4.0774  | -2.5012 | 8.5943 | -12.9699 |
| CHS 76            | Control | 0.8742  | -5.8300 | 6.5391 | 1.0659  | -1.0124 | 5.4931 | -14.2186 |
| CHS 77            | Control | 1.1479  | -7.3343 | 6.4175 | -0.0423 | -2.6738 | 5.8827 | -11.5105 |
| CHS 78            | Cancer  | 2.2610  | -5.4193 | 7.8177 | 2.2197  | -1.0230 | 7.0230 | -12.4321 |
| CHS 79            | Cancer  | 1.9739  | -5.8042 | 8.8201 | 4.0000  | -0.5460 | 7.6679 | -14.2977 |
| CHS 80            | Control | 1.6452  | -7.2084 | 8.9459 | 3.6953  | -0.7781 | 8.6890 | -12.5423 |
| CHS 81            | Control | 1.4506  | -5.9869 | 7.1049 | 2.4728  | -1.4067 | 5.9959 | -13.3653 |
| CHS 82            | Cancer  | 1.8754  | -5.8332 | 7.5026 | 2.4379  | -1.1828 | 7.3708 | -13.1372 |
| CHS 83            | Cancer  | 2.1905  | -4.5300 | 7.9776 | 2.7368  | -1.4465 | 6.8620 | -13.2120 |
| CHS 84            | Control | 1.7573  | -5.9474 | 8.0404 | 3.3596  | -1.3259 | 7.3951 | -15.0040 |
| CHS 85            | Cancer  | 1.6687  | -5.6368 | 7.1460 | 2.9385  | -1.0487 | 6.9210 | -14.4485 |
| CHS 86            | Control | 1.2802  | -6.5317 | 6.9989 | 2.5484  | -0.8169 | 6.0633 | -13.9583 |
| CHS 87            | Control | 1.1255  | -7.8230 | 7.1868 | 1.8848  | -2.4467 | 6.2537 | -14.7922 |
| CHS 88            | Cancer  | 0.3786  | -6.0789 | 7.3779 | 3.2894  | -0.6207 | 7.0351 | -12.9195 |
| CHS 89            | Control | 2.1940  | -4.7707 | 8.0791 | 3.8848  | -1.5788 | 6.7745 | -13.7618 |
| CHS 90            | Cancer  | 2.0893  | -5.4376 | 9.3305 | 3.9244  | -2.4300 | 7.8120 | -13.8128 |

| Sample ID Status  | TCF4    | TMSB10  | UBE2S  | VIP    | VWF     | WDR1   | ZBTB22   |
|-------------------|---------|---------|--------|--------|---------|--------|----------|
| Confirmed in EDRN |         |         | v      | v      | v       | v      |          |
| CHS 91 Cancer     | 0.9757  | -6.4838 | 7.0921 | 3.3022 | -1.2757 | 7.1010 | -13.6224 |
| CHS 92 Control    | 1.3947  | -6.0002 | 8.5029 | 2.6046 | -1.6590 | 6.9732 | -14.4332 |
| CHS 93 Control    | 0.4961  | -6.3793 | 7.5821 | 0.9159 | -3.0300 | 6.8462 | -13.1561 |
| CHS 94 Cancer     | 1.1592  | -5.2602 | 8.1017 | 2.6217 | -2.8071 | 7.7829 | -12.9432 |
| CHS 95 Control    | 1.9873  | -5.7562 | 7.8161 | 3.2742 | -2.3196 | 7.9097 | -13.7965 |
| CHS 96 Cancer     | 1.9339  | -6.0305 | 7.3685 | 2.3532 | -1.0927 | 6.7046 | -13.4045 |
| CHS 97 Cancer     | 1.2892  | -4.8364 | 6.3233 | 3.7667 | -2.4525 | 6.8863 | -12.3420 |
| CHS 98 Control    | -0.5705 | -6.1336 | 6.1105 | 1.6354 | -2.1726 | 5.3727 | -13.0839 |
| CHS 99 Cancer     | 0.9807  | -6.3308 | 7.7043 | 3.8014 | -0.2081 | 7.3278 | -12.6906 |
| CHS 100 Control   | 1.1703  | -5.7284 | 6.4161 | 3.1595 | -3.0140 | 7.1459 | -13.3175 |
| CHS 101 Cancer    | 2.0460  | -5.2971 | 8.1823 | 3.0443 | -0.8665 | 7.8585 | -12.4243 |
| CHS 102 Control   | 2.4077  | -5.3589 | 8.7798 | 3.3033 | -0.2542 | 8.3278 | -13.0837 |
| CHS 103 Cancer    | 1.9070  | -5.6725 | 7.7996 | 2.7034 | -0.1063 | 7.3939 | -14.1137 |
| CHS 104 Control   | 1.1730  | -6.9744 | 6.9193 | 1.4933 | -2.4965 | 6.1393 | -14.5144 |
| CHS 105 Cancer    | 2.4387  | -4.8161 | 8.2499 | 2.4528 | 0.4149  | 8.1935 | -13.4002 |
| CHS 106 Control   | 1.2205  | -7.6219 | 7.9582 | 1.6864 | -1.9775 | 5.7654 | -14.3090 |
| CHS 107 Cancer    | 1.6678  | -6.4343 | 7.7269 | 2.5257 | -0.9349 | 6.7648 | -13.3895 |
| CHS 108 Control   | 1.9815  | -5.1886 | 7.5682 | 3.2308 | -1.5298 | 6.7984 | -14.1345 |
| CHS 109 Control   | 0.7144  | -6.5770 | 7.4640 | 2.1180 | -2.3173 | 7.2715 | -13.3018 |
| CHS 110 Cancer    | 0.7907  | -6.1953 | 6.5751 | 1.6161 | -0.6666 | 6.4081 | -12.8914 |
| CHS 111 Control   | 0.8450  | -7.2075 | 8.1540 | 1.8363 | -1.6195 | 6.4669 | -14.4071 |
| CHS 112 Cancer    | 1.9120  | -5.3127 | 8.4260 | 4.4185 | -0.2531 | 7.5878 | -14.3062 |
| CHS 113 Control   | 3.0593  | -4.9795 | 8.9622 | 4.3624 | -2.6969 | 8.6198 | -13.9593 |
| CHS 114 Cancer    | 2.1263  | -6.8398 | 7.6103 | 1.3098 | -2.2146 | 6.4545 | -14.2170 |
| CHS 117 Control   | 1.3771  | -6.9074 | 8.1340 | 1.6289 | -2.0665 | 6.1828 | -14.1399 |
| CHS 118 Cancer    | 1.0982  | -6.0515 | 7.5272 | 2.2738 | -1.9117 | 6.9781 | -13.3016 |
| CHS 119 Cancer    | 1.7735  | -5.4405 | 7.9124 | 3.4552 | -2.2318 | 7.3253 | -12.9035 |
| CHS 120 Control   | 1.7675  | -5.9057 | 7.9376 | 3.6242 | -2.3161 | 7.1557 | -14.0412 |
| CHS 121 Control   | 1.8849  | -7.8525 | 6.9847 | 1.7720 | -2.0518 | 6.6465 | -14.0583 |
| CHS 122 Cancer    | 1.9769  | -6.9228 | 7.7502 | 2.3829 | -2.7244 | 6.6107 | -12.9358 |
| CHS 123 Cancer    | 2.4555  | -4.7334 | 7.7015 | 2.4271 | -0.6163 | 7.2416 | -12.2815 |
| CHS 124 Control   | 2.0117  | -5.9390 | 7.7760 | 2.4006 | -1.1468 | 7.7365 | -13.4711 |
| CHS 125 Cancer    | 1.2964  | -6.1918 | 8.0169 | 2.4380 | -0.5546 | 6.1092 | -14.0214 |
| CHS 126 Control   | 0.7489  | -6.2278 | 7.4352 | 2.3370 | -1.9135 | 7.5277 | -13.1623 |
| CHS 127 Cancer    | 2.3543  | -4.1847 | 7.0799 | 3.6692 | -2.8987 | 7.5534 | -12.6985 |
| CHS 128 Control   | -1.0570 | -7.1161 | 6.4510 | 1.4434 | -1.6531 | 4.7256 | -13.9077 |
| CHS 129 Control   | 0.1879  | -6.8318 | 6.6930 | 0.9292 | -2.3266 | 5.1635 | -12.7833 |
| CHS 130 Cancer    | 1.0792  | -6.2646 | 5.9735 | 2.1964 | -0.2939 | 5.1088 | -14.1251 |
| CHS 131 Cancer    | 1.7418  | -5.6943 | 8.3821 | 2.5322 | -0.3025 | 6.9143 | -13.7147 |
| CHS 132 Control   | 2.7653  | -5.2345 | 7.6712 | 3.1807 | -2.2668 | 7.9134 | -13.5660 |
| CHS 133 Cancer    | 0.0308  | -7.6982 | 7.0024 | 1.1857 | -0.6511 | 5.6584 | -13.3064 |
| CHS 134 Control   | 1.3061  | -6.2530 | 7.3679 | 2.1497 | -0.8618 | 6.6164 | -12.4320 |
| CHS 135 Cancer    | 1.6846  | -5.4400 | 7.4309 | 3.5078 | -1.7370 | 7.9349 | -14.2259 |
| CHS 136 Control   | 2.2044  | -4.2481 | 8.8188 | 3.9742 | -2.2202 | 8.2484 | -13.8376 |
| CHS 137 Cancer    | 1.5882  | -5.8790 | 7.4150 | 3.3082 | -2.0271 | 7.0238 | -12.9843 |

| Sample ID         | Status    | TCF4    | TMSB10  | UBE2S   | VIP     | VWF     | WDR1    | ZBTB22   |
|-------------------|-----------|---------|---------|---------|---------|---------|---------|----------|
| Confirmed in EDRN |           |         |         | v       | v       | v       | v       |          |
| CHS 138           | Control   | 1.8437  | -6.7266 | 8.0225  | 3.2836  | -2.3150 | 7.4909  | -13.7098 |
| CHS 139           | Cancer    | 1.8115  | -5.2764 | 8.2998  | 4.4945  | -1.4761 | 8.2945  | -14.6565 |
| CHS 140           | Control   | 1.7085  | -5.1544 | 8.3105  | 2.9512  | -0.7924 | 7.3206  | -14.2397 |
| CHS 141           | Cancer    | 1.1647  | -5.9582 | 8.9061  | 3.5958  | -0.9429 | 8.3010  | -13.4338 |
| CHS 142           | Control   | 1.4884  | -6.2312 | 8.2403  | 3.4141  | -2.5698 | 7.5193  | -14.1292 |
| CHS 143           | Cancer    | 1.5550  | -6.6299 | 7.9066  | 2.9926  | -1.7351 | 7.3577  | -14.1824 |
| CHS 144           | Control   | 2.3602  | -5.1041 | 8.1183  | 2.2844  | -0.8958 | 7.4466  | -13.5244 |
| CHS 145           | Cancer    | 0.8878  | -7.0584 | 9.3436  | 2.5425  | -1.6875 | 6.9281  | -14.2860 |
| CHS 146           | Control   | 1.6337  | -6.1083 | 8.8528  | 2.6116  | -2.3516 | 7.1591  | -13.1749 |
| CHS 147           | Cancer    | 1.8852  | -6.4962 | 5.9827  | 3.2452  | -1.3748 | 7.2120  | -14.2842 |
| CHS 148           | Control   | 2.7032  | -5.6073 | 7.7311  | 3.4798  | -1.6053 | 7.7577  | -14.0701 |
| CHS 149           | Control   | 1.6787  | -5.2512 | 7.1830  | 2.1871  | -1.3718 | 7.0688  | -13.6709 |
| CHS 150           | Cancer    | 1.5914  | -3.9845 | 6.7054  | 2.1060  | -1.2794 | 6.7364  | -13.8583 |
| CHS 151           | Control   | 1.2598  | -5.7020 | 7.6597  | 2.7656  | -0.8804 | 6.5771  | -13.9819 |
| CHS 152           | Cancer    | 1.2377  | -6.1001 | 8.2200  | 3.0580  | -1.7577 | 7.3029  | -13.9460 |
| CHS 153           | Control   | 0.5580  | -6.6285 | 6.5753  | 1.8251  | -1.4251 | 6.4053  | -13.4576 |
| CHS 154           | Cancer    | 1.6527  | -5.8192 | 8.0385  | 2.7170  | -1.5232 | 6.9274  | -13.5702 |
| CHS 155           | Cancer    | 2.3189  | -5.5620 | 8.5417  | 3.4389  | -1.7200 | 7.7033  | -12.8108 |
| CHS 156           | Control   | 1.5486  | -6.7966 | 7.9641  | 2.5575  | -1.4398 | 6.7081  | -13.6807 |
| CHS 157           | Cancer    | 0.8484  | -6.5401 | 7.4621  | 2.0509  | -1.6066 | 6.0042  | -12.8801 |
| CHS 158           | Control   | 1.9548  | -5.9258 | 7.6093  | 3.2406  | -1.4419 | 7.7920  | -12.8470 |
| CHS 159           | Cancer    | 1.6677  | -5.9740 | 7.6215  | 3.3273  | -1.8831 | 7.2606  | -13.4730 |
| CHS 160           | Control   | 0.7011  | -6.3074 | 7.0119  | 2.0806  | -1.3007 | 6.7663  | -12.9335 |
| EDRN 1            | Early CRC | 0.5791  |         | 2.3854  | 0.9891  |         | 0.5613  | 1.3991   |
| EDRN 2            | Early CRC | -1.6462 |         | -0.6083 | -2.0938 | 1.8285  | -2.9399 |          |
| EDRN 3            | Early CRC | 0.5135  |         | 2.3486  | 3.2295  | 0.5242  | 0.6064  | 1.1079   |
| EDRN 4            | Early CRC | 1.0975  |         | -0.5646 | 2.0348  | -0.2454 | -0.0686 |          |
| EDRN 5            | Late CRC  | 0.6501  |         | 0.9106  | 2.1532  | 1.5753  | 0.3575  | 1.4035   |
| EDRN 6            | Late CRC  | -0.0467 |         | 0.4867  | 1.9874  | 0.7364  | 0.8688  | 0.1167   |
| EDRN 7            | Late CRC  | 0.3670  |         | 0.7068  | 2.5321  | 1.6749  | 0.7274  | 0.5311   |
| EDRN 8            | Late CRC  | 0.4421  |         | 0.2406  | 2.4473  | 0.3818  | -0.1297 | -0.0454  |
| EDRN 9            | A-Adenoma | 0.2344  |         | 0.6171  | -0.5849 | 0.6598  | 0.1404  | -2.2516  |
| EDRN 10           | A-Adenoma | -0.1352 |         | 2.4428  | 1.1938  | 0.3756  | 0.5017  | 0.8100   |
| EDRN 11           | A-Adenoma | 1.1482  |         | 1.5025  | 1.5070  |         | 0.9479  | -1.0449  |
| EDRN 12           | A-Adenoma | 0.8170  |         | 1.7178  | 2.2499  | 1.3611  | 1.4527  | 0.7892   |
| EDRN 13           | Adenomas  | -1.4297 |         | -0.4528 | 1.9897  |         |         | -3.3042  |
| EDRN 14           | Adenomas  | -0.2229 |         | 1.3390  | 1.0116  | 1.5465  | 1.5253  |          |
| EDRN 15           | Adenomas  | -0.1485 |         | -0.1247 | 1.6332  | 0.1291  | 0.9236  |          |
| EDRN 16           | Adenomas  | 0.1068  |         | -0.1509 | 0.8207  | 1.6494  | 1.0003  |          |
| EDRN 17           | Sv normal | 0.3858  |         | 0.3279  | 0.3423  | -1.3553 | 0.5741  |          |
| EDRN 18           | Sv normal | -0.4377 |         | 0.8673  | 0.8134  | 1.0206  | 1.2926  |          |
| EDRN 19           | Sv normal | -0.2813 |         | 0.7521  | 0.1283  | 1.2963  | 0.1876  | 0.0973   |
| EDRN 20           | Sv normal | -0.0835 |         | 0.1583  | 0.4068  | -0.0319 | 0.4486  |          |
| EDRN 21           | Sc normal | 0.6709  |         | -0.0203 | -0.2609 | 0.6882  | 0.1284  |          |
| EDRN 22           | Sc normal | 0.2614  |         | 0.7005  | 1.3777  | 0.1900  | 0.0297  | 0.0809   |

| Sample ID         | Status    | TCF4    | TMSB10 | UBE2S   | VIP     | VWF     | WDR1    | ZBTB22  |
|-------------------|-----------|---------|--------|---------|---------|---------|---------|---------|
| Confirmed in EDRN |           |         |        | v       | v       | v       | v       |         |
| EDRN 23           | Sc normal | -0.3074 |        | -0.2253 | 1.8786  | 1.6633  | 0.2179  | -1.6513 |
| EDRN 24           | Sc normal | 0.3176  |        | 0.0575  | 1.3238  | 1.6616  | 0.3983  | 0.4130  |
| EDRN 25           | Early CRC | 0.8052  |        | 0.9702  | 2.1519  | 3.1493  | 0.3218  | 0.3819  |
| EDRN 26           | Early CRC | 0.7343  |        | 0.7150  | 1.8455  | -0.3689 | 0.9093  | 1.1730  |
| EDRN 27           | Early CRC | -1.2657 |        | -0.9624 | 1.5893  | 0.2403  | -1.6257 | -1.6041 |
| EDRN 28           | Early CRC | 1.4713  |        | 2.0072  | 2.9927  | 1.2454  | 1.7463  | -0.0522 |
| EDRN 29           | Late CRC  | -0.2682 |        | 0.4324  | 1.6740  | 0.6424  | 0.1397  | -0.9373 |
| EDRN 30           | Late CRC  | 1.0062  |        | 1.7818  | 2.2901  | 0.7648  | 0.8890  | -0.5821 |
| EDRN 31           | Late CRC  | 0.0373  |        | 1.1507  | 1.6607  | 0.9272  | 0.0275  | 0.6846  |
| EDRN 32           | Late CRC  | 0.3377  |        | 0.3266  | 0.5312  | 1.2281  | 0.7259  |         |
| EDRN 33           | A-Adenoma | -0.3294 |        | 1.0598  | 1.0688  | 3.2388  | 1.3871  | -0.9212 |
| EDRN 34           | A-Adenoma | 0.3955  |        | 0.1069  | 0.4161  | 1.6373  | 0.6270  | -0.5439 |
| EDRN 35           | A-Adenoma | 0.1577  |        | 1.0647  | 1.6862  | 0.7161  | 0.2387  | -1.3033 |
| EDRN 36           | A-Adenoma | 0.2824  |        | 0.9350  | 1.6442  | -0.8923 | 1.0892  | -0.4047 |
| EDRN 37           | Adenomas  |         |        | 1.0039  | 1.0802  | -0.0396 |         | -1.5819 |
| EDRN 38           | Adenomas  | 0.1658  |        |         |         | -0.6329 | 1.6855  | -0.1754 |
| EDRN 39           | Adenomas  | 0.3559  |        |         | 3.9497  | 0.0300  | 1.0966  | 0.8283  |
| EDRN 40           | Adenomas  | -3.1094 |        | 1.6640  | 2.8065  | 0.7882  | -2.8393 | 1.3298  |
| EDRN 41           | Sv normal | 0.3014  |        | 1.0183  | -1.1966 | 1.7109  | 1.1299  | -0.6653 |
| EDRN 42           | Sv normal | 0.5483  |        |         | -1.5524 | 2.5043  | 1.2858  | -0.3350 |
| EDRN 43           | Sv normal | 0.3141  |        | 0.0110  | 0.8231  |         | 0.5278  | -0.2855 |
| EDRN 44           | Sv normal | 0.8324  |        | 0.4113  | -0.3919 |         | 0.2420  | 1.1490  |
| EDRN 45           | Sc normal | 0.5701  |        |         | 2.2939  |         | 0.9977  |         |
| EDRN 46           | Sc normal | -1.2926 |        | -1.2575 | -0.3686 |         | -2.2442 | 1.7006  |
| EDRN 47           | Sc normal | 0.9545  |        | 0.6853  | 0.6167  |         | 0.7167  | -0.1523 |
| EDRN 48           | Sc normal | -0.3093 |        | 0.1674  | -0.0614 |         | 0.6781  |         |
| EDRN 49           | Early CRC | -0.3026 |        | 1.3751  | 1.5771  | 0.2442  | 1.1729  | -0.4704 |
| EDRN 50           | Early CRC | -1.6575 |        | 1.3921  | -0.3161 | 1.1222  | -1.6820 | -0.1957 |
| EDRN 51           | Early CRC | -0.4335 |        | 3.9894  | 2.8266  | 3.2075  | 0.7371  | 0.4663  |
| EDRN 52           | Early CRC | 0.2335  |        | 2.0126  | 0.9317  | 0.2809  | 0.5541  | 0.1374  |
| EDRN 53           | Late CRC  | 0.3543  |        | 0.7681  | 1.1634  | -0.0393 | 0.6010  | 0.4652  |
| EDRN 54           | Late CRC  | -0.1270 |        | 0.2986  | 1.2238  | 0.6582  | -0.1074 | -0.9887 |
| EDRN 55           | Late CRC  | 0.5078  |        | 0.2529  | 1.2879  | 2.0865  | 0.5088  | 0.6163  |
| EDRN 56           | Late CRC  | 0.5977  |        | 1.1482  | 1.2287  | 0.8051  | 0.8265  | -0.0081 |
| EDRN 57           | A-Adenoma | 0.6621  |        |         | 1.6521  | 0.3332  | 0.4876  |         |
| EDRN 58           | A-Adenoma | 0.2209  |        |         | 1.3229  | 0.7742  | 0.4998  | -0.2319 |
| EDRN 59           | A-Adenoma | -0.1974 |        |         | 4.3214  | 0.4900  | 0.9139  |         |
| EDRN 60           | A-Adenoma | 0.1203  |        | 0.9256  | -0.2963 | 0.5324  | 0.3849  | -0.9488 |
| EDRN 61           | Adenomas  | 0.1128  |        | 0.5738  | 1.5530  |         | 0.7038  | -0.1717 |
| EDRN 62           | Adenomas  | -0.1054 |        | 0.0273  | 0.4522  |         | 0.6058  | -0.5167 |
| EDRN 63           | Adenomas  | -0.0267 |        | 0.6321  | 1.5476  |         | 0.1413  | 0.5938  |
| EDRN 64           | Adenomas  | 0.3355  |        | 0.4815  | 0.9325  |         | 0.3685  | 0.2367  |
| EDRN 65           | Sv normal | -0.5701 |        | -0.7571 | 1.5137  |         | 0.3783  | 1.0970  |
| EDRN 66           | Sv normal | 0.2328  |        | -0.1527 | 0.5871  |         | 0.6509  | -0.7704 |
| EDRN 67           | Sv normal | 0.3003  |        | -0.4932 | 0.7151  |         | 0.2153  | 0.7802  |

| Sample ID         | Status    | TCF4    | TMSB10 | UBE2S   | VIP     | VWF     | WDR1    | ZBTB22  |
|-------------------|-----------|---------|--------|---------|---------|---------|---------|---------|
| Confirmed in EDRN |           |         |        | v       | v       | v       | v       |         |
| EDRN 68           | Sv normal | -0.3939 |        | -0.5468 | 0.0568  |         |         | -1.6861 |
| EDRN 69           | Sc normal | 0.2557  |        | 0.1488  | 0.2005  | 0.2933  | 0.1126  | -0.9595 |
| EDRN 70           | Sc normal | 1.2921  |        | 0.0428  | 2.0767  | 1.5793  | 1.0526  | 0.0794  |
| EDRN 71           | Sc normal | 1.0220  |        | 0.5577  | 1.0525  | 0.9574  | 0.7634  | -0.0201 |
| EDRN 72           | Sc normal | 0.4188  |        | 0.1423  | 1.5000  | 0.7564  | 0.3614  | -0.4626 |
| EDRN 73           | Early CRC | 0.9324  |        | 1.5829  | 4.1966  | 1.8899  | 1.8060  | 1.9561  |
| EDRN 74           | Early CRC | 0.9577  |        | 1.4049  | 1.5437  | 0.4105  | 0.7324  | 1.6575  |
| EDRN 75           | Early CRC | 0.5394  |        | 0.0963  | 3.1032  | 1.0742  | 0.6118  | 0.5900  |
| EDRN 76           | Early CRC | 1.5003  |        | 1.5996  | 1.6463  | 1.6509  | 1.6852  | -0.4589 |
| EDRN 77           | Late CRC  | 0.1172  |        | 2.3032  | 2.2709  | 1.7069  | 1.0518  |         |
| EDRN 78           | Late CRC  | 0.1341  |        | 1.7090  | 2.7129  | 0.6893  | 1.2191  | 0.0236  |
| EDRN 79           | Late CRC  | 0.6809  |        | 1.2215  | 2.0811  | 1.6097  | 1.3565  | 0.6770  |
| EDRN 80           | Late CRC  | 0.6412  |        | 0.4121  | 1.3584  | -1.1102 | 1.2771  | -6.5794 |
| EDRN 81           | A-Adenoma | 0.1858  |        | 1.3058  | 0.7090  | 2.9388  | 0.9081  | 0.0291  |
| EDRN 82           | A-Adenoma | 0.7467  |        |         | 0.4633  | 2.7479  | 0.6931  | 0.5407  |
| EDRN 83           | A-Adenoma | 0.7460  |        | -0.0199 | 2.4319  | 3.0362  | 0.7524  | 0.6734  |
| EDRN 84           | A-Adenoma | 0.3160  |        | -0.1989 | -0.3236 | 1.0812  | 0.1099  | -0.3942 |
| EDRN 85           | Adenomas  | 0.5428  |        | -0.1000 | 2.1843  | 1.1425  | 0.7758  | 0.7601  |
| EDRN 86           | Adenomas  | 0.1111  |        | 0.5550  | 1.1826  | -0.5337 | 0.6234  | 0.7545  |
| EDRN 87           | Adenomas  | 0.4787  |        | 0.2620  | 1.7506  | -0.8297 | 0.5882  |         |
| EDRN 88           | Adenomas  | 0.6525  |        | 1.2539  | 1.8022  | 1.7262  | 0.6433  |         |
| EDRN 89           | Sv normal | -0.2499 |        | 1.1980  | 0.7465  | 0.5182  | -0.5222 | -0.8850 |
| EDRN 90           | Sv normal | -0.6619 |        | -0.4585 | 1.1077  | -0.2819 | -0.1115 | 0.2139  |
| EDRN 91           | Sv normal | -0.0128 |        | 0.8432  |         | -0.3628 | 1.0476  | -0.5976 |
| EDRN 92           | Sv normal | 0.7362  |        | 0.7515  | 0.7242  | 1.5009  | 0.2461  | 1.1019  |
| EDRN 93           | Sc normal | -0.2348 |        | 0.8989  | 0.5858  | 0.4573  | 0.2441  | 0.5805  |
| EDRN 94           | Sc normal | -1.7765 |        | -0.9466 | -0.7308 | -0.3305 | -1.3435 | -1.6073 |
| EDRN 95           | Sc normal | 0.0433  |        | 0.7664  | -0.1146 | -1.0132 | 0.5789  | -1.1708 |
| EDRN 96           | Sc normal | -4.2739 |        | -1.8910 | -2.8392 |         | -4.6236 | -0.8061 |
| EDRN 97           | Early CRC | -0.1367 |        | 0.7005  | 2.3549  | 0.6586  | 0.9984  | -0.3144 |
| EDRN 98           | Early CRC | 0.4357  |        | 1.4498  | 2.3162  | 2.9491  | 1.4555  | 0.6737  |
| EDRN 99           | Early CRC | 1.1158  |        | 0.3766  | 2.8665  | 0.3480  | 0.1530  | -0.2765 |
| EDRN 100          | Early CRC | 0.0136  |        | 0.5056  | 1.2322  | 1.6893  |         | 0.1638  |
| EDRN 101          | Late CRC  | 0.2649  |        | 0.3378  |         | 0.0389  | 0.7115  | -0.2058 |
| EDRN 102          | Late CRC  | 0.5309  |        | 0.9877  | 1.4585  | 0.3241  | 1.1710  |         |
| EDRN 103          | Late CRC  | -0.4427 |        | -0.0384 | 0.6930  | -0.4715 | 0.1515  | 0.3475  |
| EDRN 104          | Late CRC  | -0.4393 |        | 1.6070  | 0.7341  | 1.1615  | 0.7950  | -0.2797 |
| EDRN 105          | A-Adenoma | 0.0221  |        | 0.2141  | 2.0946  | 2.7730  | 0.3110  | 0.6818  |
| EDRN 106          | A-Adenoma | 0.1100  |        | 0.1699  | 2.4421  | 1.5362  | 0.9791  | -0.1163 |
| EDRN 107          | A-Adenoma | 0.4345  |        | 1.1128  |         | 0.2658  | 0.6985  |         |
| EDRN 108          | A-Adenoma | 0.6225  |        | 0.7232  | 2.2613  |         | 0.9560  | -0.0550 |
| EDRN 109          | Adenomas  | 0.3874  |        | 0.7537  | 1.2149  | 0.8683  | 0.6968  | -0.0658 |
| EDRN 110          | Adenomas  | -0.1556 |        | 1.8623  | 0.3516  | 1.1123  | -0.2362 | -0.3279 |
| EDRN 111          | Adenomas  | 0.5882  |        | 3.5944  | 2.0070  | 2.2443  | 1.2609  | -0.2506 |
| EDRN 112          | Adenomas  | -0.9371 |        | -3.0282 |         | -1.0520 | -2.5931 | 0.7376  |

| Sample ID         | Status    | TCF4    | TMSB10 | UBE2S   | VIP     | VWF     | WDR1    | ZBTB22  |
|-------------------|-----------|---------|--------|---------|---------|---------|---------|---------|
| Confirmed in EDRN |           |         |        | v       | v       | v       | v       |         |
| EDRN 113          | Sv normal | -0.2520 |        | 1.4094  | 0.7813  | 0.2262  | 0.0353  | -0.2622 |
| EDRN 114          | Sv normal | 0.2329  |        | 1.1108  | -0.0117 | 2.1813  | 0.3962  | -0.3946 |
| EDRN 115          | Sv normal | 0.2592  |        | 0.2365  | 0.9667  |         | 0.2815  | -0.4347 |
| EDRN 116          | Sv normal | -0.3249 |        | 0.2186  | -0.2810 |         | 0.4158  |         |
| EDRN 117          | Sc normal | -0.0068 |        | 0.6758  | 1.1109  |         | 0.5427  | -0.3145 |
| EDRN 118          | Sc normal | 0.2896  |        | 0.7496  | 1.1437  |         | 0.7212  | -1.1299 |
| EDRN 119          | Sc normal | 0.3073  |        |         | -0.5768 | -0.1665 | 0.0375  | 0.1119  |
| EDRN 120          | Sc normal | -0.0670 |        | -0.5112 | -0.7310 | 0.3494  | -0.1869 | -0.9074 |
| EDRN 121          | Early CRC | 1.6438  |        | -0.0339 | 1.2902  |         | 0.6879  |         |
| EDRN 122          | Early CRC | -0.3023 |        | 0.1234  | 0.9253  |         | -0.2276 | 0.8183  |
| EDRN 123          | Early CRC | -0.1016 |        | 0.2837  | 0.9272  |         | 0.8048  |         |
| EDRN 124          | Early CRC | -1.1582 |        | 1.0548  | 1.6415  |         | 0.7052  | 1.5474  |
| EDRN 125          | Late CRC  | -0.6340 |        | 0.4921  | 1.9165  |         | 0.9173  | 0.3252  |
| EDRN 126          | Late CRC  | -0.2958 |        | 0.3282  | 1.5767  |         | 0.3739  | -1.1487 |
| EDRN 127          | Late CRC  | 0.3031  |        | -0.2355 | 0.9105  | 1.0285  | 0.5797  | 0.1681  |
| EDRN 128          | Late CRC  | -0.2083 |        |         | 1.8250  | 0.7487  | 1.1874  | -0.6163 |
| EDRN 129          | A-Adenoma | 0.1605  |        | 1.0197  | 2.7663  | 0.6690  | 1.3147  | -0.7997 |
| EDRN 130          | A-Adenoma | -0.2747 |        | 0.4030  | 1.0788  | 1.1032  | 0.7661  | -0.4738 |
| EDRN 131          | A-Adenoma | 0.7284  |        | 0.9085  | 2.6581  | 0.2365  | 0.9399  | -1.0622 |
| EDRN 132          | A-Adenoma | 0.4344  |        | 0.5985  | 1.6162  | 1.4948  | 0.9920  | -1.5049 |
| EDRN 133          | Adenomas  | 0.7687  |        | 2.3209  | 0.6417  | 0.5162  | 0.4935  |         |
| EDRN 134          | Adenomas  | 0.2064  |        | 0.3887  | 0.9709  | 0.1437  | 0.6792  | -0.2293 |
| EDRN 135          | Adenomas  | 0.4538  |        | 1.8215  | 3.0622  | 0.6211  | 0.3318  | 0.1875  |
| EDRN 136          | Adenomas  | -0.8187 |        |         | -0.0130 | -0.3508 | 0.4547  | 3.2027  |
| EDRN 137          | Sv normal | 0.0878  |        | 0.8973  | 0.6835  | 1.6668  | 0.1379  | -1.9966 |
| EDRN 138          | Sv normal | -0.1469 |        | 0.5736  | 0.6329  | 1.5899  | 0.0185  | -0.4011 |
| EDRN 139          | Sv normal | -0.5205 |        | 0.5304  | 1.2487  | 0.7813  | -0.0710 | 1.2341  |
| EDRN 140          | Sv normal | 0.3976  |        | 1.1138  | 1.5867  |         | 0.3977  | 0.0931  |
| EDRN 141          | Sc normal | -0.1866 |        | 1.0355  | 0.1820  |         | -0.1288 | -0.2010 |
| EDRN 142          | Sc normal | 2.4538  |        | -1.1778 | -0.3366 | -0.1660 | -1.0266 | -1.4950 |
| EDRN 143          | Sc normal | -0.1530 |        | 1.0385  | 0.7523  | 1.3326  | -0.1919 | -1.2780 |
| EDRN 144          | Sc normal | 0.0146  |        | 0.1992  | 0.5675  | 1.8280  | 0.2133  | 0.6893  |
| EDRN 145          | Early CRC | 0.3542  |        | 1.6322  | 1.8118  | 1.4273  | 1.1933  | 0.8081  |
| EDRN 146          | Early CRC | 0.2328  |        | -0.0371 | -0.1412 | -0.6261 | 0.6244  | -0.0814 |
| EDRN 147          | Early CRC | 0.0927  |        | 3.3316  | 3.0906  | 3.2469  | 1.7487  |         |
| EDRN 148          | Early CRC | 0.0020  |        | 0.2966  | 2.3833  | 1.3624  |         | 0.6525  |
| EDRN 149          | Late CRC  | -0.0961 |        | 0.6158  | 1.8701  | 1.6189  | 0.3737  | 0.0851  |
| EDRN 150          | Late CRC  | 0.2162  |        | 0.8407  | 1.3521  | 1.2464  | 1.1053  | 0.7747  |
| EDRN 151          | Late CRC  | -0.1671 |        | 2.3526  | 3.2650  | 2.0111  | 1.2445  | 0.4615  |
| EDRN 152          | Late CRC  | -0.2397 |        | 0.3296  | 1.5821  | 1.7833  | 0.8730  | 0.7378  |
| EDRN 153          | A-Adenoma | -0.5601 |        | -2.3062 | -2.5090 | 2.2329  | -0.1839 | -3.3393 |
| EDRN 154          | A-Adenoma | 0.3385  |        | 0.5016  | 1.4070  | 0.6601  | 0.3682  | 0.3720  |
| EDRN 155          | A-Adenoma | 0.1052  |        | 0.6867  | 1.8770  | 1.7358  | 0.7188  |         |
| EDRN 156          | A-Adenoma | 0.1833  |        | 0.0556  | -0.9733 | -0.1340 | 0.8220  | 1.4132  |
| EDRN 157          | Adenomas  | 0.5160  |        | 1.0701  | 2.6167  | 0.5709  | 0.9580  | -0.8516 |

| Sample ID         | Status    | TCF4    | TMSB10 | UBE2S   | VIP     | VWF     | WDR1    | ZBTB22  |
|-------------------|-----------|---------|--------|---------|---------|---------|---------|---------|
| Confirmed in EDRN |           |         |        | v       | v       | v       | v       |         |
| EDRN 158          | Adenomas  | 1.0187  |        | 2.3573  | 1.8382  | 0.3547  | 0.6850  |         |
| EDRN 159          | Adenomas  | -0.3692 |        | 1.2131  | 0.8199  | 0.6020  | 0.2814  | -0.3522 |
| EDRN 160          | Adenomas  | -0.8319 |        | 2.9355  | 1.4601  | -0.0172 | -0.1864 | 0.1078  |
| EDRN 161          | Sv normal | -0.4188 |        | 0.1622  | 1.3702  | 0.5714  | -0.2575 | -1.4609 |
| EDRN 162          | Sv normal | 0.0965  |        | -2.5126 | -1.2735 |         | -0.2849 | -1.4878 |
| EDRN 163          | Sv normal | 0.0562  |        | 0.4148  | 1.3330  | -0.1051 | -0.1078 |         |
| EDRN 164          | Sv normal | 0.1876  |        | 0.4640  | 1.2809  | 0.6820  | -0.0990 | -0.5410 |
| EDRN 165          | Sc normal | -0.1688 |        | 0.2522  | 0.7206  | 0.7795  | -0.5483 |         |
| EDRN 166          | Sc normal | 1.5877  |        | -0.9652 | 0.8026  | 0.7453  | 0.1051  | 1.0847  |
| EDRN 167          | Sc normal | 0.3278  |        | 0.9761  | 0.9633  | -0.9488 |         | -0.4511 |
| EDRN 168          | Sc normal | 0.3886  |        | 0.7473  | 2.1632  | -0.0810 | 0.2202  | -0.1942 |
| EDRN 169          | Early CRC | 0.1857  |        | 2.0879  | 2.2656  | 1.9933  | 0.9980  | 2.2774  |
| EDRN 170          | Early CRC | -0.2341 |        | -0.3004 | 1.2631  | 1.9939  | 0.2943  | -0.0976 |
| EDRN 171          | Late CRC  | 0.0231  |        | 2.7394  | 2.7271  | 1.5344  | 0.3653  | -2.1287 |
| EDRN 172          | Late CRC  | 0.5659  |        | 1.3393  | 2.5815  | 2.2526  | 1.6836  | 1.7508  |
| EDRN 173          | A-Adenoma | 0.5423  |        | 0.7762  | 1.4687  | 0.3138  | 0.9783  | -0.8125 |
| EDRN 174          | A-Adenoma | 0.3826  |        | 0.2707  | 0.0202  |         | 0.2931  | 0.3591  |
| EDRN 175          | Adenomas  | 0.3839  |        | -0.0219 | 0.4738  | 1.5634  | 0.6277  |         |
| EDRN 176          | Adenomas  | 0.0058  |        | 1.0212  | 1.6480  | 0.4277  | 0.4978  |         |
| EDRN 177          | Sv normal | 0.0674  |        | 1.9250  | 1.6516  | -0.0866 | 0.5672  | 0.4105  |
| EDRN 178          | Sv normal | -0.0672 |        |         | 0.3909  | -0.6229 | 0.1946  | -2.1215 |
| EDRN 179          | Sc normal | -1.0553 |        | -2.1158 | 0.3069  | -0.6756 | -1.6500 | -0.7991 |
| EDRN 180          | Sc normal | 0.6262  |        | -0.2107 | -0.2419 | 0.4636  | 0.3249  | -0.3003 |
